# Supplementary material for: Unipolar distributions of junctional Myosin II identify cell stripe boundaries that drive cell intercalation throughout Drosophila axis extension
Source: eLife journal article supplement (doi:10.7554/elife.12094), 2016-05-16
Supplement: supp [file elife-12094-supp-v1.zip]

Archive with 25 entries (25 files):
- elife_poa_e12094_Figure_1_figure_supplement_1.pdf
- elife_poa_e12094_Figure_6_source_data_1.xlsx
- elife_poa_e12094_Figure_7_figure_supplement_1.pdf
- elife_poa_e12094_Figure_3_source_data_2.xlsx
- elife_poa_e12094_Source_Code.zip
- elife_poa_e12094_Figure_2_source_data_1.xlsx
- elife_poa_e12094_Video_1.mov
- elife_poa_e12094_Figure_3_source_data_1.xlsx
- elife_poa_e12094_Figure_4_source_data_1.xlsx
- elife_poa_e12094_Figure_7_source_data_1.xlsx
- elife_poa_e12094_Figure_1_source_data_1.xlsx
- elife_poa_e12094_Video_3.mov
- elife_poa_e12094_Figure_5_source_data_2.xlsx
- elife_poa_e12094_Video_2.mov
- elife_poa_e12094_Figure_1_figure_supplement_2.pdf
- elife_poa_e12094_Video_5.mp4
- elife_poa_e12094_Figure_5_figure_supplement_1.pdf
- elife_poa_e12094_Video_4.mov
- elife_poa_e12094_Figure_1_source_data_2.xlsx
- elife_poa_e12094_Figure_3_figure_supplement_1.pdf
- elife_poa_e12094_Figure_6_figure_supplement_1.pdf
- elife_poa_e12094_Figure_1_source_data_2.xlsx
- elife_poa_e12094_Figure_5_source_data_1.xlsx
- elife_poa_e12094_Figure_1_figure_supplement_3.pdf
- elife_poa_e12094_Figure_2_figure_supplement_1.pdf
