# Supplementary material for: Unipolar distributions of junctional Myosin II identify cell stripe boundaries that drive cell intercalation throughout Drosophila axis extension
Source: eLife journal article supplement (doi:10.7554/elife.12094), 2016-05-16
Supplement: supp [file elife-12094-supp-v1.zip › elife_poa_e12094_Figure_1_source_data_1.xlsx]

## Sheet: B
Figure 1B	Myosin II f.i. vs Time
Time after GBE onset (mins)	Average Myosin II at cell membranes (f.i.)
-20	4.25051
-19.5	4.23958
-19	4.25689
-18.5	4.14585
-18	4.41311
-17.5	4.59689
-17	4.7209
-16.5	4.64038
-16	4.53687
-15.5	4.98085
-15	4.63777
-14.5	4.69499
-14	5.10712
-13.5	4.85953
-13	5.79736
-12.5	5.74234
-12	5.84056
-11.5	6.28662
-11	6.53206
-10.5	7.12616
-10	7.19706
-9.5	7.19698
-9	7.30102
-8.5	7.42712
-8	8.06824
-7.5	7.98558
-7	7.84548
-6.5	7.45171
-6	8.30137
-5.5	8.01532
-5	8.54053
-4.5	8.20816
-4	8.43225
-3.5	9.22526
-3	9.11596
-2.5	9.55498
-2	9.64066
-1.5	9.97577
-1	10.1185
-0.5	10.8265
0	11.9929
0.5	12.9311
1	12.9174
1.5	13.6463
2	14.2257
2.5	14.7227
3	14.5845
3.5	16.3917
4	15.9042
4.5	17.3276
5	18.1594
5.5	19.2141
6	19.5423
6.5	19.9592
7	21.4027
7.5	21.7615
8	22.3532
8.5	22.0623
9	22.8877
9.5	23.3729
10	23.5239
10.5	23.0297
11	24.1626
11.5	24.8489
12	24.3216
12.5	23.9447
13	24.5781
13.5	24.9845
14	24.7662
14.5	24.761
15	24.6361
15.5	24.6378
16	24.895
16.5	25.5509
17	24.2358
17.5	24.9001
18	25.3177
18.5	24.8493
19	25.5263
19.5	24.8658
20	25.7766
20.5	24.8436
21	25.4873
21.5	24.918
22	25.1443
22.5	25.0603
23	25.7205
23.5	25.4264
24	26.3185
24.5	25.8111
25	25.9265
25.5	25.7615
26	25.2007
26.5	26.0889
27	26.4192
27.5	25.4135
28	25.7122
28.5	26.1676
29	26.5985
29.5	26.7694
30	26.6304
30.5	27.1358
31	27.1327
31.5	26.8728
32	26.5236
32.5	27.2327
33	26.4988
33.5	27.5398
34	27.8607
34.5	27.0488
35	27.8359
35.5	28.0043
36	27.4612
36.5	28.558
37	29.083
37.5	29.2094
38	29.0201
38.5	29.0537
39	29.782
39.5	28.8859
40	27.8825
40.5	28.8404
41	28.8244
41.5	29.1447
42	28.4982
42.5	28.4752
43	28.0312
43.5	28.5806
44	28.0679
44.5	27.5241
45	28.887
45.5	28.2566
46	28.3432
46.5	27.0501
47	27.741
47.5	28.0405
48	27.4281
48.5	28.0194
49	27.5156
49.5	27.6422
50	27.5417
50.5	28.4767
51	28.636
51.5	27.86
52	27.1906
52.5	27.4319
53	26.749
53.5	27.6985
54	28.1332
54.5	28.4869
55	27.4222
55.5	29.2954
56	28.882
56.5	28.7183
57	29.1793
57.5	29.3462
58	29.4442
58.5	30.3697
59	29.8933
59.5	30.6008
60	30.4215

## Sheet: C dash
Figure 1C'	Radial histogram of Myosin II bidirectional polarity orientation strength and direction
Degrees from AP (bin centres)	Average Myosin II bidirectional polarity (pp)	N	N x bipolarity strength
2.5	0.285026	8224	586.013
7.5	0.284159	8389	595.952
12.5	0.281144	8355	587.24
17.5	0.282808	7850	555.011
22.5	0.281844	7890	555.937
27.5	0.284183	7186	510.535
32.5	0.281216	6594	463.585
37.5	0.275925	5855	403.885
42.5	0.271499	5175	351.252
47.5	0.254942	4314	274.955
52.5	0.251432	3667	230.5
57.5	0.246557	3268	201.437
62.5	0.232692	2638	153.46
67.5	0.22503	2272	127.817
72.5	0.215115	2057	110.623
77.5	0.217208	2013	109.31
82.5	0.221326	1804	99.818
87.5	0.220224	1760	96.8986

## Sheet: C dashdash
Figure 1C''	Myosin II bidirectional polarity vs Time (data pooled from 6 embryos)
Time after GBE onset (mins)	Myosin II bidirectional polarity (Gaussian method, f.i.)
-20	0.00665004
-19.5	0.00745294
-19	0.00797448
-18.5	0.00865842
-18	0.00759945
-17.5	0.00863492
-17	0.00794102
-16.5	0.00874127
-16	0.00832471
-15.5	0.00730152
-15	0.0066281
-14.5	0.00928215
-14	0.00815062
-13.5	0.0136375
-13	0.00947896
-12.5	0.00951362
-12	0.00865476
-11.5	0.00860293
-11	0.0107348
-10.5	0.01286
-10	0.012973
-9.5	0.0137597
-9	0.0172616
-8.5	0.0192462
-8	0.0258123
-7.5	0.024426
-7	0.0254604
-6.5	0.0291316
-6	0.0310206
-5.5	0.0310967
-5	0.0402909
-4.5	0.0342382
-4	0.0417991
-3.5	0.0467263
-3	0.054864
-2.5	0.0481305
-2	0.0670127
-1.5	0.0658852
-1	0.0680199
-0.5	0.106125
0	0.11577
0.5	0.142236
1	0.137725
1.5	0.174446
2	0.195234
2.5	0.221354
3	0.263043
3.5	0.280617
4	0.314032
4.5	0.342568
5	0.351074
5.5	0.357039
6	0.378461
6.5	0.379467
7	0.423905
7.5	0.424045
8	0.41264
8.5	0.398845
9	0.37925
9.5	0.412978
10	0.410552
10.5	0.353943
11	0.349869
11.5	0.35757
12	0.340068
12.5	0.327073
13	0.314518
13.5	0.283944
14	0.300978
14.5	0.279839
15	0.258076
15.5	0.265872
16	0.310107
16.5	0.290535
17	0.261456
17.5	0.255166
18	0.242125
18.5	0.256318
19	0.248736
19.5	0.218745
20	0.250347
20.5	0.231975
21	0.233284
21.5	0.225989
22	0.210985
22.5	0.212385
23	0.221192
23.5	0.220701
24	0.24421
24.5	0.209714
25	0.195738
25.5	0.19152
26	0.194588
26.5	0.217985
27	0.205768
27.5	0.178819
28	0.189964
28.5	0.18964
29	0.193579
29.5	0.192872
30	0.187345
30.5	0.19121
31	0.202931
31.5	0.181902
32	0.164908
32.5	0.180362
33	0.185342
33.5	0.174669
34	0.154608
34.5	0.176544
35	0.162339
35.5	0.156337
36	0.174591
36.5	0.188776
37	0.172652
37.5	0.174965
38	0.175185
38.5	0.167583
39	0.171034
39.5	0.176793
40	0.159554
40.5	0.188713
41	0.169575
41.5	0.16538
42	0.177344
42.5	0.165759
43	0.145096
43.5	0.142704
44	0.16067
44.5	0.149661
45	0.164015
45.5	0.163525
46	0.153177
46.5	0.160167
47	0.139087
47.5	0.137166
48	0.135592
48.5	0.142097
49	0.122812
49.5	0.137912
50	0.165444
50.5	0.140899
51	0.134696
51.5	0.133201
52	0.131043
52.5	0.14072
53	0.119523
53.5	0.139682
54	0.131046
54.5	0.133083
55	0.12418
55.5	0.13895
56	0.14333
56.5	0.131021
57	0.119173
57.5	0.143585
58	0.141426
58.5	0.150591
59	0.15147
59.5	0.15804
60	0.168105

## Sheet: D dash
Figure 1D'	Radial histogram of Myosin II unidirectional polarity strength and direction
Degrees from AP (bin centres)	Average Myosin II unidirectional polarity (pp)	N	N x unipolarity strength
2.5	0.404569	1653	668.753
7.5	0.401116	1655	663.847
12.5	0.387338	1675	648.791
17.5	0.39428	1645	648.591
22.5	0.387522	1505	583.221
27.5	0.393327	1471	578.584
32.5	0.369776	1468	542.831
37.5	0.378066	1347	509.255
42.5	0.348827	1263	440.569
47.5	0.354928	1212	430.173
52.5	0.342467	1141	390.755
57.5	0.317384	1080	342.775
62.5	0.325467	1025	333.604
67.5	0.321861	965	310.596
72.5	0.317052	977	309.76
77.5	0.307641	974	299.642
82.5	0.320038	907	290.274
87.5	0.305215	922	281.408
92.5	0.3163	914	289.098
97.5	0.319166	889	283.739
102.5	0.314332	913	286.985
107.5	0.310338	911	282.718
112.5	0.31814	940	299.052
117.5	0.324658	903	293.166
122.5	0.330423	1005	332.075
127.5	0.331364	997	330.37
132.5	0.35597	1102	392.279
137.5	0.368887	1162	428.647
142.5	0.358838	1151	413.023
147.5	0.369903	1223	452.391
152.5	0.389876	1282	499.821
157.5	0.385768	1303	502.656
162.5	0.396425	1371	543.499
167.5	0.403572	1459	588.812
172.5	0.388046	1553	602.635
177.5	0.40368	1561	630.144
182.5	0.393527	1531	602.49
187.5	0.40589	1575	639.277
192.5	0.417337	1508	629.344
197.5	0.406941	1507	613.26
202.5	0.407817	1514	617.435
207.5	0.406055	1470	596.901
212.5	0.40149	1380	554.056
217.5	0.388241	1305	506.655
222.5	0.376257	1265	475.965
227.5	0.373807	1238	462.773
232.5	0.350872	1138	399.292
237.5	0.348241	1060	369.135
242.5	0.348919	1026	357.991
247.5	0.335271	1013	339.63
252.5	0.347335	990	343.862
257.5	0.325212	957	311.228
262.5	0.312201	907	283.166
267.5	0.322784	914	295.025
272.5	0.326788	956	312.409
277.5	0.316939	984	311.868
282.5	0.3139	949	297.891
287.5	0.323919	988	320.032
292.5	0.328128	1051	344.863
297.5	0.337325	1054	355.541
302.5	0.346524	1180	408.898
307.5	0.362772	1225	444.396
312.5	0.356603	1263	450.39
317.5	0.369102	1364	503.455
322.5	0.372625	1371	510.869
327.5	0.393708	1434	564.577
332.5	0.406235	1591	646.32
337.5	0.390128	1522	593.775
342.5	0.394889	1613	636.956
347.5	0.395699	1640	648.946
352.5	0.395291	1643	649.463
357.5	0.405024	1661	672.745

## Sheet: D dashdash
Figure 1D''	Myosin II unidirectional polarity vs Time (data pooled from 6 embryos)
Time after GBE onset (mins)	Myosin II unidirectional polarity (Gaussian method, f.i.)
-20	0.0689706
-19.5	0.0650192
-19	0.0790307
-18.5	0.0723034
-18	0.076605
-17.5	0.0675324
-17	0.0742878
-16.5	0.0659493
-16	0.0714631
-15.5	0.0799303
-15	0.0754699
-14.5	0.0741634
-14	0.0717553
-13.5	0.0771285
-13	0.0866745
-12.5	0.0818594
-12	0.104003
-11.5	0.0972981
-11	0.117528
-10.5	0.141983
-10	0.142366
-9.5	0.151816
-9	0.159176
-8.5	0.165979
-8	0.188172
-7.5	0.206014
-7	0.208571
-6.5	0.230314
-6	0.243578
-5.5	0.221162
-5	0.274632
-4.5	0.242066
-4	0.28091
-3.5	0.326146
-3	0.322081
-2.5	0.298206
-2	0.343554
-1.5	0.358618
-1	0.410711
-0.5	0.42603
0	0.502661
0.5	0.496809
1	0.530925
1.5	0.55718
2	0.596146
2.5	0.649126
3	0.658553
3.5	0.716012
4	0.733862
4.5	0.755932
5	0.833353
5.5	0.838939
6	0.862645
6.5	0.868074
7	0.968304
7.5	0.933335
8	1.01663
8.5	0.964239
9	1.06161
9.5	1.04862
10	1.02124
10.5	1.0783
11	1.1691
11.5	1.22734
12	1.19612
12.5	1.20767
13	1.21063
13.5	1.20913
14	1.27516
14.5	1.2731
15	1.3016
15.5	1.28527
16	1.23551
16.5	1.29561
17	1.30533
17.5	1.33191
18	1.36218
18.5	1.33579
19	1.31546
19.5	1.36803
20	1.43701
20.5	1.47085
21	1.49058
21.5	1.52117
22	1.51421
22.5	1.56543
23	1.59819
23.5	1.58107
24	1.60998
24.5	1.64631
25	1.62085
25.5	1.61778
26	1.63898
26.5	1.68841
27	1.72088
27.5	1.70132
28	1.66025
28.5	1.81043
29	1.86223
29.5	1.87472
30	1.82194
30.5	1.81827
31	1.8928
31.5	1.88638
32	1.96699
32.5	1.96192
33	1.98881
33.5	1.96111
34	1.97945
34.5	1.95293
35	1.98298
35.5	2.07916
36	2.04377
36.5	2.06775
37	2.07319
37.5	2.0414
38	2.04902
38.5	2.06739
39	2.02959
39.5	2.09718
40	2.07801
40.5	1.99215
41	1.98958
41.5	2.00885
42	1.9916
42.5	2.01807
43	1.94724
43.5	1.92072
44	1.92799
44.5	1.92736
45	2.01455
45.5	1.98007
46	1.88741
46.5	1.91758
47	1.9008
47.5	1.88795
48	1.85489
48.5	1.82723
49	1.77395
49.5	1.7825
50	1.73425
50.5	1.76663
51	1.84033
51.5	1.76845
52	1.76189
52.5	1.74856
53	1.7575
53.5	1.77839
54	1.79822
54.5	1.75612
55	1.71698
55.5	1.81242
56	1.77638
56.5	1.84027
57	1.78528
57.5	1.80738
58	1.82124
58.5	1.76647
59	1.8193
59.5	1.77626
60	1.78423
