# Supplementary material for: Unipolar distributions of junctional Myosin II identify cell stripe boundaries that drive cell intercalation throughout Drosophila axis extension
Source: eLife journal article supplement (doi:10.7554/elife.12094), 2016-05-16
Supplement: supp [file elife-12094-supp-v1.zip › elife_poa_e12094_Figure_1_source_data_2.xlsx]

## Sheet: A
Figure 2-figure supplement 1A	Interface alignment analysis over time for PSB, +1 and -1 interfaces in sqhAX3; sqhGFP; GAP43-mCherry embryos
Data Points					LOWESS
Time after GBE onset (mins)	PSB	+1	-1		Time after GBE onset (mins)	PSB	+1	-1
-20	0.384058	0.431579	0.419048		-20	0.390554	0.427949	0.431373
-19.5	0.417266	0.42268	0.460784		-19.8756	0.392006	0.428697	0.432624
-19	0.368794	0.424242	0.419048		-19.7512	0.393457	0.429445	0.433875
-18.5	0.4	0.442308	0.436893		-19.6268	0.394909	0.430193	0.435127
-18	0.433333	0.457143	0.446602		-19.5023	0.39636	0.430942	0.436377
-17.5	0.413333	0.451923	0.436893		-19.3779	0.396377	0.432225	0.435651
-17	0.402685	0.444445	0.448598		-19.2535	0.396367	0.433518	0.434886
-16.5	0.401316	0.416667	0.412844		-19.1291	0.396356	0.434812	0.434121
-16	0.418919	0.457944	0.439252		-19.0047	0.396346	0.436105	0.433357
-15.5	0.442953	0.462963	0.490741		-18.8803	0.39828	0.437233	0.434306
-15	0.447205	0.483051	0.441441		-18.7558	0.40029	0.438354	0.435323
-14.5	0.429448	0.461539	0.449153		-18.6314	0.4023	0.439475	0.43634
-14	0.414634	0.454545	0.449153		-18.507	0.40431	0.440596	0.437356
-13.5	0.43949	0.447155	0.444445		-18.3826	0.405339	0.441096	0.437796
-13	0.435556	0.427746	0.47093		-18.2582	0.406309	0.441559	0.438202
-12.5	0.448718	0.454023	0.412429		-18.1337	0.407279	0.442022	0.438607
-12	0.426778	0.4375	0.474576		-18.0093	0.40825	0.442486	0.439013
-11.5	0.454167	0.454023	0.4375		-17.8849	0.408547	0.442588	0.439211
-11	0.475	0.458101	0.474286		-17.7605	0.408789	0.442661	0.439393
-10.5	0.446721	0.469274	0.482955		-17.6361	0.409032	0.442734	0.439574
-10	0.445378	0.459893	0.460674		-17.5117	0.409274	0.442808	0.439756
-9.5	0.476988	0.431694	0.468927		-17.3873	0.41	0.442982	0.440148
-9	0.44856	0.450549	0.430168		-17.2628	0.410776	0.443167	0.440562
-8.5	0.457143	0.457895	0.459016		-17.1384	0.411552	0.443352	0.440977
-8	0.466942	0.465969	0.453552		-17.014	0.412327	0.443538	0.441391
-7.5	0.441177	0.494444	0.459016		-16.8896	0.413316	0.443832	0.441647
-7	0.458333	0.481675	0.483517		-16.7652	0.414332	0.444141	0.441883
-6.5	0.47541	0.507937	0.457895		-16.6408	0.415348	0.444449	0.442119
-6	0.469136	0.502674	0.473118		-16.5163	0.416363	0.444758	0.442354
-5.5	0.518072	0.497409	0.478723		-16.3919	0.417424	0.445431	0.443112
-5	0.482072	0.486339	0.47644		-16.2675	0.418491	0.446159	0.443949
-4.5	0.490272	0.518135	0.482233		-16.1431	0.419558	0.446887	0.444786
-4	0.519685	0.502591	0.497436		-16.0187	0.420625	0.447614	0.445623
-3.5	0.512	0.513089	0.515464		-15.8942	0.421494	0.447796	0.446126
-3	0.547619	0.531915	0.520408		-15.7698	0.422327	0.447881	0.446569
-2.5	0.540856	0.548223	0.547739		-15.6454	0.42316	0.447966	0.447012
-2	0.519531	0.532663	0.526829		-15.521	0.423993	0.44805	0.447456
-1.5	0.544747	0.585492	0.521739		-15.3966	0.424569	0.448077	0.447296
-1	0.570342	0.585	0.497674		-15.2722	0.425091	0.448092	0.447014
-0.5	0.55303	0.5625	0.515982		-15.1478	0.425614	0.448107	0.446733
0	0.574545	0.584541	0.524444		-15.0233	0.426137	0.448122	0.446451
0.5	0.605351	0.592105	0.575		-14.8989	0.426627	0.447925	0.446718
1	0.617162	0.579167	0.57874		-14.7745	0.427109	0.447678	0.447111
1.5	0.611842	0.606557	0.587549		-14.6501	0.427591	0.447433	0.447505
2	0.638365	0.621514	0.584559		-14.5257	0.428073	0.447187	0.447898
2.5	0.619761	0.644269	0.586716		-14.4012	0.428749	0.447192	0.448211
3	0.634006	0.661597	0.602787		-14.2768	0.429476	0.447263	0.448503
3.5	0.656161	0.637736	0.618881		-14.1524	0.430202	0.447334	0.448795
4	0.619444	0.637011	0.591503		-14.028	0.430928	0.447405	0.449087
4.5	0.67507	0.637993	0.62585		-13.9036	0.431814	0.447585	0.449381
5	0.669291	0.638513	0.623003		-13.7792	0.432747	0.447797	0.449677
5.5	0.673522	0.653979	0.64127		-13.6547	0.43368	0.448009	0.449973
6	0.6725	0.690476	0.643077		-13.5303	0.434613	0.448221	0.450268
6.5	0.68642	0.686869	0.651515		-13.4059	0.435311	0.448555	0.450618
7	0.706173	0.69	0.625		-13.2815	0.435933	0.448928	0.450986
7.5	0.710648	0.6625	0.621387		-13.1571	0.436555	0.449302	0.451354
8	0.691589	0.685801	0.639535		-13.0327	0.437178	0.449676	0.451722
8.5	0.711409	0.643275	0.618785		-12.9082	0.437858	0.450295	0.451842
9	0.683856	0.657738	0.605479		-12.7838	0.438558	0.451002	0.451873
9.5	0.699784	0.661891	0.616		-12.6594	0.439258	0.451709	0.451904
10	0.686695	0.642458	0.610526		-12.535	0.439958	0.452416	0.451936
10.5	0.672917	0.666667	0.609375		-12.4106	0.440561	0.452933	0.452537
11	0.671548	0.639474	0.604534		-12.2862	0.441125	0.453376	0.45336
11.5	0.697095	0.656	0.60199		-12.1617	0.441689	0.45382	0.454184
12	0.664609	0.649733	0.593052		-12.0373	0.442253	0.454263	0.455008
12.5	0.667364	0.64	0.586294		-11.9129	0.443053	0.454916	0.455287
13	0.679435	0.635417	0.600503		-11.7885	0.443955	0.455659	0.455331
13.5	0.666667	0.650386	0.575758		-11.6641	0.444858	0.456402	0.455376
14	0.649706	0.641753	0.598522		-11.5397	0.44576	0.457145	0.455421
14.5	0.664	0.625935	0.557789		-11.4152	0.446462	0.457801	0.455822
15	0.660377	0.593137	0.569712		-11.2908	0.447071	0.458416	0.456391
15.5	0.689981	0.614078	0.571429		-11.1664	0.44768	0.459031	0.456959
16	0.666038	0.606796	0.589372		-11.042	0.448289	0.459646	0.457527
16.5	0.681648	0.598109	0.558195		-10.9176	0.44876	0.460281	0.457814
17	0.672794	0.591449	0.544811		-10.7932	0.449161	0.460927	0.457957
17.5	0.663586	0.595402	0.569412		-10.6687	0.449563	0.461572	0.4581
18	0.654206	0.6	0.574822		-10.5443	0.449964	0.462217	0.458244
18.5	0.662879	0.561485	0.569007		-10.4199	0.450658	0.462823	0.458353
19	0.674812	0.565909	0.539906		-10.2955	0.451515	0.463407	0.458444
19.5	0.676301	0.581114	0.57346		-10.1711	0.452372	0.46399	0.458535
20	0.683616	0.53253	0.567816		-10.0467	0.453229	0.464574	0.458626
20.5	0.675978	0.537209	0.562353		-9.92224	0.454166	0.465292	0.458954
21	0.671506	0.555809	0.571429		-9.79782	0.455151	0.466091	0.459423
21.5	0.66787	0.553047	0.575964		-9.67341	0.456136	0.46689	0.459893
22	0.66065	0.534091	0.592342		-9.54899	0.457121	0.467689	0.460362
22.5	0.680776	0.5625	0.585648		-9.42457	0.45792	0.468781	0.46083
23	0.673077	0.519824	0.598152		-9.30016	0.458598	0.470064	0.461298
23.5	0.669565	0.532731	0.58427		-9.17574	0.459276	0.471347	0.461765
24	0.681416	0.511211	0.579439		-9.05132	0.459954	0.472629	0.462232
24.5	0.672566	0.523077	0.583138		-8.9269	0.460915	0.473847	0.463066
25	0.685613	0.51663	0.584296		-8.80249	0.462075	0.47502	0.464159
25.5	0.670841	0.490066	0.535469		-8.67807	0.463234	0.476193	0.465251
26	0.681739	0.50776	0.556561		-8.55365	0.464394	0.477366	0.466344
26.5	0.672504	0.484163	0.563084		-8.42924	0.46556	0.478569	0.467285
27	0.660142	0.477778	0.56492		-8.30482	0.466732	0.479793	0.468112
27.5	0.644483	0.498906	0.57243		-8.1804	0.467903	0.481018	0.468939
28	0.657439	0.514477	0.550228		-8.05599	0.469074	0.482242	0.469765
28.5	0.686308	0.515625	0.553288		-7.93157	0.470242	0.483493	0.470681
29	0.651489	0.515695	0.533333		-7.80715	0.471407	0.484765	0.47167
29.5	0.656584	0.492063	0.552204		-7.68274	0.472573	0.486037	0.472659
30	0.636204	0.465324	0.538462		-7.55832	0.473738	0.487309	0.473647
30.5	0.663102	0.501124	0.56		-7.4339	0.475153	0.488461	0.474643
31	0.662432	0.509009	0.549161		-7.30949	0.47679	0.489507	0.475643
31.5	0.669078	0.474654	0.561905		-7.18507	0.478426	0.490553	0.476644
32	0.684307	0.465721	0.558537		-7.06065	0.480063	0.4916	0.477645
32.5	0.652095	0.470588	0.514218		-6.93624	0.481663	0.492805	0.478524
33	0.658182	0.465882	0.526191		-6.81182	0.483228	0.494163	0.479286
33.5	0.666041	0.469194	0.539024		-6.6874	0.484793	0.49552	0.480048
34	0.658041	0.465116	0.535714		-6.56299	0.486358	0.496877	0.480811
34.5	0.648289	0.45933	0.533816		-6.43857	0.487892	0.498132	0.481788
35	0.645594	0.478261	0.52439		-6.31415	0.489394	0.499283	0.482986
35.5	0.66092	0.485366	0.545232		-6.18973	0.490897	0.500433	0.484184
36	0.687861	0.463357	0.539604		-6.06532	0.492399	0.501583	0.485382
36.5	0.675889	0.46778	0.555556		-5.9409	0.494023	0.502827	0.486545
37	0.639604	0.472422	0.537468		-5.81649	0.495782	0.504174	0.487669
37.5	0.672655	0.476077	0.534884		-5.69207	0.497541	0.505521	0.488792
38	0.67	0.460465	0.523077		-5.56765	0.4993	0.506868	0.489916
38.5	0.659491	0.465882	0.510152		-5.44323	0.500846	0.508308	0.491067
39	0.65748	0.480278	0.555556		-5.31882	0.502139	0.509859	0.492252
39.5	0.672802	0.456731	0.526717		-5.1944	0.503431	0.51141	0.493437
40	0.666667	0.458629	0.511278		-5.06998	0.504724	0.512961	0.494622
40.5	0.648536	0.463007	0.541667		-4.94557	0.506299	0.514642	0.495883
41	0.659483	0.4575	0.532467		-4.82115	0.508238	0.51649	0.497244
41.5	0.651007	0.481663	0.53562		-4.69673	0.510177	0.518338	0.498604
42	0.655405	0.478697	0.538874		-4.57232	0.512116	0.520186	0.499964
42.5	0.646119	0.468514	0.538462		-4.4479	0.514087	0.521927	0.501358
43	0.646512	0.451852	0.531507		-4.32348	0.516105	0.523519	0.502797
43.5	0.628916	0.449495	0.536932		-4.19907	0.518122	0.525111	0.504237
44	0.633971	0.46384	0.54902		-4.07465	0.52014	0.526703	0.505676
44.5	0.637681	0.490765	0.530899		-3.95023	0.522073	0.52844	0.507098
45	0.656642	0.449468	0.527697		-3.82582	0.523878	0.530395	0.508495
45.5	0.665842	0.453826	0.521614		-3.7014	0.525684	0.53235	0.509891
46	0.65995	0.469657	0.506024		-3.57698	0.527489	0.534306	0.511288
46.5	0.654912	0.489362	0.506135		-3.45257	0.529393	0.536269	0.512649
47	0.670103	0.466125	0.501548		-3.32815	0.531456	0.538247	0.513953
47.5	0.681347	0.457219	0.514793		-3.20373	0.533518	0.540224	0.515257
48	0.66579	0.470109	0.510769		-3.07931	0.535581	0.542201	0.516562
48.5	0.692722	0.461095	0.498433		-2.9549	0.537527	0.544141	0.517891
49	0.676136	0.468571	0.50774		-2.83048	0.539268	0.546012	0.519265
49.5	0.680791	0.469565	0.468354		-2.70607	0.541008	0.547884	0.520639
50	0.699708	0.465714	0.476038		-2.58165	0.542748	0.549756	0.522013
50.5	0.712209	0.456091	0.477124		-2.45723	0.544564	0.551595	0.523306
51	0.710059	0.456825	0.488136		-2.33282	0.546525	0.553371	0.524444
51.5	0.716463	0.479769	0.477816		-2.2084	0.548486	0.555146	0.525581
52	0.707692	0.44152	0.452459		-2.08398	0.550447	0.556922	0.526719
52.5	0.700617	0.467647	0.475862		-1.95956	0.552543	0.5588	0.527983
53	0.710692	0.461539	0.487719		-1.83515	0.554922	0.56089	0.529512
53.5	0.689873	0.427326	0.467391		-1.71073	0.557301	0.562979	0.531041
54	0.69906	0.465875	0.487179		-1.58631	0.55968	0.565069	0.53257
54.5	0.726115	0.475219	0.518797		-1.4619	0.562	0.566978	0.534158
55	0.70418	0.45614	0.503906		-1.33748	0.564184	0.568478	0.535879
55.5	0.718644	0.454545	0.471774		-1.21306	0.566368	0.569978	0.537601
56	0.689286	0.447205	0.487395		-1.08865	0.568552	0.571478	0.539323
56.5	0.678571	0.476635	0.484849		-0.96423	0.570674	0.573005	0.541174
57	0.709434	0.420245	0.516432		-0.839813	0.572641	0.574601	0.543347
57.5	0.692946	0.443137	0.524096		-0.715396	0.574608	0.576198	0.545519
58	0.70082	0.411067	0.527607		-0.590979	0.576575	0.577794	0.547691
58.5	0.698276	0.431034	0.526946		-0.466563	0.578635	0.579496	0.549834
59	0.657025	0.421053	0.514793		-0.342146	0.580948	0.581487	0.551895
59.5	0.654471	0.483051	0.493507		-0.217729	0.583261	0.583478	0.553956
60	0.691983	0.487288	0.533742		-0.0933123	0.585574	0.585469	0.556018
					0.0311045	0.587848	0.587412	0.558078
					0.155521	0.590003	0.589209	0.560135
					0.279938	0.592158	0.591007	0.562192
					0.404355	0.594313	0.592805	0.564249
					0.528772	0.5964	0.594597	0.56617
					0.653188	0.598258	0.596371	0.567638
					0.777605	0.600116	0.598145	0.569107
					0.902022	0.601974	0.599919	0.570575
					1.02644	0.603817	0.601741	0.572041
					1.15086	0.605607	0.603741	0.573496
					1.27527	0.607397	0.605741	0.574952
					1.39969	0.609187	0.607742	0.576407
					1.52411	0.611005	0.609679	0.577842
					1.64852	0.612936	0.611352	0.579191
					1.77294	0.614867	0.613026	0.580539
					1.89736	0.616798	0.6147	0.581888
					2.02177	0.618678	0.616339	0.583241
					2.14619	0.620311	0.617815	0.584614
					2.27061	0.621944	0.619292	0.585986
					2.39502	0.623577	0.620768	0.587359
					2.51944	0.625252	0.622193	0.588723
					2.64386	0.627156	0.62334	0.590035
					2.76827	0.629059	0.624487	0.591346
					2.89269	0.630963	0.625633	0.592658
					3.01711	0.632841	0.626741	0.593934
					3.14153	0.634564	0.627601	0.594982
					3.26594	0.636286	0.628462	0.596029
					3.39036	0.638009	0.629322	0.597077
					3.51478	0.639694	0.630212	0.598091
					3.63919	0.641098	0.631314	0.598851
					3.76361	0.642502	0.632417	0.599611
					3.88802	0.643906	0.633519	0.600371
					4.01244	0.645354	0.634615	0.601158
					4.13686	0.647202	0.635658	0.602192
					4.26128	0.649049	0.6367	0.603227
					4.38569	0.650897	0.637742	0.604261
					4.51011	0.652681	0.638778	0.605251
					4.63453	0.653744	0.639733	0.605741
					4.75894	0.654808	0.640689	0.606231
					4.88336	0.655871	0.641645	0.606721
					5.00778	0.656934	0.642595	0.607206
					5.13219	0.657989	0.643467	0.607621
					5.25661	0.659045	0.644338	0.608036
					5.38103	0.6601	0.645209	0.608451
					5.50544	0.661149	0.646069	0.60885
					5.62986	0.662061	0.646653	0.608907
					5.75428	0.662974	0.647238	0.608963
					5.87869	0.663886	0.647823	0.60902
					6.00311	0.664796	0.648394	0.609073
					6.12753	0.66563	0.648402	0.608979
					6.25195	0.666464	0.648411	0.608885
					6.37636	0.667297	0.64842	0.608791
					6.50078	0.668129	0.648428	0.608696
					6.62519	0.66868	0.648377	0.608363
					6.74961	0.66923	0.648325	0.60803
					6.87403	0.669781	0.648274	0.607698
					6.99845	0.670331	0.648222	0.607365
					7.12286	0.670515	0.648021	0.607251
					7.24728	0.670693	0.647818	0.607139
					7.3717	0.670871	0.647614	0.607028
					7.49611	0.67105	0.647411	0.606916
					7.62053	0.671056	0.647445	0.606736
					7.74495	0.671056	0.647487	0.606553
					7.86936	0.671056	0.647529	0.606371
					7.99378	0.671057	0.647571	0.606189
					8.1182	0.671196	0.647206	0.605665
					8.24261	0.671342	0.64682	0.605124
					8.36703	0.671489	0.646434	0.604582
					8.49145	0.671635	0.646047	0.604041
					8.61586	0.671453	0.646064	0.603647
					8.74028	0.671248	0.646109	0.603263
					8.8647	0.671042	0.646155	0.60288
					8.98911	0.670836	0.646201	0.602497
					9.11353	0.67089	0.645965	0.602183
					9.23795	0.670968	0.645701	0.601876
					9.36237	0.671045	0.645437	0.601569
					9.48678	0.671123	0.645174	0.601262
					9.6112	0.67096	0.644745	0.600745
					9.73561	0.670767	0.644297	0.600204
					9.86003	0.670575	0.643849	0.599663
					9.98445	0.670382	0.643401	0.599122
					10.1089	0.67029	0.643066	0.598564
					10.2333	0.670212	0.642748	0.598003
					10.3577	0.670133	0.64243	0.597443
					10.4821	0.670055	0.642111	0.596882
					10.6065	0.670092	0.641418	0.596268
					10.7309	0.670147	0.640661	0.595645
					10.8554	0.670203	0.639905	0.595022
					10.9798	0.670259	0.639148	0.594399
					11.1042	0.670297	0.638587	0.593775
					11.2286	0.670333	0.638064	0.593151
					11.353	0.670368	0.637541	0.592527
					11.4774	0.670403	0.637018	0.591903
					11.6019	0.670133	0.63622	0.591259
					11.7263	0.669794	0.63536	0.590611
					11.8507	0.669456	0.634501	0.589964
					11.9751	0.669117	0.633642	0.589316
					12.0995	0.669097	0.632751	0.588726
					12.224	0.669156	0.631852	0.588151
					12.3484	0.669215	0.630953	0.587575
					12.4728	0.669275	0.630054	0.587
					12.5972	0.669302	0.629157	0.58647
					12.7216	0.66932	0.628262	0.585953
					12.846	0.669338	0.627366	0.585437
					12.9704	0.669355	0.626471	0.58492
					13.0949	0.669253	0.625524	0.584243
					13.2193	0.669112	0.624561	0.583516
					13.3437	0.668971	0.623599	0.582789
					13.4681	0.66883	0.622637	0.582063
					13.5925	0.668817	0.62143	0.581567
					13.717	0.668848	0.62014	0.581152
					13.8414	0.668879	0.61885	0.580737
					13.9658	0.66891	0.617559	0.580322
					14.0902	0.669113	0.616256	0.579691
					14.2146	0.669382	0.614947	0.578978
					14.339	0.66965	0.613638	0.578265
					14.4634	0.669918	0.612329	0.577551
					14.5879	0.670064	0.611082	0.577228
					14.7123	0.67016	0.60986	0.577068
					14.8367	0.670255	0.608639	0.576908
					14.9611	0.670351	0.607418	0.576747
					15.0855	0.670487	0.606426	0.57651
					15.2099	0.670641	0.60554	0.576238
					15.3344	0.670795	0.604654	0.575966
					15.4588	0.67095	0.603768	0.575693
					15.5832	0.670848	0.602643	0.575442
					15.7076	0.670618	0.601399	0.575201
					15.832	0.670389	0.600155	0.574959
					15.9565	0.670159	0.598911	0.574718
					16.0809	0.670134	0.597673	0.574359
					16.2053	0.670219	0.596439	0.573936
					16.3297	0.670303	0.595205	0.573514
					16.4541	0.670388	0.59397	0.573091
					16.5785	0.670347	0.592757	0.572962
					16.703	0.670233	0.591557	0.573005
					16.8274	0.670118	0.590356	0.573048
					16.9518	0.670003	0.589156	0.573091
					17.0762	0.669962	0.587963	0.573283
					17.2006	0.669966	0.586776	0.573571
					17.325	0.669971	0.585589	0.573859
					17.4495	0.669975	0.584401	0.574147
					17.5739	0.670058	0.58314	0.574278
					17.6983	0.670194	0.581827	0.574302
					17.8227	0.67033	0.580515	0.574326
					17.9471	0.670466	0.579202	0.57435
					18.0715	0.670683	0.577809	0.574349
					18.196	0.67096	0.576354	0.574329
					18.3204	0.671237	0.5749	0.57431
					18.4448	0.671514	0.573446	0.57429
					18.5692	0.671739	0.57223	0.574316
					18.6936	0.671922	0.571205	0.574378
					18.818	0.672105	0.57018	0.57444
					18.9425	0.672288	0.569154	0.574502
					19.0669	0.672392	0.56806	0.574769
					19.1913	0.67243	0.566907	0.575213
					19.3157	0.672468	0.565754	0.575658
					19.4401	0.672505	0.564601	0.576102
					19.5645	0.672532	0.563301	0.576315
					19.689	0.672548	0.561865	0.576312
					19.8134	0.672565	0.560429	0.576309
					19.9378	0.672581	0.558993	0.576307
					20.0622	0.672541	0.557839	0.57633
					20.1866	0.672444	0.556967	0.57638
					20.311	0.672346	0.556096	0.576431
					20.4355	0.672249	0.555224	0.576481
					20.5599	0.672186	0.554302	0.576555
					20.6843	0.672161	0.553326	0.576655
					20.8087	0.672136	0.55235	0.576755
					20.9331	0.67211	0.551374	0.576855
					21.0575	0.672101	0.550271	0.576887
					21.182	0.672109	0.549019	0.57684
					21.3064	0.672118	0.547767	0.576793
					21.4308	0.672126	0.546516	0.576746
					21.5552	0.672145	0.545272	0.576655
					21.6796	0.672176	0.544037	0.576508
					21.8041	0.672208	0.542802	0.576361
					21.9285	0.672239	0.541567	0.576214
					22.0529	0.6723	0.540435	0.575953
					22.1773	0.672402	0.539444	0.575539
					22.3017	0.672503	0.538453	0.575125
					22.4261	0.672604	0.537462	0.57471
					22.5506	0.672585	0.536315	0.574307
					22.675	0.672387	0.534942	0.573921
					22.7994	0.672189	0.533568	0.573535
					22.9238	0.671991	0.532194	0.573148
					23.0482	0.671816	0.531034	0.572676
					23.1726	0.671678	0.530212	0.572066
					23.297	0.671539	0.52939	0.571456
					23.4215	0.671401	0.528568	0.570847
					23.5459	0.671267	0.527686	0.570284
					23.6703	0.671141	0.5267	0.569801
					23.7947	0.671015	0.525714	0.569318
					23.9191	0.670889	0.524729	0.568835
					24.0435	0.6707	0.523842	0.56836
					24.168	0.670392	0.523141	0.5679
					24.2924	0.670084	0.52244	0.567439
					24.4168	0.669776	0.521739	0.566979
					24.5412	0.669502	0.520984	0.566491
					24.6656	0.669296	0.520123	0.565948
					24.7901	0.669089	0.519261	0.565404
					24.9145	0.668882	0.518399	0.564861
					25.0389	0.66862	0.517557	0.5643
					25.1633	0.668233	0.51676	0.563699
					25.2877	0.667846	0.515962	0.563098
					25.4121	0.667459	0.515165	0.562497
					25.5365	0.667127	0.514464	0.562073
					25.661	0.666927	0.513995	0.562076
					25.7854	0.666727	0.513525	0.56208
					25.9098	0.666527	0.513056	0.562083
					26.0342	0.666286	0.512517	0.562002
					26.1586	0.66594	0.511792	0.561701
					26.283	0.665593	0.511067	0.5614
					26.4075	0.665247	0.510343	0.561098
					26.5319	0.664929	0.50969	0.560766
					26.6563	0.664697	0.509248	0.560342
					26.7807	0.664464	0.508806	0.559918
					26.9051	0.664232	0.508364	0.559494
					27.0296	0.664037	0.507938	0.559056
					27.154	0.66396	0.507562	0.55857
					27.2784	0.663884	0.507187	0.558084
					27.4028	0.663807	0.506812	0.557598
					27.5272	0.663775	0.506373	0.557082
					27.6516	0.6639	0.505706	0.556458
					27.7761	0.664026	0.505039	0.555833
					27.9005	0.664151	0.504373	0.555209
					28.0249	0.664243	0.503662	0.554637
					28.1493	0.664197	0.502775	0.554274
					28.2737	0.664152	0.501889	0.553911
					28.3981	0.664106	0.501002	0.553548
					28.5225	0.663991	0.500109	0.553175
					28.647	0.663563	0.499191	0.552757
					28.7714	0.663134	0.498273	0.55234
					28.8958	0.662705	0.497354	0.551922
					29.0202	0.662351	0.496434	0.551548
					29.1446	0.662383	0.4955	0.551394
					29.2691	0.662416	0.494566	0.551241
					29.3935	0.662448	0.493632	0.551088
					29.5179	0.662473	0.492742	0.550901
					29.6423	0.662455	0.492112	0.550512
					29.7667	0.662437	0.491482	0.550123
					29.8911	0.662419	0.490852	0.549734
					30.0156	0.662437	0.490267	0.549369
					30.14	0.66271	0.490001	0.549172
					30.2644	0.662982	0.489735	0.548975
					30.3888	0.663255	0.489469	0.548777
					30.5132	0.663493	0.489154	0.548551
					30.6376	0.663439	0.48843	0.548076
					30.762	0.663385	0.487705	0.547601
					30.8865	0.663331	0.48698	0.547126
					31.0109	0.66328	0.486246	0.546663
					31.1353	0.663251	0.485412	0.546323
					31.2597	0.663223	0.484577	0.545982
					31.3841	0.663194	0.483743	0.545641
					31.5085	0.66316	0.482939	0.545288
					31.633	0.663057	0.482556	0.544771
					31.7574	0.662953	0.482174	0.544253
					31.8818	0.66285	0.481791	0.543736
					32.0062	0.662737	0.481415	0.54322
					32.1306	0.662438	0.481162	0.54273
					32.255	0.662139	0.48091	0.542241
					32.3795	0.66184	0.480658	0.541751
					32.5039	0.661554	0.480403	0.541279
					32.6283	0.661683	0.480098	0.541362
					32.7527	0.661812	0.479793	0.541446
					32.8771	0.661941	0.479488	0.541529
					33.0016	0.66207	0.479183	0.541611
					33.126	0.662128	0.478947	0.541543
					33.2504	0.662187	0.478711	0.541474
					33.3748	0.662246	0.478475	0.541406
					33.4992	0.662304	0.478239	0.541337
					33.6236	0.662258	0.477968	0.541102
					33.7481	0.662212	0.477696	0.540865
					33.8725	0.662165	0.477424	0.540629
					33.9969	0.662119	0.477152	0.540392
					34.1213	0.662165	0.476946	0.540199
					34.2457	0.662214	0.476741	0.540006
					34.3701	0.662263	0.476536	0.539814
					34.4946	0.662312	0.476331	0.539622
					34.619	0.662474	0.476223	0.539461
					34.7434	0.662642	0.476119	0.539302
					34.8678	0.66281	0.476015	0.539143
					34.9922	0.662977	0.475911	0.538984
					35.1166	0.663169	0.475598	0.538956
					35.2411	0.663363	0.475272	0.538937
					35.3655	0.663557	0.474945	0.538919
					35.4899	0.66375	0.474618	0.5389
					35.6143	0.663743	0.474216	0.538647
					35.7387	0.663717	0.473807	0.538372
					35.8631	0.663691	0.473398	0.538097
					35.9876	0.663666	0.472989	0.537822
					36.112	0.663285	0.472845	0.537627
					36.2364	0.662865	0.472731	0.53744
					36.3608	0.662445	0.472617	0.537254
					36.4852	0.662025	0.472502	0.537067
					36.6096	0.661693	0.472345	0.536709
					36.7341	0.661373	0.472181	0.536328
					36.8585	0.661054	0.472017	0.535947
					36.9829	0.660734	0.471853	0.535566
					37.1073	0.660787	0.471645	0.535401
					37.2317	0.660899	0.471429	0.53527
					37.3561	0.661011	0.471213	0.535139
					37.4806	0.661123	0.470997	0.535008
					37.605	0.660841	0.470743	0.534918
					37.7294	0.660485	0.470482	0.534834
					37.8538	0.660129	0.470221	0.534751
					37.9782	0.659773	0.469961	0.534668
					38.1026	0.659419	0.46987	0.534718
					38.2271	0.659065	0.469815	0.534797
					38.3515	0.658711	0.469761	0.534876
					38.4759	0.658357	0.469707	0.534955
					38.6003	0.658101	0.4696	0.535172
					38.7247	0.657869	0.469481	0.535421
					38.8491	0.657637	0.469361	0.53567
					38.9736	0.657406	0.469242	0.53592
					39.098	0.657195	0.468979	0.535682
					39.2224	0.65699	0.468677	0.535312
					39.3468	0.656785	0.468375	0.534942
					39.4712	0.65658	0.468073	0.534571
					39.5956	0.656228	0.468017	0.534456
					39.7201	0.655832	0.468036	0.534419
					39.8445	0.655436	0.468054	0.534381
					39.9689	0.655039	0.468073	0.534343
					40.0933	0.654718	0.468088	0.534429
					40.2177	0.654422	0.468101	0.534557
					40.3421	0.654126	0.468114	0.534685
					40.4666	0.653829	0.468127	0.534812
					40.591	0.653735	0.468111	0.534618
					40.7154	0.653715	0.468084	0.534305
					40.8398	0.653695	0.468056	0.533992
					40.9642	0.653675	0.468029	0.533679
					41.0887	0.65359	0.468064	0.533415
					41.2131	0.65348	0.468124	0.53317
					41.3375	0.65337	0.468185	0.532926
					41.4619	0.65326	0.468245	0.532681
					41.5863	0.653268	0.468092	0.532372
					41.7107	0.653328	0.467845	0.532035
					41.8351	0.653388	0.467597	0.531698
					41.9596	0.653449	0.46735	0.53136
					42.084	0.653515	0.467129	0.530952
					42.2084	0.653583	0.46692	0.530509
					42.3328	0.653652	0.466712	0.530066
					42.4572	0.65372	0.466504	0.529623
					42.5817	0.653917	0.466384	0.529135
					42.7061	0.654181	0.466311	0.528623
					42.8305	0.654446	0.466238	0.528111
					42.9549	0.65471	0.466164	0.527599
					43.0793	0.655027	0.466233	0.527094
					43.2037	0.655374	0.466383	0.526593
					43.3282	0.655721	0.466533	0.526092
					43.4526	0.656067	0.466683	0.525591
					43.577	0.65662	0.466857	0.524996
					43.7014	0.657299	0.467046	0.524343
					43.8258	0.657979	0.467234	0.52369
					43.9502	0.658658	0.467423	0.523037
					44.0746	0.659367	0.467501	0.522236
					44.1991	0.660095	0.467506	0.521336
					44.3235	0.660822	0.467511	0.520436
					44.4479	0.661551	0.467516	0.519536
					44.5723	0.662317	0.467309	0.518721
					44.6967	0.66311	0.466948	0.517966
					44.8212	0.663904	0.466586	0.517212
					44.9456	0.664698	0.466225	0.516458
					45.07	0.66541	0.46616	0.51568
					45.1944	0.666058	0.466327	0.514885
					45.3188	0.666706	0.466494	0.514089
					45.4432	0.667355	0.466662	0.513294
					45.5677	0.667984	0.466797	0.512502
					45.6921	0.668597	0.466906	0.511714
					45.8165	0.66921	0.467014	0.510926
					45.9409	0.669823	0.467123	0.510138
					46.0653	0.670512	0.467115	0.509428
					46.1897	0.671272	0.467001	0.508788
					46.3141	0.672031	0.466886	0.508148
					46.4386	0.67279	0.466772	0.507508
					46.563	0.673612	0.466513	0.50685
					46.6874	0.674496	0.466112	0.506174
					46.8118	0.67538	0.46571	0.505497
					46.9362	0.676264	0.465309	0.504821
					47.0607	0.677075	0.465044	0.50417
					47.1851	0.677809	0.464924	0.503545
					47.3095	0.678543	0.464804	0.50292
					47.4339	0.679277	0.464683	0.502295
					47.5583	0.679958	0.464614	0.501595
					47.6827	0.680578	0.464601	0.500807
					47.8072	0.681199	0.464589	0.50002
					47.9316	0.681819	0.464577	0.499233
					48.056	0.682544	0.464485	0.498478
					48.1804	0.683397	0.464296	0.49776
					48.3048	0.684251	0.464106	0.497043
					48.4292	0.685104	0.463917	0.496326
					48.5537	0.685811	0.463773	0.49569
					48.6781	0.686325	0.463691	0.49516
					48.8025	0.68684	0.463609	0.494631
					48.9269	0.687354	0.463527	0.494101
					49.0513	0.687954	0.463402	0.493533
					49.1757	0.688679	0.463214	0.492911
					49.3002	0.689404	0.463026	0.492288
					49.4246	0.690129	0.462838	0.491665
					49.549	0.690826	0.462638	0.491263
					49.6734	0.691478	0.462418	0.491202
					49.7978	0.692131	0.462199	0.491141
					49.9222	0.692784	0.461979	0.49108
					50.0467	0.693335	0.461768	0.491009
					50.1711	0.693715	0.46157	0.490919
					50.2955	0.694094	0.461372	0.490829
					50.4199	0.694474	0.461174	0.490739
					50.5443	0.694783	0.461007	0.490674
					50.6687	0.694961	0.460896	0.490654
					50.7932	0.695138	0.460785	0.490634
					50.9176	0.695316	0.460674	0.490614
					51.042	0.695488	0.460544	0.490576
					51.1664	0.695649	0.460376	0.490503
					51.2908	0.695809	0.460207	0.49043
					51.4152	0.695969	0.460039	0.490357
					51.5397	0.696083	0.459756	0.490357
					51.6641	0.696098	0.459227	0.490511
					51.7885	0.696113	0.458698	0.490666
					51.9129	0.696128	0.45817	0.49082
					52.0373	0.696154	0.457778	0.491103
					52.1617	0.696207	0.457709	0.491687
					52.2862	0.69626	0.457641	0.492271
					52.4106	0.696312	0.457572	0.492855
					52.535	0.696369	0.457405	0.493379
					52.6594	0.696438	0.456983	0.493751
					52.7838	0.696507	0.456561	0.494123
					52.9083	0.696576	0.456139	0.494494
					53.0327	0.696592	0.455738	0.494845
					53.1571	0.696458	0.455392	0.495138
					53.2815	0.696323	0.455046	0.49543
					53.4059	0.696188	0.4547	0.495722
					53.5303	0.696105	0.454467	0.496098
					53.6547	0.696182	0.454585	0.496733
					53.7792	0.696258	0.454704	0.497367
					53.9036	0.696335	0.454822	0.498002
					54.028	0.696372	0.454831	0.498596
					54.1524	0.696274	0.454458	0.499047
					54.2768	0.696176	0.454085	0.499498
					54.4012	0.696078	0.453712	0.499949
					54.5257	0.695892	0.453312	0.500324
					54.6501	0.695362	0.452809	0.500408
					54.7745	0.694833	0.452307	0.500492
					54.8989	0.694304	0.451804	0.500576
					55.0233	0.693816	0.451349	0.500705
					55.1478	0.693505	0.451103	0.501033
					55.2722	0.693195	0.450858	0.501362
					55.3966	0.692885	0.450612	0.50169
					55.521	0.692527	0.450371	0.502105
					55.6454	0.691931	0.450159	0.502957
					55.7698	0.691336	0.449947	0.503808
					55.8942	0.690741	0.449735	0.504659
					56.0187	0.690197	0.449541	0.505491
					56.1431	0.689952	0.449458	0.506214
					56.2675	0.689707	0.449374	0.506936
					56.3919	0.689462	0.44929	0.507658
					56.5163	0.689233	0.449146	0.508399
					56.6407	0.689117	0.448596	0.509268
					56.7652	0.689	0.448045	0.510136
					56.8896	0.688883	0.447494	0.511005
					57.014	0.688699	0.447055	0.511823
					57.1384	0.687972	0.447515	0.512231
					57.2628	0.687244	0.447975	0.51264
					57.3873	0.686517	0.448435	0.513049
					57.5117	0.685806	0.448866	0.513444
					57.6361	0.685258	0.44902	0.513708
					57.7605	0.684711	0.449174	0.513971
					57.8849	0.684164	0.449328	0.514235
					58.0093	0.68359	0.449556	0.514489
					58.1337	0.682679	0.450717	0.514618
					58.2582	0.681768	0.451878	0.514747
					58.3826	0.680857	0.453039	0.514876
					58.507	0.679932	0.454198	0.514999
					58.6314	0.678765	0.455307	0.51503
					58.7558	0.677598	0.456417	0.515061
					58.8802	0.67643	0.457527	0.515091
					59.0047	0.675312	0.458678	0.515135
					59.1291	0.675526	0.460969	0.515537
					59.2535	0.67574	0.463261	0.51594
					59.3779	0.675953	0.465552	0.516342
					59.5023	0.676178	0.467804	0.516769
					59.6268	0.677048	0.467797	0.518653
					59.7512	0.677917	0.467789	0.520537
					59.8756	0.678787	0.467782	0.522421
					60	0.679657	0.467774	0.524305

## Sheet: A Statistics
Figure 2-figure supplement 1A - Statistical analysis
Kolmogorov-Smirnov Tests at 40 mins
PSB vs. +1				PSB	+1	-1
p	<0.0001		N	480	423	399
D	0.2183
PSB vs. -1
p	<0.0001
D	0.1583
+1 vs. -1
p	0.1425
D	0.0802

## Sheet: G
Figure 2-figure supplement 1G	Lengths of ablated PSB and +1 interfaces
Interface Length (µm)
PSB	+1
8.29698	7.5423
3.5522	7.77477
6.95038	10.3338
6.36786	7.60982
5.25826	7.0085
8.11356	3.09718
7.90041	10.703
6.76948	5.04612
13.2027	7.48788
3.69531	6.05208
8.81315	8.16731
9.78267	7.51173
5.29169	5.34141
6.27582	8.66064
10.2172	8.76024
7.33704	7.25188
9.29203	8.36854
4.20006	7.30849
7.05922	8.59311

## Sheet: G Statistics
Figure 2-figure supplement 1G - Statistical analysis
Comparison of ablated PSB and +1 interface length
Two-tailed unpaired t-test with equal variances				F test of equal variances			D'Agostino & Pearson omnibus normality test
p	0.7469			F	1.868			PSB	+1
t	0.3252			DFn	18		K2	1.725	3.122
df	36			DFd	18		p	0.4221	0.2099
				p	0.1945
N values
PSB	19
+1	19

## Sheet: H
Figure 2-figure supplement 1H	Myosin II insensity in ablated PSB and +1 interfaces
Normalised Interface Myosin II f.i.
PSB	Plus 1
0.935539	0.953053
1.3048	0.822273
1.40393	0.978419
1.33335	0.961143
1.4746	1.02173
1.44295	1.0262
1.34539	0.922785
1.59572	1.26135
1.11991	1.09444
1.17735	1.08183
1.17792	0.893089
1.29395	0.895611
1.37081	0.923404
1.37414	1.06865
1.30332	0.871197
1.49968	1.20781
1.29014	1.08321
1.65092	0.998407
1.2277	0.935397

## Sheet: H Statistics
Figure 2-figure supplement 1H - Statistical analysis
Comparison of ablated PSB and +1 interface Myosin II intensity
Two-tailed unpaired t-test with equal variances				F test of equal variances			D'Agostino & Pearson omnibus normality test
p	<0.0001			F	2.195			PSB	+1
t	7.169			DFn	18		K2	1.241	2.525
df	36			DFd	18		p	0.5377	0.283
				p	0.1043
N values
PSB	19
+1	19

## Sheet: I
Figure 2-figure supplement 1I	Orientation of ablated PSB and +1 interfaces
Interface Orientation (˚)
PSB	Plus 1
80.707	70.243
56.899	39.529
83.421	84.231
77.574	49.88
87.734	75.277
83.595	81.573
78.466	76.118
78.817	71.832
81.456	62.549
84.373	83.278
76.124	53.535
64.617	70.257
85.097	57.304
88.699	75.955
83.876	72.679
81.926	84.479
74.055	72.408
86.537	84.074
88.309	68.553

## Sheet: I Statistics
Figure 2-figure supplement 1I - Statistical analysis
Kolmogorov-Smirnov Tests of ablated PSB and +1 interface orientation distributions
PSB vs. +1				PSB	+1
p	0.0034		N	19	19
D	0.5789

## Sheet: J
Figure 2-figure supplement 1J	Interface orientations at 40mins for PSB, +1 and -1 interfaces
PSB	+1	-1
83.9482	47.1702	37.6864
51.7683	85.4581	8.70325
81.6379	62.9492	89.8601
69.142	25.916	72.4194
87.3049	65.5043	71.3604
32.8434	59.0044	77.2057
89.5494	18.6397	5.159
79.5136	85.2134	86.2355
44.4268	30.7667	21.1292
74.2594	56.8566	68.871
62.8621	68.4525	82.3897
69.8038	68.8708	29.4579
77.8434	38.4917	83.8584
79.1756	63.7851	60.7407
51.0517	52.093	55.3004
85.0436	42.3057	84.7673
52.9254	2.74603	47.6943
79.5136	79.8741	86.5805
58.314	63.5562	39.9982
60.7402	82.4618	64.4721
87.3056	1.11984	34.8742
69.4957	66.4513	89.643
39.5642	45.6848	47.5001
71.8398	51.2707	49.5721
68.2122	35.5958	70.5231
47.5001	68.8707	47.0695
81.7781	87.3057	20.1395
83.7842	48.0164	47.6955
47.6943	56.4405	78.5594
64.2442	73.0054	2.69507
72.6848	0.846802	42.3058
89.6002	59.5831	87.3057
40.3965	75.7135	73.2541
69.9799	72.4694	56.8565
74.3111	63.6397	82.7679
67.9191	19.1071	84.8691
84.5642	64.4721	48.646
60.7407	80.6733	16.0868
70.8928	77.0521	83.6667
70.0745	51.3452	85.4092
87.3057	74.2588	36.3843
47.6943	20.2198	88.6661
57.8298	62.7006	52.6106
7.61057	38.948	45.1495
53.0504	55.0468	53.6005
87.4998	60.7407	57.157
48.4212	36.3842	69.3563
52.8887	75.4171	29.2593
61.0644	24.4957	69.1421
77.2331	64.0838	80.3367
51.7682	68.8705	85.2107
70.8928	77.052	84.2274
74.2266	68.8719	57.9812
79.6996	85.4969	75.9383
21.1302	29.9104	87.7882
79.8741	75.6162	29.8761
62.3707	15.7413	77.2399
87.3057	51.7798	59.2387
84.5642	47.5002	37.5199
89.9083	89.118	71.1741
87.3057	61.7308	45.2133
88.4801	60.6832	78.7844
87.4998	75.6048	83.3959
42.3058	43.2298	45.2872
65.8043	64.8972	81.8439
72.9474	9.2721	70.3719
60.7405	50.4096	49.3729
28.9132	51.2464	85.9018
44.3278	14.0591	85.6271
68.8707	86.5197	75.3151
74.0652	53.8676	49.3729
80.1652	18.3209	85.6271
89.6094	62.6384	61.4677
62.4286	81.6017	43.807
77.835	71.0381	69.929
54.6633	51.937	70.9877
51.937	18.8432	73.7384
77.4452	85.1619	23.6995
47.7521	66.4756	35.9805
75.1357	50.4146	62.6975
89.5573	35.9917	28.8167
68.9095	23.3857	55.0712
84.6453	73.1224	38.0629
75.7613	59.062	35.3366
77.2702	46.7426	66.9855
69.2375	29.3172	81.6485
85.6271	67.9945	74.0156
81.2284	83.0628	68.1977
71.0062	71.5907	29.1481
40.6271	58.4109	54.6633
85.6271	53.7716	65.3183
49.3729	63.9074	76.8809
22.1924	85.6271	53.2515
54.5674	45.141	14.0613
87.6021	74.317	72.8228
68.8129	54.2984	75.1136
57.0689	55.8927	38.6522
89.8352	72.3286	72.6907
69.6817	47.2119	36.1425
54.7288	21.849	82.7978
80.1868	25.9139	78.4276
62.3675	31.0442	55.7131
57.503	83.1375	21.8985
87.7404	32.1744	75.938
61.183	44.618	72.5716
88.8976	52.5528	55.0835
23.552	77.9834	78.4028
72.7285	57.8256	6.11841
85.6271	71.1743	85.6271
40.6272	23.7687	30.4911
44.6093	54.6633	25.5688
71.1745	51.1186	75.3579
87.0204	80.8635	49.931
40.6266	45.8215	62.6553
49.3733	75.5039	77.944
49.3723	67.1924	43.702
87.1198	66.727	55.3712
85.6271	41.8724	62.6888
69.9292	30.0828	57.6403
77.497	89.8635	70.7854
83.332	48.7573	78.1684
74.7998	78.2747	56.2713
71.3898	57.503	49.9309
73.817	32.2341	63.2677
71.1569	81.813	72.474
69.0268	54.5673	72.8043
59.7206	88.772	29.7062
75.3222	38.8373	6.39966
8.06435	24.8533	56.1825
49.3729	56.2693	43.0818
17.3675	41.2427	49.931
62.3675	83.2973	21.6338
74.0349	41.859	86.8777
79.8385	6.62918	76.496
86.9593	76.496	74.5775
38.063	69.639	56.2712
85.627	11.1012	85.069
30.5024	42.3906	49.9316
52.7392	75.491	80.3101
40.6277	48.1992	40.069
61.0035	82.7867	58.0612
4.37293	44.8328	78.7287
83.5445	76.496	57.056
49.373	31.2543	70.1377
78.0325	25.5346	52.2683
53.4586	86.0503	68.5647
87.3716	51.379	73.1296
72.5715	59.737	79.807
79.6181	21.183	27.2646
40.6272	40.0687	85.069
54.5011	83.2416	74.6653
79.4416	63.7512	49.9348
16.9017	75.4909	41.8009
59.6778	23.3664	10.125
65.8282	48.5998	18.2665
16.9017	89.6068	80.6703
64.2565	38.637	69.5849
73.4751	69.0245	85.7688
72.8686	42.6716	86.4662
49.931	80.5102	74.7062
85.0695	66.6339	86.5216
75.8375	68.366	80.7858
88.0819	72.8043	59.7889
66.1201	69.7298	11.4218
23.3659	11.0034	47.8617
48.6855	64.7574	70.0171
53.7761	46.4093	88.9045
66.6336	27.9742	9.76221
88.0198	85.069	69.2401
56.271	48.1992	43.2841
54.1052	84.246	66.5891
85.069	82.4022	72.624
49.9318	69.1236	19.2725
65.1859	80.8948	86.5216
53.203	57.8383	58.9698
83.9457	71.5734	59.7882
63.2677	68.5525	57.451
59.3937	57.9402	73.349
63.6982	88.0891	49.6517
88.6965	80.9496	73.9417
27.2371	33.1021	37.1692
82.6495	57.9411	71.2748
70.4871	79.2466	14.9564
69.5806	26.6769	55.3033
79.6287	30.2116	37.1683
59.3932	80.9496	60.2997
66.634	45.0979	84.3159
84.4395	41.5219	59.9565
31.4963	82.9453	59.7882
58.504	74.4527	66.9134
76.7587	79.4423	86.5216
46.4096	72.1402	40.0141
70.9684	3.4328	38.6125
85.069	49.6516	75.2117
61.8704	47.285	81.6569
70.1376	74.6329	84.016
76.2879	41.5215	53.2899
58.5836	84.7323	25.427
75.4909	16.5588	64.7198
64.513	65.4693	63.0129
82.1334	28.7175	51.3874
70.9686	80.5125	82.2853
71.7324	54.4252	86.5216
70.6482	27.8147	56.3184
83.0423	39.0161	80.9496
60.7873	41.5216	45.253
68.7556	79.2159	48.4787
86.801	78.3914	82.6939
49.532	67.4488	66.9134
1.07791	39.5467	47.6481
36.4353	75.6814	54.8186
74.4981	75.0449	69.4189
66.9134	64.1414	83.1735
51.8449	73.5933	50.524
74.2568	60.4077	78.67
58.2608	11.8222	72.1078
53.9188	86.3534	58.9395
61.8041	77.5488	63.2219
86.5216	21.7227	14.9558
78.927	64.7203	89.1352
40.0142	20.9651	54.0506
56.804	73.6377	44.9021
62.5142	55.5577	60.4462
53.2899	58.4047	80.0017
71.7961	48.848	41.521
21.9129	75.0435	85.5165
73.9927	41.5216	48.6466
83.2511	74.7532	49.6517
88.9407	14.0394	63.7335
86.5216	69.4189	14.9564
65.0854	45.9203	59.3663
64.7202	52.3059	72.7386
71.6768	88.6042	72.2021
38.3421	56.7768	56.5903
82.694	47.1765	89.8521
64.4853	15.5793	69.9231
14.9551	57.7883	83.5118
73.9418	62.5592	26.3405
38.9191	87.5723	62.798
58.2208	38.3537	55.4395
68.7033	34.0902	82.9862
41.5215	67.7091	85.9489
77.5488	54.9141	35.3319
87.8538	72.108	38.5119
50.2678	37.7902	45.9433
83.4705	80.9496	1.91431
53.2421	32.0889	52.5482
69.6632	86.5216	20.0769
55.6034	25.8585	74.6701
60.492	71.6769	36.4197
66.9134	40.1125	79.5605
41.5203	35.1813	0.637024
77.9899	68.9106	77.7294
41.5222	24.9235	36.6028
63.7336	69.4757	30.4505
89.9897	22.1222	83.5119
54.8184	86.6918	71.4172
65.6238	45.6368	43.2756
69.0346	70.8594	86.1833
67.9184	84.5995	68.5804
66.9134	81.6797	74.1227
45.6071	55.2112	84.3933
20.9659	40.1783	78.0535
81.9438	70.2662	78.0527
76.441	39.7572	49.822
32.059	22.081	40.6026
75.2117	83.5119	24.9227
85.8838	28.8682	80.2989
84.4005	72.8588	40.8025
57.094	20.0769	46.0988
64.3552	75.3817	35.4178
89.5482	48.2942	56.9467
55.5579	54.0907	45.6321
59.7883	24.3071	67.035
41.5216	86.1145	38.0956
72.8146	42.9106	74.0496
37.1229	10.8869	61.7106
47.9632	37.0799	61.5006
80.8591	64.0719	37.0044
89.3142	74.6868	87.7418
87.0085	37.3184	84.5994
89.1846	35.0986	69.0806
86.5216	87.3257	37.1654
86.5216	82.4517	47.4843
48.4784	51.4882	86.5247
80.6033	40.1782	46.2937
82.6381	76.8021	42.0251
48.4793	80.5428	54.0908
39.231	43.358	42.4571
81.2136	78.3174	73.8743
68.0866	52.9326	66.7433
71.7783	80.5428	45.7775
64.7201	48.4382	78.0541
63.2221	57.3655	71.6233
62.5148	82.293	40.1782
82.1683	72.5579	78.1973
32.9542	14.6183	57.8281
75.0435	47.081	68.2567
68.0866	54.2145	20.5656
72.2021	51.4881	76.7621
65.0769	77.5416	79.4294
38.512	34.6978	58.2084
88.9238	35.3747	72.8006
88.0612	60.313	75.5239
78.0532	42.0258	44.9625
67.3227	46.0078	59.1407
48.2943	89.1825	81.6392
83.5118	36.1259	77.9951
42.0264	84.7307	51.9462
81.2332	21.5892	57.5638
56.3623	36.6643	54.3657
81.2327	37.4517	47.6429
71.713	37.0044	88.7648
65.0769	65.0772	41.7509
75.1175	64.9838	56.2933
79.3856	55.3886	75.6428
53.7665	40.7145	58.7645
63.3769	58.2771	30.9601
78.7483	83.5807	75.2902
82.4518	35.3319	1.2356
52.5482	83.5119	47.5375
85.633	38.5119	49.1537
38.5118	69.0594	69.9851
80.2414	75.3818	46.2356
46.7246	76.8959	55.3979
76.8794	76.3869	62.5057
84.7987	8.63586	81.9423
79.6297	70.7782	46.235
65.077	89.3881	39.0296
48.6255	49.8117	79.4711
37.7812	85.1429	72.8011
65.5247	54.5612	88.7644
81.3471	74.0209	64.6708
37.4517	73.5093	68.0371
88.0612	88.7644	72.21
67.4335	36.4121	56.5687
50.6067	52.5757	4.70381
85.7039	25.9805	7.94542
66.8126	53.3606	26.1641
64.017	81.8909	70.3812
82.4519	51.4299	73.71
85.1485	89.3881	43.7647
69.091	35.9308	61.6119
63.5828	35.1118	26.3464
88.358	71.9455	78.4644
73.6461	80.0912	82.4894
68.2568	43.7644	34.9257
49.6982	56.937	3.73413
84.2371	68.6157	63.9359
46.2337	38.8653	39.8956
50.1242	50.3952	72.5752
89.0566	1.2356	86.9678
83.5119	41.4739	47.85
84.7988	35.4512	34.9257
38.5115	71.1404	43.7643
79.1131	43.7642	53.9684
43.0859	43.7638	51.4301
78.0546	74.1435	65.5946
60.3133	56.8553	62.181
54.5009	85.8731	7.57582
78.3176	25.4147	77.1992
51.4883	80.6343	76.7529
83.5119	55.0742	59.9068
53.874	62.1991	10.653
79.9837	66.4603	80.3375
33.7482	88.7644	62.6251
76.2631	88.7644	48.9588
62.7981	68.7813	83.5849
24.9232	88.4428	17.1991
68.5805	5.10458	88.7644
34.1132	50.6343	68.6158
78.0716	82.3206	87.7935
51.4881	70.3811	76.4996
81.5566	66.7917	43.8496
70.7076	56.5687	75.527
79.3854	75.5933	31.2357
75.9171	67.273	67.7269
52.548	12.3915	67.737
81.0223	10.4237	29.8461
61.2705	14.628	58.5612
83.5119	14.628	1.23553
86.6819	78.3606	34.3017
43.6332	68.0372	69.3244
42.5833	70.9124	78.063
75.7744	54.6626	86.472
78.9708	54.2559	54.3839
88.7644	32.4547	57.1569
60.4636	87.2073	88.7644
68.8555	70.3309	41.4719
85.9853	14.8626	74.728
71.6617	51.1346	44.8661
79.1815	37.6488	47.85
74.6286	53.3606	72.8006
66.8613	52.3801	80.6341
88.7632	57.5457	88.7645
51.7279	69.4341	9.06924
88.764	34.3014	75.0575
59.7098	88.7644	88.7644
76.2356	3.35664	41.7894
87.0798	58.7645
71.4104	53.0105
60.7701	46.2356
43.7645	74.1435
69.6642	68.0369
75.1621	33.241
78.5889	48.6916
70.3292	1.2356
85.6049	81.3094
65.2658	28.5094
52.5757	35.6158
68.2084	57.3058
79.5462	63.8359
87.9575	46.2539
47.9493	78.9308
71.7495	57.8007
88.4429	75.9802
35.6161	56.2936
72.8002	60.7358
87.7935	34.9259
42.3351	79.5535
38.0537	50.0496
38.1056	44.2261
86.3449	50.6342
88.7644
83.6411
79.4043
70.3302
85.3796
55.6979
69.0692
83.5699
47.1903
70.7734
52.737
83.6408
58.4608
88.7649
17.1993
46.2362
83.1053
70.3295
82.1454
74.5363
55.698
68.2719
78.4596
51.9462
75.7698
85.6363
32.1991
88.7644
71.7956
88.7668
58.3305
56.759
63.4341
80.6343
62.1994
43.7645
72.8007
50.1048
46.2356
85.3979
50.1047
58.7638
43.2228
88.7644
43.7643
88.7644
63.1631
71.0107
55.0743
62.6249
84.8192
82.8583
38.1056
55.0739
62.6252
72.4357
55.0743

## Sheet: K
Figure 2-figure supplement 1K	Interface orientations at 40mins for PSB, +1 and -1 interfaces
PSB	+1	-1
58.7952	68.8775	63.6614
39.5809	45.2249	74.2793
76.7289	40.9612	26.1313
67.0609	29.8439	54.9001
50.8239	41.4089	19.2153
49.9697	71.167	43.1036
78.4655	20.6011	11.4646
50.8907	56.1102	55.0802
78.9147	84.9108	48.5892
60.0302	37.6503	60.9757
34.1116	80.049	20.7806
56.0851	70.3397	26.3403
80.8526	89.7753	66.6725
63.6596	28.1219	70.8507
49.9697	14.3961	34.849
70.183	80.5293	85.404
60.4799	42.8662	63.6596
61.7029	61.924	77.5105
62.5788	39.4196	80.9316
81.7261	42.622	61.1701
49.174	34.4405	49.4095
80.7623	59.4517	45.2247
77.23	69.7923	74.1757
55.7162	10.5596	37.1349
59.261	70.7847	73.8299
80.5871	9.315	70.2416
64.0655	39.6973	38.0997
41.8582	59.0399	58.4651
75.8042	0.684723	10.4002
77.2464	26.7148	80.5357
62.1522	62.6994	70.2385
45.2247	37.9326	52.9466
85.3005	65.7807	2.86938
48.2375	40.0117	52.3496
21.3466	8.84033	78.3361
74.8439	78.9149	48.2435
36.6451	41.139	59.9294
49.7986	44.7752	81.4785
47.5016	75.3384	72.3574
89.7753	52.1777	33.9147
25.8048	82.5818	46.46
57.5798	90	73.4034
48.5894	68.4286	78.9911
81.0275	47.3373	54.6871
83.2902	41.186	40.9145
69.5196	42.6627	85.7858
50.1943	84.5597	57.9946
83.3676	83.2903	82.875
85.4262	30.9638	83.0728
78.69	49.3988	26.5651
74.5779	17.1028	76.7014
81.573	36.0272	57.5288
61.3897	64.5366	41.2686
69.6236	64.5367	13.2404
86.9059	62.4473	80.1341
63.9705	15.1011	87.8252
43.3153	2.60254	51.1154
51.3402	28.3008	73.9264
83.3952	45.0001	68.9625
80.8376	82.1467	47.7263
66.8014	18.0042	20.8978
66.8014	81.8699	46.7356
64.0256	46.9091	46.1935
69.5074	79.6952	65.2249
79.439	51.7891	39.2894
69.1456	36.8699	43.2101
36.3843	46.8476	57.4074
83.6597	52.6961	48.6522
86.8779	32.9053	51.3402
71.5652	56.31	47.2025
63.4351	32.4712	23.1987
84.8056	78.6902	88.1524
63.778	65.9246	72.8973
90	48.3665	48.0128
74.4072	41.9059	18.4349
68.9625	45	38.2902
86.7078	42.9546	33.6901
80.6416	74.5778	53.13
35.4253	46.2454	61.9274
41.536	45.0001	39.7099
67.7321	9.09024	54.7823
72.7849	28.443	31.6075
81.7576	12.7712	81.5289
78.5775	61.9908	11.5236
70.4476	88.9583	75.0686
58.9238	55.008	48.0128
80.2787	43.9584	0.855103
41.4194	65.2249	63.8861
69.736	59.0363	29.8573
75.8514	46.7356	87.095
89.8877	84.8056	30.8514
82.0723	83.8298	5.89667
24.0748	54.5746	61.9904
83.1779	56.1975	89.2309
77.9991	25.3136	44.1883
83.4026	58.9239	36.7575
56.1976	4.68616	82.76
62.7068	76.0726	89.8877
63.3224	41.5212	48.2542
68.8502	73.5553	88.7802
67.6554	89.8877	67.2678
37.7626	46.7968	76.6166
66.9137	85.2683	81.7575
5.08209	64.649	68.0862
56.4225	36.7575	63.9371
47.9005	3.53995	71.0547
62.3624	60.3673	69.6795
81.1397	81.7577	33.8842
77.2683	83.5474	42.597
66.5025	42.9784	50.3067
85.9424	56.6724	39.6932
24.6052	87.8217	76.8138
22.5918	12.4164	38.9815
70.7086	46.0811	80.0318
81.9822	80.2081	70.8817
60.3675	44.8877	56.1976
51.3707	74.6323	7.92761
73.9422	26.6774	86.2982
89.8877	61.5019	78.453
	81.0221	79.0474
	81.9823	73.9423
	54.5475	82.7627
	82.2929	83.2695
	36.9821	83.3462
	67.4185	50.4152
	34.7631	79.3267
	78.4531	72.1872
	56.1825
	47.614
	31.8931
	23.8618
	35.0684
	77.6864
	77.1177
	75.4669
	47.0873
	59.6313
	69.2579
	38.772
	62.7065
	68.0862
	81.0808
	56.7297

[truncated: 1 more sheets: L]
