# Supplementary material for: Unipolar distributions of junctional Myosin II identify cell stripe boundaries that drive cell intercalation throughout Drosophila axis extension
Source: eLife journal article supplement (doi:10.7554/elife.12094), 2016-05-16
Supplement: supp [file elife-12094-supp-v1.zip › elife_poa_e12094_Figure_1_source_data_2.xlsx]

## Sheet: A
Figure 1-figure supplement 1A: Rate of average tissue extension in AP vs time
	Tissue strain rate in AP orientation (pp/hr)
Time after GBE onset (mins)	SG_1	SG_2	SG_3	SG_4	SG_5	SG_6
-18.6667	-0.0897624	-0.127646	-0.115542	-0.194587	N/A	N/A
-16	-0.101354	-0.189032	-0.111788	-0.182965	N/A	N/A
-13.3333	-0.204998	-0.211622	-0.107028	-0.125756	-0.0604362	N/A
-10.6667	-0.273485	-0.220377	-0.142793	-0.133475	-0.105494	-0.24071
-8	-0.218558	-0.220969	-0.179669	-0.117074	-0.231614	-0.136703
-5.33333	-0.101	-0.253762	-0.153992	-0.0893886	-0.394159	-0.0635514
-2.66667	-0.0617958	-0.109499	-0.0667536	-0.0729792	-0.29171	0.0511549
1.3113e-06	0.29677	-0.0152836	0.269678	0.0410519	-0.0076293	0.144646
2.66667	0.78192	0.143517	0.555243	0.29396	0.364259	0.150464
5.33333	0.970512	0.311356	0.708498	0.447736	0.674472	0.293362
8	1.20593	0.573967	0.907818	0.592206	0.771558	0.537074
10.6667	1.74052	0.80115	1.30711	0.846534	1.16731	0.625338
13.3333	2.17501	1.36703	1.73083	1.07942	1.76542	0.905946
16	2.02025	1.81024	1.63595	1.32398	1.86881	1.30973
18.6667	1.68796	1.82021	1.53416	1.36266	1.87556	1.50257
21.3333	1.36366	1.63661	1.59807	1.16027	1.91618	1.48051
24	1.1795	1.51209	1.62945	1.06169	1.81735	1.43318
26.6667	1.01813	1.47659	1.65302	1.09608	1.6413	1.37266
29.3333	0.871212	1.34983	1.6099	1.12549	1.2701	1.21865
32	0.811524	1.10426	1.14538	0.971808	0.967404	1.10453
34.6667	0.81345	0.816408	0.824676	0.834312	0.765216	0.95169
37.3333	0.717534	0.592595	0.47338	0.74883	0.583132	0.773358
40	0.528788	0.540981	0.607506	0.714012	0.569864	0.756264
42.6667	0.509032	0.4376	0.327937	0.637554	0.554753	0.86616
45.3333	0.458654	0.239938	0.35162	0.533538	0.379505	0.776112
48	0.50758	0.0697926	0.322804	0.37195	0.256597	0.466352
50.6667	0.536317	0.130225	0.278716	0.343771	0.102602	0.379264
53.3333	0.30433	0.0456861	0.246713	0.298559	0.0275704	0.363742
56	-0.249819	0.112394	0.206051	0.396374	0.0125334	0.248034
58.6667	-0.041415	0.153371	0.348716	0.4081	-0.0895686	0.17281

## Sheet: B
Figure 1-figure supplement 1B			Timings of temporal landmarks for all sqhAX3; sqhGFP; GAP43-mCherry movies
	Time after GBE onset (mins)
Intercalation starts	-4	3	-3	-2	-5	-2
Ectodermal cell divisions	34.5	38.5	37.5	40.5	33	39
Intercalation ends	54	72	66	62	60	75

## Sheet: C
Figure 1-figure supplement 1C: Number of cells with Myosin II polarity data calculated vs time, 6 embryos pooled
Time after GBE onset (mins)	N
-20	413
-19.5	412
-19	413
-18.5	415
-18	417
-17.5	419
-17	423
-16.5	425
-16	427
-15.5	428
-15	468
-14.5	478
-14	482
-13.5	479
-13	644
-12.5	652
-12	660
-11.5	662
-11	664
-10.5	664
-10	666
-9.5	669
-9	675
-8.5	693
-8	693
-7.5	686
-7	691
-6.5	697
-6	697
-5.5	705
-5	690
-4.5	708
-4	705
-3.5	709
-3	711
-2.5	710
-2	715
-1.5	717
-1	744
-0.5	755
0	761
0.5	801
1	828
1.5	849
2	882
2.5	910
3	948
3.5	980
4	1015
4.5	1043
5	1071
5.5	1114
6	1151
6.5	1165
7	1193
7.5	1248
8	1273
8.5	1314
9	1333
9.5	1374
10	1410
10.5	1443
11	1483
11.5	1517
12	1533
12.5	1563
13	1574
13.5	1614
14	1621
14.5	1632
15	1670
15.5	1712
16	1738
16.5	1752
17	1773
17.5	1800
18	1824
18.5	1828
19	1849
19.5	1858
20	1874
20.5	1904
21	1932
21.5	1932
22	1947
22.5	1955
23	1948
23.5	1960
24	1961
24.5	1962
25	1969
25.5	1961
26	1999
26.5	2006
27	2002
27.5	2013
28	2021
28.5	2036
29	2023
29.5	2028
30	2056
30.5	2043
31	2044
31.5	2036
32	2024
32.5	2020
33	2009
33.5	2013
34	2033
34.5	2033
35	2021
35.5	2027
36	2017
36.5	2014
37	2004
37.5	2024
38	2041
38.5	2045
39	2032
39.5	2041
40	2046
40.5	2051
41	2026
41.5	2030
42	2035
42.5	2032
43	2040
43.5	2068
44	2082
44.5	2067
45	2059
45.5	2063
46	2059
46.5	2071
47	2073
47.5	2061
48	2067
48.5	2070
49	2073
49.5	2072
50	2084
50.5	2106
51	2109
51.5	2118
52	2115
52.5	2119
53	2122
53.5	2158
54	2176
54.5	2178
55	2172
55.5	2136
56	2149
56.5	2112
57	2088
57.5	2030
58	2034
58.5	2047
59	2065
59.5	2072
60	2073
