# Supplementary material for: Unipolar distributions of junctional Myosin II identify cell stripe boundaries that drive cell intercalation throughout Drosophila axis extension
Source: eLife journal article supplement (doi:10.7554/elife.12094), 2016-05-16
Supplement: supp [file elife-12094-supp-v1.zip › elife_poa_e12094_Figure_2_source_data_1.xlsx]

## Sheet: E
Figure 2E	PSB interface Myosin II f.i. vs Time
	PSB				-1				PSB vs -1	+1				PSB vs +1
Time after GBE onset (mins)	lower CI	Mean	upper CI	N	lower CI	Mean	upper CI	N	P-value	lower CI	Mean	upper CI	N	P-value
-20	1.37453	3.61965	5.86477	954	1.12292	3.18033	5.23775	825	0.549068	0.923786	2.96774	5.0117	810	0.11328
-19	1.45956	3.67944	5.89933	1197	1.16435	3.20983	5.2553	1037	0.00350434	0.956072	3.01086	5.06565	1022	0.00569034
-18	1.10755	3.10198	5.09641	1453	0.936055	2.77564	4.61522	1265	0.0114961	0.835568	2.68247	4.52936	1256	0.00843383
-17	1.14201	3.13904	5.13606	1706	0.93298	2.79082	4.64866	1494	0.16819	0.80243	2.64998	4.49753	1495	0.00378469
-16	2.51337	4.45705	6.40073	1853	2.07852	3.84712	5.61572	1633	0.0272416	1.86376	3.66902	5.47428	1653	0.0179604
-15	2.63869	4.64835	6.65801	2005	2.17105	4.03359	5.89613	1775	0.106376	1.90694	3.80952	5.7121	1797	0.142371
-14	2.85782	4.95123	7.04464	2148	2.32384	4.28328	6.24272	1916	0.130003	2.0751	4.07594	6.07678	1941	0.0233409
-13	3.08128	5.25954	7.4378	2286	2.48032	4.5066	6.53287	2054	0.000376112	2.27847	4.37228	6.46609	2094	0.000746497
-12	3.36316	5.6289	7.89464	2431	2.72716	4.83083	6.9345	2197	0.0234569	2.54411	4.69986	6.85561	2249	0.00181431
-11	3.66667	6.0421	8.41753	2560	2.98004	5.15968	7.33931	2329	0.00309753	2.79456	5.01822	7.24187	2381	0.00135935
-10	4.03035	6.45964	8.88894	2698	3.31644	5.53327	7.75009	2463	0.000393507	3.13734	5.39586	7.65438	2516	0.00257847
-9	4.36888	6.87869	9.3885	2724	3.6172	5.90354	8.18988	2487	0.00167117	3.45807	5.77817	8.09827	2545	0.00117534
-8	4.73699	7.32961	9.92223	2745	3.8672	6.20583	8.54446	2524	0.000212127	3.7816	6.13454	8.48749	2573	9.18e-05
-7	5.03365	7.67687	10.3201	2763	4.09633	6.48749	8.87864	2563	0.00362092	4.02649	6.42436	8.82223	2600	0.000257127
-6	5.40109	8.06898	10.7369	2784	4.35961	6.83	9.30039	2604	0.000440301	4.29148	6.80127	9.31106	2615	0.00306131
-5	5.77544	8.52027	11.2651	2814	4.65233	7.22012	9.78792	2657	4.8e-05	4.69407	7.31023	9.92639	2634	0.000339691
-4	6.24432	9.0793	11.9143	2864	5.00421	7.66848	10.3327	2728	0.000236996	5.17255	7.867	10.5614	2671	0.000573249
-3	6.87133	9.90064	12.93	2951	5.44659	8.34546	11.2443	2824	0.00249835	5.79726	8.66496	11.5327	2727	0.0450281
-2	7.71639	10.9221	14.1277	3053	6.16955	9.25763	12.3457	2962	0.00186779	6.59931	9.67389	12.7485	2832	0.178193
-1	8.64737	12.0649	15.4824	3172	6.86461	10.1484	13.4322	3117	9.66e-05	7.37485	10.6802	13.9856	2959	0.0158248
0	9.77394	13.4857	17.1974	3333	7.79563	11.4215	15.0473	3299	0.00169025	8.50961	12.1403	15.771	3100	0.0216497
1	10.8845	14.8865	18.8886	3522	8.77098	12.6865	16.602	3501	0.000110187	9.60683	13.5317	17.4567	3273	0.00737876
2	12.2733	16.6141	20.9549	3734	9.8953	14.1403	18.3854	3712	2.03e-07	10.765	14.9537	19.1424	3467	0.000346686
3	13.66	18.2817	22.9034	3960	11.0401	15.6712	20.3023	3927	0.000110607	12.0046	16.4853	20.9659	3650	0.0543738
4	15.028	19.962	24.8961	4170	12.2551	17.1262	21.9974	4130	0.000229576	13.2445	18.0668	22.889	3834	0.0526828
5	16.2274	21.4632	26.6991	4391	13.3948	18.6919	23.989	4319	4.89e-07	14.5146	19.5889	24.6632	4023	2.83e-05
6	17.5145	23.0797	28.6448	4604	14.7099	20.2939	25.878	4509	4.12e-05	15.8608	21.158	26.4552	4197	0.00245305
7	18.6578	24.5192	30.3806	4807	15.823	21.675	27.5269	4701	1.35e-06	16.9875	22.5131	28.0386	4386	0.00279207
8	20.0351	26.2288	32.4225	4979	16.9569	23.1548	29.3527	4894	0.00693225	18.1412	23.9865	29.8318	4566	0.00440696
9	21.0192	27.519	34.0188	5128	17.9693	24.5068	31.0442	5066	4.76e-05	19.0107	25.1183	31.2259	4720	0.00100199
10	22.089	28.893	35.697	5261	18.9602	25.7342	32.5083	5196	0.000139681	19.9478	26.3321	32.7164	4888	0.00353015
11	23.092	30.1074	37.1229	5365	19.6895	26.6976	33.7057	5311	1.23e-07	20.7156	27.3347	33.9539	5044	5.32e-05
12	24.1937	31.3705	38.5474	5462	20.404	27.5886	34.7731	5421	0.000247886	21.4356	28.2835	35.1313	5178	4.24e-06
13	25.2799	32.6041	39.9283	5540	21.2108	28.6198	36.0287	5503	1.49e-05	22.18	29.2828	36.3856	5317	0.000108624
14	26.3141	33.8042	41.2944	5600	21.9058	29.4882	37.0706	5560	1.4e-08	22.7343	30.0949	37.4555	5446	4.79e-06
15	27.2431	34.9375	42.6319	5653	22.4608	30.2037	37.9466	5578	1.27e-07	23.1884	30.7507	38.313	5560	4.46e-07
16	28.2249	36.0356	43.8463	5683	22.9641	30.9359	38.9078	5598	6.25e-09	23.7642	31.4741	39.184	5651	8.2e-07
17	29.279	37.3034	45.3279	5724	23.3246	31.5143	39.7041	5648	3.57e-10	24.1422	32.0377	39.9332	5711	7.89e-08
18	30.3537	38.6368	46.9199	5794	23.6677	32.0617	40.4556	5709	3.61e-14	24.3679	32.4164	40.4649	5797	3.33e-12
19	31.4037	39.9031	48.4025	5845	23.8412	32.3386	40.836	5742	7.87e-09	24.5165	32.7551	40.9937	5856	6.5e-12
20	32.4305	41.1006	49.7707	5900	23.8539	32.3843	40.9148	5777	6.8e-18	24.4793	32.8793	41.2792	5898	8.6e-17
21	33.6821	42.5995	51.5169	5924	24.0047	32.6571	41.3095	5784	2.89e-22	24.4039	32.9062	41.4085	5927	6.03e-25
22	34.7442	43.8136	52.8831	5959	24.1163	32.8358	41.5553	5803	8.99e-30	24.2567	32.8414	41.4261	5945	2.13e-26
23	35.9585	45.2295	54.5005	6016	24.1989	32.8532	41.5075	5818	1.4e-41	24.0427	32.7868	41.5308	5988	1.25e-32
24	36.7955	46.1362	55.4769	6033	24.1537	32.7743	41.395	5819	1.69e-41	23.6272	32.4552	41.2831	6051	1.21e-49
25	37.6432	47.1145	56.5857	6051	24.1785	32.7841	41.3897	5816	1.44e-46	23.3216	32.2013	41.0811	6056	6.69e-55
26	38.6171	48.2561	57.8951	6035	24.4468	33.2172	41.9875	5806	1.21e-51	23.0148	31.8732	40.7315	6054	8.23e-59
27	39.6345	49.4569	59.2793	6000	24.5508	33.4246	42.2985	5780	9.31e-50	22.6203	31.4524	40.2846	6059	7.88e-60
28	40.3503	50.3273	60.3043	5963	24.7868	33.7203	42.6537	5761	4.5e-55	22.3571	31.2124	40.0678	6035	1.65e-73
29	40.9867	51.1435	61.3004	5927	25.1712	34.112	43.0529	5737	5.27e-44	22.2688	31.0764	39.8841	5991	2.69e-83
30	41.616	51.9616	62.3072	5858	25.478	34.5342	43.5903	5708	5.92e-67	22.1651	30.824	39.4829	5940	2.52e-95
31	42.206	52.6911	63.1763	5801	25.9607	35.1048	44.249	5668	1.7e-57	22.1213	30.7634	39.4054	5881	2.09e-91
32	42.9135	53.4609	64.0082	5696	26.532	35.8041	45.0763	5607	3.47e-58	22.1574	30.7714	39.3854	5816	1.15e-94
33	43.3464	54.0025	64.6586	5609	27.0105	36.2886	45.5668	5529	9.01e-62	22.2841	31.0487	39.8134	5775	1.39e-113
34	43.8946	54.7865	65.6784	5516	27.7299	37.1053	46.4807	5454	9.87e-50	22.6007	31.4923	40.384	5728	3.26e-91
35	44.4178	55.4412	66.4645	5455	28.2036	37.6952	47.1868	5408	1.8e-50	22.9228	31.8389	40.7551	5717	1.12e-107
36	44.9537	56.05	67.1463	5387	28.7433	38.3792	48.0152	5358	4.45e-45	23.1579	32.2256	41.2933	5712	5.35e-85
37	45.1756	56.365	67.5545	5304	29.2625	39.0563	48.8501	5308	1.04e-55	23.4054	32.6715	41.9377	5710	1.32e-95
38	45.5769	56.9819	68.3869	5187	29.5971	39.4832	49.3694	5230	3.55e-53	23.6902	33.0125	42.3348	5674	1.17e-102
39	45.8705	57.4596	69.0486	5066	29.7147	39.6329	49.5512	5140	1.18e-49	23.7582	33.1367	42.5153	5639	2.21e-96
40	46.3499	57.9952	69.6406	4933	29.9638	39.912	49.8601	5054	8.67e-41	24.0138	33.3897	42.7655	5570	7.97e-92
41	46.1056	57.8313	69.5571	4800	29.9395	39.9706	50.0017	4965	3.15e-45	23.949	33.3686	42.7882	5493	1.59e-85
42	46.0096	57.8695	69.7294	4622	29.9423	40.0293	50.1162	4841	2.37e-52	23.892	33.3192	42.7464	5360	6.89e-106
43	45.7384	57.7527	69.7671	4449	29.4628	39.5956	49.7283	4689	7.11e-42	23.6967	33.0421	42.3876	5227	1.95e-83
44	45.5954	57.7146	69.8339	4314	29.2575	39.3632	49.4689	4548	8.06e-38	23.6903	32.8894	42.0885	5101	5.02e-75
45	45.3384	57.4765	69.6146	4198	29.0055	39.1656	49.3256	4433	1.51e-36	23.433	32.5835	41.7341	4977	2.86e-82
46	45.2843	57.5039	69.7234	4085	28.8854	39.0908	49.2962	4343	4.55e-41	23.485	32.6441	41.8032	4846	8.53e-77
47	44.8347	57.1931	69.5514	3961	28.6001	38.8929	49.1857	4249	4.52e-32	23.4241	32.5013	41.5785	4727	2.63e-73
48	44.9675	57.3481	69.7287	3834	28.6158	38.9109	49.2059	4124	1.39e-32	23.6	32.5564	41.5129	4619	1.44e-66
49	44.7013	57.0685	69.4356	3719	28.3055	38.5907	48.876	4022	1.36e-42	23.5212	32.4835	41.4458	4527	2.04e-73
50	44.3674	56.7179	69.0685	3598	28.3691	38.5967	48.8244	3918	4.18e-29	23.4889	32.4233	41.3577	4449	3.28e-54
51	44.3109	56.7007	69.0905	3471	28.2923	38.3921	48.4918	3790	3.93e-33	23.4807	32.4758	41.4708	4372	1.43e-61
52	44.7298	57.1376	69.5455	3317	28.5464	38.5414	48.5363	3628	7.43e-34	23.6256	32.5776	41.5297	4315	3.01e-59
53	44.5059	56.8503	69.1947	3154	28.688	38.6376	48.5871	3443	2.09e-31	23.5672	32.5122	41.4573	4268	2.98e-58
54	44.4367	56.6707	68.9047	2993	28.4916	38.3143	48.137	3232	2.86e-37	23.3047	32.1828	41.0609	4204	1.86e-59
55	43.9238	56.0444	68.165	2849	28.4299	38.1095	47.7892	3056	4.26e-39	23.1783	31.942	40.7057	4101	2.72e-78
56	43.67	55.7444	67.8187	2729	28.7887	38.2854	47.7822	2869	3.74e-35	23.1821	31.7994	40.4167	4017	4.07e-65
57	43.955	56.0446	68.1342	2439	28.9559	38.4281	47.9004	2553	2.62e-32	23.154	31.7509	40.3479	3667	8.64e-68
58	43.8443	55.8209	67.7974	1987	28.9115	38.4488	47.9861	2075	2.91e-33	22.9345	31.4564	39.9782	3055	7.54e-61
59	43.221	55.0655	66.9099	1579	28.7566	38.2854	47.8142	1643	2.39e-27	22.7641	31.2259	39.6878	2454	8.16e-65
60	42.6756	54.4823	66.2889	1201	28.7473	38.11	47.4727	1234	1.04e-18	22.745	31.0092	39.2733	1871	6.29e-36

## Sheet: H
Figure 2H	Analysis of vertex recoil after laser ablation in PSB and +1 interfaces
PSB Junctions
	Time (s)	-3.6526	-2.9221	-2.1916	-1.4611	-0.73053	0	0.73053	1.4611	2.1916	2.9221	3.6526	4.3832	5.1137	5.8442	6.5748	7.3053	8.0358	8.7664	9.4969	10.227	10.958	11.688	12.419	13.15	13.88	14.611	15.341	16.072	16.802	17.533	18.263	18.994	19.724	20.455	21.185	21.916	22.646	23.377	24.107	24.838	25.569	26.299	27.03	27.76	28.491	29.221	29.952
Embryo	Junction Number	Cumulative vertex distance change (µm)
1	1	-0.3272	-0.2454	-0.1636	-0.0818	0	-0.0096	-0.03	-0.0314	0.0709	0.153	0.187	0.1614	0.1359	0.1103	0.0975	0.1128	0.1282	0.1435	0.1588	0.1742	0.1401	0.0962	0.0584	0.076	0.0935	0.111	0.1285	0.1461	0.1636	0.1767	0.1767	0.1767	0.2083	0.2697	0.3311	0.3685	0.3992	0.4299	0.4605	0.4915	0.5125	0.5125	0.5235	0.5345	0.5405	0.5275	0.5135
2	1	-0.4821	-0.4003	-0.3185	-0.2045	0	0.0218	0.0218	0.0505	0.2345	0.4186	0.5898	0.7432	0.8966	1.1334	1.3713	1.5247	1.8805	2.1313	2.2865	2.4092	2.5319	2.6547	2.7774	2.9001	3.0228	3.1455	3.2682	3.3341	3.3996	3.465	3.5304	3.5959	3.6613
2	2	-0.1615	-0.1615	-0.1227	-0.0614	0	0.0065	0.0065	0.0065	0.0065	0.0065	0.0236	0.0645	0.1054	0.1741	0.2814	0.445	0.5508	0.7	0.8966	1.142	1.2848	1.4076	1.5301	1.6531	1.7311	1.7921	1.8541	1.9151	1.9761	2.0381	2.0991	2.1601	2.1901	2.1901	2.1901	2.1901	2.1901
3	1	-0.3098	-0.3098	-0.3098	-0.2454	0	0.1358	0.2585	0.3812	0.5039	0.6266	0.8006	1.037	1.0983	1.1597	1.2242	1.2958	1.3674	1.439	1.5147	1.6068	1.6731	1.7345	1.7958	1.8572	1.9335	2.0153	2.0971	2.2093	2.309	2.4011	2.4931	2.5308	2.5457	2.5457	2.5457	2.5775	2.6184	2.6602	2.7215
3	2	-0.1615	-0.1615	-0.1227	-0.0614	0	0.0065	0.0065	0.0447	0.2901	0.4873	0.6457	0.7714	0.9555	1.056	1.1174	1.1788	1.2208	1.2265	1.2061	1.1856	1.1823	1.1823	1.1863	1.2272	1.2681	1.309	1.3499	1.3503	1.3757	1.4166	1.4575	1.4984	1.5182	1.5182	1.5182	1.5182	1.5182	1.5182	1.5182	1.5182	1.5182	1.5182	1.5182	1.5182	1.5182	1.5182	1.5182
4	1	-0.6545	-0.4909	-0.3273	-0.1636	0	0.1636	0.3594	0.5843	0.8093	0.9228	1.006	1.0893	1.1726	1.2558	1.3372	1.4143	1.491	1.569	1.635	1.659	1.684	1.709	1.733	1.758	1.797	1.842	1.887	1.932	2	2.082	2.164	2.245	2.317	2.378	2.439	2.501	2.545	2.566	2.586	2.607	2.627	2.648	2.668	2.688	2.708	2.726	2.743
4	2	-0.2454	-0.184	-0.1227	-0.0613	0	0.0614	0.1656	0.3088	0.4519	0.7399	0.9731	1.0754	1.1776	1.2802	1.3822	1.4842	1.5292	1.5702	1.6022	1.6022	1.6022	1.6312	1.6922	1.7532	1.8152	1.8762	1.9372	1.9992	2.0602	2.1062	2.1062
5	1	0.0043	-0.0161	-0.0366	-0.0409	0	0.0591	0.1205	0.2423	0.6923	0.9491	1.128	1.2683	1.3542	1.4401	1.526	1.6119	1.64	1.6645	1.6882	1.7087	1.7291	1.7496	1.77	1.7905	1.8109	1.8314	1.8518	1.8694	1.8869	1.9044	1.922	1.9395	1.957	1.9745	1.9921	2.0096	2.02	2.02	2.02	2.02	2.02	2.02	2.02	2.02	2.02	2.02	2.02
6	1	-0.242	-0.201	-0.16	-0.103	0	0.065	0.127	0.188	0.249	0.391	0.521	0.602	0.684	0.732	0.75	0.741	0.732	0.722	0.713	0.703	0.694	0.684	0.675	0.665	0.656	0.647	0.637	0.628	0.618	0.601	0.561	0.529	0.498	0.468	0.437	0.43	0.43	0.43	0.43	0.43	0.43	0.43	0.407	0.383	0.358	0.334	0.309
6	2	-0.1679	-0.1679	-0.0905	0	0	0	0.0644	0.2062	0.4516	0.6488	0.7815	0.8449	0.9472	1.0494	1.1708	1.3344	1.4594	1.5294	1.56	1.5907
7	1	-0.3229	-0.2615	-0.2002	-0.1227	0	0.0679	0.1619	0.3129	0.6199	0.8779	1.0889	1.2499	1.3519	1.4539	1.5439	1.6049	1.6669	1.6929	1.6929	1.6929	1.6929	1.7069	1.7409	1.8019	1.8639	1.9249	1.9859	2.0579	2.0909	2.1009	2.1119	2.0859	2.0549	2.0289	2.0289	2.0289	2.0289	2.0299	2.0539	2.0989	2.1549	2.2099	2.2649	2.3199	2.3529	2.2909	2.2299
8	1	-0.077	-0.077	-0.077	-0.061	0	0.062	0.22	0.465	0.711	0.908	1.058	1.163	1.326	1.407	1.435	1.435	1.435	1.458	1.499	1.54	1.555	1.532	1.471	1.409	1.348	1.287	1.225	1.235	1.245	1.255	1.266	1.294	1.325	1.355	1.386	1.369	1.326	1.264	1.203	1.142	1.099	1.099	1.127	1.158	1.185	1.198	1.212
9	1	-0.33	-0.207	-0.123	-0.062	0	0.006	0.006	0.044	0.29	0.439	0.561	0.684	0.807	0.846	0.846	0.846	0.846	0.846	0.856	0.905	0.954	1.003	1.052	1.101	1.151	1.197	1.238	1.279	1.319	1.35	1.35	1.377	1.408	1.429	1.399	1.368
10	1	-0.168	-0.1066	-0.0453	0	0	0	0.0322	0.1126	0.2967	0.529	0.7146	0.8169	0.9191	0.9379	0.9238	0.9238	0.9816	1.0313	1.0471	0.9653	0.986	1.0078	1.0078	1.0078	1.0078	0.9842	0.9188	0.8533	0.7879	0.7173	0.6314	0.5455
11	1	-0.33	-0.269	-0.168	-0.062	0	0.17	0.322	0.445	0.568	0.69	0.805	0.904	0.945	0.986	1.027	1.068	1.108	1.149	1.187	1.211	1.236	1.289	1.375	1.461	1.532	1.589	1.629	1.67	1.737	1.818	1.9	1.982	2.034	2.059	2.083	2.108	2.133	2.157	2.182	2.19	2.19	2.19
12	1	0	0	0	0	0	0	0.3218	0.8685	1.0526	1.2366	1.4207	1.6047	1.7888	2.0146	2.2218	2.3445	2.4672	2.5371	2.5678	2.5985	2.6804	2.7725	2.8615	2.9228	2.9842	3.0382	3.0791	3.12	3.1609	3.1914	3.1914	3.1914	3.1914	3.1854	3.1445	3.1036	3.0727	3.058	3.0826	3.1071	3.1316	3.1562	3.1349	3.1104	3.0858	3.0613	3.0367
13	1	-0.6135	-0.4601	-0.3068	-0.1534	0	0.0438	0.1227	0.2552	0.4392	0.5262	0.5792	0.6232	0.7252	0.8282	0.9112	0.9522	0.9932	1.0332	1.0792	1.1402	1.2272	1.3002	1.3512	1.4022	1.4532	1.4932	1.5142	1.5342	1.5552	1.5742	1.5922	1.6232	1.6562	1.6892	1.7222	1.7542	1.7872	1.8202	1.8532
14	1	-0.3273	-0.2455	-0.1637	-0.0819	0	0.1183	0.2732	0.4477	0.5704	0.7414	0.9511	1.1905	1.3132	1.4359	1.5331	1.574	1.6149	1.6558	1.7009	1.7623	1.8236	1.8754	1.9163	1.9572	1.9981	2.0243	2.0243
15	1	-0.3876	-0.2649	-0.1422	-0.0409	0	0.1505	0.3785	0.6584	0.9039	1.101	1.2851	1.4651	1.5674	1.6696	1.7779	1.9009	2.0429	2.1859	2.3379	2.5219	2.7059	2.8279	2.8789	2.9299	2.9809
Plus 1 Junctions
	Time (s)	-3.6526	-2.9221	-2.1916	-1.4611	-0.73053	0	0.73053	1.4611	2.1916	2.9221	3.6526	4.3832	5.1137	5.8442	6.5748	7.3053	8.0358	8.7664	9.4969	10.227	10.958	11.688	12.419	13.15	13.88	14.611	15.341	16.072	16.802	17.533	18.263	18.994	19.724	20.455	21.185	21.916	22.646	23.377	24.107	24.838	25.569	26.299	27.03	27.76	28.491	29.221	29.952
Embryo	Junction Number	Cumulative vertex distance change (µm)
1	1	0	0	0	0	0	0.0365	0.0989	0.1807	0.2625	0.3363	0.4215	0.5258	0.6301	0.7344	0.8292	0.9028	0.9764	1.0313	1.0722	1.1131	1.154	1.1949	1.2334	1.2497	1.2661	1.2677	1.2432	1.2186	1.1941	1.1758	1.1758	1.1758	1.1758	1.1758	1.1758	1.1758	1.1507	1.0903	1.0535	1.0167	0.9799	0.9431	0.9826	1.0276	1.0678	1.0883	1.1087
2	1	-0.0517	-0.0517	-0.0517	-0.0409	0	0.0409	0.0818	0.1163	0.1163	0.1163	0.1163	0.1163	0.1163	0.1163	0.1163	0.1163	0.1163	0.1163	0.1121	0.0917	0.0712	0.0508	0.0303	0.0099	-0.0106	-0.0458	-0.1071	-0.209	-0.3113	-0.3993	-0.4453	-0.4913	-0.5373	-0.5833	-0.6293	-0.6412	-0.6434	-0.6456	-0.6478	-0.65	-0.6568	-0.6744	-0.6919	-0.7094	-0.7289	-0.7561	-0.7834
2	2	-0.286	-0.214	-0.143	-0.071	0	0.035	0.05	0.055	0.085	0.116	0.172	0.264	0.357	0.386	0.386	0.386	0.363	0.354	0.357	0.359	0.362	0.365	0.376	0.465	0.553	0.612	0.619	0.626	0.633	0.648	0.689	0.73	0.752	0.764	0.819	0.874	0.929	0.984	1.04	1.111	1.19	1.269	1.347	1.426	1.501	1.56	1.618
3	1	-0.3359	-0.2132	-0.0905	0	0	0	0.0322	0.0936	0.1549	0.168	0.1851	0.226	0.2669	0.3078	0.336	0.336	0.3649	0.3956	0.4262	0.4569	0.4876	0.5326	0.5939	0.6553	0.6898	0.7291	0.7945	0.86	0.9254	0.9883	1.0435	1.0987	1.1539	1.2091	1.2644	1.2957	1.3202	1.3463	1.4076	1.469
3	2	-0.1614	-0.1614	-0.1227	-0.0613	0	0.0614	0.0905	0.081	0.0196	0.0066	0.0066	0.0046	-0.0363	-0.0772	-0.0991	-0.0786	-0.0196	0.0066	0.0003	-0.0304	-0.0611	-0.0917	-0.1224	-0.1531	-0.1614	-0.1504	-0.1197	-0.089	-0.0583	-0.0276	0.003	0.0789	0.1608	0.2426	0.3244
4	1	-0.2454	-0.184	-0.1227	-0.0613	0	0.0614	0.171	0.3244	0.4778	0.607	0.7297	0.8505	0.9338	1.017	1.1003	1.1835	1.2668	1.3501	1.4333	1.5166	1.6084	1.6888	1.7543	1.8197	1.8553	1.8799	1.9044	1.9289	1.9535	1.978	2.0026	2.0271	2.0516
4	2	0.098	0.073	0.049	0.024	0	-0.025	-0.049	-0.07	-0.07	-0.049	-0.021	0.006	0.033	0.06	0.088	0.115	0.142	0.169	0.197	0.224	0.251	0.283	0.319	0.354	0.39	0.426	0.462	0.498	0.534	0.57	0.606	0.642	0.678	0.712	0.734	0.757	0.779	0.801	0.823	0.846	0.868	0.89	0.913	0.935	0.957	0.98	1.002
5	1	-0.1636	-0.1227	-0.0818	-0.0409	0	0.0592	0.1849	0.369	0.553	0.7049	0.8737	1.0742	1.1969	1.2848	1.3564	1.428	1.6345	1.8492	2.032	2.0904	2.1488	2.2072	2.2617	2.2792	2.2967	2.3143	2.3318
6	1	0.0906	0.0292	-0.0321	-0.0613	0	0.0614	0.1228	0.1841	0.2455	0.4034	0.5874	0.7697	0.9169	1.0224	1.1083	1.1942	1.3379	1.45	1.5309	1.5922	1.7049	1.818	1.9203	2.0225	2.1248
6	2	0	0	0	0	0	0	0.0322	0.1126	0.2967	0.529	0.8257	1.1758	1.1758	1.1966	1.2273	1.258	1.2887	1.3193	1.3437	1.3437	1.3437	1.358	1.3887	1.4194	1.4501
7	1	-0.1679	-0.1066	-0.0452	0	0	0	0	0	0	0	0	0	0	0	0	0	-0.0192	-0.0397	-0.0601	-0.0806	-0.101	-0.1024	-0.0819	-0.0615	-0.0261	0.0111	0.0418	0.0725	0.1031	0.1338	0.1645	0.168	0.168	0.168	0.168	0.1544	0.1368	0.1193	0.1018	0.0843	0.0667	0.0492	0.0317	0.0141	0	0	0.0203
8	1	-0.6588	-0.4134	-0.2455	-0.1228	0	0.0678	0.1614	0.2841	0.4068	0.5295	0.6437	0.7429	0.7838	0.8247	0.8529	0.8529	0.8529	0.8529	0.8403	0.779	0.7176	0.6849	0.6849	0.6849	0.7073	0.738	0.7686	0.7819	0.7951	0.8004	0.7829	0.7654
9	1	-0.3359	-0.2132	-0.0905	0	0	0	0.0322	0.0936	0.1549	0.168	0.168	0.168	0.168	0.168	0.168	0.168	0.2066	0.2475	0.2884	0.3293	0.336	0.3646	0.426	0.4873	0.504	0.504	0.504	0.504	0.504	0.5117	0.5424	0.6274	0.7194	0.8024	0.8331	0.8399	0.8399	0.8399	0.8399
10	1	0	0	0	0	0	0	0	0.0095	0.0709	0.2288	0.3359	0.3359	0.3359	0.3637	0.4046	0.4455	0.4864	0.5215	0.5522	0.5828	0.6135	0.6442	0.6743	0.6988	0.7233	0.7479	0.7727	0.7967	0.8217	0.8447	0.8657	0.8857	0.9067	0.9267	0.9477	0.9677	0.9877	1.0087	1.0397	1.0707	1.1007	1.1317	1.1627	1.1757	1.1757	1.1757	1.1757
11	1	0.091	0.03	-0.032	-0.061	0	-0.048	-0.045	0.017	0.078	0.091	0.091	0.091	0.091	0.091	0.101	0.131	0.162	0.193	0.223	0.254	0.319	0.39	0.462	0.534	0.539	0.516	0.482	0.448	0.414	0.381	0.347	0.356	0.372	0.387	0.403	0.418	0.427	0.427	0.427	0.427	0.427	0.427	0.427	0.437	0.454	0.472	0.489
12	1	-0.1981	-0.0754	-0.0043	0.0205	0	-0.0204	0.002	0.0634	0.1247	0.2344	0.3571	0.4798	0.6025	0.7252	0.832	0.9036	0.9751	1.0467	1.135	1.2884	1.3051	1.2948	1.2846	1.2744	1.294	1.3136	1.3136	1.3136	1.2881	1.2472	1.2063	1.1654	1.1193	1.0681	1.017	0.9659	0.9482	0.9812	1.0671	1.1529	1.211	1.2048	1.1987	1.1926	1.1816	1.1509	1.0441
13	1	0	0	0	0	0	0.1096	0.1358	0.0935	0.1549	0.2162	0.2776	0.3389	0.4003	0.4616	0.523	0.5843	0.6168	0.6123	0.5816	0.5509	0.5715	0.6165	0.6759	0.7168	0.7577	0.7837	0.7837	0.7433	0.7024	0.6615	0.6206	0.5797	0.5388	0.5189	0.6212	0.7234	0.8007	0.8397	0.8397	0.8397	0.8397	0.8397	0.8397	0.8397	0.8397	0.8397
14	1	-0.1548	-0.1548	-0.1548	-0.1227	0	0.0131	0.0775	0.2193	0.4647	0.7101	0.9213	1.085	1.2486	1.4122	1.5471	1.6187	1.6903	1.7619	1.8251	1.8558	1.8608	1.8608	1.8584	1.8338	1.8093	1.7848	1.7602	1.7357	1.7111	1.6928	1.6928	1.7471	1.7926	1.8143	1.7836	1.7529	1.7223
15	1	-0.168	-0.0453	0	0	0	0.1096	0.2162	0.3083	0.4003	0.5406	0.6683	0.7588	0.8207	0.8397	0.8397	0.8397	0.8787	0.9197	0.9597	1.0007	1.0077	1.0077	1.0077	1.0077	1.0077	0.9927	0.9517	0.9117	0.8707	0.8397	0.8397	0.8397	0.8397	0.8397	0.8397	0.8637	0.8947	0.9247	0.9557	1.0137	1.0667	1.0767	1.0877	1.0747	1.0437	1.0127	1.0077

## Sheet: I Statistics
Figure 2I - Statistical analysis
Linear Regression					Equal Slopes Test
	PSB	+1			F	12.095
Best-fit values					DFn	1
Slope	0.2245 ± 0.02665	0.1084 ± 0.02010			DFd	186
Y-intercept when X=0.0	-0.01574 ± 0.06458	-0.01718 ± 0.04870			p	0.0006
X-intercept when Y=0.0	0.0701	0.1584
1/slope	4.454	9.222
95% Confidence Intervals
Slope	0.1715 to 0.2776	0.06846 to 0.1484
Y-intercept when X=0.0	-0.1442 to 0.1127	-0.1140 to 0.07968
X-intercept when Y=0.0	-0.6420 to 0.5317	-1.121 to 0.7980
Goodness of Fit
R square	0.4328	0.2384
Sy.x	0.2684	0.2024
Is slope significantly non-zero?
F	70.96	29.11
DFn, DFd	1.000, 93.00	1.000, 93.00
P value	< 0.0001	< 0.0001
Deviation from zero?	Significant	Significant
Data
Number of X values	5	5
Maximum number of Y replicates	19	19
Total number of values	95	95
Number of missing values	0	0
Runs test
Points above line	3	2
Points below line	2	3
Number of runs	4	3
P value (runs test)	0.9	0.5
Deviation from linearity	Not Significant	Not Significant
Equation	Y = 0.2245*X - 0.01574	Y = 0.1084*X - 0.01718

## Sheet: K
Figure 2K	Interface alignment analysis over time for PSB, +1 and -1 interfaces in eve-EGFP, GAP43-mCherry embryos
Data Points					LOWESS
Time after GBE onset (mins)	PSB	+1	-1		Time after GBE onset (mins)	PSB	+1	-1
-20	0.489796	0.465116	0.473684		-20	0.47955	0.497228	0.430928
-19.5	0.480769	0.538462	0.45		-19.8756	0.477753	0.499044	0.429048
-19	0.422222	0.525	0.421053		-19.7512	0.475957	0.50086	0.427167
-18.5	0.5	0.5	0.394737		-19.6268	0.47416	0.502675	0.425286
-18	0.44898	0.456522	0.394737		-19.5023	0.472363	0.504491	0.423405
-17.5	0.5	0.444445	0.416667		-19.3779	0.470914	0.50247	0.423313
-17	0.44898	0.488372	0.486486		-19.2535	0.469471	0.500376	0.423256
-16.5	0.44	0.488889	0.432432		-19.1291	0.468028	0.498282	0.423198
-16	0.45098	0.568182	0.5		-19.0047	0.466585	0.496187	0.42314
-15.5	0.477273	0.488889	0.5		-18.8803	0.467217	0.494888	0.424296
-15	0.431373	0.466667	0.444445		-18.7558	0.467931	0.493619	0.425499
-14.5	0.387755	0.489362	0.421053		-18.6314	0.468644	0.49235	0.426702
-14	0.45283	0.44898	0.473684		-18.507	0.469358	0.491082	0.427905
-13.5	0.436364	0.510204	0.421053		-18.3826	0.467896	0.490626	0.42973
-13	0.480769	0.456522	0.447368		-18.2582	0.466305	0.490218	0.431592
-12.5	0.54	0.5	0.45946		-18.1337	0.464713	0.489811	0.433454
-12	0.509804	0.458333	0.487179		-18.0093	0.463122	0.489404	0.435316
-11.5	0.529412	0.478261	0.512821		-17.8849	0.46302	0.489882	0.437019
-11	0.470588	0.458333	0.5		-17.7605	0.463039	0.490432	0.438709
-10.5	0.528302	0.489796	0.476191		-17.6361	0.463058	0.490982	0.440398
-10	0.557692	0.479167	0.473684		-17.5117	0.463078	0.491532	0.442088
-9.5	0.52	0.489362	0.45		-17.3873	0.462416	0.492127	0.443312
-9	0.566038	0.530612	0.512821		-17.2628	0.461683	0.492726	0.444487
-8.5	0.592593	0.531915	0.463415		-17.1384	0.46095	0.493326	0.445662
-8	0.574074	0.531915	0.465116		-17.014	0.460217	0.493925	0.446837
-7.5	0.566038	0.521739	0.386364		-16.8896	0.460585	0.493726	0.446957
-7	0.615385	0.5	0.512195		-16.7652	0.461092	0.493426	0.446943
-6.5	0.527273	0.553191	0.409091		-16.6408	0.461599	0.493126	0.446929
-6	0.545455	0.533333	0.439024		-16.5163	0.462107	0.492826	0.446914
-5.5	0.596491	0.5	0.44186		-16.3919	0.462941	0.492519	0.447741
-5	0.566667	0.529412	0.410256		-16.2675	0.463824	0.492211	0.448695
-4.5	0.607143	0.520833	0.547619		-16.1431	0.464707	0.491903	0.449649
-4	0.581818	0.52	0.55		-16.0187	0.465591	0.491595	0.450602
-3.5	0.6	0.574468	0.461539		-15.8942	0.466519	0.490335	0.450738
-3	0.631579	0.479167	0.425		-15.7698	0.467455	0.488907	0.45073
-2.5	0.622641	0.604651	0.473684		-15.6454	0.468391	0.487479	0.450721
-2	0.603774	0.555556	0.409091		-15.521	0.469326	0.486051	0.450713
-1.5	0.581818	0.568182	0.538462		-15.3966	0.470126	0.485648	0.450729
-1	0.557377	0.577778	0.409091		-15.2722	0.470898	0.485454	0.450751
-0.5	0.619048	0.574074	0.489362		-15.1478	0.47167	0.48526	0.450773
0	0.621212	0.589286	0.48		-15.0233	0.472443	0.485065	0.450794
0.5	0.615385	0.566667	0.5		-14.8989	0.473883	0.485208	0.451415
1	0.619048	0.627119	0.490909		-14.7745	0.475477	0.485429	0.452174
1.5	0.614286	0.646154	0.473684		-14.6501	0.477072	0.48565	0.452933
2	0.694444	0.626667	0.555556		-14.5257	0.478666	0.48587	0.453692
2.5	0.72	0.635135	0.584615		-14.4012	0.480877	0.485936	0.454667
3	0.670732	0.62963	0.534247		-14.2768	0.483249	0.485961	0.455697
3.5	0.659341	0.636364	0.592105		-14.1524	0.485621	0.485986	0.456727
4	0.641304	0.625	0.530864		-14.028	0.487993	0.486011	0.457757
4.5	0.639175	0.655172	0.536585		-13.9036	0.489831	0.486535	0.458197
5	0.628866	0.56383	0.529412		-13.7792	0.491513	0.487206	0.458465
5.5	0.632653	0.602041	0.568182		-13.6547	0.493196	0.487876	0.458733
6	0.61	0.583333	0.505882		-13.5303	0.494879	0.488546	0.459001
6.5	0.617647	0.56	0.510638		-13.4059	0.496833	0.488685	0.459733
7	0.640777	0.598039	0.531915		-13.2815	0.498876	0.488652	0.460615
7.5	0.613208	0.59596	0.541667		-13.1571	0.500918	0.48862	0.461497
8	0.59633	0.579439	0.520833		-13.0327	0.50296	0.488587	0.462379
8.5	0.587719	0.596154	0.495238		-12.9082	0.504673	0.489137	0.462952
9	0.594595	0.598131	0.50495		-12.7838	0.506269	0.489895	0.463416
9.5	0.57265	0.596154	0.484849		-12.6594	0.507865	0.490652	0.463879
10	0.516129	0.590476	0.484536		-12.535	0.50946	0.49141	0.464342
10.5	0.534483	0.528302	0.490196		-12.4106	0.510571	0.491818	0.464628
11	0.559322	0.54386	0.54		-12.2862	0.511493	0.49209	0.464845
11.5	0.554622	0.508475	0.480769		-12.1617	0.512414	0.492361	0.465062
12	0.516129	0.520325	0.46789		-12.0373	0.513335	0.492632	0.465279
12.5	0.521368	0.528926	0.425926		-11.9129	0.514591	0.493334	0.465196
13	0.544716	0.512821	0.477064		-11.7885	0.515991	0.49422	0.464984
13.5	0.492188	0.462185	0.407407		-11.6641	0.51739	0.495107	0.464773
14	0.491667	0.474576	0.481818		-11.5397	0.518789	0.495993	0.464561
14.5	0.508065	0.426229	0.388889		-11.4152	0.520065	0.496749	0.464101
15	0.519685	0.428571	0.470588		-11.2908	0.521282	0.497442	0.463524
15.5	0.495868	0.406504	0.41		-11.1664	0.5225	0.498136	0.462948
16	0.483333	0.435484	0.37037		-11.042	0.523717	0.498829	0.462371
16.5	0.468254	0.475806	0.391304		-10.9176	0.525499	0.499741	0.461903
17	0.52	0.465649	0.392523		-10.7932	0.527568	0.500765	0.461489
17.5	0.463415	0.458015	0.357798		-10.6687	0.529638	0.501789	0.461076
18	0.521368	0.407692	0.382609		-10.5443	0.531707	0.502813	0.460663
18.5	0.51145	0.463235	0.432432		-10.4199	0.533347	0.503611	0.460457
19	0.508197	0.446043	0.390909		-10.2955	0.534748	0.504285	0.460366
19.5	0.496124	0.374101	0.446429		-10.1711	0.53615	0.504958	0.460274
20	0.547619	0.390071	0.415254		-10.0467	0.537551	0.505632	0.460183
20.5	0.554688	0.426471	0.441667		-9.92224	0.538752	0.506436	0.460118
21	0.581395	0.439716	0.432203		-9.79782	0.539833	0.507317	0.46007
21.5	0.547619	0.484615	0.451327		-9.67341	0.540913	0.508199	0.460021
22	0.564516	0.469231	0.432		-9.54899	0.541993	0.50908	0.459973
22.5	0.536	0.421053	0.462185		-9.42457	0.54341	0.509932	0.460113
23	0.574803	0.440298	0.448276		-9.30016	0.545047	0.510764	0.460377
23.5	0.555556	0.419847	0.470588		-9.17574	0.546684	0.511596	0.46064
24	0.520325	0.413534	0.409836		-9.05132	0.54832	0.512428	0.460904
24.5	0.581967	0.4	0.422764		-8.9269	0.54963	0.512989	0.460678
25	0.608	0.440945	0.418605		-8.80249	0.550709	0.513359	0.460107
25.5	0.555556	0.424242	0.40625		-8.67807	0.551789	0.51373	0.459536
26	0.585938	0.412587	0.366667		-8.55365	0.552868	0.5141	0.458966
26.5	0.608333	0.402878	0.349594		-8.42924	0.553749	0.514502	0.458746
27	0.582609	0.413044	0.370968		-8.30482	0.554478	0.514927	0.458793
27.5	0.605042	0.414286	0.393443		-8.1804	0.555207	0.515353	0.45884
28	0.593496	0.381945	0.448276		-8.05599	0.555936	0.515778	0.458886
28.5	0.586777	0.42069	0.467213		-7.93157	0.556789	0.516246	0.458912
29	0.59322	0.438356	0.439655		-7.80715	0.557742	0.516748	0.458921
29.5	0.585366	0.410959	0.436975		-7.68274	0.558696	0.51725	0.458929
30	0.606299	0.363057	0.422414		-7.55832	0.55965	0.517752	0.458938
30.5	0.601626	0.417722	0.448276		-7.4339	0.560654	0.518368	0.459503
31	0.626016	0.416107	0.431034		-7.30949	0.561703	0.519087	0.46056
31.5	0.637931	0.361702	0.474576		-7.18507	0.562753	0.519805	0.461618
32	0.603175	0.389262	0.5		-7.06065	0.563802	0.520523	0.462675
32.5	0.632479	0.411347	0.421488		-6.93624	0.564511	0.521435	0.4629
33	0.650406	0.425532	0.473684		-6.81182	0.564895	0.522531	0.462331
33.5	0.626087	0.398649	0.469565		-6.6874	0.565279	0.523628	0.461762
34	0.648	0.40411	0.512605		-6.56299	0.565663	0.524724	0.461193
34.5	0.654867	0.373333	0.473684		-6.43857	0.566615	0.525524	0.461303
35	0.661017	0.395833	0.474138		-6.31415	0.56815	0.526019	0.462111
35.5	0.723214	0.370629	0.452991		-6.18973	0.569685	0.526514	0.462919
36	0.675439	0.402685	0.482759		-6.06532	0.57122	0.527009	0.463727
36.5	0.682243	0.408759	0.460177		-5.9409	0.572657	0.527676	0.464381
37	0.669643	0.35	0.5		-5.81649	0.573987	0.528533	0.464865
37.5	0.666667	0.316547	0.465116		-5.69207	0.575317	0.52939	0.465349
38	0.65	0.369863	0.529412		-5.56765	0.576646	0.530247	0.465832
38.5	0.617886	0.337931	0.518797		-5.44323	0.577691	0.531364	0.46634
39	0.652893	0.372414	0.458015		-5.31882	0.578395	0.532792	0.466877
39.5	0.652542	0.409396	0.464912		-5.1944	0.5791	0.53422	0.467414
40	0.680672	0.398601	0.472441		-5.06998	0.579804	0.535648	0.46795
40.5	0.692308	0.443662	0.496		-4.94557	0.580714	0.536972	0.468731
41	0.666667	0.425532	0.527559		-4.82115	0.581888	0.538163	0.469825
41.5	0.703704	0.447761	0.483871		-4.69673	0.583063	0.539354	0.47092
42	0.702703	0.492537	0.481203		-4.57232	0.584237	0.540544	0.472014
42.5	0.700855	0.425373	0.472441		-4.4479	0.585234	0.541842	0.472416
43	0.732143	0.421053	0.488189		-4.32348	0.585986	0.54329	0.471856
43.5	0.691589	0.472	0.480916		-4.19907	0.586738	0.544737	0.471295
44	0.776699	0.457364	0.442748		-4.07465	0.587489	0.546184	0.470735
44.5	0.698113	0.476923	0.445312		-3.95023	0.588419	0.547695	0.470209
45	0.699029	0.518797	0.507246		-3.82582	0.589616	0.549301	0.469736
45.5	0.678899	0.471429	0.473282		-3.7014	0.590813	0.550906	0.469262
46	0.707547	0.507246	0.458647		-3.57698	0.59201	0.552512	0.468789
46.5	0.682243	0.437086	0.470149		-3.45257	0.593158	0.553893	0.468812
47	0.696429	0.422819	0.507692		-3.32815	0.594226	0.554909	0.469643
47.5	0.72807	0.50641	0.481203		-3.20373	0.595295	0.555925	0.470473
48	0.675	0.466667	0.462687		-3.07931	0.596364	0.55694	0.471304
48.5	0.713044	0.438356	0.473282		-2.9549	0.597309	0.558454	0.472371
49	0.649123	0.442953	0.443609		-2.83048	0.598038	0.560843	0.473853
49.5	0.637931	0.453333	0.42446		-2.70607	0.598766	0.563233	0.475336
50	0.657658	0.438356	0.5		-2.58165	0.599494	0.565622	0.476818
50.5	0.666667	0.442308	0.473684		-2.45723	0.600274	0.567478	0.478133
51	0.704348	0.443662	0.5		-2.33282	0.601155	0.568313	0.479127
51.5	0.660377	0.460432	0.491228		-2.2084	0.602035	0.569148	0.480122
52	0.633027	0.41844	0.46789		-2.08398	0.602915	0.569982	0.481116
52.5	0.685714	0.440945	0.455357		-1.95956	0.603879	0.571034	0.48243
53	0.666667	0.412698	0.419048		-1.83515	0.605017	0.572538	0.484406
53.5	0.670103	0.470149	0.509091		-1.71073	0.606155	0.574041	0.486382
54	0.676768	0.449612	0.444445		-1.58631	0.607293	0.575544	0.488358
54.5	0.708333	0.43609	0.453782		-1.4619	0.608516	0.576997	0.489842
55	0.636364	0.418605	0.486957		-1.33748	0.609932	0.578335	0.49021
55.5	0.660377	0.469231	0.482759		-1.21306	0.611349	0.579673	0.490578
56	0.666667	0.460938	0.466667		-1.08865	0.612765	0.581011	0.490947
56.5	0.676471	0.415385	0.461539		-0.96423	0.614267	0.582301	0.491816
57	0.678571	0.43299	0.424242		-0.839813	0.615984	0.583468	0.493929
57.5	0.675	0.46	0.473684		-0.715396	0.6177	0.584636	0.496042
58	0.7875	0.425926	0.425532		-0.590979	0.619417	0.585804	0.498155
58.5	0.7375	0.375	0.483871		-0.466563	0.620905	0.586965	0.499999
59	0.705128	0.464647	0.468085		-0.342146	0.62177	0.588111	0.501109
59.5	0.648649	0.432692	0.516854		-0.217729	0.622636	0.589256	0.502219
60	0.670732	0.438775	0.533333		-0.0933123	0.623501	0.590402	0.503328
					0.0311045	0.62434	0.591477	0.504471
					0.155521	0.625102	0.592338	0.505715
					0.279938	0.625863	0.593199	0.506959
					0.404355	0.626625	0.59406	0.508202
					0.528772	0.627383	0.59497	0.509384
					0.653188	0.628135	0.59604	0.510362
					0.777605	0.628886	0.59711	0.51134
					0.902022	0.629637	0.59818	0.512317
					1.02644	0.630357	0.599062	0.513315
					1.15086	0.630963	0.599245	0.514387
					1.27527	0.63157	0.599429	0.515459
					1.39969	0.632176	0.599613	0.516531
					1.52411	0.632774	0.599727	0.51764
					1.64852	0.63334	0.59955	0.518907
					1.77294	0.633905	0.599372	0.520173
					1.89736	0.63447	0.599194	0.52144
					2.02177	0.634827	0.599043	0.522507
					2.14619	0.634202	0.599019	0.522634
					2.27061	0.633577	0.598995	0.52276
					2.39502	0.632952	0.598971	0.522886
					2.51944	0.632243	0.598915	0.522934
					2.64386	0.631078	0.598687	0.522555
					2.76827	0.629913	0.59846	0.522176
					2.89269	0.628748	0.598232	0.521798
					3.01711	0.62764	0.597999	0.521492
					3.14153	0.626895	0.597737	0.521644
					3.26594	0.626149	0.597475	0.521796
					3.39036	0.625404	0.597213	0.521948
					3.51478	0.62465	0.596926	0.521995
					3.63919	0.623835	0.596449	0.521262
					3.76361	0.623021	0.595972	0.52053
					3.88802	0.622206	0.595495	0.519797
					4.01244	0.621394	0.595018	0.519131
					4.13686	0.620604	0.594537	0.519073
					4.26128	0.619814	0.594057	0.519014
					4.38569	0.619024	0.593576	0.518955
					4.51011	0.618219	0.59305	0.518881
					4.63453	0.617249	0.591992	0.51863
					4.75894	0.616278	0.590935	0.518379
					4.88336	0.615308	0.589878	0.518128
					5.00778	0.614333	0.588885	0.517875
					5.13219	0.613295	0.588848	0.517585
					5.25661	0.612257	0.588812	0.517295
					5.38103	0.611219	0.588776	0.517005
					5.50544	0.610171	0.58871	0.516686
					5.62986	0.608894	0.588007	0.515732
					5.75428	0.607617	0.587304	0.514779
					5.87869	0.606341	0.586602	0.513826
					6.00311	0.605067	0.5859	0.512888
					6.12753	0.60391	0.585254	0.512587
					6.25195	0.602753	0.584609	0.512287
					6.37636	0.601596	0.583963	0.511986
					6.50078	0.600437	0.583318	0.511684
					6.62519	0.599014	0.58279	0.511177
					6.74961	0.59759	0.582263	0.510669
					6.87403	0.596166	0.581735	0.510161
					6.99845	0.594743	0.581207	0.509654
					7.12286	0.592856	0.57998	0.508716
					7.24728	0.590963	0.578744	0.507772
					7.3717	0.589071	0.577508	0.506829
					7.49611	0.587178	0.576273	0.505885
					7.62053	0.585489	0.57483	0.504662
					7.74495	0.583808	0.57338	0.503429
					7.86936	0.582126	0.571931	0.502197
					7.99378	0.580444	0.570481	0.500965
					8.1182	0.578856	0.569	0.499842
					8.24261	0.577273	0.567517	0.498725
					8.36703	0.575689	0.566034	0.497608
					8.49145	0.574106	0.564551	0.496491
					8.61586	0.572527	0.562635	0.495544
					8.74028	0.570948	0.560685	0.494609
					8.8647	0.569369	0.558736	0.493675
					8.98911	0.56779	0.556787	0.49274
					9.11353	0.566033	0.554604	0.491547
					9.23795	0.564258	0.552398	0.490329
					9.36237	0.562484	0.550193	0.489111
					9.48678	0.560709	0.547987	0.487894
					9.6112	0.559109	0.545627	0.486769
					9.73561	0.557529	0.54325	0.485656
					9.86003	0.55595	0.540872	0.484542
					9.98445	0.55437	0.538494	0.483429
					10.1089	0.553384	0.536035	0.48218
					10.2333	0.552484	0.533565	0.480913
					10.3577	0.551584	0.531094	0.479644
					10.4821	0.550684	0.528624	0.478377
					10.6065	0.549554	0.526741	0.476912
					10.7309	0.548384	0.524957	0.475415
					10.8554	0.547215	0.523173	0.473917
					10.9798	0.546046	0.521388	0.47242
					11.1042	0.544587	0.519358	0.470249
					11.2286	0.543072	0.51728	0.467948
					11.353	0.541558	0.515201	0.465647
					11.4774	0.540043	0.513123	0.463345
					11.6019	0.538572	0.511368	0.461577
					11.7263	0.537111	0.509684	0.459926
					11.8507	0.53565	0.508	0.458276
					11.9751	0.534189	0.506316	0.456625
					12.0995	0.533149	0.504456	0.455058
					12.224	0.532215	0.502552	0.453511
					12.3484	0.53128	0.500647	0.451964
					12.4728	0.530346	0.498743	0.450418
					12.5972	0.529404	0.496687	0.44929
					12.7216	0.52846	0.494588	0.44828
					12.846	0.527516	0.492489	0.44727
					12.9704	0.526572	0.49039	0.44626
					13.0949	0.525457	0.488391	0.444753
					13.2193	0.524288	0.486423	0.443092
					13.3437	0.523118	0.484456	0.44143
					13.4681	0.521949	0.482488	0.439769
					13.5925	0.521381	0.480982	0.438823
					13.717	0.52102	0.479636	0.438125
					13.8414	0.52066	0.47829	0.437427
					13.9658	0.520299	0.476944	0.436729
					14.0902	0.52006	0.475484	0.43538
					14.2146	0.519867	0.47398	0.433782
					14.339	0.519674	0.472477	0.432185
					14.4634	0.519481	0.470973	0.430588
					14.5879	0.519253	0.469951	0.429916
					14.7123	0.519011	0.469129	0.42963
					14.8367	0.518769	0.468308	0.429345
					14.9611	0.518528	0.467487	0.429059
					15.0855	0.518287	0.466701	0.428115
					15.2099	0.518047	0.465932	0.426872
					15.3344	0.517806	0.465163	0.425629
					15.4588	0.517566	0.464393	0.424386
					15.5832	0.517637	0.463882	0.423747
					15.7076	0.517862	0.4635	0.423407
					15.832	0.518086	0.463117	0.423068
					15.9565	0.518311	0.462734	0.422728
					16.0809	0.518741	0.462166	0.422821
					16.2053	0.519283	0.461497	0.423147
					16.3297	0.519825	0.460828	0.423473
					16.4541	0.520367	0.46016	0.423799
					16.5785	0.521123	0.459195	0.424041
					16.703	0.522004	0.458056	0.424234
					16.8274	0.522885	0.456917	0.424426
					16.9518	0.523767	0.455777	0.424619
					17.0762	0.524308	0.454737	0.42487
					17.2006	0.524634	0.453758	0.425157
					17.325	0.524961	0.45278	0.425445
					17.4495	0.525287	0.451801	0.425733
					17.5739	0.526127	0.450894	0.426348
					17.6983	0.52732	0.450037	0.427188
					17.8227	0.528513	0.449179	0.428028
					17.9471	0.529706	0.448322	0.428868
					18.0715	0.530535	0.447861	0.429563
					18.196	0.531094	0.447693	0.430151
					18.3204	0.531653	0.447526	0.430738
					18.4448	0.532212	0.447358	0.431326
					18.5692	0.532902	0.446797	0.431556
					18.6936	0.533698	0.445921	0.431499
					18.818	0.534493	0.445045	0.431443
					18.9425	0.535288	0.44417	0.431387
					19.0669	0.536168	0.44341	0.431601
					19.1913	0.53712	0.44275	0.432049
					19.3157	0.538072	0.44209	0.432497
					19.4401	0.539024	0.44143	0.432945
					19.5645	0.54012	0.441263	0.432978
					19.689	0.54135	0.441554	0.432624
					19.8134	0.54258	0.441846	0.432271
					19.9378	0.54381	0.442137	0.431917
					20.0622	0.544757	0.442336	0.43172
					20.1866	0.545421	0.442441	0.43168
					20.311	0.546085	0.442545	0.43164
					20.4355	0.546749	0.442651	0.4316
					20.5599	0.547408	0.442526	0.431359
					20.6843	0.548063	0.442152	0.4309
					20.8087	0.548718	0.441779	0.430441
					20.9331	0.549372	0.441405	0.429982
					21.0575	0.549894	0.440944	0.42956
					21.182	0.550261	0.440381	0.429183
					21.3064	0.550627	0.439819	0.428806
					21.4308	0.550993	0.439256	0.428428
					21.5552	0.551578	0.438422	0.427935
					21.6796	0.552436	0.437248	0.427297
					21.8041	0.553294	0.436074	0.426658
					21.9285	0.554153	0.434899	0.42602
					22.0529	0.554934	0.433797	0.425495
					22.1773	0.555613	0.432793	0.425124
					22.3017	0.556291	0.431789	0.424753
					22.4261	0.556969	0.430785	0.424382
					22.5506	0.557813	0.430029	0.423861
					22.675	0.558901	0.429636	0.423121
					22.7994	0.559988	0.429243	0.422381
					22.9238	0.561076	0.42885	0.42164
					23.0482	0.561978	0.428354	0.420982
					23.1726	0.562587	0.427695	0.420453
					23.297	0.563195	0.427036	0.419925
					23.4215	0.563804	0.426377	0.419397
					23.5459	0.564516	0.425811	0.418773
					23.6703	0.565404	0.425403	0.417985
					23.7947	0.566293	0.424996	0.417197
					23.9191	0.567182	0.424589	0.41641
					24.0435	0.568252	0.424203	0.41592
					24.168	0.56966	0.423858	0.415986
					24.2924	0.571068	0.423513	0.416051
					24.4168	0.572476	0.423169	0.416117
					24.5412	0.573636	0.422875	0.416156
					24.6656	0.574294	0.422686	0.416144
					24.7901	0.574952	0.422496	0.416132
					24.9145	0.57561	0.422307	0.416119
					25.0389	0.576173	0.421942	0.416152
					25.1633	0.576526	0.421189	0.416283
					25.2877	0.576879	0.420436	0.416415
					25.4121	0.577232	0.419683	0.416546
					25.5365	0.577802	0.418987	0.416752
					25.661	0.578896	0.418428	0.41714
					25.7854	0.57999	0.417869	0.417527
					25.9098	0.581085	0.417311	0.417914
					26.0342	0.582089	0.416792	0.418475
					26.1586	0.582854	0.416381	0.419495
					26.283	0.58362	0.41597	0.420515
					26.4075	0.584386	0.415558	0.421535
					26.5319	0.585091	0.415181	0.42265
					26.6563	0.585621	0.414905	0.42404
					26.7807	0.586151	0.414628	0.425429
					26.9051	0.586681	0.414352	0.426819
					27.0296	0.587306	0.414045	0.428178
					27.154	0.588237	0.413641	0.429441
					27.2784	0.589169	0.413237	0.430703
					27.4028	0.590101	0.412833	0.431966
					27.5272	0.590985	0.412425	0.433194
					27.6516	0.591699	0.412003	0.4343
					27.7761	0.592413	0.411581	0.435406
					27.9005	0.593127	0.411159	0.436512
					28.0249	0.59389	0.410821	0.437496
					28.1493	0.594849	0.410823	0.437986
					28.2737	0.595807	0.410825	0.438475
					28.3981	0.596765	0.410827	0.438965
					28.5225	0.59776	0.410737	0.439422
					28.647	0.598919	0.41023	0.439727
					28.7714	0.600078	0.409723	0.440033
					28.8958	0.601236	0.409216	0.440338
					29.0202	0.602401	0.408668	0.44071
					29.1446	0.603592	0.407909	0.441426
					29.2691	0.604784	0.40715	0.442143
					29.3935	0.605976	0.40639	0.442859
					29.5179	0.607199	0.405677	0.443588
					29.6423	0.608607	0.405242	0.444389
					29.7667	0.610016	0.404807	0.445191
					29.8911	0.611424	0.404372	0.445992
					30.0156	0.61281	0.40401	0.446823
					30.14	0.61404	0.404166	0.447862
					30.2644	0.615271	0.404322	0.448901
					30.3888	0.616502	0.404478	0.44994
					30.5132	0.617746	0.404553	0.450949
					30.6376	0.619106	0.403938	0.451699
					30.762	0.620465	0.403323	0.452448
					30.8865	0.621825	0.402708	0.453198
					31.0109	0.623159	0.402088	0.453972
					31.1353	0.624229	0.401408	0.455001
					31.2597	0.625298	0.400727	0.45603
					31.3841	0.626368	0.400047	0.457058
					31.5085	0.627426	0.39941	0.458051
					31.633	0.62833	0.399377	0.458547
					31.7574	0.629234	0.399343	0.459043
					31.8818	0.630137	0.399309	0.459539
					32.0062	0.631062	0.399255	0.460019
					32.1306	0.632402	0.398827	0.460179
					32.255	0.633742	0.398399	0.460338
					32.3795	0.635082	0.39797	0.460498
					32.5039	0.63641	0.397533	0.460688
					32.6283	0.637349	0.396796	0.461874
					32.7527	0.638289	0.39606	0.463059
					32.8771	0.639228	0.395324	0.464245
					33.0016	0.640164	0.394586	0.465422
					33.126	0.640846	0.393674	0.46593
					33.2504	0.641528	0.392761	0.466438
					33.3748	0.642209	0.391849	0.466946
					33.4992	0.642891	0.390937	0.467454
					33.6236	0.643878	0.390424	0.468015
					33.7481	0.644868	0.389915	0.468576
					33.8725	0.645858	0.389406	0.469138
					33.9969	0.646848	0.388897	0.469699
					34.1213	0.647567	0.388412	0.469704
					34.2457	0.648278	0.387927	0.469694
					34.3701	0.64899	0.387443	0.469683
					34.4946	0.649702	0.386958	0.469673
					34.619	0.650346	0.386994	0.470136
					34.7434	0.650987	0.387055	0.470622
					34.8678	0.651627	0.387116	0.471107
					34.9922	0.652268	0.387176	0.471593
					35.1166	0.652866	0.387112	0.472064
					35.2411	0.65346	0.387039	0.472533
					35.3655	0.654055	0.386966	0.473004
					35.4899	0.654649	0.386893	0.473473
					35.6143	0.654525	0.387269	0.474189
					35.7387	0.654335	0.387686	0.474926
					35.8631	0.654146	0.388103	0.475664
					35.9876	0.653957	0.38852	0.476401
					36.112	0.654362	0.388701	0.476771
					36.2364	0.654834	0.388855	0.477098
					36.3608	0.655306	0.389009	0.477426
					36.4852	0.655778	0.389163	0.477754
					36.6096	0.656232	0.389369	0.478309
					36.7341	0.656683	0.389582	0.478894
					36.8585	0.657134	0.389795	0.479479
					36.9829	0.657585	0.390008	0.480064
					37.1073	0.65824	0.391017	0.480151
					37.2317	0.658927	0.392154	0.480158
					37.3561	0.659615	0.393291	0.480164
					37.4806	0.660303	0.394428	0.480171
					37.605	0.661077	0.396099	0.480517
					37.7294	0.661867	0.397869	0.480925
					37.8538	0.662657	0.39964	0.481333
					37.9782	0.663447	0.40141	0.481741
					38.1026	0.664457	0.402765	0.481408
					38.2271	0.665513	0.404031	0.480916
					38.3515	0.666569	0.405298	0.480424
					38.4759	0.667625	0.406564	0.479932
					38.6003	0.669055	0.408316	0.479489
					38.7247	0.670576	0.410186	0.479059
					38.8491	0.672097	0.412056	0.478629
					38.9736	0.673618	0.413926	0.478198
					39.098	0.6748	0.415571	0.478354
					39.2224	0.675889	0.417155	0.478669
					39.3468	0.676978	0.418739	0.478984
					39.4712	0.678068	0.420323	0.479299
					39.5956	0.679165	0.42162	0.479531
					39.7201	0.680264	0.42283	0.479739
					39.8445	0.681363	0.42404	0.479946
					39.9689	0.682462	0.425251	0.480154
					40.0933	0.683283	0.426629	0.480281
					40.2177	0.68401	0.428063	0.480381
					40.3421	0.684738	0.429497	0.480482
					40.4666	0.685466	0.430932	0.480582
					40.591	0.686067	0.431974	0.480447
					40.7154	0.686622	0.432872	0.480225
					40.8398	0.687177	0.433769	0.480004
					40.9642	0.687733	0.434667	0.479782
					41.0887	0.688513	0.435746	0.479243
					41.2131	0.689386	0.436899	0.478575
					41.3375	0.690258	0.438051	0.477906
					41.4619	0.69113	0.439204	0.477238
					41.5863	0.691641	0.440148	0.476936
					41.7107	0.69199	0.441	0.476797
					41.8351	0.69234	0.441852	0.476658
					41.9596	0.69269	0.442705	0.476519
					42.084	0.692997	0.443125	0.476375
					42.2084	0.693284	0.443336	0.476228
					42.3328	0.693571	0.443547	0.476081
					42.4572	0.693858	0.443758	0.475933
					42.5817	0.694098	0.4445	0.475837
					42.7061	0.694314	0.445522	0.475767
					42.8305	0.694529	0.446543	0.475697
					42.9549	0.694744	0.447565	0.475627
					43.0793	0.694625	0.448586	0.475407
					43.2037	0.694315	0.449606	0.475102
					43.3282	0.694006	0.450626	0.474796
					43.4526	0.693696	0.451646	0.47449
					43.577	0.693648	0.452206	0.474234
					43.7014	0.693762	0.452481	0.474008
					43.8258	0.693877	0.452756	0.473782
					43.9502	0.693991	0.45303	0.473556
					44.0746	0.693368	0.453366	0.473638
					44.1991	0.69225	0.453743	0.473928
					44.3235	0.691132	0.45412	0.474217
					44.4479	0.690014	0.454497	0.474506
					44.5723	0.68942	0.454673	0.474797
					44.6967	0.689206	0.454703	0.475089
					44.8212	0.688992	0.454733	0.475382
					44.9456	0.688778	0.454762	0.475674
					45.07	0.688505	0.454422	0.475516
					45.1944	0.688188	0.453793	0.475007
					45.3188	0.68787	0.453163	0.474498
					45.4432	0.687553	0.452533	0.473988
					45.5677	0.687338	0.45218	0.473712
					45.6921	0.687211	0.45206	0.473631
					45.8165	0.687084	0.45194	0.473551
					45.9409	0.686956	0.45182	0.47347
					46.0653	0.686601	0.451404	0.473489
					46.1897	0.686037	0.45072	0.473599
					46.3141	0.685474	0.450036	0.473709
					46.4386	0.68491	0.449352	0.473818
					46.563	0.684492	0.449095	0.47385
					46.6874	0.684216	0.449257	0.473805
					46.8118	0.68394	0.44942	0.473761
					46.9362	0.683664	0.449583	0.473716
					47.0607	0.683289	0.44982	0.47342
					47.1851	0.682809	0.450136	0.47286
					47.3095	0.682329	0.450452	0.472299
					47.4339	0.68185	0.450768	0.471739
					47.5583	0.681163	0.450549	0.471329
					47.6827	0.680241	0.44972	0.471091
					47.8072	0.679319	0.448891	0.470852
					47.9316	0.678396	0.448062	0.470613
					48.056	0.677776	0.447442	0.470482
					48.1804	0.677525	0.447079	0.470483
					48.3048	0.677275	0.446716	0.470483
					48.4292	0.677024	0.446353	0.470483
					48.5537	0.676552	0.446141	0.470425
					48.6781	0.675786	0.446129	0.47029
					48.8025	0.675019	0.446118	0.470154
					48.9269	0.674253	0.446106	0.470018
					49.0513	0.673827	0.446067	0.470044
					49.1757	0.67389	0.445986	0.470301
					49.3002	0.673954	0.445906	0.470558
					49.4246	0.674017	0.445826	0.470815
					49.549	0.674147	0.445687	0.471176
					49.6734	0.674381	0.445458	0.471695
					49.7978	0.674616	0.44523	0.472215
					49.9222	0.67485	0.445001	0.472734
					50.0467	0.675002	0.444843	0.47288
					50.1711	0.675016	0.444804	0.472399
					50.2955	0.675029	0.444766	0.471918
					50.4199	0.675043	0.444727	0.471437
					50.5443	0.675039	0.444668	0.471066
					50.6687	0.675003	0.444573	0.470893
					50.7932	0.674967	0.444478	0.47072
					50.9176	0.674931	0.444383	0.470547
					51.042	0.674759	0.444275	0.470247
					51.1664	0.674319	0.444141	0.469697
					51.2908	0.673879	0.444007	0.469146
					51.4152	0.673439	0.443873	0.468596
					51.5397	0.673215	0.443661	0.468073
					51.6641	0.673454	0.443278	0.467608
					51.7885	0.673692	0.442895	0.467143
					51.9129	0.673931	0.442512	0.466679
					52.0373	0.67431	0.442288	0.466307
					52.1617	0.675019	0.442436	0.466155
					52.2862	0.675728	0.442584	0.466002
					52.4106	0.676437	0.442732	0.465849
					52.535	0.676976	0.442796	0.465756
					52.6594	0.677075	0.442642	0.465815
					52.7838	0.677175	0.442487	0.465874
					52.9083	0.677274	0.442333	0.465933
					53.0327	0.677452	0.442275	0.466137
					53.1571	0.677851	0.44249	0.466748
					53.2815	0.678249	0.442705	0.467359
					53.4059	0.678648	0.44292	0.467971
					53.5303	0.679046	0.44295	0.468311
					53.6547	0.679446	0.442403	0.467802
					53.7792	0.679845	0.441856	0.467293
					53.9036	0.680244	0.441308	0.466784
					54.028	0.680632	0.440816	0.466477
					54.1524	0.680981	0.440516	0.466871
					54.2768	0.681331	0.440216	0.467265
					54.4012	0.681681	0.439916	0.467659
					54.5257	0.681948	0.43965	0.468043
					54.6501	0.681894	0.439519	0.468392
					54.7745	0.681841	0.439388	0.468741
					54.8989	0.681788	0.439257	0.469089
					55.0233	0.681923	0.439171	0.469366
					55.1478	0.682883	0.439281	0.469329
					55.2722	0.683843	0.439392	0.469291
					55.3966	0.684804	0.439503	0.469254
					55.521	0.685721	0.439492	0.469235
					55.6454	0.686421	0.438876	0.469308
					55.7698	0.687122	0.43826	0.469381
					55.8942	0.687822	0.437644	0.469454
					56.0187	0.688518	0.437036	0.469573
					56.1431	0.689192	0.436474	0.469958
					56.2675	0.689866	0.435913	0.470344
					56.3919	0.69054	0.435351	0.470729
					56.5163	0.691202	0.43488	0.47114
					56.6407	0.691787	0.435014	0.471723
					56.7652	0.692373	0.435148	0.472306
					56.8896	0.692958	0.435282	0.47289
					57.014	0.693547	0.435386	0.47357
					57.1384	0.694163	0.435246	0.47503
					57.2628	0.694779	0.435106	0.476489
					57.3873	0.695396	0.434966	0.477949
					57.5117	0.696028	0.43477	0.479347
					57.6361	0.69682	0.434019	0.480129
					57.7605	0.697612	0.433269	0.480912
					57.8849	0.698405	0.432518	0.481695
					58.0093	0.698983	0.431818	0.482592
					58.1337	0.696853	0.43176	0.484934
					58.2582	0.694723	0.431703	0.487277
					58.3826	0.692593	0.431645	0.489619
					58.507	0.690489	0.431689	0.491907
					58.6314	0.688832	0.433497	0.493238
					58.7558	0.687174	0.435304	0.49457
					58.8802	0.685516	0.437112	0.495902
					59.0047	0.68387	0.438815	0.49728
					59.1291	0.682529	0.437694	0.499902
					59.2535	0.681187	0.436573	0.502524
					59.3779	0.679846	0.435452	0.505146
					59.5023	0.678548	0.434351	0.507742
					59.6268	0.679794	0.434425	0.508826
					59.7512	0.681039	0.434499	0.50991
					59.8756	0.682285	0.434572	0.510993
					60	0.68353	0.434646	0.512077

## Sheet: K Statistics
Figure 2K - Statistical analysis
Kolmogorov-Smirnov Tests at 40 mins
PSB vs. +1				PSB	+1	-1
p	<0.0001		N	119	143	127
D	0.3187
PSB vs. -1
p	0.0033
D	0.2282
+1 vs. -1
p	0.1553
D	0.1378

## Sheet: L
Figure 2L	Interface alignment analysis over time for PSB, +1 and -1 interfaces in wgCX4; eve-EGFP, GAP43-mCherry embryos
Data Points					LOWESS
Time after GBE onset (mins)	PSB	+1	-1		Time after GBE onset (mins)	PSB	+1	-1
-20	0.5	0.4	0.571429		-20	0.525694	0.450423	0.530577
-19.5	0.555556	0.458333	0.454545		-19.8756	0.528223	0.454885	0.530348
-19	0.516129	0.575758	0.461539		-19.7512	0.530754	0.459347	0.53012
-18.5	0.515151	0.46875	0.571429		-19.6268	0.533284	0.463808	0.529891
-18	0.555556	0.393939	0.677419		-19.5023	0.535814	0.46827	0.529663
-17.5	0.514286	0.485714	0.5		-19.3779	0.535287	0.469559	0.535094
-17	0.545455	0.5	0.666667		-19.2535	0.534702	0.470787	0.540633
-16.5	0.6	0.470588	0.580645		-19.1291	0.534117	0.472015	0.546172
-16	0.542857	0.451613	0.580645		-19.0047	0.533532	0.473243	0.55171
-15.5	0.527778	0.5625	0.548387		-18.8803	0.534317	0.470726	0.555914
-15	0.527778	0.545455	0.566667		-18.7558	0.535156	0.468062	0.560066
-14.5	0.513513	0.5	0.548387		-18.6314	0.535995	0.465399	0.564218
-14	0.54054	0.485714	0.612903		-18.507	0.536834	0.462736	0.56837
-13.5	0.542857	0.484849	0.515151		-18.3826	0.53741	0.463956	0.568798
-13	0.486486	0.583333	0.548387		-18.2582	0.537971	0.465409	0.569003
-12.5	0.486486	0.588235	0.59375		-18.1337	0.538532	0.466861	0.569209
-12	0.567568	0.575758	0.5625		-18.0093	0.539092	0.468313	0.569415
-11.5	0.5	0.567568	0.5625		-17.8849	0.538562	0.471567	0.567313
-11	0.486486	0.486486	0.545455		-17.7605	0.537944	0.474966	0.565025
-10.5	0.487179	0.485714	0.566667		-17.6361	0.537325	0.478366	0.562736
-10	0.589744	0.472222	0.633333		-17.5117	0.536707	0.481765	0.560447
-9.5	0.538462	0.486486	0.529412		-17.3873	0.536766	0.483383	0.561583
-9	0.473684	0.54054	0.548387		-17.2628	0.536895	0.484817	0.563074
-8.5	0.54054	0.514286	0.606061		-17.1384	0.537024	0.486251	0.564565
-8	0.536585	0.571429	0.529412		-17.014	0.537153	0.487685	0.566056
-7.5	0.564103	0.525	0.606061		-16.8896	0.536708	0.488882	0.564858
-7	0.547619	0.567568	0.575758		-16.7652	0.536191	0.490051	0.563319
-6.5	0.55814	0.578947	0.545455		-16.6408	0.535673	0.491219	0.561779
-6	0.581395	0.54054	0.606061		-16.5163	0.535155	0.492387	0.56024
-5.5	0.547619	0.552632	0.59375		-16.3919	0.533887	0.493883	0.559993
-5	0.627907	0.615385	0.65625		-16.2675	0.532506	0.495428	0.55994
-4.5	0.545455	0.631579	0.677419		-16.1431	0.531125	0.496973	0.559888
-4	0.625	0.648649	0.575758		-16.0187	0.529743	0.498518	0.559836
-3.5	0.642857	0.631579	0.645161		-15.8942	0.529124	0.500185	0.559796
-3	0.6	0.6	0.5625		-15.7698	0.528639	0.501874	0.559758
-2.5	0.697674	0.589744	0.625		-15.6454	0.528154	0.503562	0.55972
-2	0.690476	0.619048	0.666667		-15.521	0.52767	0.505251	0.559683
-1.5	0.738095	0.642857	0.69697		-15.3966	0.527383	0.505544	0.560025
-1	0.727273	0.682927	0.657895		-15.2722	0.527136	0.505553	0.560444
-0.5	0.690476	0.707317	0.684211		-15.1478	0.52689	0.505562	0.560864
0	0.68	0.744681	0.714286		-15.0233	0.526643	0.505572	0.561283
0.5	0.653846	0.745098	0.627907		-14.8989	0.526427	0.505722	0.561495
1	0.701493	0.666667	0.615385		-14.7745	0.526218	0.505904	0.56166
1.5	0.71831	0.714286	0.666667		-14.6501	0.52601	0.506086	0.561824
2	0.679487	0.74026	0.676923		-14.5257	0.525801	0.506269	0.561988
2.5	0.697368	0.706667	0.615385		-14.4012	0.525786	0.506921	0.562346
3	0.695122	0.728395	0.704225		-14.2768	0.525822	0.507695	0.562754
3.5	0.705882	0.62963	0.650602		-14.1524	0.525858	0.508469	0.563162
4	0.72	0.670103	0.652174		-14.028	0.525894	0.509243	0.56357
4.5	0.652174	0.673469	0.631579		-13.9036	0.5257	0.510191	0.563304
5	0.692308	0.699029	0.617021		-13.7792	0.52544	0.511189	0.562841
5.5	0.660377	0.682692	0.652632		-13.6547	0.525179	0.512187	0.562378
6	0.7	0.628319	0.625		-13.5303	0.524919	0.513185	0.561916
6.5	0.672269	0.691667	0.669903		-13.4059	0.524682	0.51424	0.562418
7	0.660869	0.6	0.621622		-13.2815	0.524452	0.515315	0.563232
7.5	0.669565	0.58871	0.59322		-13.1571	0.524223	0.516389	0.564045
8	0.68254	0.606557	0.647541		-13.0327	0.523994	0.517463	0.564859
8.5	0.69697	0.576923	0.617391		-12.9082	0.52437	0.51762	0.565372
9	0.679389	0.590909	0.613445		-12.7838	0.524963	0.51745	0.565778
9.5	0.684615	0.601504	0.573913		-12.6594	0.525556	0.517281	0.566185
10	0.68254	0.549296	0.616667		-12.535	0.526149	0.517111	0.566591
10.5	0.664122	0.585714	0.631148		-12.4106	0.526832	0.516915	0.566599
11	0.688889	0.542254	0.584746		-12.2862	0.527549	0.516707	0.566451
11.5	0.691729	0.585185	0.617886		-12.1617	0.528267	0.5165	0.566303
12	0.678571	0.612676	0.616		-12.0373	0.528984	0.516293	0.566156
12.5	0.701389	0.584507	0.631148		-11.9129	0.529037	0.516239	0.566352
13	0.692308	0.55	0.58871		-11.7885	0.528804	0.516251	0.566695
13.5	0.638298	0.592857	0.625		-11.6641	0.528571	0.516263	0.567039
14	0.635714	0.569343	0.582677		-11.5397	0.528338	0.516275	0.567382
14.5	0.652174	0.598592	0.664062		-11.4152	0.52879	0.516421	0.567806
15	0.602837	0.595588	0.590551		-11.2908	0.529564	0.516629	0.568267
15.5	0.625	0.542857	0.541985		-11.1664	0.530338	0.516838	0.568728
16	0.639706	0.578947	0.564886		-11.042	0.531112	0.517047	0.569189
16.5	0.641379	0.529851	0.569343		-10.9176	0.532118	0.518048	0.569884
17	0.654135	0.51145	0.582734		-10.7932	0.533242	0.519454	0.570698
17.5	0.632353	0.552239	0.594203		-10.6687	0.534366	0.52086	0.571512
18	0.635714	0.537879	0.55		-10.5443	0.53549	0.522265	0.572327
18.5	0.617647	0.535211	0.546099		-10.4199	0.536733	0.523785	0.573034
19	0.619718	0.50365	0.548611		-10.2955	0.538043	0.525368	0.573681
19.5	0.560606	0.496403	0.496552		-10.1711	0.539353	0.526951	0.574329
20	0.6	0.5	0.506757		-10.0467	0.540663	0.528534	0.574977
20.5	0.631206	0.507246	0.517482		-9.92224	0.541253	0.530329	0.57512
21	0.630435	0.536232	0.521429		-9.79782	0.54141	0.532252	0.574961
21.5	0.655172	0.477612	0.503497		-9.67341	0.541567	0.534175	0.574802
22	0.643836	0.526717	0.493421		-9.54899	0.541724	0.536098	0.574643
22.5	0.642857	0.51049	0.506757		-9.42457	0.54241	0.538002	0.575357
23	0.586466	0.511111	0.519481		-9.30016	0.543441	0.539894	0.576638
23.5	0.681159	0.476923	0.51773		-9.17574	0.544472	0.541786	0.577919
24	0.625954	0.465649	0.525547		-9.05132	0.545503	0.543678	0.579201
24.5	0.626984	0.447761	0.521429		-8.9269	0.547195	0.545234	0.580411
25	0.671756	0.437956	0.546099		-8.80249	0.549352	0.546554	0.581572
25.5	0.65873	0.457143	0.518797		-8.67807	0.551508	0.547874	0.582733
26	0.64	0.454545	0.47482		-8.55365	0.553665	0.549194	0.583893
26.5	0.655462	0.421875	0.481482		-8.42924	0.555498	0.55079	0.584692
27	0.628099	0.473282	0.496296		-8.30482	0.557085	0.552597	0.585215
27.5	0.663866	0.438462	0.5		-8.1804	0.558673	0.554404	0.585738
28	0.645161	0.425532	0.5		-8.05599	0.56026	0.556211	0.586262
28.5	0.636364	0.452055	0.507353		-7.93157	0.562034	0.557697	0.587414
29	0.645669	0.466667	0.525926		-7.80715	0.563961	0.55892	0.58908
29.5	0.647059	0.44	0.514286		-7.68274	0.565888	0.560143	0.590747
30	0.689655	0.410959	0.451852		-7.55832	0.567816	0.561365	0.592414
30.5	0.675214	0.422819	0.454545		-7.4339	0.56969	0.563017	0.593631
31	0.677966	0.446667	0.485294		-7.30949	0.571517	0.565046	0.594451
31.5	0.678261	0.415493	0.459854		-7.18507	0.573344	0.567075	0.595271
32	0.681416	0.407143	0.511111		-7.06065	0.575171	0.569105	0.59609
32.5	0.603448	0.438356	0.5		-6.93624	0.577221	0.570968	0.597179
33	0.672269	0.464968	0.51773		-6.81182	0.579483	0.572673	0.598524
33.5	0.655462	0.444445	0.459854		-6.6874	0.581744	0.574378	0.599869
34	0.698276	0.432432	0.460317		-6.56299	0.584005	0.576083	0.601214
34.5	0.669492	0.416667	0.480315		-6.43857	0.586291	0.577822	0.602815
35	0.652174	0.42	0.496241		-6.31415	0.588603	0.579595	0.604678
35.5	0.636364	0.381945	0.484849		-6.18973	0.590914	0.581369	0.60654
36	0.660377	0.345588	0.481203		-6.06532	0.593225	0.583142	0.608403
36.5	0.60177	0.380282	0.465116		-5.9409	0.595463	0.585258	0.609933
37	0.612069	0.331081	0.484375		-5.81649	0.59762	0.587754	0.611093
37.5	0.591667	0.39726	0.456		-5.69207	0.599777	0.590249	0.612254
38	0.608696	0.412162	0.478992		-5.56765	0.601935	0.592745	0.613414
38.5	0.626087	0.386207	0.477612		-5.44323	0.604351	0.595268	0.614676
39	0.632479	0.385135	0.496183		-5.31882	0.607077	0.597826	0.616057
39.5	0.647059	0.398693	0.442029		-5.1944	0.609803	0.600383	0.617438
40	0.647059	0.37931	0.471015		-5.06998	0.612529	0.60294	0.618819
40.5	0.625	0.409722	0.5		-4.94557	0.614833	0.605215	0.619853
41	0.632479	0.42446	0.496454		-4.82115	0.616595	0.607128	0.620439
41.5	0.66129	0.392857	0.456522		-4.69673	0.618358	0.609042	0.621024
42	0.604839	0.391892	0.452055		-4.57232	0.62012	0.610955	0.62161
42.5	0.634783	0.394737	0.439716		-4.4479	0.622362	0.612831	0.622073
43	0.619835	0.380952	0.43609		-4.32348	0.625271	0.614656	0.622367
43.5	0.572581	0.381579	0.462687		-4.19907	0.628181	0.61648	0.622661
44	0.577236	0.367347	0.482014		-4.07465	0.63109	0.618305	0.622954
44.5	0.583333	0.384058	0.485714		-3.95023	0.633607	0.620065	0.623781
45	0.594828	0.374101	0.425532		-3.82582	0.635535	0.621728	0.625407
45.5	0.594828	0.434109	0.446808		-3.7014	0.637462	0.62339	0.627033
46	0.569106	0.411765	0.464789		-3.57698	0.639389	0.625053	0.628659
46.5	0.61157	0.492188	0.446043		-3.45257	0.641235	0.626804	0.629939
47	0.559322	0.437956	0.440559		-3.32815	0.642948	0.628699	0.630658
47.5	0.575	0.453901	0.479452		-3.20373	0.64466	0.630595	0.631377
48	0.586207	0.445256	0.485916		-3.07931	0.646373	0.63249	0.632096
48.5	0.61157	0.454545	0.478873		-2.9549	0.648292	0.63453	0.633203
49	0.614754	0.452055	0.486486		-2.83048	0.650575	0.636825	0.634993
49.5	0.555556	0.421429	0.44		-2.70607	0.652859	0.63912	0.636782
50	0.631148	0.422535	0.516556		-2.58165	0.655142	0.641415	0.638572
50.5	0.625	0.402878	0.503356		-2.45723	0.656978	0.643749	0.640073
51	0.603448	0.446154	0.469388		-2.33282	0.657958	0.646157	0.641024
51.5	0.606838	0.369565	0.452055		-2.2084	0.658938	0.648566	0.641975
52	0.585586	0.397163	0.462069		-2.08398	0.659918	0.650974	0.642926
52.5	0.62931	0.390977	0.441559		-1.95956	0.660905	0.653245	0.643679
53	0.666667	0.419118	0.469388		-1.83515	0.661906	0.65523	0.644021
53.5	0.675	0.40625	0.5		-1.71073	0.662906	0.657214	0.644363
54	0.603448	0.412214	0.475525		-1.58631	0.663907	0.659198	0.644705
54.5	0.631148	0.48	0.432432		-1.4619	0.664687	0.661064	0.644897
55	0.639344	0.387597	0.421429		-1.33748	0.664967	0.662662	0.64475
55.5	0.655172	0.392	0.485916		-1.21306	0.665246	0.664259	0.644602
56	0.628319	0.40625	0.417266		-1.08865	0.665526	0.665856	0.644455
56.5	0.646552	0.409836	0.428571		-0.96423	0.665811	0.667273	0.644429
57	0.596639	0.475	0.447761		-0.839813	0.666109	0.66824	0.644707
57.5	0.607143	0.463415	0.40625		-0.715396	0.666408	0.669207	0.644984
58	0.646552	0.428571	0.430657		-0.590979	0.666706	0.670174	0.645262
58.5	0.681818	0.467213	0.426357		-0.466563	0.667102	0.671015	0.645424
59	0.622449	0.387387	0.427419		-0.342146	0.667761	0.671513	0.645272
59.5	0.653846	0.40404	0.456896		-0.217729	0.668421	0.67201	0.64512
60	0.63	0.417476	0.424779		-0.0933123	0.66908	0.672508	0.644969
					0.0311045	0.669745	0.672833	0.64469
					0.155521	0.670428	0.672638	0.644029
					0.279938	0.671111	0.672443	0.643368
					0.404355	0.671794	0.672248	0.642707
					0.528772	0.672533	0.671995	0.642284
					0.653188	0.673461	0.671549	0.642653
					0.777605	0.674388	0.671103	0.643022
					0.902022	0.675316	0.670657	0.64339
					1.02644	0.676092	0.670377	0.643779
					1.15086	0.676305	0.670712	0.644244
					1.27527	0.676519	0.671047	0.644709
					1.39969	0.676732	0.671382	0.645174
					1.52411	0.676884	0.671548	0.645493
					1.64852	0.67678	0.671013	0.645204
					1.77294	0.676675	0.670478	0.644914
					1.89736	0.676571	0.669942	0.644625
					2.02177	0.676542	0.6693	0.644292
					2.14619	0.676869	0.66815	0.643754
					2.27061	0.677197	0.667	0.643216
					2.39502	0.677525	0.66585	0.642678
					2.51944	0.677807	0.664726	0.64225
					2.64386	0.677845	0.663739	0.642419
					2.76827	0.677883	0.662752	0.642587
					2.89269	0.67792	0.661766	0.642756
					3.01711	0.677955	0.660703	0.642752
					3.14153	0.677969	0.659162	0.64166
					3.26594	0.677983	0.657621	0.640567
					3.39036	0.677997	0.656079	0.639475
					3.51478	0.677988	0.654663	0.638453
					3.63919	0.677816	0.654175	0.637956
					3.76361	0.677643	0.653687	0.63746
					3.88802	0.67747	0.6532	0.636963
					4.01244	0.677274	0.65264	0.636457
					4.13686	0.676872	0.651426	0.635861
					4.26128	0.676469	0.650213	0.635266
					4.38569	0.676067	0.649	0.634671
					4.51011	0.675735	0.647769	0.634093
					4.63453	0.6762	0.646341	0.63371
					4.75894	0.676666	0.644913	0.633328
					4.88336	0.677131	0.643485	0.632945
					5.00778	0.677564	0.642027	0.632573
					5.13219	0.677504	0.64012	0.632352
					5.25661	0.677444	0.638213	0.632132
					5.38103	0.677384	0.636306	0.631912
					5.50544	0.677342	0.634402	0.631671
					5.62986	0.6777	0.632584	0.630957
					5.75428	0.678059	0.630766	0.630244
					5.87869	0.678417	0.628948	0.629531
					6.00311	0.678763	0.627146	0.628827
					6.12753	0.678588	0.625961	0.628452
					6.25195	0.678413	0.624775	0.628077
					6.37636	0.678239	0.62359	0.627702
					6.50078	0.678066	0.622399	0.627323
					6.62519	0.678214	0.620319	0.626334
					6.74961	0.678362	0.61824	0.625344
					6.87403	0.678511	0.61616	0.624355
					6.99845	0.678659	0.614081	0.623365
					7.12286	0.678908	0.613148	0.622985
					7.24728	0.679159	0.612229	0.622613
					7.3717	0.679409	0.611311	0.622241
					7.49611	0.679659	0.610393	0.621869
					7.62053	0.679731	0.60963	0.621868
					7.74495	0.679798	0.608871	0.621879
					7.86936	0.679864	0.608112	0.621889
					7.99378	0.67993	0.607353	0.6219
					8.1182	0.679744	0.606383	0.621219
					8.24261	0.679545	0.605402	0.620501
					8.36703	0.679345	0.604421	0.619783
					8.49145	0.679146	0.60344	0.619066
					8.61586	0.678667	0.602832	0.618669
					8.74028	0.678168	0.602252	0.618296
					8.8647	0.677668	0.601672	0.617923
					8.98911	0.677168	0.601092	0.61755
					9.11353	0.67678	0.60035	0.617172
					9.23795	0.676403	0.599592	0.616794
					9.36237	0.676026	0.598833	0.616416
					9.48678	0.675649	0.598075	0.616038
					9.6112	0.67513	0.59717	0.616078
					9.73561	0.674592	0.596247	0.616168
					9.86003	0.674055	0.595324	0.616258
					9.98445	0.673518	0.5944	0.616348
					10.1089	0.672934	0.594051	0.615907
					10.2333	0.672342	0.593784	0.615389
					10.3577	0.67175	0.593517	0.614871
					10.4821	0.671159	0.593251	0.614353
					10.6065	0.670717	0.592551	0.613612
					10.7309	0.6703	0.591778	0.612833
					10.8554	0.669884	0.591005	0.612054
					10.9798	0.669467	0.590233	0.611275
					11.1042	0.668725	0.589909	0.610946
					11.2286	0.667921	0.589673	0.610705
					11.353	0.667116	0.589437	0.610464
					11.4774	0.666311	0.589201	0.610223
					11.6019	0.665412	0.58847	0.609566
					11.7263	0.664493	0.587629	0.608817
					11.8507	0.663574	0.586789	0.608068
					11.9751	0.662654	0.585948	0.607318
					12.0995	0.6618	0.584754	0.606504
					12.224	0.660963	0.583472	0.605674
					12.3484	0.660125	0.58219	0.604844
					12.4728	0.659287	0.580907	0.604014
					12.5972	0.658134	0.579837	0.602926
					12.7216	0.656893	0.578826	0.601767
					12.846	0.655652	0.577816	0.600608
					12.9704	0.65441	0.576805	0.599448
					13.0949	0.653178	0.576076	0.59861
					13.2193	0.651948	0.575436	0.597871
					13.3437	0.650719	0.574795	0.597132
					13.4681	0.649489	0.574154	0.596393
					13.5925	0.648732	0.573038	0.595199
					13.717	0.648137	0.571758	0.593848
					13.8414	0.647543	0.570478	0.592497
					13.9658	0.646949	0.569197	0.591146
					14.0902	0.64636	0.568079	0.590097
					14.2146	0.645774	0.567023	0.589162
					14.339	0.645187	0.565967	0.588228
					14.4634	0.644601	0.564911	0.587293
					14.5879	0.64386	0.56353	0.5855
					14.7123	0.643055	0.562014	0.583348
					14.8367	0.64225	0.560499	0.581196
					14.9611	0.641444	0.558983	0.579045
					15.0855	0.641102	0.557442	0.57745
					15.2099	0.64097	0.55589	0.576109
					15.3344	0.640838	0.554337	0.574768
					15.4588	0.640706	0.552785	0.573427
					15.5832	0.64041	0.55166	0.572446
					15.7076	0.640033	0.550748	0.571644
					15.832	0.639655	0.549836	0.570842
					15.9565	0.639277	0.548923	0.57004
					16.0809	0.638805	0.547673	0.568999
					16.2053	0.638282	0.54624	0.56783
					16.3297	0.63776	0.544807	0.566662
					16.4541	0.637237	0.543374	0.565493
					16.5785	0.636732	0.542311	0.564254
					16.703	0.636237	0.541463	0.562975
					16.8274	0.635742	0.540615	0.561695
					16.9518	0.635247	0.539768	0.560416
					17.0762	0.634678	0.539035	0.559009
					17.2006	0.634063	0.538374	0.557521
					17.325	0.633448	0.537713	0.556033
					17.4495	0.632834	0.537053	0.554545
					17.5739	0.632422	0.536027	0.552958
					17.6983	0.63215	0.534752	0.551303
					17.8227	0.631878	0.533477	0.549648
					17.9471	0.631606	0.532201	0.547992
					18.0715	0.63135	0.530975	0.546672
					18.196	0.631104	0.529786	0.5456
					18.3204	0.630858	0.528596	0.544529
					18.4448	0.630612	0.527407	0.543457
					18.5692	0.630538	0.52618	0.542421
					18.6936	0.630602	0.524922	0.541415
					18.818	0.630666	0.523664	0.540408
					18.9425	0.63073	0.522406	0.539401
					19.0669	0.630818	0.521317	0.538376
					19.1913	0.630928	0.520374	0.537336
					19.3157	0.631038	0.519432	0.536295
					19.4401	0.631148	0.518489	0.535254
					19.5645	0.631701	0.517555	0.534567
					19.689	0.632667	0.51663	0.53421
					19.8134	0.633633	0.515704	0.533853
					19.9378	0.634598	0.514779	0.533496
					20.0622	0.635349	0.513795	0.533077
					20.1866	0.635885	0.512754	0.532596
					20.311	0.636421	0.511713	0.532116
					20.4355	0.636957	0.510671	0.531635
					20.5599	0.637324	0.509553	0.531088
					20.6843	0.637508	0.50835	0.530469
					20.8087	0.637693	0.507148	0.52985
					20.9331	0.637877	0.505945	0.529231
					21.0575	0.638085	0.504536	0.528589
					21.182	0.638319	0.502887	0.52792
					21.3064	0.638552	0.501238	0.527251
					21.4308	0.638786	0.499588	0.526583
					21.5552	0.638888	0.498261	0.526026
					21.6796	0.638822	0.497337	0.52561
					21.8041	0.638756	0.496413	0.525194
					21.9285	0.638691	0.495489	0.524778
					22.0529	0.638695	0.49428	0.524433
					22.1773	0.638794	0.492685	0.524184
					22.3017	0.638893	0.491089	0.523935
					22.4261	0.638992	0.489493	0.523686
					22.5506	0.639108	0.487966	0.523376
					22.675	0.639248	0.486539	0.522976
					22.7994	0.639388	0.485111	0.522577
					22.9238	0.639528	0.483684	0.522177
					23.0482	0.639976	0.482236	0.521712
					23.1726	0.640912	0.480756	0.521142
					23.297	0.641849	0.479275	0.520573
					23.4215	0.642786	0.477795	0.520003
					23.5459	0.643287	0.476466	0.519435
					23.6703	0.643041	0.475398	0.518867
					23.7947	0.642795	0.47433	0.5183
					23.9191	0.642548	0.473261	0.517732
					24.0435	0.642571	0.472236	0.517116
					24.168	0.643096	0.47129	0.516411
					24.2924	0.643621	0.470344	0.515706
					24.4168	0.644146	0.469398	0.515002
					24.5412	0.644689	0.468523	0.514303
					24.6656	0.645266	0.46779	0.513618
					24.7901	0.645843	0.467057	0.512932
					24.9145	0.64642	0.466325	0.512247
					25.0389	0.646824	0.46563	0.51145
					25.1633	0.646846	0.465018	0.510409
					25.2877	0.646868	0.464407	0.509368
					25.4121	0.646889	0.463796	0.508328
					25.5365	0.646962	0.463113	0.507385
					25.661	0.647158	0.462258	0.506681
					25.7854	0.647354	0.461403	0.505976
					25.9098	0.64755	0.460548	0.505272
					26.0342	0.647814	0.459707	0.504725
					26.1586	0.648261	0.458904	0.504598
					26.283	0.648707	0.4581	0.50447
					26.4075	0.649154	0.457297	0.504343
					26.5319	0.649551	0.456613	0.504195
					26.6563	0.649805	0.456277	0.503987
					26.7807	0.650059	0.45594	0.503779
					26.9051	0.650313	0.455604	0.503571
					27.0296	0.650656	0.455116	0.503317
					27.154	0.651286	0.454141	0.502913
					27.2784	0.651916	0.453165	0.502509
					27.4028	0.652546	0.452189	0.502104
					27.5272	0.653076	0.451317	0.501689
					27.6516	0.653248	0.450816	0.501232
					27.7761	0.65342	0.450315	0.500775
					27.9005	0.653592	0.449814	0.500318
					28.0249	0.653812	0.449349	0.499861
					28.1493	0.654221	0.449029	0.499404
					28.2737	0.654631	0.448709	0.498946
					28.3981	0.655041	0.448389	0.498489
					28.5225	0.655469	0.448001	0.498014
					28.647	0.655984	0.447305	0.49746
					28.7714	0.656498	0.446609	0.496905
					28.8958	0.657012	0.445914	0.496351
					29.0202	0.657502	0.445175	0.495755
					29.1446	0.657862	0.444211	0.494945
					29.2691	0.658222	0.443248	0.494135
					29.3935	0.658581	0.442285	0.493325
					29.5179	0.65893	0.441356	0.492534
					29.6423	0.659211	0.440636	0.491857
					29.7667	0.659492	0.439916	0.491179
					29.8911	0.659772	0.439196	0.490502
					30.0156	0.659972	0.43851	0.489926
					30.14	0.659595	0.438072	0.490063
					30.2644	0.659218	0.437635	0.4902
					30.3888	0.658842	0.437197	0.490337
					30.5132	0.658471	0.436734	0.490471
					30.6376	0.658158	0.43606	0.490588
					30.762	0.657845	0.435385	0.490704
					30.8865	0.657531	0.434711	0.49082
					31.0109	0.657204	0.434003	0.490902
					31.1353	0.65673	0.432938	0.490622
					31.2597	0.656256	0.431874	0.490342
					31.3841	0.655783	0.430809	0.490062
					31.5085	0.655301	0.429768	0.489805
					31.633	0.654707	0.429053	0.489867
					31.7574	0.654114	0.428338	0.48993
					31.8818	0.65352	0.427623	0.489992
					32.0062	0.65292	0.426911	0.490022
					32.1306	0.652188	0.426279	0.489411
					32.255	0.651455	0.425647	0.4888
					32.3795	0.650723	0.425014	0.488189
					32.5039	0.65002	0.424369	0.487582
					32.6283	0.650258	0.423311	0.487099
					32.7527	0.650496	0.422252	0.486615
					32.8771	0.650733	0.421194	0.486132
					33.0016	0.650961	0.420131	0.485645
					33.126	0.65027	0.418707	0.484916
					33.2504	0.64958	0.417282	0.484187
					33.3748	0.64889	0.415858	0.483457
					33.4992	0.648199	0.414433	0.482728
					33.6236	0.647699	0.413274	0.482759
					33.7481	0.6472	0.412117	0.482795
					33.8725	0.646701	0.41096	0.482832
					33.9969	0.646202	0.409803	0.482868
					34.1213	0.645137	0.408817	0.482925
					34.2457	0.644057	0.407835	0.482983
					34.3701	0.642977	0.406854	0.48304
					34.4946	0.641898	0.405873	0.483098
					34.619	0.641155	0.405116	0.482915
					34.7434	0.640429	0.404369	0.482721
					34.8678	0.639703	0.403622	0.482527
					34.9922	0.638977	0.402876	0.482333
					35.1166	0.638455	0.402114	0.481925
					35.2411	0.637947	0.40135	0.481503
					35.3655	0.637439	0.400587	0.481081
					35.4899	0.636931	0.399824	0.480658
					35.6143	0.636609	0.399543	0.480336
					35.7387	0.636303	0.399305	0.480023
					35.8631	0.635997	0.399067	0.47971
					35.9876	0.635691	0.398829	0.479397
					36.112	0.635076	0.399055	0.479087
					36.2364	0.634426	0.399334	0.478778
					36.3608	0.633776	0.399612	0.47847
					36.4852	0.633127	0.39989	0.478161
					36.6096	0.633112	0.399794	0.47801
					36.7341	0.633185	0.399646	0.477881
					36.8585	0.633257	0.399498	0.477752
					36.9829	0.63333	0.39935	0.477623
					37.1073	0.633244	0.39978	0.477259
					37.2317	0.633133	0.400302	0.476857
					37.3561	0.633022	0.400824	0.476455
					37.4806	0.632912	0.401346	0.476054
					37.605	0.63298	0.401156	0.47595
					37.7294	0.633081	0.400833	0.475901
					37.8538	0.633183	0.400511	0.475853
					37.9782	0.633285	0.400188	0.475804
					38.1026	0.633158	0.399713	0.475494
					38.2271	0.632983	0.399206	0.475127
					38.3515	0.632807	0.398698	0.474761
					38.4759	0.632631	0.398191	0.474394
					38.6003	0.63222	0.397987	0.474024
					38.7247	0.631753	0.397856	0.473653
					38.8491	0.631285	0.397726	0.473282
					38.9736	0.630817	0.397595	0.472911
					39.098	0.630233	0.397542	0.472325
					39.2224	0.629617	0.397511	0.471682
					39.3468	0.629002	0.397479	0.471038
					39.4712	0.628386	0.397448	0.470394
					39.5956	0.627572	0.397366	0.470279
					39.7201	0.626698	0.397268	0.470324
					39.8445	0.625824	0.397171	0.47037
					39.9689	0.62495	0.397073	0.470415
					40.0933	0.624022	0.397266	0.470175
					40.2177	0.623076	0.397556	0.469839
					40.3421	0.622131	0.397846	0.469504
					40.4666	0.621185	0.398135	0.469168
					40.591	0.620408	0.398236	0.468552
					40.7154	0.619694	0.398266	0.467833
					40.8398	0.61898	0.398297	0.467113
					40.9642	0.618265	0.398327	0.466394
					41.0887	0.617455	0.398308	0.465708
					41.2131	0.616606	0.398269	0.465037
					41.3375	0.615757	0.398229	0.464366
					41.4619	0.614908	0.39819	0.463694
					41.5863	0.613773	0.398519	0.463404
					41.7107	0.612513	0.399012	0.463282
					41.8351	0.611252	0.399506	0.46316
					41.9596	0.609991	0.399999	0.463038
					42.084	0.609213	0.400573	0.462985
					42.2084	0.608669	0.401187	0.462965
					42.3328	0.608125	0.401801	0.462945
					42.4572	0.607582	0.402415	0.462925
					42.5817	0.606781	0.403056	0.46305
					42.7061	0.605846	0.403711	0.463251
					42.8305	0.604911	0.404366	0.463453
					42.9549	0.603976	0.405021	0.463655
					43.0793	0.603173	0.405824	0.463936
					43.2037	0.602446	0.406712	0.464265
					43.3282	0.601718	0.407599	0.464593
					43.4526	0.600991	0.408486	0.464921
					43.577	0.600672	0.409389	0.465079
					43.7014	0.600607	0.410302	0.465132
					43.8258	0.600542	0.411215	0.465185
					43.9502	0.600477	0.412127	0.465237
					44.0746	0.600414	0.413156	0.465166
					44.1991	0.600352	0.414264	0.465012
					44.3235	0.60029	0.415371	0.464857
					44.4479	0.600229	0.416478	0.464703
					44.5723	0.600156	0.417448	0.464531
					44.6967	0.600077	0.418318	0.464348
					44.8212	0.599997	0.419189	0.464164
					44.9456	0.599917	0.420059	0.463981
					45.07	0.59979	0.420982	0.464248
					45.1944	0.599625	0.421946	0.464868
					45.3188	0.599461	0.42291	0.465488
					45.4432	0.599296	0.423873	0.466108
					45.5677	0.599177	0.42438	0.466588
					45.6921	0.599096	0.424501	0.466948
					45.8165	0.599016	0.424622	0.467308
					45.9409	0.598935	0.424744	0.467668
					46.0653	0.599092	0.424983	0.467909
					46.1897	0.599464	0.42533	0.468042
					46.3141	0.599836	0.425676	0.468174
					46.4386	0.600209	0.426023	0.468307
					46.563	0.600358	0.425801	0.468568
					46.6874	0.600289	0.42502	0.468954
					46.8118	0.60022	0.42424	0.469341
					46.9362	0.600151	0.42346	0.469727
					47.0607	0.600469	0.422995	0.470151
					47.1851	0.601196	0.422865	0.470616
					47.3095	0.601923	0.422734	0.47108
					47.4339	0.60265	0.422604	0.471544
					47.5583	0.603337	0.422357	0.47176
					47.6827	0.603978	0.421979	0.471695
					47.8072	0.60462	0.4216	0.471629
					47.9316	0.605261	0.421222	0.471563
					48.056	0.605885	0.420873	0.47144
					48.1804	0.606487	0.420561	0.471246
					48.3048	0.607089	0.42025	0.471052
					48.4292	0.607691	0.419938	0.470859
					48.5537	0.608187	0.419552	0.470681
					48.6781	0.608543	0.419067	0.470523
					48.8025	0.608899	0.418581	0.470365
					48.9269	0.609255	0.418096	0.470207
					49.0513	0.609619	0.417602	0.46998
					49.1757	0.609996	0.417095	0.469653
					49.3002	0.610372	0.416588	0.469326
					49.4246	0.610749	0.416082	0.469
					49.549	0.611451	0.415723	0.468887
					49.6734	0.612659	0.415594	0.469105
					49.7978	0.613868	0.415465	0.469324
					49.9222	0.615075	0.415336	0.469542
					50.0467	0.615925	0.415207	0.469356
					50.1711	0.616172	0.415076	0.468491
					50.2955	0.616419	0.414945	0.467626
					50.4199	0.616666	0.414814	0.466761
					50.5443	0.616941	0.414788	0.465918
					50.6687	0.617264	0.414953	0.465115
					50.7932	0.617588	0.415117	0.464313
					50.9176	0.617912	0.415282	0.463511
					51.042	0.618335	0.415272	0.462825
					51.1664	0.618952	0.414915	0.46237
					51.2908	0.61957	0.414558	0.461915
					51.4152	0.620188	0.414201	0.46146
					51.5397	0.620798	0.414177	0.461053
					51.6641	0.621393	0.414872	0.460749
					51.7885	0.621988	0.415566	0.460445
					51.9129	0.622582	0.41626	0.460141
					52.0373	0.623269	0.416862	0.45978
					52.1617	0.624174	0.417247	0.459286
					52.2862	0.625078	0.417631	0.458792
					52.4106	0.625982	0.418016	0.458297
					52.535	0.626733	0.418432	0.457866
					52.6594	0.627091	0.418931	0.457597
					52.7838	0.627448	0.419429	0.457328
					52.9083	0.627806	0.419927	0.457058
					53.0327	0.628035	0.420335	0.456685
					53.1571	0.627902	0.420485	0.456014
					53.2815	0.627769	0.420636	0.455344
					53.4059	0.627636	0.420787	0.454674
					53.5303	0.627471	0.420982	0.453893
					53.6547	0.627207	0.421318	0.452765
					53.7792	0.626943	0.421654	0.451637
					53.9036	0.626679	0.42199	0.450509
					54.028	0.626625	0.422312	0.449439
					54.1524	0.627302	0.42259	0.448571
					54.2768	0.62798	0.422868	0.447703
					54.4012	0.628657	0.423147	0.446836
					54.5257	0.629262	0.423237	0.446078
					54.6501	0.629587	0.422596	0.445749
					54.7745	0.629911	0.421956	0.44542
					54.8989	0.630236	0.421316	0.44509
					55.0233	0.63054	0.420907	0.444788
					55.1478	0.630752	0.421511	0.444604
					55.2722	0.630964	0.422115	0.444419
					55.3966	0.631176	0.422719	0.444235
					55.521	0.631348	0.42332	0.443894
					55.6454	0.631318	0.423911	0.442769
					55.7698	0.631288	0.424501	0.441644
					55.8942	0.631258	0.425091	0.44052
					56.0187	0.631285	0.425657	0.439538
					56.1431	0.631633	0.42608	0.439379
					56.2675	0.631981	0.426503	0.439219
					56.3919	0.632329	0.426927	0.43906
					56.5163	0.632639	0.427347	0.438881
					56.6407	0.632695	0.427747	0.438572
					56.7652	0.632751	0.428147	0.438263
					56.8896	0.632807	0.428547	0.437954
					57.014	0.632966	0.428813	0.437607
					57.1384	0.633943	0.428002	0.436951
					57.2628	0.63492	0.427191	0.436296
					57.3873	0.635897	0.42638	0.435641
					57.5117	0.636875	0.425564	0.435064
					57.6361	0.637863	0.424696	0.435267
					57.7605	0.63885	0.423828	0.435469
					57.8849	0.639837	0.422961	0.435672
					58.0093	0.640768	0.422134	0.435843
					58.1337	0.640983	0.421822	0.435618
					58.2582	0.641197	0.42151	0.435394
					58.3826	0.641412	0.421198	0.435169
					58.507	0.641558	0.420802	0.434956
					58.6314	0.640512	0.418942	0.43495
					58.7558	0.639465	0.417082	0.434944
					58.8802	0.638418	0.415222	0.434937
					59.0047	0.637441	0.413453	0.434936
					59.1291	0.638346	0.414154	0.435073
					59.2535	0.639251	0.414855	0.43521
					59.3779	0.640156	0.415556	0.435347
					59.5023	0.641036	0.416251	0.435456
					59.6268	0.640497	0.416595	0.433959
					59.7512	0.639957	0.416938	0.432461
					59.8756	0.639418	0.417282	0.430964
					60	0.638878	0.417626	0.429466

## Sheet: L Statistics
Figure 2L - Statistical analysis
Kolmogorov-Smirnov Tests at 40 mins
PSB vs. +1				PSB	+1	-1
p	<0.0001		N	119	145	138
D	0.3134
PSB vs. -1
p	0.0006
D	0.2511
+1 vs. -1
p	0.1354
D	0.138

## Sheet: M
Figure 2M	Analysis of relative Myosin II enrichment in PSB interfaces at stages 8, 9, 10 and 11 in fixed immunostained WT and wgCX4 embryos
WT
Stage 8			Stage 9			Stage 10			Stage 11
Embryo	PSB	log(PSB/+1)	Embryo	PSB	log(PSB/+1)	Embryo	PSB	log(PSB/+1)	Embryo	PSB	log(PSB/+1)
1	1	0.0170657	1	1	0.108331	1	1	0.0774229	2	1	0.0116568
1	2	0.0856779	1	2	0.070446	1	2	0.0828273	2	2	0.0952796
1	3	0.00284916	1	3	0.0918772	2	1	0.0943877	2	3	0.0982101
2	1	-0.00965781	4	1	0.104444	2	2	0.119058	3	1	0.0407216
2	2	0.0663086	4	2	0.0624818	2	3	0.0822982	3	2	0.0185034
2	3	-0.0269779	4	3	0.138838	3	2	0.123177	3	3	0.0257861
2	4	0.0345127	5	1	0.0829283	3	3	0.134894	5	1	0.0400034
3	1	0.0482407	5	2	0.0697734	3	1	0.0529886	5	2	0.0849965
3	2	0.0177682	5	3	0.126058	4	2	0.0857868	5	3	0.174903
3	3	0.071565	6	1	0.0839927	4	3	0.109408	8	1	0.035569
3	4	0.0512127	6	2	0.165056	4	1	0.0526311	8	2	0.0879548
4	1	0.00927489	6	3	0.0214439	6	1	0.0834091	8	3	0.147951
4	2	0.0254271	7	2	0.128157	6	2	0.0488793	9	1	-0.0138341
4	3	0.0568703	7	3	0.0421741	6	3	0.0991807	9	2	0.0551492
5	1	-0.0400623	7	1	0.0731145	7	3	0.0968137	9	3	0.0570149
5	2	0.0357799	8	3	0.234871	7	1	0.0471878	10	1	0.138985
5	3	0.0173033	8	1	0.075095	7	2	0.096587	10	2	0.0771142
6	1	0.0527796	8	2	0.112364	8	1	0.0899311	10	3	-0.0247263
6	2	0.0212677	9	2	0.0961002	8	2	0.0347767	11	1	0.107368
6	3	0.0373774	9	1	0.09799	8	3	0.116319	11	2	0.0980766
7	1	0.0215996	9	3	0.116168	9	1	0.11345	11	3	0.0421654
7	2	0.0835036	9	4	0.198967	9	2	0.111183	12	1	0.123377
7	3	0.0430934	10	3	0.0790573	9	3	0.0793895	12	2	0.0497704
8	1	0.046938	10	1	0.0604189	12	1	0.106718	12	3	0.0460056
8	2	0.0220105	10	2	0.0464133	12	2	0.0554369	14	1	0.102936
8	3	0.038054	10	4	0.0709115	12	3	0.0985699	14	2	-0.0523666
9	1	0.0837654	11	1	-0.0359499	14	1	0.170788	14	3	0.0391914
9	2	0.0605604	11	2	0.0228811	14	2	0.0600868
9	3	0.0758631	11	3	0.100251	14	3	0.0859027
10	1	-0.0257327	12	1	0.149147
10	2	0.103707	12	2	0.0171244
			12	3	0.0238302
wgCX4
Stage 8			Stage 9			Stage 10			Stage 11
Embryo	PSB	log(PSB/+1)	Embryo	PSB	log(PSB/+1)	Embryo	PSB	log(PSB/+1)	Embryo	PSB	log(PSB/+1)
1	1	0.0573915	1	1	0.121326	1	1	0.000330119	1	1	-0.0219774
1	2	0.0948243	1	2	0.107562	1	2	0.00179188	1	2	0.00314
1	3	0.0748671	1	3	0.0341318	1	3	0.0227428	1	3	0.060351
2	1	0.109713	2	1	-0.0199922	2	1	0.118125	3	1	0.010949
2	2	0.0536523	2	2	0.0630444	2	2	0.0897009	3	2	-0.00980988
2	3	0.134354	2	3	0.0613895	2	3	-0.00892298	3	3	0.0190854
3	1	-0.0103873	4	1	-0.0526575	3	2	0.0785574	3	4	0.0321654
3	2	0.034356	4	2	0.0455713	3	1	0.0795376	4	2	0.0153639
3	3	0.0383808	4	3	0.0481835	3	3	0.0409724	4	1	0.0446377
4	1	0.0360141	5	2	0.0394662	4	1	0.0152084	4	3	0.039143
4	2	0.024301	5	1	0.0157102	4	2	0.122962	5	1	-0.00770403
4	3	0.0841841	5	3	0.0309358	4	3	0.0453478	5	2	0.04724
1_1	1	0.0235587	6	1	0.0318253	5	1	0.0251495	5	3	0.0495468
1_1	2	0.0383076	6	2	0.0482728	5	2	0.0258657	6	1	-0.0189779
1_1	3	0.0323944	6	3	0.0547148	5	3	0.133815	6	2	-0.0134323
2_1	1	0.0416527	7	1	0.0337615	6	1	0.0888525	6	3	-0.00294035
2_1	2	-0.0069968	7	2	-0.0300437	6	2	0.0562011	7	1	0.0261
2_1	3	0.0675414	7	3	-0.0103884	6	3	0.0423674	7	2	0.0598518
3_1	1	0.0958717	9	1	-0.0182512	8	1	0.0678911	7	3	0.0246861
3_1	2	0.0746079	9	2	0.0390143	8	2	0.0755338	9	1	0.00764838
3_1	3	0.0769223	9	3	0.0476869	8	3	0.081287	9	2	0.0134642
4_1	1	0.0821335	21	1	0.117671	9	1	0.0304541	9	3	0.035641
4_1	2	0.0624771	21	3	0.0166135	9	2	0.0473705	10	1	-0.226839
4_1	3	0.0748882	21	2	0.11629	9	3	0.050813	10	2	-0.0292872
5_1	1	0.0402755	24	1	0.0161055	10	1	0.0584931	10	3	0.0117988
5_1	2	0.00815325	24	2	0.0359572	10	2	0.0936643	10	4	0.159568
5_1	3	0.0421437	24	3	0.101459	10	3	0.158004	21	2	0.0562817
			25	1	0.0327501	12	1	-0.0216449	21	1	-0.0043983
			25	2	0.0674388	12	2	0.0661923	21	3	0.0482145
			25	3	0.0914983	12	3	0.0772654	23	1	-0.0180671
									23	2	0.0147899
									23	3	-0.00406965

## Sheet: M Statistics
Figure 2M - Statistical analysis
Tests of Relative PSB Myosin II Fluorescence Intensities Between WT and wgCX4 embryos
Stage 8
wgCX4 mean (0.05502) is greater than WT mean (0.03639).
Therefore, one-tailed test cannot be significant for this comparison.
Stage 9
One-tailed unpaired t-test with equal variances				F test of equal variances			D'Agostino & Pearson omnibus normality test
p	0.0003			F	1.517			WT	wgCX4
t	3.621			DFn	31		K2	3.187	0.002788
df	60			DFd	29		p	0.2032	0.9986
				p	0.2628
Stage 10
One-tailed unpaired t-test with equal variances				F test of equal variances			D'Agostino & Pearson omnibus normality test
p	0.001			F	2.055			WT	wgCX4
t	3.234			DFn	29		K2	1.541	0.4191
df	57			DFd	28		p	0.4628	0.8109
				p	0.0602
Stage 11
One-tailed Mann-Whitney test
p	0.0002		D'Agostino & Pearson omnibus normality test
Sum of ranks WT	1039			WT	wgCX4
Sum of ranks wgCX4	731		K2	0.03047	32.62
Mann-Whitney U	203		p	0.9849	<0.0001
N values
	WT	wgCX4
Stage 8	31	27
Stage 9	32	30
Stage 10	29	30
Stage 11	27	32
