# Supplementary material for: Unipolar distributions of junctional Myosin II identify cell stripe boundaries that drive cell intercalation throughout Drosophila axis extension
Source: eLife journal article supplement (doi:10.7554/elife.12094), 2016-05-16
Supplement: supp [file elife-12094-supp-v1.zip › elife_poa_e12094_Figure_3_source_data_1.xlsx]

## Sheet: D
Figure 3D	Cells per parasegment width
	Expected number of cells per PS width
Time after GBE onset (mins)	lower CI	Mean	upper CI	N
-20	3.31572	3.71055	4.10538	1630
-19	3.31743	3.70993	4.10244	2044
-18	3.32059	3.71	4.09942	2466
-17	3.32017	3.70706	4.09395	2881
-16	3.37779	3.71773	4.05767	3089
-15	3.37479	3.67935	3.9839	3303
-14	3.37946	3.67911	3.97876	3523
-13	3.38767	3.68137	3.97508	3735
-12	3.39071	3.68155	3.9724	3957
-11	3.39135	3.6815	3.97166	4164
-10	3.39761	3.68709	3.97658	4386
-9	3.40175	3.69318	3.98462	4454
-8	3.40797	3.70023	3.99248	4510
-7	3.40813	3.70161	3.99509	4569
-6	3.4081	3.70358	3.99906	4621
-5	3.40402	3.70098	3.99795	4675
-4	3.39757	3.69551	3.99345	4792
-3	3.38758	3.68588	3.98418	4979
-2	3.38763	3.68388	3.98013	5201
-1	3.39075	3.68593	3.9811	5471
0	3.40125	3.69387	3.9865	5802
1	3.41581	3.70649	3.99717	6192
2	3.43658	3.72517	4.01376	6625
3	3.4646	3.75061	4.03662	7055
4	3.50059	3.78642	4.07226	7475
5	3.53553	3.82074	4.10594	7899
6	3.57766	3.86353	4.14941	8339
7	3.62297	3.90962	4.19627	8776
8	3.67146	3.96076	4.25006	9197
9	3.72011	4.01421	4.3083	9593
10	3.77375	4.07212	4.37048	10006
11	3.8306	4.13404	4.43748	10390
12	3.89476	4.2051	4.51545	10768
13	3.96159	4.27998	4.59836	11110
14	4.03201	4.35907	4.68614	11464
15	4.10369	4.44025	4.77682	11822
16	4.18246	4.52642	4.87039	12153
17	4.26179	4.61474	4.96768	12516
18	4.34587	4.70986	5.07384	12923
19	4.43654	4.81033	5.18412	13370
20	4.5292	4.91456	5.29993	13831
21	4.6257	5.02245	5.4192	14267
22	4.72132	5.1289	5.53649	14670
23	4.81492	5.23824	5.66157	15183
24	4.91518	5.35374	5.79231	15617
25	5.01016	5.46645	5.92273	16053
26	5.09986	5.57316	6.04646	16383
27	5.18176	5.67178	6.1618	16787
28	5.25902	5.76715	6.27528	17108
29	5.33573	5.8614	6.38706	17446
30	5.41059	5.95219	6.49379	17655
31	5.48049	6.0363	6.5921	17873
32	5.54497	6.11273	6.6805	18005
33	5.60532	6.183	6.76067	18088
34	5.67325	6.26004	6.84684	17975
35	5.73491	6.33321	6.93152	17975
36	5.79181	6.40311	7.0144	17903
37	5.84552	6.46709	7.08867	17791
38	5.8972	6.52901	7.16083	17564
39	5.94802	6.58953	7.23103	17274
40	5.99774	6.64843	7.29912	16927
41	6.04083	6.70425	7.36766	16587
42	6.08593	6.75746	7.42898	16092
43	6.1245	6.80229	7.48009	15654
44	6.16024	6.84754	7.53484	15228
45	6.19195	6.89013	7.58832	14797
46	6.23064	6.9367	7.64277	14253
47	6.2719	6.98546	7.69903	13795
48	6.30731	7.029	7.75069	13426
49	6.33646	7.06766	7.79887	13155
50	6.37783	7.11688	7.85593	12794
51	6.41504	7.16189	7.90875	12401
52	6.45161	7.20541	7.95921	12033
53	6.48098	7.23952	7.99805	11738
54	6.50519	7.27352	8.04186	11313
55	6.52224	7.29741	8.07258	10739
56	6.54144	7.32593	8.11042	10252
57	6.54196	7.33293	8.1239	9222
58	6.54648	7.34041	8.13433	7581
59	6.54523	7.34171	8.13818	6003
60	6.52813	7.33694	8.14575	4529
