# Supplementary material for: Unipolar distributions of junctional Myosin II identify cell stripe boundaries that drive cell intercalation throughout Drosophila axis extension
Source: eLife journal article supplement (doi:10.7554/elife.12094), 2016-05-16
Supplement: supp [file elife-12094-supp-v1.zip › elife_poa_e12094_Figure_3_source_data_2.xlsx]

## Sheet: D
Figure 3-figure supplement 1D: Myosin bipolarity vs within-PS AP coordinate
	-20 to -5 mins				0 to 20 mins				0-20 vs -20--5	20 to 40 mins				20-40 vs -20--5	40 to 60 mins				40-60 vs -20--5
Within-PS AP coord (bin centres, normalised coordinates 0-1)	lower CI	Mean	upper CI	N	lower CI	Mean	upper CI	N	P-value	lower CI	Mean	upper CI	N	P-value	lower CI	Mean	upper CI	N	P-value
0.0099902	-0.00290799	0.00457769	0.0120634	551	-0.000908404	0.015034	0.0309763	1386	0.000146186	-0.00284503	0.00360996	0.0100649	2680	0.397181	-0.00237218	0.00390194	0.0101761	2283	0.789574
0.0299906	-0.0030827	0.0043702	0.0118231	759	-0.000217532	0.0155943	0.0314061	2081	0.00444147	-0.00307747	0.00413462	0.0113467	3682	0.252846	-0.00265173	0.00493384	0.0125194	3022	0.158323
0.049991	-0.00251721	0.00577988	0.014077	983	0.000982703	0.0165234	0.0320642	2762	0.0155828	-0.00319562	0.00503511	0.0132658	4618	0.0127624	-0.00265447	0.0063595	0.0153735	3733	0.00158984
0.0699914	-0.00295983	0.00628695	0.0155337	1147	0.00172122	0.0173841	0.033047	3490	0.000101266	-0.00303712	0.00597587	0.0149889	5584	0.422578	-0.00222192	0.00721696	0.0166558	4438	0.190853
0.0899918	-0.00313468	0.0063577	0.0158501	1196	0.00241719	0.0181353	0.0338533	3890	4.58e-07	-0.00287584	0.00661846	0.0161128	6222	0.186556	-0.00232374	0.00720379	0.0167313	5001	0.0119133
0.109992	-0.00329355	0.00604663	0.0153868	1183	0.0031582	0.0197395	0.0363208	4204	1.27e-05	-0.00284359	0.00788442	0.0186124	6623	0.244228	-0.00247551	0.00724164	0.0169588	5185	0.0275316
0.129993	-0.00313253	0.00584628	0.0148251	1216	0.00352417	0.0202982	0.0370722	4339	0.000509468	-0.00242622	0.00876927	0.0199648	6617	0.509046	-0.00249953	0.00744386	0.0173872	4938	0.215917
0.149993	-0.00296339	0.00621094	0.0153853	1159	0.00424288	0.020721	0.0371992	4183	1.88e-06	-0.00226095	0.00915892	0.0205788	6264	0.280429	-0.00274795	0.00709066	0.0169293	4545	0.850137
0.169993	-0.00209619	0.00721638	0.016529	1080	0.00463194	0.0209845	0.0373371	3871	3.24e-10	-0.00225729	0.00901918	0.0202956	6025	0.000361562	-0.00268916	0.00658796	0.0158651	4459	0.0866162
0.189994	-0.00310056	0.00599044	0.0150815	977	0.00403509	0.0203313	0.0366276	3590	2.38e-07	-0.00239657	0.00836583	0.0191282	5784	0.00315969	-0.00261586	0.0052403	0.0130965	4460	0.0807328
0.209994	-0.0030034	0.0054132	0.0138298	899	0.00297599	0.0189919	0.0350079	3289	0.00121446	-0.00263609	0.00748978	0.0176157	5402	0.872484	-0.00288009	0.00382592	0.0105319	4282	0.017058
0.229995	-0.00357779	0.00458821	0.0127542	902	0.00170952	0.0174158	0.0331222	3065	0.000338871	-0.00269541	0.0068109	0.0163172	5094	0.1112	-0.0024734	0.0036312	0.00973579	4093	0.505986
0.249995	-0.00301435	0.00553942	0.0140932	897	-0.000329043	0.0149396	0.0302083	2914	0.00993397	-0.00237252	0.00512966	0.0126319	4944	0.428616	-0.00203697	0.00389157	0.0098201	4040	0.549412
0.269995	-0.00260142	0.00689618	0.0163938	890	-0.0010355	0.0133325	0.0277004	2857	0.325276	-0.00234489	0.00438727	0.0111194	4838	0.00197079	-0.00190694	0.00444991	0.0108068	4170	0.000209663
0.289996	-0.00320166	0.00584557	0.0148928	997	-0.000836195	0.0127704	0.026377	3028	2.11e-05	-0.00227394	0.00466761	0.0116092	4817	0.602649	-0.00176896	0.00468216	0.0111333	4141	0.190772
0.309996	-0.00304901	0.00661185	0.0162727	1070	-0.00109721	0.0123762	0.0258497	3223	0.0741749	-0.00212501	0.00520019	0.0125254	4883	0.109326	-0.00181196	0.00483276	0.0114775	4092	0.704044
0.329997	-0.00228595	0.0065802	0.0154464	1140	-0.000556969	0.012958	0.026473	3392	0.426148	-0.00203924	0.00576368	0.0135666	5135	0.0251505	-0.00229004	0.00524921	0.0127885	4030	0.052736
0.349997	-0.00216458	0.00598802	0.0141406	1216	0.000135494	0.0137997	0.0274639	3490	2.04e-07	-0.00207906	0.00613925	0.0143576	5390	0.00696294	-0.00238515	0.00527319	0.0129315	4148	0.797794
0.369997	-0.0018089	0.00608308	0.0139751	1186	0.000222238	0.0148646	0.029507	3586	0.000841032	-0.0021561	0.00670567	0.0155674	5525	0.121857	-0.0027288	0.00509851	0.0129258	4187	0.762752
0.389998	-0.00171294	0.00589138	0.0134957	1138	0.00132972	0.015292	0.0292543	3595	9.92e-08	-0.00212484	0.00702426	0.0161734	5596	1.93e-05	-0.00298251	0.00477179	0.0125261	4283	0.00638524
0.409998	-0.00134604	0.00603661	0.0134193	1086	0.00178158	0.0159697	0.0301579	3629	2.72e-07	-0.00213486	0.00731471	0.0167643	5574	0.017127	-0.0031036	0.00435997	0.0118235	4304	0.455148
0.429999	-0.000617197	0.00679824	0.0142137	1069	0.00210026	0.0162737	0.0304471	3796	7.73e-05	-0.00228525	0.00701599	0.0163172	6141	0.0133796	-0.00332149	0.00478396	0.0128894	4837	0.27404
0.449999	-0.000470637	0.00619167	0.012854	1006	0.00260454	0.0168261	0.0310478	3745	6.27e-05	-0.00253744	0.00671847	0.0159744	6136	0.0188494	-0.00320272	0.00488704	0.0129768	4900	0.0371643
0.469999	-0.00187498	0.00555888	0.0129927	973	0.00239255	0.017213	0.0320334	3738	0.0171871	-0.0027228	0.00659045	0.0159037	5927	0.40304	-0.00296692	0.00477091	0.0125088	4857	0.390291
0.49	-0.00173979	0.00596494	0.0136697	979	0.00203302	0.0168669	0.0317009	3756	8.12e-09	-0.00260648	0.00666977	0.015946	5861	0.104398	-0.00293427	0.00536162	0.0136575	4782	0.124768
0.51	-0.00203321	0.00595668	0.0139466	1021	0.0019435	0.0162561	0.0305687	3690	0.000317183	-0.0028175	0.00639318	0.0156039	5915	0.964639	-0.00282661	0.00546338	0.0137534	4756	0.490267
0.530001	-0.0020574	0.00596871	0.0139948	1051	0.00176004	0.0156549	0.0295498	3694	5.71e-09	-0.00259759	0.00650655	0.0156107	5876	0.202505	-0.0025729	0.00554707	0.013667	4712	0.0782262
0.550001	-0.00189956	0.00496706	0.0118337	1102	0.00184253	0.0163496	0.0308566	3764	4.26e-06	-0.00244209	0.00683444	0.016111	5891	0.0657536	-0.00266237	0.00565471	0.0139718	4780	0.121623
0.570001	-0.00163476	0.00508064	0.011796	1060	0.0020079	0.0167347	0.0314615	3579	0.00826051	-0.00213036	0.00804254	0.0182155	5338	0.753787	-0.00240678	0.00581108	0.0140289	4252	0.600013
0.590002	-0.000981399	0.00512382	0.011229	1097	0.00188834	0.0165537	0.031219	3561	0.000412834	-0.00188782	0.00827993	0.0184477	5318	0.0829635	-0.00252511	0.00552701	0.0135791	4116	0.955265
0.610002	-0.000342227	0.00553652	0.0114153	1153	0.0019138	0.0161153	0.0303167	3400	1.91e-09	-0.00182002	0.00849504	0.0188101	5333	0.000272007	-0.00259422	0.00511435	0.0128229	4075	0.174643
0.630003	-0.000974563	0.00453611	0.0100468	1127	0.00198396	0.0159525	0.029921	3310	1.03e-06	-0.00175549	0.00878016	0.0193158	5367	0.00107619	-0.00251433	0.00469169	0.0118977	4161	0.0393012
0.650003	-0.0014502	0.00338162	0.00821343	1091	0.00195532	0.0151903	0.0284252	3296	8.6e-05	-0.00133147	0.00913912	0.0196097	5371	0.0230292	-0.00232187	0.00470785	0.0117376	4237	0.793766
0.670003	-0.00275157	0.00296389	0.00867934	1068	0.0018216	0.0152307	0.0286398	3307	3.48e-05	-0.00151866	0.00882549	0.0191696	5361	0.0242865	-0.00233307	0.00494112	0.0122153	4290	0.792951
0.690004	-0.00321087	0.00363389	0.0104786	1006	0.00155029	0.0147564	0.0279624	3256	1.95e-05	-0.00189803	0.00840419	0.0187064	5382	0.0031872	-0.002354	0.00492731	0.0122086	4235	0.0686241
0.710004	-0.00391958	0.00352936	0.0109783	940	0.00111695	0.014448	0.027779	3053	2.89e-06	-0.00231944	0.00781855	0.0179566	5431	0.000358176	-0.00219338	0.00495285	0.0120991	4201	0.000224595
0.730005	-0.00547597	0.00366763	0.0128112	880	0.000980521	0.0150312	0.0290819	2920	0.0121134	-0.00252601	0.00777036	0.0180667	5376	0.790037	-0.00232074	0.00513259	0.0125859	4206	0.935454
0.750005	-0.00567736	0.00459486	0.0148671	796	0.00125262	0.0160274	0.0308022	2939	0.000659853	-0.0025573	0.00732674	0.0172108	5255	0.233684	-0.00219947	0.00567023	0.0135399	4192	0.469695
0.770005	-0.00502752	0.00592708	0.0168817	783	0.00187841	0.0177209	0.0335634	2992	0.00334725	-0.00235302	0.00732335	0.0169997	5060	0.0254544	-0.0020028	0.00585978	0.0137224	4028	0.758769
0.790006	-0.00421105	0.00654624	0.0173035	833	0.00290562	0.0190703	0.035235	3208	0.0307354	-0.00178715	0.00821376	0.0182147	5010	0.643572	-0.00189623	0.00623678	0.0143698	4001	0.240497
0.810006	-0.00376612	0.0064248	0.0166157	903	0.00340257	0.0194896	0.0355766	3526	0.00031313	-0.0013504	0.00932904	0.0200085	5081	0.0279972	-0.00183564	0.00653294	0.0149015	3957	0.924033
0.830007	-0.00393172	0.00629355	0.0165188	1042	0.00371339	0.019408	0.0351026	3772	1.14e-05	-0.000894672	0.00990602	0.0207067	5428	0.216969	-0.00161116	0.00706137	0.0157339	3982	0.825639
0.850007	-0.00340589	0.00612461	0.0156551	1208	0.00378371	0.0193013	0.034819	4087	6.37e-08	-0.000783384	0.00942062	0.0196246	5578	2.7e-06	-0.00196196	0.00681247	0.0155869	4102	0.00919178
0.870007	-0.0030773	0.00616509	0.0154075	1273	0.00397876	0.0190532	0.0341276	4197	3.93e-07	-0.000730798	0.00938702	0.0195048	5797	8.12e-05	-0.00200141	0.00634819	0.0146978	4392	0.0278096
0.890008	-0.00295772	0.00550293	0.0139636	1279	0.00355219	0.0178482	0.0321441	4112	4.27e-07	-0.000876162	0.00918528	0.0192467	5942	0.00806565	-0.00206981	0.00576622	0.0136023	4620	0.0851564
0.910008	-0.00334148	0.00455588	0.0124532	1265	0.00318585	0.0166114	0.030037	3869	7.07e-11	-0.00108573	0.00881979	0.0187253	5843	0.0311064	-0.00221481	0.00541045	0.0130357	4495	0.321752
0.930009	-0.00362067	0.00434683	0.0123143	1201	0.00268788	0.015952	0.0292162	3395	0.000334544	-0.00162114	0.00768583	0.0169928	5302	0.161761	-0.00232022	0.00499485	0.0123099	4047	0.315939
0.950009	-0.00370439	0.00433288	0.0123702	1033	0.002342	0.015381	0.0284201	2645	0.00322282	-0.00189591	0.00672195	0.0153398	4534	0.865432	-0.00252337	0.0044141	0.0113516	3445	0.211165
0.970009	-0.00272168	0.00417481	0.0110713	782	0.00163301	0.0142596	0.0268863	1922	0.000791028	-0.0020812	0.00540259	0.0128864	3454	0.105037	-0.00280595	0.00342363	0.00965321	2756	0.995353
0.99001	-0.00280578	0.00462405	0.0120539	534	0.000398507	0.0120405	0.0236825	1250	0.000855772	-0.00228569	0.00475855	0.0118028	2458	0.00559662	-0.00206963	0.00265521	0.00738005	2057	0.190769

## Sheet: E
Figure 3-figure supplement 1E: Myosin Unipolarity vs within-PS AP coordinate
	-20 to -5 mins				0 to 20 mins				0-20 vs -20--5	20 to 40 mins				20-40 vs -20--5	40 to 60 mins				40-60 vs -20--5
Within-PS AP coord (bin centres, normalised coordinates 0-1)	lower CI	Mean	upper CI	N	lower CI	Mean	upper CI	N	P-value	lower CI	Mean	upper CI	N	P-value	lower CI	Mean	upper CI	N	P-value
0.0099902	-0.096354	-0.0338692	0.0286156	551	-0.0188033	0.0274934	0.07379	1386	0.000990046	0.02997	0.0805428	0.131116	2680	1.79e-05	0.0414758	0.099457	0.157438	2283	0.00204145
0.0299906	-0.0931198	-0.03047	0.0321798	759	-0.0191582	0.0277407	0.0746396	2081	6.62e-07	0.0349798	0.0861841	0.137388	3682	4.83e-12	0.0394521	0.0975643	0.155676	3022	3.94e-18
0.049991	-0.0965785	-0.0357692	0.0250401	983	-0.0218875	0.0259339	0.0737554	2762	5.7e-12	0.0302771	0.081745	0.133213	4618	6.36e-29	0.0336849	0.0918562	0.150028	3733	3.98e-29
0.0699914	-0.0906652	-0.0316349	0.0273954	1147	-0.021601	0.0250073	0.0716155	3490	0.00304025	0.0268657	0.0785259	0.130186	5584	8e-22	0.0263587	0.0835437	0.140729	4438	4.03e-21
0.0899918	-0.0859795	-0.030345	0.0252895	1196	-0.024083	0.0218485	0.06778	3890	1.41e-10	0.0225648	0.0737721	0.124979	6222	9.07e-43	0.0165464	0.0732174	0.129888	5001	4.34e-35
0.109992	-0.0846218	-0.0300974	0.0244269	1183	-0.0256687	0.0198027	0.065274	4204	8.23e-09	0.011691	0.0635352	0.115379	6623	1.2e-27	0.0029834	0.058914	0.114845	5185	1.19e-25
0.129993	-0.0757407	-0.0264155	0.0229097	1216	-0.0300363	0.0146574	0.0593511	4339	1.45e-06	-0.00437469	0.0493871	0.103149	6617	4.17e-13	-0.0134277	0.0429637	0.0993551	4938	1.63e-08
0.149993	-0.0739097	-0.0269131	0.0200835	1159	-0.0329501	0.0104032	0.0537564	4183	0.012106	-0.0251011	0.0296618	0.0844246	6264	8.09e-05	-0.0361839	0.0186993	0.0735826	4545	0.0634282
0.169993	-0.0696242	-0.0260907	0.0174428	1080	-0.0382008	0.00424073	0.0466822	3871	0.000618684	-0.0445454	0.0092373	0.06302	6025	0.0906399	-0.0546286	-0.0032182	0.0481922	4459	0.4581
0.189994	-0.06191	-0.0196791	0.0225517	977	-0.0439081	-0.00244366	0.0390208	3590	0.410409	-0.0602253	-0.0075225	0.0451803	5784	0.0698926	-0.0658562	-0.0195569	0.0267423	4460	0.00997633
0.209994	-0.0565914	-0.0153285	0.0259344	899	-0.0548844	-0.0126664	0.0295515	3289	0.214042	-0.0748245	-0.0242112	0.0264021	5402	0.0540716	-0.0730307	-0.029135	0.0147607	4282	0.00178384
0.229995	-0.0695052	-0.0205827	0.0283399	902	-0.0630589	-0.0209927	0.0210735	3065	0.750979	-0.0844747	-0.034782	0.0149108	5094	0.0163859	-0.074745	-0.0314101	0.0119247	4093	0.00981482
0.249995	-0.0568748	-0.00725904	0.0423567	897	-0.0717531	-0.0282257	0.0153017	2914	0.399133	-0.0854699	-0.0366528	0.0121642	4944	0.0138787	-0.071265	-0.0289942	0.0132766	4040	0.23151
0.269995	-0.0567932	-0.00209225	0.0526087	890	-0.0733637	-0.0291535	0.0150568	2857	0.00756052	-0.0801869	-0.031126	0.017935	4838	1.38e-05	-0.0626479	-0.0186314	0.025385	4170	0.0235283
0.289996	-0.0622472	-0.00844011	0.045367	997	-0.073077	-0.0293971	0.0142828	3028	0.0871832	-0.0703703	-0.0206732	0.0290239	4817	0.0985598	-0.0533982	-0.00902891	0.0353404	4141	0.478327
0.309996	-0.0617912	-0.00989485	0.0420015	1070	-0.0702317	-0.0273406	0.0155506	3223	0.000147984	-0.0620295	-0.0142253	0.0335789	4883	0.19393	-0.0433054	-0.00124129	0.0408228	4092	0.72486
0.329997	-0.0606363	-0.00962722	0.0413819	1140	-0.0639926	-0.0232964	0.0173999	3392	0.00255871	-0.0483707	-0.00196505	0.0444406	5135	0.712477	-0.0355736	0.00539009	0.0463538	4030	0.0505729
0.349997	-0.0613592	-0.0114884	0.0383823	1216	-0.0558738	-0.0170149	0.021844	3490	0.177858	-0.0375494	0.00720248	0.0519543	5390	4.18e-05	-0.0303313	0.00939805	0.0491274	4148	2.58e-05
0.369997	-0.0588009	-0.0110421	0.0367167	1186	-0.0490098	-0.011222	0.0265659	3586	0.983883	-0.0307562	0.0120108	0.0547777	5525	0.355826	-0.0278569	0.0116407	0.0511383	4187	0.00392161
0.389998	-0.0594008	-0.0133244	0.032752	1138	-0.0422083	-0.00661937	0.0289695	3595	0.0115977	-0.0306947	0.0120404	0.0547755	5596	4.44e-09	-0.028923	0.01074	0.050403	4283	4.52e-06
0.409998	-0.0635401	-0.0206392	0.0222616	1086	-0.0398161	-0.0052272	0.0293617	3629	0.312678	-0.0337132	0.00891243	0.051538	5574	0.0159415	-0.0338989	0.00373653	0.041372	4304	0.0351429
0.429999	-0.0622482	-0.0201967	0.0218548	1069	-0.036637	-0.00202389	0.0325892	3796	0.0152775	-0.0424037	-0.000405861	0.041592	6141	0.00616065	-0.0406545	-0.00310666	0.0344412	4837	0.000203741
0.449999	-0.0679632	-0.0212072	0.0255488	1006	-0.0345143	-0.000534992	0.0334444	3745	0.662109	-0.0455088	-0.00355116	0.0384065	6136	0.524673	-0.0439698	-0.00505312	0.0338636	4900	0.709576
0.469999	-0.0666574	-0.0166817	0.033294	973	-0.0360473	-0.0011681	0.0337111	3738	0.489425	-0.0499289	-0.00864925	0.0326304	5927	0.807331	-0.0468922	-0.0064638	0.0339646	4857	0.769178
0.49	-0.0712934	-0.0180764	0.0351407	979	-0.0381988	-0.00319888	0.0318011	3756	0.892546	-0.0549093	-0.0143436	0.0262221	5861	0.0685298	-0.0517442	-0.00988165	0.0319809	4782	0.930993
0.51	-0.0677203	-0.0169788	0.0337628	1021	-0.0419963	-0.00621431	0.0295677	3690	0.0177551	-0.0573123	-0.0165739	0.0241644	5915	0.880144	-0.0569784	-0.0144722	0.028034	4756	0.151163
0.530001	-0.0676859	-0.0164046	0.0348767	1051	-0.0428581	-0.0069413	0.0289755	3694	0.406028	-0.0573517	-0.0169355	0.0234807	5876	0.0424042	-0.0551352	-0.0127336	0.0296681	4712	0.180167
0.550001	-0.0658925	-0.0156471	0.0345982	1102	-0.0444145	-0.00758365	0.0292472	3764	0.221363	-0.054644	-0.0147697	0.0251046	5891	0.6155	-0.0504048	-0.00825333	0.0338981	4780	0.638418
0.570001	-0.067976	-0.0183819	0.0312121	1060	-0.044976	-0.00805742	0.0288611	3579	0.931973	-0.0473112	-0.00821622	0.0308788	5338	0.416887	-0.045501	-0.00398379	0.0375335	4252	0.282179
0.590002	-0.0653685	-0.017292	0.0307845	1097	-0.0448254	-0.00818046	0.0284645	3561	0.439616	-0.0408708	-0.00260316	0.0356645	5318	0.695178	-0.0407089	0.000388343	0.0414856	4116	0.0599086
0.610002	-0.0607853	-0.0164837	0.0278179	1153	-0.0433489	-0.00754793	0.0282531	3400	0.840019	-0.0399967	-0.0016877	0.0366213	5333	0.227132	-0.0358222	0.00380954	0.0434412	4075	0.00051145
0.630003	-0.0560954	-0.0143347	0.027426	1127	-0.041795	-0.00589635	0.0300023	3310	0.0531567	-0.0384046	0.000426091	0.0392568	5367	0.00013146	-0.0290065	0.00849397	0.0459945	4161	9.48e-06
0.650003	-0.0615589	-0.0167965	0.0279659	1091	-0.0391673	-0.00378995	0.0315874	3296	0.0198125	-0.0373434	0.00199433	0.0413321	5371	1.04e-05	-0.0232483	0.0130046	0.0492576	4237	6.36e-08
0.670003	-0.0668847	-0.0201601	0.0265646	1068	-0.0376265	-0.00188718	0.0338521	3307	0.273237	-0.0340825	0.00638757	0.0468576	5361	0.872358	-0.0231479	0.0141475	0.051443	4290	0.0150249
0.690004	-0.0816865	-0.0304629	0.0207606	1006	-0.035431	-0.000573249	0.0342845	3256	0.260773	-0.0319418	0.00824136	0.0484245	5382	0.355425	-0.025111	0.0130336	0.0511782	4235	0.00221587
0.710004	-0.091216	-0.0359523	0.0193113	940	-0.0356149	-0.00100473	0.0336055	3053	0.436899	-0.0340182	0.00571815	0.0454545	5431	0.546084	-0.0273895	0.0112187	0.0498269	4201	0.824652
0.730005	-0.0851262	-0.0287373	0.0276516	880	-0.0393168	-0.00385376	0.0316092	2920	0.000721285	-0.0377387	0.00227287	0.0422844	5376	3.9e-05	-0.0285743	0.00950673	0.0475878	4206	0.00215091
0.750005	-0.090164	-0.029849	0.030466	796	-0.0443053	-0.00820546	0.0278944	2939	1.57e-07	-0.038521	0.00142877	0.0413785	5255	2.11e-13	-0.029057	0.00888266	0.0468223	4192	8.66e-10
0.770005	-0.0876161	-0.0287265	0.0301631	783	-0.0491975	-0.0133359	0.0225257	2992	6.97e-08	-0.0397049	0.000122588	0.03995	5060	1.93e-09	-0.029615	0.0101365	0.049888	4028	3.91e-08
0.790006	-0.0771099	-0.0256487	0.0258125	833	-0.0560542	-0.0199702	0.0161137	3208	0.0790004	-0.0407697	-0.0022858	0.0361982	5010	0.632874	-0.0292741	0.011112	0.0514981	4001	0.442305
0.810006	-0.071199	-0.0229695	0.0252599	903	-0.060415	-0.0253483	0.00971842	3526	0.848001	-0.0474839	-0.0106275	0.0262289	5081	0.390947	-0.0371649	0.00392373	0.0450123	3957	0.0518251
0.830007	-0.0651866	-0.0212361	0.0227143	1042	-0.0631337	-0.0285007	0.00613239	3772	0.000621051	-0.0618342	-0.0235424	0.0147494	5428	0.00256776	-0.0486715	-0.00704871	0.0345741	3982	0.975555
0.850007	-0.0570038	-0.0170429	0.022918	1208	-0.0628434	-0.0279301	0.00698322	4087	0.000914585	-0.0734009	-0.0341865	0.00502787	5578	0.150526	-0.0580712	-0.0153875	0.0272963	4102	0.0355883
0.870007	-0.0554838	-0.0202474	0.0149891	1273	-0.0623139	-0.02788	0.00655389	4197	0.0432765	-0.0796157	-0.0397847	4.63e-05	5797	0.0272256	-0.0676433	-0.0242602	0.0191229	4392	0.0571351
0.890008	-0.0566719	-0.0230253	0.0106213	1279	-0.0624458	-0.0282526	0.00594064	4112	0.30806	-0.0828915	-0.0433858	-0.00388018	5942	4.17e-05	-0.0805478	-0.0352615	0.0100247	4620	0.000430249
0.910008	-0.0637826	-0.0282789	0.0072248	1265	-0.0609842	-0.0270095	0.00696522	3869	0.872002	-0.0845689	-0.0450435	-0.00551815	5843	6.6e-11	-0.0878043	-0.0437684	0.000267431	4495	1.41e-06
0.930009	-0.0630071	-0.0258993	0.0112086	1201	-0.0577322	-0.024302	0.00912821	3395	0.101987	-0.0891763	-0.0491936	-0.00921087	5302	0.000426037	-0.094947	-0.0519707	-0.00899441	4047	5.9e-10
0.950009	-0.0642035	-0.0267689	0.0106657	1033	-0.0561472	-0.0229824	0.0101824	2645	0.198429	-0.091977	-0.0515672	-0.0111575	4534	0.51657	-0.0984309	-0.0557295	-0.013028	3445	0.000141318
0.970009	-0.0541705	-0.0166999	0.0207708	782	-0.0536174	-0.0205404	0.0125366	1922	0.470595	-0.0898812	-0.049761	-0.00964089	3454	0.179625	-0.100854	-0.0574485	-0.0140431	2756	1.14e-07
0.99001	-0.0605851	-0.0204592	0.0196668	534	-0.0546448	-0.0220549	0.010535	1250	0.000458208	-0.0846054	-0.0448049	-0.00500438	2458	4.11e-05	-0.105326	-0.0617601	-0.0181938	2057	0.00013199
