# Supplementary material for: Unipolar distributions of junctional Myosin II identify cell stripe boundaries that drive cell intercalation throughout Drosophila axis extension
Source: eLife journal article supplement (doi:10.7554/elife.12094), 2016-05-16
Supplement: supp [file elife-12094-supp-v1.zip › elife_poa_e12094_Figure_4_source_data_1.xlsx]

## Sheet: D
Figure 4D	Cells per stripe width vs Time
	S1				S2				S1 vs S2	S3				S3 vs S1	S3 vs S2
Time after GBE onset (mins)	lower CI	Mean	upper CI	N	lower CI	Mean	upper CI	N	P-value	lower CI	Mean	upper CI	N	P-value	P-value
-20	0.790451	1.24362	1.69679	438	1.05484	1.24692	1.43899	455	0.0993982	1.46668	1.70587	1.94507	701	1.33e-05	2.17e-23
-19	0.794541	1.23882	1.6831	548	1.0524	1.24572	1.43904	580	0.301095	1.46859	1.70913	1.94967	883	9.47e-07	1.59e-19
-18	0.859808	1.24511	1.63041	679	1.05295	1.24436	1.43577	697	0.202505	1.40381	1.62047	1.83714	1085	2.07e-06	2.95e-23
-17	0.872185	1.24738	1.62257	807	1.0224	1.19341	1.36441	828	0.208191	1.40749	1.62523	1.84298	1283	3e-06	4.14e-23
-16	0.89909	1.21998	1.54087	881	1.06123	1.22024	1.37925	917	0.200534	1.40208	1.60461	1.80714	1392	5.59e-08	1.09e-24
-15	0.940387	1.24296	1.54554	961	1.05165	1.21259	1.37353	997	0.227056	1.40415	1.6101	1.81606	1492	2.63e-09	1.24e-24
-14	0.974151	1.25785	1.54155	1044	1.04526	1.20876	1.37227	1076	0.109708	1.40658	1.61557	1.82457	1598	6.36e-10	3.92e-28
-13	0.998646	1.2638	1.52895	1124	1.04483	1.21054	1.37625	1151	0.912152	1.40229	1.61299	1.8237	1703	7.51e-17	9.66e-22
-12	1.01355	1.26916	1.52477	1207	1.04246	1.20939	1.37633	1225	0.180771	1.3995	1.6116	1.82371	1809	1.37e-13	3.09e-23
-11	1.0267	1.27715	1.5276	1265	1.04072	1.21051	1.3803	1305	0.208696	1.3933	1.60703	1.82075	1890	2.48e-12	3.42e-22
-10	1.03103	1.27815	1.52527	1333	1.04495	1.21684	1.38872	1382	0.291426	1.3902	1.60342	1.81664	1978	1.2e-11	1.09e-20
-9	1.03428	1.28354	1.5328	1356	1.05058	1.22247	1.39435	1399	0.240117	1.38956	1.60282	1.81608	1999	2.64e-11	2.59e-21
-8	1.04151	1.28957	1.53763	1373	1.05815	1.23006	1.40198	1422	0.407681	1.38609	1.59829	1.81049	2028	2.86e-10	2.79e-17
-7	1.04771	1.29485	1.54199	1388	1.06014	1.23283	1.40552	1439	0.631947	1.38138	1.59213	1.80288	2056	9.2e-12	2.45e-18
-6	1.0522	1.29892	1.54564	1408	1.06136	1.23354	1.40572	1454	0.365828	1.3773	1.58669	1.79609	2072	3.33e-11	8.62e-20
-5	1.05759	1.30431	1.55103	1438	1.06379	1.23451	1.40524	1471	0.1259	1.37492	1.58246	1.79001	2098	4.53e-09	4.11e-18
-4	1.06442	1.31069	1.55696	1489	1.06111	1.23027	1.39943	1500	0.0523503	1.37397	1.58009	1.78621	2137	1.75e-07	1.28e-17
-3	1.0686	1.31376	1.55893	1541	1.05673	1.22374	1.39075	1542	0.0955324	1.368	1.57267	1.77734	2199	2.19e-07	4.92e-17
-2	1.07007	1.31306	1.55606	1606	1.05237	1.21696	1.38155	1607	0.030204	1.36117	1.56031	1.75945	2264	1.05e-07	4.05e-20
-1	1.06642	1.31054	1.55466	1674	1.04935	1.21211	1.37487	1694	0.00565723	1.35604	1.55032	1.7446	2345	2.15e-06	1.6e-20
0	1.06192	1.30877	1.55561	1749	1.05119	1.21178	1.37236	1795	0.0357074	1.35726	1.54674	1.73621	2459	5.08e-07	5.38e-20
1	1.05853	1.30648	1.55443	1835	1.05223	1.21203	1.37183	1923	0.0437113	1.36295	1.54703	1.73112	2599	1.1e-08	1.84e-25
2	1.05544	1.30335	1.55125	1930	1.05518	1.21494	1.37471	2071	0.0580964	1.36753	1.54668	1.72584	2752	2.89e-08	2e-23
3	1.05165	1.30054	1.54943	2029	1.0563	1.21526	1.37423	2219	0.107623	1.37598	1.55331	1.73063	2922	6.67e-10	2.27e-27
4	1.05293	1.30386	1.5548	2144	1.06079	1.22288	1.38496	2375	0.188953	1.38691	1.5624	1.73789	3081	1.5e-13	1.04e-32
5	1.05754	1.31297	1.56839	2261	1.06718	1.23196	1.39674	2521	0.23353	1.39863	1.57352	1.74841	3263	2.33e-14	1.06e-31
6	1.06021	1.32262	1.58503	2391	1.07324	1.23766	1.40209	2653	0.0251016	1.42085	1.59293	1.765	3461	1.43e-15	1.78e-40
7	1.06953	1.33439	1.59925	2537	1.07945	1.24367	1.4079	2790	0.195281	1.44395	1.6136	1.78326	3648	8.23e-15	1.48e-30
8	1.0808	1.35066	1.62051	2681	1.08715	1.24964	1.41213	2914	0.0170713	1.4687	1.63771	1.80672	3843	4.61e-12	1.63e-34
9	1.09073	1.36347	1.6362	2820	1.09411	1.25722	1.42033	3039	0.00180469	1.49503	1.66559	1.83615	4036	4.36e-15	4.49e-59
10	1.10199	1.37235	1.64272	2957	1.10606	1.26903	1.432	3163	0.000182958	1.5238	1.69554	1.86728	4227	8.91e-17	2.36e-66
11	1.11361	1.38218	1.65074	3089	1.11875	1.27948	1.4402	3268	2.91328e-05	1.55509	1.72852	1.90195	4420	1.01e-17	6.61e-80
12	1.11815	1.38537	1.65259	3231	1.13443	1.29521	1.45599	3370	0.000222659	1.59139	1.7673	1.9432	4604	3.97e-23	2.24e-77
13	1.12786	1.38384	1.63982	3366	1.14965	1.31216	1.47468	3474	0.00102393	1.62812	1.80747	1.98683	4775	1.5e-35	6.95e-87
14	1.13422	1.38376	1.63329	3496	1.16761	1.33154	1.49546	3585	0.00457996	1.66476	1.84635	2.02794	4956	2.25e-38	6.73e-89
15	1.13674	1.38531	1.63387	3628	1.1895	1.35558	1.52166	3701	0.224349	1.7007	1.88361	2.06651	5122	1.32e-50	6.33e-90
16	1.14475	1.39117	1.6376	3748	1.21395	1.38191	1.54988	3816	0.905333	1.7389	1.92219	2.10548	5291	1.34e-91	6.74e-110
17	1.15204	1.40153	1.65102	3870	1.24073	1.41271	1.58468	3944	0.893875	1.77672	1.95944	2.14216	5469	1.65e-87	4.8e-118
18	1.16562	1.41009	1.65456	4019	1.26987	1.44568	1.62148	4082	0.625721	1.81563	1.9981	2.18057	5665	2.3e-73	3.13e-115
19	1.19003	1.42272	1.65542	4157	1.29552	1.4754	1.65528	4220	0.216457	1.85325	2.03639	2.21952	5858	4.16e-86	1.88e-112
20	1.21187	1.43993	1.66799	4292	1.32304	1.5066	1.69016	4359	0.0397013	1.88723	2.07344	2.25965	6036	2.84e-89	1.11e-107
21	1.23826	1.4594	1.68054	4423	1.35299	1.54142	1.72985	4485	0.000652659	1.92055	2.11044	2.30034	6181	2.11e-129	6.7e-112
22	1.27007	1.47795	1.68582	4530	1.38201	1.57813	1.77426	4595	0.000746864	1.95188	2.1461	2.34032	6316	2.51e-169	2.04e-116
23	1.30225	1.50084	1.69942	4648	1.41752	1.62107	1.82462	4719	0.00021832	1.98123	2.18159	2.38195	6458	1.38e-171	8.04e-118
24	1.33868	1.52656	1.71444	4767	1.45387	1.66441	1.87495	4848	4.02189e-05	2.01164	2.21827	2.4249	6586	1.57e-168	1.53e-106
25	1.37071	1.55617	1.74164	4846	1.48596	1.7015	1.91705	4959	1.3828e-06	2.04151	2.25596	2.47041	6709	1.01e-155	5.64e-86
26	1.39702	1.5887	1.78039	4931	1.52035	1.74033	1.96031	5068	3.63743e-07	2.07131	2.29313	2.51494	6796	1.19e-137	3.07e-78
27	1.42714	1.62517	1.8232	5033	1.55459	1.78036	2.00612	5179	5.2189e-08	2.1014	2.32931	2.55722	6901	4e-144	1.68e-80
28	1.4562	1.6603	1.8644	5110	1.58154	1.81198	2.04243	5274	2.67331e-05	2.13171	2.36641	2.6011	6987	1.39e-136	7.66e-92
29	1.48411	1.69521	1.90631	5205	1.60635	1.84082	2.07528	5353	4.29571e-05	2.16445	2.40527	2.6461	7062	1.24e-133	5.39e-92
30	1.50772	1.72405	1.94037	5282	1.62804	1.86613	2.10423	5410	3.88225e-05	2.19993	2.44687	2.6938	7116	2.93e-142	1.64e-93
31	1.53038	1.75123	1.97207	5343	1.6487	1.89061	2.13252	5442	0.00143164	2.23481	2.48724	2.73967	7170	2.28e-138	1.03e-98
32	1.54979	1.7762	2.00261	5397	1.66728	1.91385	2.16042	5468	0.00118682	2.26689	2.52488	2.78286	7188	2.84e-133	7.89e-93
33	1.56621	1.79707	2.02792	5427	1.68768	1.93848	2.18927	5480	9.8779e-05	2.29439	2.55584	2.8173	7190	1.49e-138	4.99e-94
34	1.58301	1.8159	2.04879	5423	1.70698	1.96479	2.22259	5489	4.59106e-06	2.32358	2.58977	2.85597	7161	3.37e-146	1.08e-92
35	1.59593	1.83232	2.06872	5437	1.72853	1.99064	2.25275	5503	0.00025144	2.35179	2.62118	2.89057	7144	1.48e-132	4.04e-92
36	1.60577	1.84519	2.0846	5426	1.74899	2.01204	2.2751	5543	2.68691e-06	2.37935	2.65356	2.92777	7150	2.26e-132	9.66e-83
37	1.61641	1.85924	2.10208	5429	1.76766	2.03143	2.29519	5555	1.16501e-07	2.40182	2.67755	2.95328	7088	1.87e-148	4.64e-79
38	1.62685	1.87099	2.11514	5398	1.7847	2.04808	2.31146	5532	1.2057e-05	2.42366	2.70163	2.97959	6965	5.55e-151	1.11e-96
39	1.63735	1.88223	2.1271	5360	1.80377	2.06655	2.32934	5481	1.54994e-05	2.4453	2.72488	3.00447	6825	1.28e-145	6.94e-106
40	1.64919	1.8953	2.1414	5304	1.81889	2.08353	2.34817	5448	3.20648e-05	2.46999	2.75183	3.03367	6684	6.05e-141	9.77e-103
41	1.6606	1.91217	2.16374	5232	1.83527	2.09672	2.35817	5382	2.86638e-06	2.49128	2.77681	3.06234	6546	6.22e-148	7.02e-105
42	1.67139	1.92737	2.18335	5120	1.85213	2.11411	2.37609	5311	3.89839e-06	2.51073	2.80062	3.0905	6400	2.37e-144	8.12e-100
43	1.68097	1.93957	2.19818	5021	1.86691	2.13569	2.40448	5226	1.31429e-06	2.5263	2.81882	3.11133	6231	1.87e-135	1.21e-89
44	1.6896	1.95429	2.21898	4910	1.87874	2.15493	2.43113	5153	0.000744172	2.54163	2.83793	3.13423	6122	3.97e-117	1.12e-94
45	1.69907	1.96984	2.24062	4814	1.88862	2.16946	2.45029	5075	0.000154755	2.56037	2.86531	3.17025	6051	3.48e-113	3.64e-86
46	1.71059	1.98554	2.26049	4688	1.89576	2.18341	2.47105	5006	9.80211e-08	2.57717	2.88804	3.19892	5961	2.28e-122	2.43e-71
47	1.71887	1.99851	2.27814	4572	1.90731	2.19991	2.4925	4902	8.76972e-05	2.59241	2.90777	3.22312	5872	2.14e-106	1.66e-73
48	1.72766	2.01029	2.29292	4511	1.91373	2.2131	2.51246	4806	0.000373106	2.60928	2.92941	3.24954	5741	2.09e-118	1.05e-89
49	1.73844	2.02044	2.30244	4471	1.92004	2.22588	2.53172	4696	0.000928484	2.62039	2.94563	3.27088	5615	5.4e-114	6.21e-82
50	1.75558	2.03714	2.31869	4428	1.92908	2.24149	2.55389	4561	4.44895e-05	2.63373	2.96391	3.29409	5452	1.73e-102	7.27e-69
51	1.77153	2.04875	2.32598	4391	1.94003	2.25738	2.57472	4408	0.0255351	2.65059	2.98686	3.32313	5241	3.5e-99	2.43e-75
52	1.78501	2.06115	2.33728	4352	1.95249	2.27678	2.60107	4289	0.00177301	2.6607	2.99872	3.33674	4996	6.43e-99	9.74e-64
53	1.79599	2.07129	2.34659	4321	1.96422	2.29265	2.62108	4159	0.000497952	2.6745	3.01697	3.35944	4757	4.84e-97	3.43e-54
54	1.80306	2.07969	2.35632	4256	1.96909	2.3033	2.63751	3999	0.000153107	2.68862	3.0389	3.38917	4487	3.05e-100	4.91e-54
55	1.80232	2.07936	2.3564	4102	1.97744	2.31907	2.66071	3830	0.00059665	2.69773	3.05408	3.41043	4218	3.27e-94	7.61e-54
56	1.80093	2.08226	2.36359	3970	1.98123	2.3291	2.67698	3671	0.00268537	2.7106	3.07347	3.43634	3972	1.72e-92	1.74e-55
57	1.79666	2.08224	2.36783	3607	1.97856	2.32589	2.67322	3291	0.00149559	2.71508	3.0824	3.44973	3519	1.53e-74	9.08e-44
58	1.79117	2.0811	2.37104	2980	1.97434	2.32328	2.67223	2720	0.00112417	2.71996	3.09139	3.46281	2876	2.93e-67	3.57e-36
59	1.78408	2.07807	2.37205	2368	1.96282	2.31591	2.66899	2151	0.00485283	2.72585	3.10222	3.47859	2272	1.23e-62	2.46e-34
60	1.76547	2.06763	2.36979	1786	1.94912	2.30878	2.66845	1617	0.114135	2.73751	3.11863	3.49976	1704	1.16e-25	1.28e-15

## Sheet: E
Figure 4E	S1/2B interface Myosin II f.i. vs Time
	S1/2B				-1				S1/2 vs -1	+1				S1/2B vs +1
Time after GBE onset (mins)	lower CI	Mean	upper CI	N	lower CI	Mean	upper CI	N	P-value	lower CI	Mean	upper CI	N	P-value
-20	0.76876	2.86855	4.96834	766	1.14218	3.02616	4.91014	626	0.519932	1.00692	2.98381	4.9607	837	0.829397
-19	0.817687	2.90553	4.99337	964	1.19589	3.0532	4.91051	787	0.763127	1.07316	3.04893	5.0247	1047	0.889408
-18	0.648797	2.51067	4.37254	1186	0.891961	2.53278	4.1736	972	0.931655	0.829236	2.61021	4.39118	1274	0.965714
-17	0.64634	2.49771	4.34909	1417	0.914175	2.56099	4.20781	1164	0.645993	0.878376	2.67781	4.47724	1507	0.425255
-16	1.66202	3.43265	5.20329	1575	1.86956	3.46373	5.05789	1285	0.842264	2.09075	3.83427	5.57779	1638	0.370003
-15	1.74193	3.58614	5.43035	1731	1.94181	3.60026	5.25872	1422	0.127643	2.15069	3.95854	5.76639	1774	0.450171
-14	1.87972	3.7957	5.71168	1885	2.07792	3.79814	5.51836	1552	0.836807	2.33188	4.23256	6.13324	1906	0.0228788
-13	2.04111	4.03581	6.03051	2052	2.26011	4.0539	5.84768	1676	0.693409	2.50906	4.50188	6.4947	2040	0.0332688
-12	2.22948	4.26661	6.30375	2222	2.46702	4.33376	6.20049	1801	0.624476	2.76022	4.85688	6.95354	2181	0.235282
-11	2.40276	4.51427	6.62578	2370	2.70293	4.64262	6.58232	1897	0.540522	3.05903	5.2336	7.40817	2307	0.0307702
-10	2.67681	4.8319	6.98699	2509	2.97367	4.96112	6.94857	1990	0.871847	3.3782	5.58055	7.78291	2435	0.0351004
-9	2.92091	5.13844	7.35597	2546	3.24357	5.25591	7.26824	2005	0.398395	3.70179	5.95129	8.20079	2462	2.77e-05
-8	3.17298	5.42521	7.67744	2577	3.52812	5.58313	7.63813	2013	0.864413	4.02162	6.33999	8.65835	2503	0.000164085
-7	3.39628	5.70036	8.00444	2604	3.76489	5.86655	7.96821	2016	0.927548	4.32552	6.70258	9.07965	2543	0.00932957
-6	3.63762	6.01322	8.38883	2625	4.05935	6.20164	8.34393	2023	0.576107	4.67262	7.09269	9.51276	2588	0.0092277
-5	4.00404	6.48178	8.95952	2647	4.42075	6.61287	8.80498	2042	0.79304	4.982	7.49146	10.0009	2645	0.000710461
-4	4.39282	6.96328	9.53374	2683	4.83645	7.14264	9.44884	2088	0.577378	5.32623	7.95606	10.5859	2724	0.00138221
-3	4.89977	7.65167	10.4036	2746	5.3671	7.82989	10.2927	2147	0.94884	5.92096	8.79549	11.67	2827	0.00811836
-2	5.66564	8.64191	11.6182	2854	6.12524	8.82157	11.5179	2205	0.731719	6.71492	9.82511	12.9353	2965	0.102809
-1	6.37008	9.55212	12.7342	2994	6.88096	9.86516	12.8494	2284	0.633783	7.53574	10.9157	14.2956	3119	0.0203654
0	7.31477	10.7743	14.2339	3150	7.80332	11.2074	14.6115	2398	0.952096	8.56956	12.3291	16.0886	3299	0.0010592
1	8.25184	12.032	15.8122	3329	8.69435	12.4678	16.2412	2515	0.746344	9.6926	13.8483	18.004	3502	0.0448915
2	9.32549	13.4224	17.5193	3534	9.7521	13.8782	18.0042	2651	0.0587987	10.8893	15.3671	19.8448	3728	0.000258098
3	10.4939	14.9432	19.3924	3752	10.8917	15.3066	19.7214	2784	0.221433	12.1429	16.9375	21.7321	3941	0.000204934
4	11.636	16.4859	21.3357	3963	12.094	16.7921	21.4902	2915	0.603983	13.4154	18.4897	23.5641	4146	0.000150181
5	12.8086	18.0637	23.3189	4179	13.0892	18.1092	23.1292	3067	0.931225	14.6832	20.0681	25.4529	4349	0.013144
6	14.1181	19.631	25.144	4391	14.1994	19.4687	24.7381	3209	0.682501	16.0868	21.7508	27.4147	4585	0.0272228
7	15.3089	21.0837	26.8585	4611	15.1962	20.6373	26.0785	3332	0.842862	17.2739	23.1486	29.0233	4811	0.0251198
8	16.5569	22.6797	28.8024	4808	16.2906	22.0014	27.7122	3450	0.325492	18.4101	24.6048	30.7994	5036	0.0507451
9	17.6462	24.0479	30.4495	4988	17.2258	23.1992	29.1726	3545	0.498219	19.409	25.9554	32.5017	5244	0.000340901
10	18.6221	25.2703	31.9186	5160	18.216	24.3879	30.5599	3638	0.0629923	20.4481	27.3192	34.1902	5437	0.00953401
11	19.5956	26.4841	33.3727	5338	19.0559	25.435	31.8141	3725	0.243095	21.1841	28.3258	35.4675	5601	0.0610015
12	20.4294	27.569	34.7087	5490	19.9432	26.5388	33.1345	3823	0.165996	21.8311	29.2332	36.6353	5752	0.0206652
13	21.4209	28.881	36.341	5623	20.8951	27.7424	34.5897	3909	0.400968	22.3967	30.0472	37.6977	5810	0.000279173
14	22.209	29.9059	37.6027	5739	21.7815	28.9502	36.1188	4003	0.254045	22.8842	30.7523	38.6205	5879	0.0987305
15	22.9533	30.9384	38.9235	5856	22.6562	30.1097	37.5632	4112	0.245358	23.2162	31.2941	39.372	5917	0.207411
16	23.7489	32.0041	40.2594	5979	23.3505	30.9618	38.5731	4210	0.0786247	23.5446	31.8016	40.0587	5949	0.925248
17	24.5555	33.0182	41.4809	6118	24.0426	31.9741	39.9056	4331	0.542359	23.5435	31.9161	40.2886	5992	0.594506
18	25.2036	33.9251	42.6466	6243	24.6242	32.8871	41.15	4477	0.655172	23.6134	32.0669	40.5204	6026	0.284069
19	25.7891	34.6268	43.4645	6321	25.0714	33.5414	42.0114	4609	0.0024218	23.7453	32.265	40.7848	6077	0.0883574
20	26.2497	35.2566	44.2634	6383	25.2985	33.9368	42.575	4743	0.493398	23.5959	32.1924	40.7889	6153	0.00149788
21	26.8352	36.0016	45.1679	6429	25.5062	34.4121	43.3181	4857	0.133024	23.6517	32.2998	40.9478	6181	7.17e-05
22	27.0702	36.3155	45.5607	6443	25.5055	34.5914	43.6773	4957	0.129204	23.5119	32.1787	40.8455	6203	0.0105627
23	27.4188	36.8459	46.273	6446	25.5789	34.8471	44.1154	5060	0.00175892	23.5213	32.1803	40.8394	6227	1.08e-07
24	27.6819	37.2883	46.8947	6395	25.3689	34.7115	44.054	5116	0.0524304	23.6416	32.311	40.9804	6268	5.24e-06
25	27.9873	37.633	47.2787	6321	25.1389	34.5656	43.9923	5189	0.0863657	23.6789	32.4699	41.2609	6303	5.63e-05
26	28.3754	38.0507	47.726	6285	24.8995	34.5359	44.1723	5209	2.17e-05	23.818	32.684	41.55	6288	4.18e-08
27	28.5926	38.2732	47.9538	6232	24.8438	34.6698	44.4959	5255	5.48e-06	24.1259	33.0297	41.9334	6270	5.51e-07
28	28.8946	38.6727	48.4508	6184	24.639	34.5093	44.3797	5287	1.22e-06	24.1999	33.1399	42.0798	6260	3.19e-06
29	29.3883	39.2497	49.1112	6141	24.4761	34.3958	44.3154	5297	8.94e-06	24.403	33.3721	42.3413	6222	6.39e-05
30	29.6697	39.4823	49.2948	6065	24.3745	34.3661	44.3576	5332	0.000242641	24.6336	33.666	42.6984	6149	1.48e-05
31	30.0699	39.8832	49.6966	5987	24.2863	34.2978	44.3093	5349	6.76e-10	24.8031	33.9233	43.0435	6066	3.92e-12
32	30.4064	40.24	50.0736	5915	24.4761	34.5383	44.6004	5331	1.1e-07	25.1581	34.3125	43.4669	6011	6.44e-10
33	30.7919	40.6968	50.6017	5826	24.6299	34.6421	44.6543	5328	1.27e-08	25.2548	34.4026	43.5503	5939	9.11e-08
34	31.4804	41.5077	51.5351	5750	24.7806	34.7685	44.7565	5286	3.83e-14	25.4165	34.5143	43.612	5865	2.12e-09
35	31.8824	41.9225	51.9626	5683	25.0268	34.903	44.7791	5258	2.14e-08	25.5333	34.6558	43.7782	5795	5.3e-07
36	32.3407	42.3727	52.4046	5610	25.2224	35.151	45.0797	5248	2.07e-11	25.7604	34.9071	44.0538	5767	1.47e-10
37	32.6618	42.774	52.8862	5574	25.3816	35.328	45.2744	5228	1.07e-14	25.9293	35.0813	44.2333	5765	2.81e-19
38	33.0429	43.1834	53.3238	5515	25.606	35.6488	45.6916	5192	3.5e-15	26.2256	35.3957	44.5657	5701	1.26e-15
39	33.3368	43.5485	53.7603	5428	25.5074	35.5748	45.6422	5113	8.45e-13	26.1918	35.2851	44.3784	5610	1.56e-15
40	33.7019	44.0846	54.4673	5338	25.8485	35.8551	45.8617	5056	1.81e-13	26.3685	35.5503	44.732	5544	4.14e-11
41	33.488	43.938	54.388	5249	25.7663	35.8059	45.8455	5006	6.14e-14	26.3753	35.6673	44.9594	5503	2.51e-10
42	33.5613	44.0794	54.5975	5134	25.7627	35.9192	46.0758	4928	4.22e-14	26.5059	35.8874	45.2689	5458	1.21e-13
43	33.4291	43.997	54.5648	5033	25.5876	35.6775	45.7673	4840	3.04e-16	26.4019	35.8536	45.3053	5406	2.01e-13
44	33.4996	44.0807	54.6617	4917	25.5385	35.58	45.6215	4721	1.64e-10	26.2534	35.6465	45.0396	5315	1.15e-10
45	33.1825	43.7343	54.2861	4843	25.3382	35.3367	45.3351	4607	1.02e-12	25.8399	35.1843	44.5288	5278	4.84e-12
46	32.9374	43.5341	54.1308	4805	25.4906	35.5495	45.6084	4513	1.25e-11	25.6821	35.066	44.4499	5242	4.1e-11
47	32.4395	42.9065	53.3735	4736	25.3536	35.5741	45.7946	4423	2.12e-12	25.4124	34.6398	43.8671	5164	5.28e-14
48	32.5148	42.9117	53.3085	4693	25.432	35.7131	45.9942	4326	2.24e-11	25.5254	34.7288	43.9322	5071	1.42e-12
49	32.1838	42.5276	52.8714	4627	25.2772	35.5828	45.8884	4242	3.1e-06	25.3525	34.4458	43.539	4947	5.19e-12
50	31.8032	42.0378	52.2724	4574	25.157	35.4624	45.7678	4172	0.00137087	25.31	34.2897	43.2694	4795	9.13e-10
51	31.443	41.6243	51.8057	4522	24.9573	35.2299	45.5026	4115	2.13e-06	25.3984	34.4938	43.5893	4667	5.82e-08
52	31.14	41.3195	51.499	4467	24.9507	35.267	45.5832	4088	1.12e-06	25.486	34.669	43.8521	4524	1.65e-09
53	30.9741	41.1449	51.3157	4390	24.6634	34.8121	44.9607	4060	3.89e-06	25.5683	34.8045	44.0407	4382	2.38e-05
54	30.7817	41.005	51.2282	4330	24.1865	34.1059	44.0253	3989	5.75e-10	25.6838	35.0412	44.3986	4230	0.000480915
55	30.4402	40.6893	50.9384	4196	23.95	33.5595	43.169	3896	1.13e-05	25.5729	35.0374	44.5018	4051	0.000282205
56	30.4091	40.6375	50.8658	4104	23.9347	33.2741	42.6135	3812	3.72e-09	25.6806	35.3259	44.9713	3909	1.25e-05
57	30.4978	40.8546	51.2115	3740	23.9108	33.1772	42.4436	3477	5.58e-11	25.9382	35.6745	45.4108	3539	9.53e-05
58	30.3755	40.7802	51.185	3119	23.9382	33.1642	42.3902	2901	1.58e-12	25.7873	35.5372	45.2872	2935	0.000613978
59	30.5394	41.0325	51.5257	2501	23.9075	32.8588	41.81	2331	1.24e-11	25.8713	35.6265	45.3816	2340	0.00106317
60	30.6496	41.0501	51.4506	1902	23.8646	32.6049	41.3452	1769	2.36e-05	26.1768	35.9507	45.7247	1762	0.0254598

## Sheet: F
Figure 4F	S2/3B interface Myosin II f.i. vs Time
	S2/3B				-1				S2/3 vs -1	+1				S2/3B vs +1
Time after GBE onset (mins)	lower CI	Mean	upper CI	N	lower CI	Mean	upper CI	N	P-value	lower CI	Mean	upper CI	N	P-value
-20	0.983514	2.78424	4.58496	863	0.790707	2.64066	4.49061	838	0.36171	1.05962	3.38731	5.71501	674	0.0148797
-19	1.04416	2.84669	4.64923	1088	0.854545	2.69437	4.5342	1052	0.0712463	1.11779	3.4341	5.75041	845	0.00237449
-18	0.879257	2.5082	4.13715	1338	0.712109	2.36706	4.022	1284	0.494972	0.890706	2.94966	5.00862	1039	0.00321346
-17	0.918981	2.57384	4.2287	1584	0.690507	2.35922	4.02793	1526	0.486602	0.93616	3.00866	5.08116	1233	0.000186519
-16	2.02369	3.66253	5.30137	1731	1.72673	3.34917	4.97162	1656	0.226007	2.12048	4.05021	5.97993	1352	0.0108484
-15	2.05761	3.78876	5.51992	1869	1.76104	3.46223	5.16342	1800	0.31324	2.25385	4.22232	6.1908	1486	0.0356353
-14	2.18917	4.02094	5.8527	2010	1.87447	3.67123	5.46799	1941	0.0475471	2.49673	4.53189	6.56705	1607	0.0727973
-13	2.33075	4.24875	6.16674	2164	2.00515	3.89199	5.77884	2086	0.0777237	2.76157	4.85605	6.95053	1740	0.136015
-12	2.52504	4.52429	6.52354	2317	2.18248	4.13161	6.08074	2236	0.0300129	3.06983	5.25024	7.43065	1875	0.0140415
-11	2.76011	4.83511	6.91012	2448	2.34584	4.3791	6.41237	2373	0.0727402	3.37257	5.60534	7.83812	1991	0.00777005
-10	3.04147	5.15683	7.27218	2593	2.59284	4.67155	6.75027	2510	0.168301	3.77375	6.0177	8.26165	2095	0.000250401
-9	3.31808	5.47975	7.64142	2633	2.79888	4.93957	7.08025	2552	0.0461303	4.17037	6.45823	8.7461	2117	1.44e-05
-8	3.56886	5.79949	8.03013	2689	3.03158	5.21458	7.39759	2587	0.0326073	4.47356	6.80832	9.14308	2122	0.00307222
-7	3.78836	6.07657	8.36478	2741	3.23008	5.4537	7.67733	2624	0.0235997	4.77472	7.1739	9.57308	2130	0.00170511
-6	4.07476	6.42282	8.77087	2783	3.4279	5.72515	8.0224	2657	0.0412487	5.15064	7.58893	10.0272	2129	0.000410407
-5	4.39556	6.87084	9.34612	2836	3.74788	6.1355	8.52311	2689	0.00615374	5.57902	8.09452	10.61	2141	0.0483951
-4	4.72744	7.31859	9.90974	2914	4.07861	6.54487	9.01113	2746	0.0299541	6.06631	8.69871	11.3311	2172	0.00131989
-3	5.21714	8.10176	10.9864	3014	4.5133	7.1673	9.8213	2811	0.0326759	6.64799	9.47218	12.2964	2264	0.000663261
-2	5.95946	9.04525	12.131	3138	5.22622	8.10092	10.9756	2916	0.094137	7.47318	10.5569	13.6406	2375	0.00230001
-1	6.72706	10.0475	13.368	3289	5.87685	8.97236	12.0679	3048	0.0336652	8.35599	11.7616	15.1672	2495	0.000466795
0	7.70135	11.3607	15.0201	3470	6.74076	10.1716	13.6024	3199	0.00302471	9.36795	13.078	16.7881	2659	0.164777
1	8.70446	12.6997	16.695	3682	7.59935	11.3485	15.0976	3383	0.102092	10.3424	14.3115	18.2806	2827	0.00406929
2	9.86261	14.1711	18.4796	3923	8.60239	12.643	16.6837	3593	0.0028954	11.5483	15.9027	20.2571	3020	0.00157568
3	11.0998	15.7884	20.477	4144	9.75785	14.1406	18.5233	3793	0.0146993	12.737	17.4369	22.1369	3211	0.0543368
4	12.413	17.4004	22.3878	4375	10.8939	15.6337	20.3735	3998	0.00352811	14.0172	19.028	24.0387	3376	0.145051
5	13.6658	19.0401	24.4144	4610	12.0072	17.0755	22.1439	4208	0.00382527	15.2007	20.6894	26.1781	3548	0.000331021
6	14.9542	20.6427	26.3313	4820	13.2325	18.5223	23.812	4413	0.00378516	16.4309	22.2272	28.0235	3731	0.0768826
7	16.1441	22.0741	28.0041	5022	14.3123	19.8424	25.3724	4624	0.00179596	17.6672	23.8202	29.9732	3896	0.180915
8	17.4665	23.771	30.0755	5208	15.4203	21.2453	27.0702	4793	0.000271976	18.9469	25.4056	31.8643	4071	0.0424575
9	18.5234	25.1939	31.8645	5375	16.4322	22.5683	28.7043	4959	0.000236619	19.9377	26.6877	33.4378	4222	0.0718197
10	19.4677	26.4188	33.3699	5523	17.4065	23.8073	30.2082	5115	0.00125929	21.0989	28.2399	35.3809	4365	0.0144984
11	20.2516	27.5741	34.8966	5647	18.3083	25.0184	31.7284	5273	1.83e-05	22.0279	29.4161	36.8044	4508	0.376837
12	20.8697	28.509	36.1482	5743	19.0958	26.0863	33.0768	5405	0.00176198	22.8565	30.3824	37.9082	4624	0.0492594
13	21.5077	29.3864	37.2651	5814	20.0355	27.3307	34.626	5530	0.0100477	23.7209	31.4387	39.1566	4737	0.000221121
14	22.0267	30.123	38.2193	5890	20.7371	28.2923	35.8474	5625	0.00618208	24.324	32.1672	40.0105	4838	0.138637
15	22.3708	30.6946	39.0184	5925	21.4412	29.2799	37.1185	5733	0.0111347	24.8207	32.8717	40.9228	4919	0.0475574
16	22.8649	31.3754	39.886	5951	22.123	30.1679	38.2128	5828	0.542997	25.2548	33.5044	41.7539	5008	0.0165312
17	23.3684	32.074	40.7795	6001	22.5687	30.8271	39.0854	5936	0.189871	25.3955	33.7415	42.0874	5103	0.0764325
18	23.7624	32.5796	41.3968	6029	22.9116	31.4146	39.9175	6017	0.327378	25.5669	34.0872	42.6076	5199	0.246881
19	24.3294	33.1736	42.0179	6085	23.2665	31.8838	40.5011	6084	0.118218	25.6674	34.2761	42.8847	5319	0.463883
20	24.6341	33.556	42.4779	6160	23.2457	32.0423	40.8389	6127	0.00432656	25.6603	34.3311	43.0018	5438	0.667887
21	25.2356	34.2693	43.3031	6189	23.4595	32.4084	41.3572	6166	0.0894674	25.8895	34.7178	43.5462	5542	0.730625
22	25.5098	34.5467	43.5836	6219	23.3169	32.316	41.315	6183	0.00153816	26.0447	34.9511	43.8574	5634	0.316992
23	25.9177	35.0153	44.1128	6260	23.339	32.4791	41.6192	6202	0.0475257	26.1236	35.0663	44.009	5703	0.866588
24	26.1253	35.2366	44.3478	6305	23.306	32.4742	41.6424	6195	0.00230966	26.1814	35.1887	44.196	5765	0.85449
25	26.4537	35.6889	44.9242	6347	23.5179	32.6304	41.743	6208	9.71e-05	26.2941	35.3699	44.4457	5816	0.236378
26	26.8669	36.2516	45.6362	6340	23.7202	32.8603	42.0004	6212	0.000129755	26.5851	35.8738	45.1625	5832	0.270982
27	27.5086	36.9085	46.3084	6311	23.9503	33.015	42.0798	6191	9.01e-06	26.7571	36.1338	45.5104	5818	0.655164
28	27.9262	37.3742	46.8223	6270	24.1005	33.1607	42.2209	6173	1.71e-05	26.9161	36.3239	45.7318	5818	0.0893672
29	28.551	38.1681	47.7852	6229	24.4101	33.3893	42.3686	6168	1.96e-07	27.1096	36.5459	45.9822	5821	0.351464
30	29.2163	38.9457	48.6751	6157	24.5742	33.432	42.2897	6118	9.08e-09	27.3167	36.9188	46.5209	5820	0.0610842
31	30.0344	39.8777	49.721	6055	24.8898	33.6985	42.5072	6066	6.67e-08	27.709	37.3594	47.0098	5815	0.034558
32	30.7415	40.5641	50.3868	5956	24.9294	33.7237	42.5181	6002	3.65e-15	27.9147	37.5971	47.2796	5775	0.00190687
33	31.3576	41.202	51.0464	5889	24.9602	33.7494	42.5386	5942	5.34e-18	27.8727	37.5519	47.2311	5735	0.000149406
34	32.0705	42.0436	52.0166	5811	25.2146	34.0335	42.8523	5903	1.04e-16	28.0184	37.7848	47.5513	5687	0.000299758
35	32.6234	42.7161	52.8087	5739	25.376	34.1345	42.893	5873	2.39e-16	27.9739	37.8756	47.7773	5650	3.55e-06
36	33.274	43.3626	53.4512	5683	25.7084	34.5631	43.4177	5818	4.21e-19	28.0528	38.0196	47.9863	5608	9.88e-08
37	33.6323	43.7769	53.9214	5629	25.9733	34.8657	43.7582	5812	2.13e-20	28.0177	38.0195	48.0213	5544	1.13e-08
38	34.0427	44.2645	54.4863	5546	26.2729	35.2488	44.2247	5785	1.78e-20	27.8149	37.8874	47.9598	5441	5.29e-08
39	34.3159	44.6426	54.9692	5464	26.371	35.4788	44.5866	5719	1.08e-18	27.665	37.853	48.041	5341	4.4e-09
40	34.7126	45.1523	55.592	5362	26.6732	35.8627	45.0522	5653	1.04e-20	27.794	37.936	48.0781	5264	3.02e-09
41	34.8008	45.361	55.9212	5286	26.6534	35.9091	45.1649	5591	2.05e-18	27.6523	37.867	48.0816	5192	1.02e-12
42	34.792	45.4674	56.1429	5236	26.8712	36.227	45.5829	5512	6.17e-15	27.4595	37.6692	47.879	5060	1.1e-09
43	34.5675	45.3815	56.1956	5166	26.7459	36.1365	45.5271	5437	1.28e-16	27.0537	37.2839	47.5141	4922	6.97e-13
44	34.4918	45.3116	56.1315	5107	26.7594	36.1728	45.5863	5323	6.33e-20	26.7828	36.8953	47.0079	4816	8.33e-13
45	34.0564	44.8518	55.6471	5072	26.5501	36.0307	45.5112	5236	7.91e-12	26.2521	36.4208	46.5895	4725	7.91e-11
46	33.9319	44.782	55.632	5017	26.5837	36.0098	45.4358	5185	1.05e-12	26.0911	36.2173	46.3434	4659	6.49e-12
47	33.5643	44.368	55.1717	4943	26.3449	35.7302	45.1156	5087	4.9e-15	25.7536	35.9905	46.2274	4570	5.16e-15
48	33.3447	44.1409	54.9372	4848	26.4027	35.7672	45.1317	5002	7.76e-09	25.6721	35.9626	46.2532	4465	1.59e-10
49	33.1611	43.8598	54.5585	4731	26.0285	35.2786	44.5287	4895	6.3e-14	25.4941	35.8278	46.1616	4407	1.22e-11
50	32.8316	43.4979	54.1641	4605	25.7487	34.9046	44.0604	4781	2.67e-13	25.5165	35.8903	46.264	4348	2.72e-09
51	32.5128	43.2229	53.933	4476	25.5153	34.7137	43.9121	4677	4.88e-13	25.63	36.1497	46.6695	4270	5.51e-08
52	32.5568	43.3444	54.1319	4347	25.4356	34.6596	43.8836	4547	1.86e-15	25.8584	36.4579	47.0574	4177	3.52e-08
53	32.3191	43.2222	54.1253	4219	25.3899	34.6171	43.8443	4409	4.26e-13	25.7691	36.4936	47.2182	4047	1.83e-05
54	32.2539	43.3352	54.4165	4076	25.3729	34.5966	43.8203	4279	4.46e-10	25.6849	36.4376	47.1904	3872	1.03e-05
55	32.1392	43.3191	54.4989	3923	25.3262	34.5791	43.832	4108	1.04e-08	25.6976	36.3952	47.0928	3695	1.01e-06
56	32.089	43.4668	54.8446	3785	25.4114	34.7348	44.0582	3984	3e-10	26.0943	36.8278	47.5613	3487	1.12e-06
57	32.3269	43.788	55.2491	3421	25.815	35.2303	44.6456	3618	1.88e-11	26.2461	37.0553	47.8645	3093	2.03e-07
58	32.3129	43.8954	55.4778	2829	25.9187	35.3411	44.7635	3006	8.55e-11	26.1031	36.9432	47.7832	2522	5.4e-08
59	32.1651	43.9098	55.6544	2255	25.9201	35.2199	44.5196	2419	2.19e-12	26.3384	37.0918	47.8452	1982	0.000743049
60	32.4263	44.1252	55.8241	1703	25.9635	35.1819	44.4003	1837	4.26e-05	27.0063	37.6004	48.1946	1473	0.00398105

## Sheet: G
Figure 4G	Interface alignment analysis over time for S1/2B, +1 and -1 interfaces
Data Points					LOWESS
Time after GBE onset (mins)	S1/2B	+1	-1		Time after GBE onset (mins)	S1/2B	+1	-1
-20	0.453488	0.448598	0.354545		-20	0.440911	0.449372	0.360927
-19.5	0.44186	0.432692	0.378378		-19.8756	0.440221	0.449519	0.363863
-19	0.444445	0.485714	0.342342		-19.7512	0.43953	0.449666	0.366799
-18.5	0.431579	0.462264	0.417391		-19.6268	0.43884	0.449813	0.369735
-18	0.459184	0.451923	0.391304		-19.5023	0.438149	0.44996	0.372671
-17.5	0.416667	0.436893	0.396396		-19.3779	0.438273	0.451015	0.374627
-17	0.438775	0.457944	0.424779		-19.2535	0.438413	0.452087	0.376565
-16.5	0.424242	0.458716	0.422414		-19.1291	0.438552	0.45316	0.378504
-16	0.453608	0.46729	0.452174		-19.0047	0.438692	0.454232	0.380442
-15.5	0.44898	0.449541	0.431034		-18.8803	0.438794	0.453549	0.383697
-15	0.476191	0.451327	0.460938		-18.7558	0.438895	0.452798	0.387004
-14.5	0.448598	0.465517	0.438462		-18.6314	0.438997	0.452047	0.39031
-14	0.468469	0.508475	0.419847		-18.507	0.439098	0.451296	0.393617
-13.5	0.427273	0.504202	0.446154		-18.3826	0.439554	0.451589	0.394687
-13	0.420382	0.491329	0.449438		-18.2582	0.440032	0.451945	0.395624
-12.5	0.458599	0.479769	0.438889		-18.1337	0.440509	0.4523	0.396562
-12	0.427673	0.511494	0.453552		-18.0093	0.440987	0.452655	0.397499
-11.5	0.46875	0.488372	0.491803		-17.8849	0.440834	0.453415	0.399142
-11	0.478261	0.485714	0.494624		-17.7605	0.440631	0.454207	0.400843
-10.5	0.47205	0.497143	0.465241		-17.6361	0.440427	0.455	0.402544
-10	0.467066	0.468927	0.441489		-17.5117	0.440224	0.455792	0.404245
-9.5	0.448485	0.491329	0.455027		-17.3873	0.440844	0.456924	0.40588
-9	0.457831	0.460227	0.43617		-17.2628	0.44155	0.458091	0.407509
-8.5	0.494118	0.478022	0.458333		-17.1384	0.442255	0.459258	0.409137
-8	0.508876	0.464088	0.466321		-17.014	0.442961	0.460425	0.410766
-7.5	0.518518	0.458101	0.436464		-16.8896	0.443312	0.461265	0.411978
-7	0.47093	0.491713	0.473684		-16.7652	0.443617	0.462063	0.413137
-6.5	0.529412	0.481081	0.476191		-16.6408	0.443923	0.462861	0.414296
-6	0.508876	0.508287	0.479167		-16.5163	0.444229	0.46366	0.415455
-5.5	0.49711	0.510526	0.521053		-16.3919	0.444764	0.464442	0.416674
-5	0.488095	0.486911	0.518135		-16.2675	0.445333	0.465222	0.417901
-4.5	0.525714	0.481675	0.525773		-16.1431	0.445903	0.466002	0.419128
-4	0.51462	0.531915	0.557292		-16.0187	0.446472	0.466782	0.420355
-3.5	0.534884	0.565445	0.529412		-15.8942	0.446701	0.467424	0.421201
-3	0.526627	0.553846	0.552083		-15.7698	0.446869	0.468041	0.42198
-2.5	0.54023	0.540816	0.572165		-15.6454	0.447037	0.468659	0.422758
-2	0.548571	0.502416	0.54359		-15.521	0.447205	0.469277	0.423536
-1.5	0.585799	0.541463	0.577889		-15.3966	0.447482	0.470061	0.424546
-1	0.576271	0.511628	0.569307		-15.2722	0.447781	0.470878	0.425602
-0.5	0.560847	0.563636	0.552239		-15.1478	0.448079	0.471696	0.426658
0	0.583784	0.569507	0.557692		-15.0233	0.448378	0.472513	0.427714
0.5	0.595122	0.586066	0.600897		-14.8989	0.448438	0.473263	0.428402
1	0.587156	0.588	0.629956		-14.7745	0.448442	0.473997	0.429005
1.5	0.603604	0.584314	0.62931		-14.6501	0.448447	0.474731	0.429609
2	0.622881	0.598485	0.657025		-14.5257	0.448452	0.475465	0.430212
2.5	0.625532	0.621723	0.635628		-14.4012	0.448815	0.476009	0.431017
3	0.653061	0.651246	0.653992		-14.2768	0.449271	0.476504	0.431875
3.5	0.632653	0.631206	0.657692		-14.1524	0.449728	0.476999	0.432733
4	0.642586	0.612245	0.647287		-14.028	0.450184	0.477494	0.433591
4.5	0.638783	0.633898	0.692884		-13.9036	0.450503	0.477517	0.434617
5	0.652174	0.620579	0.687719		-13.7792	0.450782	0.477403	0.435691
5.5	0.641577	0.632399	0.678322		-13.6547	0.45106	0.477288	0.436766
6	0.680702	0.639498	0.700337		-13.5303	0.451339	0.477174	0.43784
6.5	0.657343	0.640625	0.682432		-13.4059	0.452095	0.477078	0.438643
7	0.660959	0.623494	0.739726		-13.2815	0.453006	0.476989	0.439357
7.5	0.643791	0.618768	0.725552		-13.1571	0.453916	0.4769	0.440072
8	0.672956	0.609195	0.7125		-13.0327	0.454826	0.476811	0.440786
8.5	0.655488	0.617486	0.721557		-12.9082	0.455878	0.476839	0.441469
9	0.666667	0.632979	0.688822		-12.7838	0.45698	0.47691	0.442141
9.5	0.671554	0.617347	0.697674		-12.6594	0.458082	0.47698	0.442813
10	0.655172	0.624685	0.705882		-12.535	0.459184	0.477051	0.443485
10.5	0.654286	0.615979	0.685083		-12.4106	0.459989	0.477234	0.444276
11	0.644444	0.639225	0.701408		-12.2862	0.460676	0.477461	0.445115
11.5	0.666667	0.607565	0.674286		-12.1617	0.461364	0.477688	0.445954
12	0.663014	0.586047	0.662921		-12.0373	0.462051	0.477915	0.446792
12.5	0.656676	0.592255	0.66573		-11.9129	0.463078	0.477853	0.44754
13	0.656837	0.626147	0.666667		-11.7885	0.46425	0.477666	0.448249
13.5	0.670185	0.587699	0.666667		-11.6641	0.465422	0.47748	0.448958
14	0.658915	0.612009	0.659517		-11.5397	0.466594	0.477293	0.449666
14.5	0.641604	0.628235	0.662338		-11.4152	0.467451	0.477321	0.450089
15	0.6325	0.597285	0.656566		-11.2908	0.468162	0.477449	0.450377
15.5	0.633005	0.607306	0.649123		-11.1664	0.468873	0.477577	0.450665
16	0.623188	0.60373	0.62069		-11.042	0.469583	0.477706	0.450953
16.5	0.640476	0.62037	0.651961		-10.9176	0.470253	0.477888	0.451275
17	0.631579	0.594037	0.621359		-10.7932	0.470901	0.478099	0.451614
17.5	0.640187	0.59375	0.636145		-10.6687	0.47155	0.47831	0.451954
18	0.647597	0.605856	0.612591		-10.5443	0.472198	0.478521	0.452294
18.5	0.613426	0.583524	0.619855		-10.4199	0.47294	0.478681	0.452952
19	0.630485	0.571749	0.640777		-10.2955	0.473735	0.478815	0.453789
19.5	0.640187	0.604966	0.606357		-10.1711	0.474529	0.478948	0.454625
20	0.605923	0.577012	0.617225		-10.0467	0.475323	0.479081	0.455461
20.5	0.606335	0.565701	0.602804		-9.92224	0.476203	0.479504	0.45658
21	0.627753	0.560365	0.597753		-9.79782	0.477135	0.4801	0.457868
21.5	0.617904	0.565315	0.620309		-9.67341	0.478067	0.480696	0.459157
22	0.594235	0.556768	0.606667		-9.54899	0.478999	0.481293	0.460446
22.5	0.627753	0.548035	0.596491		-9.42457	0.480134	0.481768	0.461717
23	0.594771	0.562914	0.596529		-9.30016	0.481399	0.482166	0.462977
23.5	0.625551	0.553846	0.578603		-9.17574	0.482665	0.482564	0.464237
24	0.59867	0.523077	0.575824		-9.05132	0.483931	0.482962	0.465497
24.5	0.601751	0.578231	0.567329		-8.9269	0.485191	0.483652	0.466991
25	0.596491	0.547672	0.586908		-8.80249	0.486447	0.484549	0.46865
25.5	0.599548	0.553488	0.542793		-8.67807	0.487704	0.485446	0.470309
26	0.621444	0.554084	0.580357		-8.55365	0.48896	0.486343	0.471967
26.5	0.587302	0.515419	0.558352		-8.42924	0.490011	0.487156	0.473546
27	0.597753	0.527233	0.526559		-8.30482	0.490906	0.487907	0.475063
27.5	0.589404	0.548596	0.558036		-8.1804	0.491801	0.488658	0.476581
28	0.612975	0.534783	0.547414		-8.05599	0.492696	0.489409	0.478098
28.5	0.60771	0.539648	0.528261		-7.93157	0.493542	0.490308	0.479628
29	0.591422	0.531729	0.534521		-7.80715	0.494348	0.491328	0.481169
29.5	0.585973	0.532009	0.533181		-7.68274	0.495154	0.492348	0.482709
30	0.600452	0.514286	0.494624		-7.55832	0.49596	0.493367	0.48425
30.5	0.60274	0.508889	0.496718		-7.4339	0.496752	0.494484	0.486063
31	0.592677	0.509009	0.502242		-7.30949	0.497532	0.495685	0.488118
31.5	0.596774	0.529545	0.48337		-7.18507	0.498312	0.496887	0.490173
32	0.605701	0.545024	0.49095		-7.06065	0.499092	0.498088	0.492228
32.5	0.620283	0.497664	0.502326		-6.93624	0.500251	0.499121	0.494097
33	0.60095	0.518957	0.489842		-6.81182	0.501771	0.499993	0.495789
33.5	0.604878	0.494005	0.487528		-6.6874	0.503291	0.500865	0.49748
34	0.582126	0.513002	0.504545		-6.56299	0.504811	0.501737	0.499172
34.5	0.602978	0.524038	0.483491		-6.43857	0.506011	0.502736	0.50091
35	0.603535	0.492857	0.489511		-6.31415	0.506881	0.503865	0.502695
35.5	0.583333	0.504717	0.496487		-6.18973	0.507751	0.504995	0.504481
36	0.601504	0.496296	0.489157		-6.06532	0.508621	0.506124	0.506266
36.5	0.608479	0.508599	0.497642		-5.9409	0.509668	0.507143	0.508102
37	0.59601	0.506112	0.495283		-5.81649	0.510912	0.508041	0.509995
37.5	0.61596	0.5075	0.491687		-5.69207	0.512155	0.508938	0.511888
38	0.597052	0.486553	0.475525		-5.56765	0.513399	0.509835	0.513781
38.5	0.601467	0.515815	0.476303		-5.44323	0.514768	0.510776	0.515494
39	0.621287	0.489104	0.498812		-5.31882	0.516288	0.511767	0.516994
39.5	0.602015	0.483951	0.491566		-5.1944	0.517807	0.512759	0.518494
40	0.58209	0.50358	0.474299		-5.06998	0.519327	0.513751	0.519994
40.5	0.587224	0.507282	0.472554		-4.94557	0.520959	0.514941	0.521579
41	0.595855	0.482759	0.497487		-4.82115	0.522735	0.516386	0.523274
41.5	0.616798	0.508997	0.477723		-4.69673	0.524511	0.517832	0.524968
42	0.595238	0.514212	0.492347		-4.57232	0.526287	0.519277	0.526663
42.5	0.585635	0.502604	0.470284		-4.4479	0.527917	0.520824	0.528385
43	0.631148	0.496084	0.479058		-4.32348	0.529342	0.522513	0.530143
43.5	0.607955	0.495979	0.448718		-4.19907	0.530768	0.524201	0.531902
44	0.608451	0.45953	0.477041		-4.07465	0.532194	0.525889	0.533661
44.5	0.628242	0.502703	0.479275		-3.95023	0.533733	0.527383	0.535315
45	0.605263	0.496	0.464		-3.82582	0.535444	0.528585	0.536813
45.5	0.588068	0.5	0.486486		-3.7014	0.537155	0.529786	0.538311
46	0.58997	0.479893	0.482385		-3.57698	0.538865	0.530988	0.539808
46.5	0.588757	0.484932	0.464286		-3.45257	0.540528	0.532076	0.5415
47	0.598802	0.497253	0.472779		-3.32815	0.542112	0.532979	0.543508
47.5	0.593272	0.501425	0.467049		-3.20373	0.543696	0.533883	0.545516
48	0.588757	0.508197	0.479167		-3.07931	0.54528	0.534786	0.547523
48.5	0.565868	0.490305	0.501548		-2.9549	0.546951	0.535788	0.549477
49	0.594118	0.484849	0.501529		-2.83048	0.548775	0.536966	0.551335
49.5	0.601209	0.505682	0.515625		-2.70607	0.5506	0.538144	0.553194
50	0.595611	0.494083	0.517134		-2.58165	0.552424	0.539322	0.555052
50.5	0.588957	0.495522	0.532508		-2.45723	0.55423	0.540597	0.556866
51	0.612805	0.519288	0.509146		-2.33282	0.556003	0.54206	0.558596
51.5	0.588415	0.50303	0.511182		-2.2084	0.557775	0.543523	0.560325
52	0.592834	0.49375	0.498382		-2.08398	0.559548	0.544986	0.562054
52.5	0.571895	0.514286	0.52459		-1.95956	0.561322	0.54665	0.563948
53	0.553333	0.496644	0.49359		-1.83515	0.563099	0.548732	0.566185
53.5	0.581395	0.514754	0.485804		-1.71073	0.564877	0.550814	0.568421
54	0.571429	0.486755	0.503185		-1.58631	0.566654	0.552897	0.570658
54.5	0.590759	0.486842	0.488959		-1.4619	0.568312	0.554855	0.572797
55	0.58194	0.496599	0.501598		-1.33748	0.5697	0.556531	0.574713
55.5	0.604167	0.5	0.503311		-1.21306	0.571088	0.558207	0.576629
56	0.569893	0.507042	0.506622		-1.08865	0.572476	0.559883	0.578546
56.5	0.58209	0.485611	0.538721		-0.96423	0.573924	0.561698	0.580527
57	0.561338	0.507463	0.533784		-0.839813	0.57552	0.563858	0.582671
57.5	0.587549	0.515695	0.534137		-0.715396	0.577115	0.566017	0.584815
58	0.565574	0.50463	0.508		-0.590979	0.578711	0.568176	0.586959
58.5	0.595142	0.515837	0.493776		-0.466563	0.580383	0.570173	0.589198
59	0.602459	0.525822	0.518518		-0.342146	0.582262	0.571725	0.591695
59.5	0.625514	0.513393	0.52766		-0.217729	0.584142	0.573276	0.594192
60	0.614754	0.521127	0.519149		-0.0933123	0.586021	0.574828	0.59669
					0.0311045	0.587842	0.57637	0.599205
					0.155521	0.589487	0.577882	0.601774
					0.279938	0.591132	0.579395	0.604343
					0.404355	0.592777	0.580907	0.606911
					0.528772	0.594398	0.582371	0.609379
					0.653188	0.595939	0.583677	0.611513
					0.777605	0.59748	0.584982	0.613646
					0.902022	0.599021	0.586288	0.615779
					1.02644	0.600592	0.587586	0.617852
					1.15086	0.602271	0.588854	0.619706
					1.27527	0.60395	0.590122	0.62156
					1.39969	0.60563	0.591391	0.623413
					1.52411	0.607272	0.592664	0.625283
					1.64852	0.608761	0.593961	0.627219
					1.77294	0.610251	0.595257	0.629156
					1.89736	0.61174	0.596553	0.631092
					2.02177	0.613187	0.597812	0.632972
					2.14619	0.614433	0.598893	0.634589
					2.27061	0.61568	0.599974	0.636205
					2.39502	0.616927	0.601056	0.637822
					2.51944	0.618167	0.602083	0.639485
					2.64386	0.619376	0.602815	0.641399
					2.76827	0.620584	0.603547	0.643313
					2.89269	0.621792	0.604279	0.645228
					3.01711	0.622948	0.604949	0.647109
					3.14153	0.623773	0.605228	0.648778
					3.26594	0.624597	0.605508	0.650448
					3.39036	0.625422	0.605788	0.652118
					3.51478	0.626274	0.606091	0.653778
					3.63919	0.627329	0.606564	0.655368
					3.76361	0.628384	0.607038	0.656958
					3.88802	0.629439	0.607511	0.658548
					4.01244	0.630478	0.608003	0.660146
					4.13686	0.631364	0.608663	0.661821
					4.26128	0.632251	0.609323	0.663497
					4.38569	0.633138	0.609982	0.665172
					4.51011	0.634025	0.610613	0.666792
					4.63453	0.634921	0.610915	0.667786
					4.75894	0.635816	0.611216	0.668781
					4.88336	0.636711	0.611517	0.669775
					5.00778	0.637592	0.611824	0.670766
					5.13219	0.638267	0.612211	0.671711
					5.25661	0.638942	0.612599	0.672655
					5.38103	0.639617	0.612986	0.6736
					5.50544	0.640296	0.613363	0.674545
					5.62986	0.641065	0.613509	0.675489
					5.75428	0.641833	0.613654	0.676432
					5.87869	0.642602	0.6138	0.677376
					6.00311	0.643357	0.613941	0.678309
					6.12753	0.643564	0.613901	0.678831
					6.25195	0.643771	0.61386	0.679354
					6.37636	0.643978	0.61382	0.679876
					6.50078	0.644186	0.613779	0.680398
					6.62519	0.644646	0.613634	0.68102
					6.74961	0.645105	0.613489	0.681642
					6.87403	0.645564	0.613344	0.682263
					6.99845	0.646024	0.613199	0.682885
					7.12286	0.646387	0.613204	0.682624
					7.24728	0.646748	0.61321	0.682353
					7.3717	0.64711	0.613217	0.68208
					7.49611	0.647472	0.613224	0.681809
					7.62053	0.647999	0.613236	0.681566
					7.74495	0.648531	0.613249	0.681325
					7.86936	0.649064	0.613262	0.681084
					7.99378	0.649596	0.613274	0.680843
					8.1182	0.649702	0.613364	0.680627
					8.24261	0.649786	0.613459	0.680412
					8.36703	0.649869	0.613553	0.680197
					8.49145	0.649952	0.613648	0.679982
					8.61586	0.650173	0.613609	0.679519
					8.74028	0.650404	0.61356	0.679037
					8.8647	0.650636	0.613511	0.678556
					8.98911	0.650867	0.613463	0.678074
					9.11353	0.65089	0.613199	0.677855
					9.23795	0.650892	0.612914	0.677662
					9.36237	0.650895	0.61263	0.677468
					9.48678	0.650897	0.612345	0.677274
					9.6112	0.650764	0.612216	0.676859
					9.73561	0.650615	0.612106	0.676417
					9.86003	0.650466	0.611996	0.675975
					9.98445	0.650317	0.611886	0.675532
					10.1089	0.650286	0.611667	0.674878
					10.2333	0.650273	0.611433	0.674192
					10.3577	0.650259	0.611198	0.673507
					10.4821	0.650245	0.610964	0.672821
					10.6065	0.650185	0.610802	0.672257
					10.7309	0.650118	0.610653	0.671713
					10.8554	0.650051	0.610503	0.671169
					10.9798	0.649984	0.610354	0.670625
					11.1042	0.649976	0.609916	0.669798
					11.2286	0.649979	0.609422	0.668916
					11.353	0.649983	0.608928	0.668034
					11.4774	0.649987	0.608434	0.667152
					11.6019	0.649706	0.608241	0.666469
					11.7263	0.649362	0.608114	0.665831
					11.8507	0.649018	0.607987	0.665193
					11.9751	0.648673	0.60786	0.664554
					12.0995	0.648322	0.607932	0.663963
					12.224	0.647968	0.608055	0.663383
					12.3484	0.647615	0.608177	0.662803
					12.4728	0.647261	0.6083	0.662224
					12.5972	0.646929	0.608335	0.661553
					12.7216	0.646603	0.608346	0.660856
					12.846	0.646278	0.608356	0.660159
					12.9704	0.645952	0.608367	0.659462
					13.0949	0.645581	0.608001	0.658697
					13.2193	0.645195	0.607517	0.65791
					13.3437	0.64481	0.607033	0.657124
					13.4681	0.644424	0.606549	0.656337
					13.5925	0.643863	0.606395	0.655494
					13.717	0.643241	0.606355	0.654633
					13.8414	0.642619	0.606314	0.653771
					13.9658	0.641997	0.606274	0.652909
					14.0902	0.641435	0.605959	0.652067
					14.2146	0.640897	0.60554	0.651233
					14.339	0.640359	0.605121	0.650399
					14.4634	0.639821	0.604702	0.649564
					14.5879	0.639402	0.604076	0.648663
					14.7123	0.639034	0.603363	0.647733
					14.8367	0.638665	0.602651	0.646803
					14.9611	0.638296	0.601938	0.645873
					15.0855	0.637977	0.601448	0.644957
					15.2099	0.63768	0.601059	0.644047
					15.3344	0.637384	0.600669	0.643137
					15.4588	0.637087	0.60028	0.642227
					15.5832	0.636758	0.599754	0.641347
					15.7076	0.636412	0.599159	0.640482
					15.832	0.636066	0.598564	0.639617
					15.9565	0.635721	0.597969	0.638752
					16.0809	0.635436	0.597354	0.638099
					16.2053	0.635185	0.596729	0.637561
					16.3297	0.634933	0.596104	0.637022
					16.4541	0.634682	0.595479	0.636484
					16.5785	0.634267	0.594663	0.635653
					16.703	0.633756	0.593735	0.634652
					16.8274	0.633245	0.592808	0.633651
					16.9518	0.632734	0.59188	0.632649
					17.0762	0.632273	0.591117	0.631854
					17.2006	0.631844	0.590459	0.631191
					17.325	0.631415	0.5898	0.630528
					17.4495	0.630985	0.589142	0.629865
					17.5739	0.630469	0.58845	0.62905
					17.6983	0.629892	0.587737	0.628133
					17.8227	0.629315	0.587023	0.627215
					17.9471	0.628738	0.58631	0.626297
					18.0715	0.628083	0.585473	0.625518
					18.196	0.62737	0.584546	0.624842
					18.3204	0.626658	0.583619	0.624167
					18.4448	0.625945	0.582692	0.623491
					18.5692	0.625467	0.581902	0.622728
					18.6936	0.625177	0.581221	0.621896
					18.818	0.624887	0.58054	0.621064
					18.9425	0.624597	0.579859	0.620232
					19.0669	0.624177	0.57924	0.619213
					19.1913	0.623646	0.578675	0.618034
					19.3157	0.623115	0.57811	0.616855
					19.4401	0.622584	0.577545	0.615676
					19.5645	0.621973	0.576729	0.61469
					19.689	0.621286	0.57568	0.613885
					19.8134	0.6206	0.574631	0.613079
					19.9378	0.619913	0.573581	0.612273
					20.0622	0.61944	0.57269	0.61136
					20.1866	0.619179	0.571956	0.61034
					20.311	0.618919	0.571222	0.60932
					20.4355	0.618659	0.570488	0.6083
					20.5599	0.618393	0.569809	0.607337
					20.6843	0.618121	0.569188	0.606433
					20.8087	0.617849	0.568568	0.60553
					20.9331	0.617576	0.567947	0.604627
					21.0575	0.617171	0.567347	0.603723
					21.182	0.61661	0.566771	0.602817
					21.3064	0.616049	0.566195	0.601911
					21.4308	0.615489	0.56562	0.601006
					21.5552	0.61498	0.565005	0.599935
					21.6796	0.614537	0.564342	0.598658
					21.8041	0.614094	0.56368	0.597381
					21.9285	0.61365	0.563017	0.596104
					22.0529	0.613338	0.562394	0.594868
					22.1773	0.613203	0.561823	0.593686
					22.3017	0.613067	0.561253	0.592505
					22.4261	0.612932	0.560682	0.591324
					22.5506	0.612617	0.560151	0.590161
					22.675	0.612039	0.559677	0.589027
					22.7994	0.611461	0.559203	0.587893
					22.9238	0.610883	0.558728	0.586759
					23.0482	0.610471	0.558169	0.585588
					23.1726	0.610323	0.557473	0.584357
					23.297	0.610175	0.556777	0.583127
					23.4215	0.610027	0.556081	0.581897
					23.5459	0.60973	0.555416	0.580716
					23.6703	0.609179	0.554803	0.579621
					23.7947	0.608628	0.55419	0.578526
					23.9191	0.608077	0.553577	0.577431
					24.0435	0.607649	0.553098	0.576313
					24.168	0.607449	0.552867	0.575153
					24.2924	0.607249	0.552637	0.573993
					24.4168	0.607049	0.552406	0.572833
					24.5412	0.60684	0.551931	0.571676
					24.6656	0.606611	0.550959	0.570527
					24.7901	0.606383	0.549987	0.569378
					24.9145	0.606155	0.549014	0.568228
					25.0389	0.605954	0.548158	0.566968
					25.1633	0.605815	0.547558	0.565463
					25.2877	0.605677	0.546958	0.563957
					25.4121	0.605538	0.546358	0.562452
					25.5365	0.605395	0.545729	0.561091
					25.661	0.605243	0.545032	0.560078
					25.7854	0.605091	0.544334	0.559065
					25.9098	0.604939	0.543636	0.558052
					26.0342	0.604713	0.542929	0.556883
					26.1586	0.604293	0.542193	0.555305
					26.283	0.603873	0.541457	0.553727
					26.4075	0.603453	0.540721	0.552148
					26.5319	0.603151	0.54011	0.550626
					26.6563	0.603195	0.539859	0.549268
					26.7807	0.603238	0.539609	0.54791
					26.9051	0.603282	0.539359	0.546552
					27.0296	0.603298	0.53907	0.545284
					27.154	0.603225	0.538656	0.544302
					27.2784	0.603152	0.538242	0.54332
					27.4028	0.603079	0.537829	0.542339
					27.5272	0.603033	0.537349	0.541261
					27.6516	0.603086	0.536634	0.539837
					27.7761	0.603139	0.535918	0.538413
					27.9005	0.603192	0.535203	0.53699
					28.0249	0.603185	0.534518	0.535588
					28.1493	0.602935	0.533957	0.534275
					28.2737	0.602685	0.533395	0.532963
					28.3981	0.602436	0.532834	0.53165
					28.5225	0.602198	0.532256	0.53038
					28.647	0.602013	0.531605	0.529308
					28.7714	0.601829	0.530953	0.528235
					28.8958	0.601644	0.530302	0.527162
					29.0202	0.601495	0.529663	0.526076
					29.1446	0.601527	0.529091	0.524923
					29.2691	0.601559	0.528519	0.523769
					29.3935	0.601592	0.527946	0.522615
					29.5179	0.601636	0.52737	0.521465
					29.6423	0.601753	0.526775	0.520333
					29.7667	0.601869	0.526179	0.519201
					29.8911	0.601985	0.525584	0.51807
					30.0156	0.60208	0.525015	0.517003
					30.14	0.602021	0.52464	0.516396
					30.2644	0.601963	0.524265	0.515788
					30.3888	0.601904	0.52389	0.515181
					30.5132	0.601844	0.523522	0.514573
					30.6376	0.601766	0.523214	0.513967
					30.762	0.601688	0.522906	0.513361
					30.8865	0.60161	0.522598	0.512755
					31.0109	0.601545	0.52229	0.512145
					31.1353	0.601613	0.521983	0.511488
					31.2597	0.601682	0.521675	0.510831
					31.3841	0.601751	0.521367	0.510175
					31.5085	0.601818	0.521041	0.509537
					31.633	0.601855	0.520459	0.509155
					31.7574	0.601892	0.519876	0.508772
					31.8818	0.601929	0.519294	0.50839
					32.0062	0.601962	0.5187	0.508004
					32.1306	0.601901	0.517893	0.507556
					32.255	0.60184	0.517086	0.507107
					32.3795	0.601779	0.516278	0.506658
					32.5039	0.601712	0.515489	0.506206
					32.6283	0.601463	0.515288	0.505632
					32.7527	0.601213	0.515087	0.505058
					32.8771	0.600964	0.514886	0.504484
					33.0016	0.600717	0.514682	0.503912
					33.126	0.600713	0.5142	0.50352
					33.2504	0.60071	0.513718	0.503128
					33.3748	0.600706	0.513236	0.502737
					33.4992	0.600702	0.512754	0.502345
					33.6236	0.600639	0.512595	0.502007
					33.7481	0.600575	0.512438	0.501669
					33.8725	0.60051	0.512281	0.501331
					33.9969	0.600446	0.512125	0.500993
					34.1213	0.60067	0.511731	0.500455
					34.2457	0.600902	0.511332	0.499912
					34.3701	0.601134	0.510932	0.499369
					34.4946	0.601365	0.510533	0.498826
					34.619	0.601335	0.509998	0.498564
					34.7434	0.601293	0.509457	0.498314
					34.8678	0.60125	0.508917	0.498065
					34.9922	0.601208	0.508376	0.497816
					35.1166	0.60115	0.508231	0.497511
					35.2411	0.601091	0.508113	0.497202
					35.3655	0.601032	0.507995	0.496893
					35.4899	0.600973	0.507877	0.496584
					35.6143	0.601162	0.507636	0.496198
					35.7387	0.601372	0.507384	0.495806
					35.8631	0.601583	0.507132	0.495413
					35.9876	0.601794	0.506881	0.49502
					36.112	0.601805	0.506742	0.494709
					36.2364	0.601793	0.506617	0.494407
					36.3608	0.601782	0.506491	0.494106
					36.4852	0.60177	0.506365	0.493804
					36.6096	0.601691	0.5061	0.493393
					36.7341	0.601602	0.505816	0.492967
					36.8585	0.601514	0.505531	0.492541
					36.9829	0.601425	0.505247	0.492115
					37.1073	0.601499	0.504984	0.4917
					37.2317	0.601598	0.504725	0.491287
					37.3561	0.601698	0.504466	0.490874
					37.4806	0.601798	0.504207	0.49046
					37.605	0.601699	0.503925	0.490071
					37.7294	0.601562	0.503639	0.489686
					37.8538	0.601426	0.503354	0.489302
					37.9782	0.601289	0.503068	0.488917
					38.1026	0.60137	0.503007	0.4887
					38.2271	0.601497	0.502994	0.488519
					38.3515	0.601624	0.502981	0.488338
					38.4759	0.601751	0.502968	0.488157
					38.6003	0.601839	0.502641	0.48797
					38.7247	0.601917	0.502239	0.487783
					38.8491	0.601995	0.501836	0.487595
					38.9736	0.602073	0.501434	0.487407
					39.098	0.601937	0.501297	0.486986
					39.2224	0.601743	0.501234	0.486502
					39.3468	0.601549	0.50117	0.486017
					39.4712	0.601355	0.501106	0.485533
					39.5956	0.601337	0.501095	0.485115
					39.7201	0.601372	0.5011	0.484718
					39.8445	0.601408	0.501105	0.48432
					39.9689	0.601443	0.50111	0.483923
					40.0933	0.601661	0.500925	0.483694
					40.2177	0.60194	0.500676	0.483522
					40.3421	0.60222	0.500427	0.48335
					40.4666	0.602499	0.500178	0.483179
					40.591	0.602716	0.499896	0.48303
					40.7154	0.60291	0.499602	0.482891
					40.8398	0.603104	0.499308	0.482752
					40.9642	0.603298	0.499014	0.482613
					41.0887	0.603389	0.498957	0.482251
					41.2131	0.603439	0.498998	0.481799
					41.3375	0.60349	0.499038	0.481347
					41.4619	0.60354	0.499078	0.480895
					41.5863	0.603371	0.49889	0.48064
					41.7107	0.603105	0.4986	0.480473
					41.8351	0.602839	0.498309	0.480306
					41.9596	0.602574	0.498019	0.480139
					42.084	0.602474	0.497685	0.479874
					42.2084	0.602454	0.49733	0.479562
					42.3328	0.602435	0.496975	0.47925
					42.4572	0.602415	0.49662	0.478937
					42.5817	0.602466	0.496367	0.478857
					42.7061	0.602555	0.496168	0.478899
					42.8305	0.602644	0.49597	0.478942
					42.9549	0.602733	0.495771	0.478984
					43.0793	0.602429	0.495634	0.479009
					43.2037	0.601901	0.495531	0.479023
					43.3282	0.601373	0.495429	0.479038
					43.4526	0.600845	0.495326	0.479052
					43.577	0.600493	0.495236	0.479374
					43.7014	0.60025	0.495152	0.479887
					43.8258	0.600007	0.495069	0.4804
					43.9502	0.599764	0.494986	0.480913
					44.0746	0.599513	0.495208	0.481264
					44.1991	0.599258	0.495636	0.481508
					44.3235	0.599002	0.496063	0.481751
					44.4479	0.598747	0.49649	0.481995
					44.5723	0.598334	0.496609	0.48227
					44.6967	0.597806	0.496503	0.482567
					44.8212	0.597279	0.496398	0.482865
					44.9456	0.596751	0.496292	0.483163
					45.07	0.596381	0.496248	0.483617
					45.1944	0.596132	0.496252	0.484194
					45.3188	0.595884	0.496256	0.484771
					45.4432	0.595635	0.49626	0.485349
					45.5677	0.595496	0.496248	0.4858
					45.6921	0.595449	0.496221	0.486146
					45.8165	0.595401	0.496195	0.486491
					45.9409	0.595354	0.496169	0.486837
					46.0653	0.595278	0.496294	0.487229
					46.1897	0.595176	0.496558	0.487665
					46.3141	0.595074	0.496822	0.488101
					46.4386	0.594973	0.497086	0.488536
					46.563	0.594862	0.497331	0.489105
					46.6874	0.594741	0.497555	0.489805
					46.8118	0.594621	0.49778	0.490504
					46.9362	0.5945	0.498005	0.491204
					47.0607	0.594299	0.498157	0.491857
					47.1851	0.594012	0.498233	0.49246
					47.3095	0.593726	0.498308	0.493064
					47.4339	0.593439	0.498384	0.493668
					47.5583	0.593173	0.498435	0.49431
					47.6827	0.59293	0.498455	0.494994
					47.8072	0.592688	0.498477	0.495679
					47.9316	0.592445	0.498498	0.496364
					48.056	0.592222	0.498476	0.496978
					48.1804	0.592026	0.498401	0.497506
					48.3048	0.591829	0.498325	0.498034
					48.4292	0.591632	0.49825	0.498562
					48.5537	0.591565	0.498273	0.498961
					48.6781	0.591671	0.498427	0.49919
					48.8025	0.591776	0.498581	0.499419
					48.9269	0.591882	0.498734	0.499648
					49.0513	0.591838	0.498917	0.499877
					49.1757	0.591579	0.499142	0.500107
					49.3002	0.59132	0.499368	0.500336
					49.4246	0.591061	0.499593	0.500566
					49.549	0.590762	0.49971	0.500728
					49.6734	0.590401	0.499659	0.500786
					49.7978	0.590041	0.499609	0.500844
					49.9222	0.58968	0.499558	0.500901
					50.0467	0.589343	0.499564	0.500959
					50.1711	0.589046	0.499665	0.501018
					50.2955	0.588749	0.499767	0.501076
					50.4199	0.588452	0.499868	0.501135
					50.5443	0.588182	0.499966	0.501127
					50.6687	0.587964	0.500058	0.501
					50.7932	0.587746	0.500151	0.500873
					50.9176	0.587529	0.500244	0.500747
					51.042	0.587202	0.500235	0.500725
					51.1664	0.586662	0.500027	0.500912
					51.2908	0.586122	0.499818	0.5011
					51.4152	0.585582	0.49961	0.501287
					51.5397	0.585144	0.499474	0.501469
					51.6641	0.584924	0.499495	0.501637
					51.7885	0.584704	0.499516	0.501806
					51.9129	0.584484	0.499537	0.501975
					52.0373	0.584254	0.499604	0.502196
					52.1617	0.584002	0.499778	0.502541
					52.2862	0.583749	0.499952	0.502885
					52.4106	0.583496	0.500126	0.50323
					52.535	0.583333	0.500233	0.503479
					52.6594	0.583399	0.500169	0.503482
					52.7838	0.583466	0.500105	0.503485
					52.9083	0.583532	0.500041	0.503488
					53.0327	0.583678	0.500045	0.503597
					53.1571	0.584049	0.500239	0.504008
					53.2815	0.58442	0.500434	0.504419
					53.4059	0.584791	0.500628	0.504829
					53.5303	0.585088	0.500771	0.505269
					53.6547	0.58515	0.500753	0.5058
					53.7792	0.585212	0.500734	0.50633
					53.9036	0.585275	0.500716	0.506861
					54.028	0.585379	0.500786	0.507345
					54.1524	0.585627	0.501165	0.507667
					54.2768	0.585875	0.501544	0.507988
					54.4012	0.586123	0.501922	0.50831
					54.5257	0.58633	0.502309	0.508676
					54.6501	0.586375	0.50273	0.509214
					54.7745	0.586421	0.503151	0.509752
					54.8989	0.586466	0.503572	0.51029
					55.0233	0.586543	0.503977	0.510803
					55.1478	0.586763	0.504311	0.511205
					55.2722	0.586982	0.504645	0.511608
					55.3966	0.587201	0.504978	0.512011
					55.521	0.587377	0.505312	0.512415
					55.6454	0.587335	0.505642	0.51283
					55.7698	0.587294	0.505973	0.513244
					55.8942	0.587252	0.506303	0.513658
					56.0187	0.587295	0.506625	0.514071
					56.1431	0.587823	0.506895	0.514475
					56.2675	0.58835	0.507166	0.514879
					56.3919	0.588877	0.507436	0.515283
					56.5163	0.589393	0.50776	0.515622
					56.6407	0.589836	0.50844	0.51552
					56.7652	0.590278	0.509119	0.515419
					56.8896	0.590721	0.509799	0.515317
					57.014	0.59122	0.510448	0.515218
					57.1384	0.592173	0.510847	0.515136
					57.2628	0.593126	0.511246	0.515054
					57.3873	0.594079	0.511645	0.514972
					57.5117	0.595003	0.512033	0.51488
					57.6361	0.595639	0.51232	0.514693
					57.7605	0.596275	0.512607	0.514506
					57.8849	0.59691	0.512893	0.51432
					58.0093	0.597604	0.513204	0.514173
					58.1337	0.599029	0.513827	0.514542
					58.2582	0.600455	0.51445	0.514911
					58.3826	0.60188	0.515073	0.51528
					58.507	0.603282	0.515685	0.515681
					58.6314	0.604271	0.516109	0.516648
					58.7558	0.605259	0.516532	0.517614
					58.8802	0.606248	0.516956	0.518581
					59.0047	0.607239	0.517367	0.519525
					59.1291	0.608293	0.517416	0.519848
					59.2535	0.609347	0.517464	0.520171
					59.3779	0.6104	0.517513	0.520494
					59.5023	0.611437	0.517573	0.520809
					59.6268	0.611492	0.518239	0.520637
					59.7512	0.611548	0.518904	0.520466
					59.8756	0.611604	0.51957	0.520295
					60	0.611659	0.520236	0.520123

## Sheet: G Statistics
Figure 4G - Statistical analysis
Kolmogorov-Smirnov Tests at 40 mins
S1/2B vs. +1				PSB	+1	-1
p	0.0005		N	402	419	428
D	0.1421
S1/2B vs. -1
p	<0.0001
D	0.1718
+1 vs. -1
p	0.1034
D	0.08364

## Sheet: H
Figure 4H	Interface alignment analysis over time for S2/3B, +1 and -1 interfaces
Data Points					LOWESS
Time after GBE onset (mins)	S2/3B	+1	-1		Time after GBE onset (mins)	S2/3B	+1	-1
-20	0.462264	0.430107	0.462264		-20	0.471946	0.422283	0.463399
-19.5	0.485981	0.438775	0.472222		-19.8756	0.471926	0.422538	0.463305
-19	0.485981	0.412371	0.46729		-19.7512	0.471906	0.422793	0.463211
-18.5	0.477064	0.43	0.449541		-19.6268	0.471886	0.423048	0.463118
-18	0.476635	0.42	0.46789		-19.5023	0.471867	0.423302	0.463024
-17.5	0.411215	0.417476	0.481482		-19.3779	0.470786	0.423397	0.462536
-17	0.491071	0.441177	0.442478		-19.2535	0.469685	0.423488	0.462041
-16.5	0.442478	0.451923	0.434783		-19.1291	0.468583	0.42358	0.461546
-16	0.460177	0.445545	0.469027		-19.0047	0.467482	0.423671	0.461051
-15.5	0.460177	0.460784	0.464912		-18.8803	0.466728	0.42484	0.460872
-15	0.467213	0.45045	0.475		-18.7558	0.465989	0.426051	0.460705
-14.5	0.479675	0.455357	0.459016		-18.6314	0.465249	0.427262	0.460538
-14	0.487805	0.432432	0.484375		-18.507	0.464509	0.428472	0.460371
-13.5	0.488	0.444445	0.472441		-18.3826	0.46432	0.429102	0.460749
-13	0.5	0.447205	0.441341		-18.2582	0.464164	0.429696	0.461159
-12.5	0.472222	0.443787	0.477011		-18.1337	0.464008	0.43029	0.46157
-12	0.514124	0.43956	0.465909		-18.0093	0.463852	0.430884	0.46198
-11.5	0.497175	0.438202	0.486034		-17.8849	0.463908	0.43166	0.461991
-11	0.494382	0.471591	0.49162		-17.7605	0.463982	0.432451	0.461968
-10.5	0.489011	0.463277	0.494382		-17.6361	0.464055	0.433242	0.461946
-10	0.497326	0.429378	0.508108		-17.5117	0.464129	0.434033	0.461924
-9.5	0.481081	0.44382	0.502762		-17.3873	0.465494	0.434811	0.461738
-9	0.486486	0.430939	0.475676		-17.2628	0.466993	0.435587	0.461535
-8.5	0.473404	0.469945	0.502618		-17.1384	0.468491	0.436364	0.461332
-8	0.484043	0.456522	0.52356		-17.014	0.46999	0.43714	0.461129
-7.5	0.470588	0.450549	0.494624		-16.8896	0.470221	0.437506	0.461631
-7	0.5	0.483333	0.487437		-16.7652	0.470292	0.437821	0.462222
-6.5	0.507692	0.456044	0.532338		-16.6408	0.470363	0.438135	0.462813
-6	0.510526	0.478022	0.512438		-16.5163	0.470434	0.438449	0.463404
-5.5	0.510309	0.51087	0.522388		-16.3919	0.471224	0.438608	0.464147
-5	0.497462	0.494565	0.510101		-16.2675	0.472124	0.438744	0.464914
-4.5	0.485294	0.513369	0.532663		-16.1431	0.473023	0.438879	0.46568
-4	0.52451	0.505376	0.540404		-16.0187	0.473923	0.439014	0.466447
-3.5	0.538835	0.529412	0.535354		-15.8942	0.474588	0.439227	0.466829
-3	0.521951	0.570681	0.545		-15.7698	0.475212	0.439454	0.467144
-2.5	0.546342	0.563158	0.558824		-15.6454	0.475836	0.439681	0.467458
-2	0.523365	0.53886	0.568627		-15.521	0.476459	0.439908	0.467773
-1.5	0.524038	0.558974	0.588235		-15.3966	0.477068	0.439952	0.468196
-1	0.520548	0.567164	0.587678		-15.2722	0.477673	0.43996	0.468641
-0.5	0.55	0.557692	0.576577		-15.1478	0.478279	0.439968	0.469085
0	0.561947	0.576037	0.581818		-15.0233	0.478884	0.439976	0.46953
0.5	0.595745	0.609244	0.582979		-14.8989	0.479391	0.4401	0.469913
1	0.607287	0.613821	0.593626		-14.7745	0.479874	0.440251	0.470282
1.5	0.592742	0.626016	0.588235		-14.6501	0.480358	0.440403	0.470652
2	0.615686	0.6	0.642857		-14.5257	0.480841	0.440554	0.471021
2.5	0.623077	0.625468	0.64794		-14.4012	0.481175	0.440661	0.471601
3	0.621818	0.647687	0.67029		-14.2768	0.481471	0.440757	0.472236
3.5	0.642857	0.632143	0.624113		-14.1524	0.481766	0.440853	0.472872
4	0.622449	0.641115	0.649485		-14.028	0.482062	0.440948	0.473507
4.5	0.640138	0.637631	0.643098		-13.9036	0.482268	0.441294	0.473919
5	0.636364	0.648562	0.666667		-13.7792	0.482447	0.441711	0.474267
5.5	0.636943	0.683544	0.646302		-13.6547	0.482626	0.44213	0.474614
6	0.664537	0.648148	0.680645		-13.5303	0.482806	0.442547	0.474962
6.5	0.663522	0.663609	0.661442		-13.4059	0.482989	0.44287	0.475461
7	0.636086	0.682779	0.68652		-13.2815	0.483175	0.443161	0.47601
7.5	0.640118	0.672515	0.638235		-13.1571	0.48336	0.443453	0.476558
8	0.649123	0.653846	0.660819		-13.0327	0.483545	0.443745	0.477107
8.5	0.640668	0.660112	0.659155		-12.9082	0.483628	0.444041	0.478001
9	0.649456	0.633333	0.65625		-12.7838	0.483675	0.444339	0.479019
9.5	0.639566	0.671233	0.66759		-12.6594	0.483721	0.444637	0.480037
10	0.646277	0.65508	0.646739		-12.535	0.483768	0.444935	0.481055
10.5	0.641361	0.67268	0.639037		-12.4106	0.484095	0.445307	0.481783
11	0.654822	0.622108	0.623037		-12.2862	0.484532	0.445708	0.482399
11.5	0.627161	0.640587	0.643979		-12.1617	0.48497	0.446109	0.483014
12	0.635236	0.619165	0.645244		-12.0373	0.485407	0.44651	0.48363
12.5	0.627119	0.621554	0.632911		-11.9129	0.485472	0.447005	0.484388
13	0.641647	0.643374	0.638191		-11.7885	0.485379	0.44754	0.485209
13.5	0.63145	0.615196	0.618557		-11.6641	0.485285	0.448075	0.486029
14	0.63789	0.623501	0.618812		-11.5397	0.485191	0.44861	0.486849
14.5	0.640777	0.603448	0.622222		-11.4152	0.485256	0.449223	0.487532
15	0.620525	0.619617	0.623116		-11.2908	0.485394	0.449872	0.48815
15.5	0.639423	0.604706	0.599514		-11.1664	0.485532	0.450521	0.488769
16	0.633971	0.644231	0.577197		-11.042	0.48567	0.45117	0.489387
16.5	0.629717	0.621749	0.603774		-10.9176	0.48585	0.4516	0.489996
17	0.615385	0.615023	0.596659		-10.7932	0.486051	0.451917	0.4906
17.5	0.611494	0.627635	0.589623		-10.6687	0.486252	0.452234	0.491204
18	0.600462	0.606557	0.599537		-10.5443	0.486453	0.452552	0.491807
18.5	0.608076	0.616868	0.591549		-10.4199	0.486724	0.453017	0.492427
19	0.605991	0.582339	0.587963		-10.2955	0.487035	0.453565	0.493057
19.5	0.643836	0.604819	0.577367		-10.1711	0.487346	0.454112	0.493686
20	0.612756	0.594406	0.542411		-10.0467	0.487656	0.45466	0.494315
20.5	0.608108	0.591549	0.54343		-9.92224	0.487931	0.455583	0.494872
21	0.615034	0.598592	0.560268		-9.79782	0.488184	0.45673	0.495386
21.5	0.621315	0.585421	0.567929		-9.67341	0.488437	0.457878	0.4959
22	0.611973	0.605381	0.54382		-9.54899	0.48869	0.459026	0.496414
22.5	0.617778	0.598194	0.56		-9.42457	0.489108	0.460164	0.497014
23	0.631347	0.589286	0.567265		-9.30016	0.489633	0.461295	0.497671
23.5	0.630531	0.570797	0.546875		-9.17574	0.490158	0.462426	0.498327
24	0.610245	0.584687	0.549774		-9.05132	0.490683	0.463557	0.498984
24.5	0.633257	0.581236	0.543379		-8.9269	0.491204	0.46489	0.499908
25	0.614512	0.582938	0.534521		-8.80249	0.491722	0.466364	0.501018
25.5	0.638051	0.549199	0.543326		-8.67807	0.492239	0.467838	0.502129
26	0.621381	0.561485	0.578231		-8.55365	0.492757	0.469313	0.50324
26.5	0.607224	0.57631	0.511261		-8.42924	0.493407	0.470591	0.504215
27	0.625821	0.576577	0.529545		-8.30482	0.494159	0.47172	0.505086
27.5	0.631579	0.577273	0.52809		-8.1804	0.494911	0.472849	0.505958
28	0.623913	0.558296	0.541485		-8.05599	0.495663	0.473977	0.50683
28.5	0.634529	0.583144	0.537611		-7.93157	0.496375	0.475286	0.507608
29	0.608597	0.543779	0.528634		-7.80715	0.497055	0.476741	0.508309
29.5	0.628118	0.571429	0.55102		-7.68274	0.497735	0.478196	0.50901
30	0.625581	0.554524	0.514739		-7.55832	0.498416	0.47965	0.50971
30.5	0.618483	0.569087	0.524775		-7.4339	0.499233	0.481228	0.510668
31	0.615202	0.545872	0.537585		-7.30949	0.50017	0.482914	0.511853
31.5	0.623501	0.552752	0.530752		-7.18507	0.501108	0.4846	0.513038
32	0.650367	0.559242	0.525581		-7.06065	0.502045	0.486287	0.514222
32.5	0.612048	0.50591	0.527778		-6.93624	0.502836	0.487829	0.515514
33	0.625	0.528037	0.505882		-6.81182	0.503489	0.489236	0.516907
33.5	0.61596	0.556901	0.497619		-6.6874	0.504141	0.490642	0.5183
34	0.634383	0.55	0.50939		-6.56299	0.504793	0.492048	0.519693
34.5	0.615012	0.542857	0.51699		-6.43857	0.505452	0.493708	0.520845
35	0.615764	0.52381	0.5		-6.31415	0.506118	0.495629	0.52175
35.5	0.613527	0.531401	0.481043		-6.18973	0.506783	0.49755	0.522654
36	0.582927	0.529268	0.49409		-6.06532	0.507449	0.49947	0.523558
36.5	0.6	0.54321	0.510791		-5.9409	0.508159	0.501335	0.524628
37	0.609453	0.543424	0.512077		-5.81649	0.508919	0.503138	0.52588
37.5	0.613692	0.541562	0.495261		-5.69207	0.509679	0.50494	0.527133
38	0.62341	0.541772	0.495283		-5.56765	0.51044	0.506742	0.528385
38.5	0.629534	0.517241	0.52093		-5.44323	0.511268	0.508419	0.529625
39	0.625	0.543641	0.504695		-5.31882	0.512179	0.509944	0.53085
39.5	0.637306	0.529563	0.481482		-5.1944	0.513091	0.511469	0.532075
40	0.631579	0.531486	0.50939		-5.06998	0.514002	0.512995	0.5333
40.5	0.605128	0.52231	0.515587		-4.94557	0.515059	0.514678	0.534649
41	0.568831	0.521277	0.518248		-4.82115	0.516304	0.516563	0.536158
41.5	0.606383	0.531915	0.501228		-4.69673	0.51755	0.518449	0.537667
42	0.62259	0.539084	0.526582		-4.57232	0.518795	0.520335	0.539176
42.5	0.615599	0.490305	0.498741		-4.4479	0.520184	0.52218	0.540621
43	0.627072	0.516575	0.512315		-4.32348	0.521773	0.523969	0.541976
43.5	0.628169	0.507003	0.509044		-4.19907	0.523361	0.525758	0.543332
44	0.612637	0.512676	0.510101		-4.07465	0.52495	0.527547	0.544687
44.5	0.607629	0.513889	0.517677		-3.95023	0.526405	0.529435	0.546058
45	0.592896	0.547059	0.52551		-3.82582	0.527662	0.531473	0.547453
45.5	0.613445	0.535503	0.532467		-3.7014	0.528918	0.533511	0.548847
46	0.620397	0.520958	0.485488		-3.57698	0.530174	0.535548	0.550241
46.5	0.614943	0.512658	0.517808		-3.45257	0.53142	0.537518	0.551714
47	0.622857	0.530675	0.513587		-3.32815	0.532649	0.539375	0.553315
47.5	0.621469	0.512048	0.516667		-3.20373	0.533878	0.541233	0.554916
48	0.617816	0.52795	0.516484		-3.07931	0.535106	0.543091	0.556517
48.5	0.606607	0.517572	0.489071		-2.9549	0.536471	0.544791	0.558121
49	0.616314	0.537975	0.509537		-2.83048	0.538074	0.546214	0.559732
49.5	0.618012	0.516026	0.540984		-2.70607	0.539678	0.547636	0.561342
50	0.617555	0.523962	0.507289		-2.58165	0.541281	0.549058	0.562953
50.5	0.611285	0.493789	0.505747		-2.45723	0.542824	0.550544	0.564544
51	0.613418	0.516234	0.508772		-2.33282	0.544248	0.552151	0.566097
51.5	0.600639	0.508361	0.489675		-2.2084	0.545673	0.553759	0.567651
52	0.62215	0.508251	0.5		-2.08398	0.547098	0.555366	0.569205
52.5	0.641196	0.490132	0.53481		-1.95956	0.548662	0.557108	0.570753
53	0.636364	0.511706	0.504886		-1.83515	0.550515	0.55913	0.572288
53.5	0.641638	0.517482	0.52459		-1.71073	0.552368	0.561152	0.573823
54	0.597173	0.501718	0.522876		-1.58631	0.554222	0.563174	0.575358
54.5	0.639576	0.512367	0.521173		-1.4619	0.556113	0.565145	0.576844
55	0.630189	0.518116	0.518395		-1.33748	0.558087	0.566998	0.578218
55.5	0.610909	0.548148	0.512111		-1.21306	0.560063	0.568851	0.579593
56	0.626459	0.519841	0.512027		-1.08865	0.562037	0.570705	0.580967
56.5	0.612245	0.516807	0.491349		-0.96423	0.564063	0.57255	0.582367
57	0.609756	0.530172	0.51049		-0.839813	0.566211	0.574377	0.583832
57.5	0.617117	0.536083	0.514523		-0.715396	0.56836	0.576204	0.585296
58	0.6	0.528497	0.504274		-0.590979	0.570509	0.578031	0.586761
58.5	0.634703	0.544041	0.504167		-0.466563	0.572584	0.579913	0.588287
59	0.590476	0.526316	0.523013		-0.342146	0.574457	0.581945	0.589978
59.5	0.595238	0.533708	0.527197		-0.217729	0.576331	0.583978	0.591669
60	0.619289	0.540698	0.532189		-0.0933123	0.578204	0.58601	0.59336
					0.0311045	0.580059	0.588001	0.595051
					0.155521	0.581858	0.58987	0.596741
					0.279938	0.583658	0.591739	0.598432
					0.404355	0.585457	0.593608	0.600122
					0.528772	0.587167	0.595388	0.601821
					0.653188	0.588577	0.596874	0.603547
					0.777605	0.589988	0.598359	0.605273
					0.902022	0.591399	0.599845	0.606999
					1.02644	0.592782	0.601323	0.608703
					1.15086	0.594065	0.602773	0.610323
					1.27527	0.595348	0.604223	0.611943
					1.39969	0.596631	0.605673	0.613563
					1.52411	0.597953	0.607092	0.615201
					1.64852	0.599437	0.608381	0.616912
					1.77294	0.600922	0.609671	0.618624
					1.89736	0.602406	0.610961	0.620336
					2.02177	0.603838	0.612308	0.621923
					2.14619	0.605018	0.613929	0.622918
					2.27061	0.606199	0.61555	0.623913
					2.39502	0.607379	0.617171	0.624908
					2.51944	0.608541	0.618737	0.625887
					2.64386	0.609601	0.620008	0.626784
					2.76827	0.610661	0.621279	0.62768
					2.89269	0.611722	0.622549	0.628576
					3.01711	0.61278	0.623775	0.629424
					3.14153	0.613823	0.624716	0.629971
					3.26594	0.614866	0.625657	0.630518
					3.39036	0.61591	0.626598	0.631064
					3.51478	0.616915	0.627557	0.631675
					3.63919	0.617639	0.628647	0.632758
					3.76361	0.618363	0.629737	0.633841
					3.88802	0.619087	0.630827	0.634924
					4.01244	0.619832	0.631899	0.635967
					4.13686	0.62077	0.632804	0.636647
					4.26128	0.621708	0.63371	0.637326
					4.38569	0.622646	0.634616	0.638006
					4.51011	0.623561	0.635518	0.638685
					4.63453	0.624209	0.636385	0.639365
					4.75894	0.624857	0.637251	0.640045
					4.88336	0.625504	0.638118	0.640725
					5.00778	0.626151	0.638969	0.641379
					5.13219	0.626779	0.639593	0.641659
					5.25661	0.627408	0.640217	0.641939
					5.38103	0.628036	0.640842	0.642218
					5.50544	0.628661	0.641441	0.642506
					5.62986	0.629214	0.641489	0.642958
					5.75428	0.629767	0.641538	0.64341
					5.87869	0.63032	0.641586	0.643863
					6.00311	0.630862	0.641643	0.644302
					6.12753	0.630979	0.642034	0.644203
					6.25195	0.631096	0.642425	0.644105
					6.37636	0.631213	0.642817	0.644007
					6.50078	0.631329	0.643206	0.643909
					6.62519	0.63138	0.643281	0.643953
					6.74961	0.631431	0.643355	0.643996
					6.87403	0.631482	0.64343	0.644039
					6.99845	0.631533	0.643505	0.644082
					7.12286	0.631875	0.643206	0.643691
					7.24728	0.63222	0.642903	0.643294
					7.3717	0.632565	0.642599	0.642897
					7.49611	0.63291	0.642296	0.642501
					7.62053	0.633151	0.641997	0.642616
					7.74495	0.633389	0.641698	0.642748
					7.86936	0.633627	0.641399	0.642881
					7.99378	0.633865	0.6411	0.643013
					8.1182	0.633939	0.640922	0.642773
					8.24261	0.634005	0.640751	0.642513
					8.36703	0.634071	0.64058	0.642252
					8.49145	0.634136	0.640409	0.641992
					8.61586	0.634259	0.64007	0.641648
					8.74028	0.634386	0.639718	0.641298
					8.8647	0.634513	0.639367	0.640947
					8.98911	0.63464	0.639015	0.640597
					9.11353	0.63462	0.638914	0.640177
					9.23795	0.634586	0.638836	0.63975
					9.36237	0.634551	0.638758	0.639324
					9.48678	0.634517	0.63868	0.638898
					9.6112	0.634556	0.6381	0.638234
					9.73561	0.634603	0.637459	0.637541
					9.86003	0.63465	0.636819	0.636849
					9.98445	0.634697	0.636178	0.636157
					10.1089	0.634622	0.635668	0.635605
					10.2333	0.634529	0.635176	0.635073
					10.3577	0.634437	0.634685	0.634541
					10.4821	0.634344	0.634193	0.634008
					10.6065	0.634254	0.633455	0.633479
					10.7309	0.634164	0.632676	0.632951
					10.8554	0.634075	0.631897	0.632423
					10.9798	0.633985	0.631118	0.631894
					11.1042	0.633689	0.630856	0.631474
					11.2286	0.633353	0.630695	0.631074
					11.353	0.633016	0.630534	0.630675
					11.4774	0.63268	0.630372	0.630275
					11.6019	0.632585	0.629982	0.629591
					11.7263	0.632544	0.62954	0.628843
					11.8507	0.632502	0.629099	0.628096
					11.9751	0.632461	0.628657	0.627348
					12.0995	0.632295	0.628407	0.626524
					12.224	0.632098	0.628204	0.62568
					12.3484	0.631901	0.628002	0.624836
					12.4728	0.631704	0.627799	0.623992
					12.5972	0.631558	0.627542	0.623209
					12.7216	0.631426	0.62727	0.622441
					12.846	0.631294	0.626997	0.621674
					12.9704	0.631163	0.626725	0.620906
					13.0949	0.630858	0.626197	0.620013
					13.2193	0.6305	0.625589	0.619082
					13.3437	0.630141	0.624981	0.61815
					13.4681	0.629783	0.624373	0.617218
					13.5925	0.629499	0.624003	0.616405
					13.717	0.629241	0.623715	0.615633
					13.8414	0.628983	0.623428	0.614861
					13.9658	0.628725	0.623139	0.614089
					14.0902	0.628389	0.622742	0.61325
					14.2146	0.628022	0.622303	0.612385
					14.339	0.627655	0.621865	0.61152
					14.4634	0.627288	0.621426	0.610655
					14.5879	0.626878	0.621149	0.609695
					14.7123	0.626451	0.62094	0.608697
					14.8367	0.626023	0.62073	0.607698
					14.9611	0.625595	0.620521	0.606699
					15.0855	0.625341	0.620149	0.605634
					15.2099	0.625167	0.619704	0.604538
					15.3344	0.624993	0.619258	0.603443
					15.4588	0.624818	0.618813	0.602347
					15.5832	0.624477	0.618483	0.601413
					15.7076	0.624053	0.618212	0.60056
					15.832	0.623629	0.61794	0.599706
					15.9565	0.623206	0.617668	0.598853
					16.0809	0.622829	0.61704	0.59816
					16.2053	0.622477	0.61622	0.597556
					16.3297	0.622125	0.615399	0.59695
					16.4541	0.621773	0.614578	0.596345
					16.5785	0.621461	0.613918	0.595497
					16.703	0.621171	0.61335	0.594506
					16.8274	0.620882	0.612783	0.593515
					16.9518	0.620592	0.612216	0.592525
					17.0762	0.620426	0.611682	0.591565
					17.2006	0.620339	0.61117	0.590626
					17.325	0.620252	0.610657	0.589687
					17.4495	0.620165	0.610144	0.588748
					17.5739	0.620121	0.60951	0.587842
					17.6983	0.620107	0.608793	0.586959
					17.8227	0.620093	0.608076	0.586075
					17.9471	0.620079	0.607359	0.585192
					18.0715	0.620165	0.606772	0.584215
					18.196	0.620326	0.606283	0.583169
					18.3204	0.620487	0.605794	0.582122
					18.4448	0.620647	0.605305	0.581076
					18.5692	0.62077	0.604712	0.580073
					18.6936	0.620864	0.604035	0.579106
					18.818	0.620957	0.603358	0.578139
					18.9425	0.62105	0.602681	0.577172
					19.0669	0.621172	0.602222	0.576217
					19.1913	0.62132	0.601951	0.575272
					19.3157	0.621467	0.60168	0.574328
					19.4401	0.621614	0.601409	0.573383
					19.5645	0.621511	0.600966	0.572497
					19.689	0.621176	0.600363	0.571664
					19.8134	0.620841	0.59976	0.570831
					19.9378	0.620506	0.599158	0.569998
					20.0622	0.620379	0.598606	0.569385
					20.1866	0.620461	0.598105	0.568992
					20.311	0.620543	0.597604	0.5686
					20.4355	0.620625	0.597103	0.568207
					20.5599	0.620748	0.596608	0.567805
					20.6843	0.620913	0.59612	0.567393
					20.8087	0.621079	0.595631	0.566981
					20.9331	0.621245	0.595142	0.56657
					21.0575	0.621379	0.594602	0.566052
					21.182	0.621478	0.594001	0.565412
					21.3064	0.621576	0.5934	0.564772
					21.4308	0.621674	0.592799	0.564132
					21.5552	0.621742	0.592266	0.563442
					21.6796	0.621773	0.591819	0.562688
					21.8041	0.621803	0.591372	0.561935
					21.9285	0.621834	0.590926	0.561182
					22.0529	0.621922	0.59036	0.560562
					22.1773	0.622087	0.589633	0.560122
					22.3017	0.622252	0.588906	0.559683
					22.4261	0.622418	0.588179	0.559243
					22.5506	0.622557	0.587481	0.558719
					22.675	0.622659	0.586824	0.558069
					22.7994	0.62276	0.586167	0.557419
					22.9238	0.622861	0.58551	0.556769
					23.0482	0.622895	0.58489	0.556079
					23.1726	0.62282	0.584331	0.555325
					23.297	0.622745	0.583771	0.554571
					23.4215	0.62267	0.583211	0.553818
					23.5459	0.622596	0.582735	0.553161
					23.6703	0.622524	0.582403	0.552671
					23.7947	0.622452	0.582071	0.552181
					23.9191	0.62238	0.581739	0.55169
					24.0435	0.6224	0.581338	0.551188
					24.168	0.622591	0.580807	0.550663
					24.2924	0.622782	0.580277	0.550138
					24.4168	0.622973	0.579747	0.549612
					24.5412	0.623066	0.579223	0.549116
					24.6656	0.622959	0.578713	0.548677
					24.7901	0.622853	0.578202	0.548238
					24.9145	0.622746	0.577692	0.5478
					25.0389	0.622716	0.577163	0.547399
					25.1633	0.622858	0.576591	0.547081
					25.2877	0.622999	0.576018	0.546763
					25.4121	0.623141	0.575446	0.546446
					25.5365	0.623192	0.574991	0.546093
					25.661	0.623026	0.574819	0.545656
					25.7854	0.62286	0.574647	0.545219
					25.9098	0.622694	0.574475	0.544783
					26.0342	0.622586	0.57425	0.544212
					26.1586	0.622634	0.573884	0.543286
					26.283	0.622682	0.573519	0.54236
					26.4075	0.622729	0.573153	0.541434
					26.5319	0.622826	0.572728	0.540724
					26.6563	0.623065	0.572133	0.540642
					26.7807	0.623304	0.571538	0.540561
					26.9051	0.623543	0.570942	0.540479
					27.0296	0.623725	0.570338	0.540337
					27.154	0.623724	0.569705	0.539996
					27.2784	0.623722	0.569072	0.539656
					27.4028	0.62372	0.568439	0.539316
					27.5272	0.6237	0.567796	0.538973
					27.6516	0.623613	0.567119	0.538623
					27.7761	0.623526	0.566443	0.538272
					27.9005	0.623439	0.565766	0.537921
					28.0249	0.623369	0.565133	0.537528
					28.1493	0.623366	0.564675	0.53696
					28.2737	0.623363	0.564217	0.536393
					28.3981	0.62336	0.563759	0.535826
					28.5225	0.623326	0.563237	0.535258
					28.647	0.623153	0.562423	0.534692
					28.7714	0.62298	0.561608	0.534126
					28.8958	0.622807	0.560793	0.533559
					29.0202	0.622682	0.560058	0.533005
					29.1446	0.622811	0.559736	0.532514
					29.2691	0.62294	0.559413	0.532023
					29.3935	0.623069	0.55909	0.531532
					29.5179	0.623156	0.558714	0.530993
					29.6423	0.62299	0.558016	0.530169
					29.7667	0.622824	0.557319	0.529345
					29.8911	0.622659	0.556621	0.52852
					30.0156	0.622492	0.55595	0.527751
					30.14	0.622317	0.555464	0.527371
					30.2644	0.622143	0.554978	0.526991
					30.3888	0.621968	0.554491	0.526611
					30.5132	0.6218	0.553984	0.526215
					30.6376	0.621689	0.553303	0.525687
					30.762	0.621578	0.55262	0.525158
					30.8865	0.621467	0.551938	0.52463
					31.0109	0.621359	0.551282	0.524085
					31.1353	0.62128	0.5509	0.523374
					31.2597	0.6212	0.550518	0.522663
					31.3841	0.62112	0.550135	0.521951
					31.5085	0.621034	0.549747	0.521245
					31.633	0.620847	0.549276	0.520612
					31.7574	0.620661	0.548805	0.519979
					31.8818	0.620474	0.548334	0.519346
					32.0062	0.620271	0.547859	0.518716
					32.1306	0.619738	0.547298	0.518142
					32.255	0.619204	0.546737	0.517568
					32.3795	0.618671	0.546177	0.516995
					32.5039	0.618154	0.545638	0.51642
					32.6283	0.618139	0.545785	0.515812
					32.7527	0.618125	0.545931	0.515204
					32.8771	0.618111	0.546078	0.514595
					33.0016	0.618095	0.546221	0.513991
					33.126	0.617933	0.546095	0.513676
					33.2504	0.617771	0.54597	0.513361
					33.3748	0.61761	0.545844	0.513046
					33.4992	0.617448	0.545718	0.512731
					33.6236	0.617406	0.545215	0.512548
					33.7481	0.617365	0.544708	0.512365
					33.8725	0.617324	0.544202	0.512183
					33.9969	0.617283	0.543696	0.512
					34.1213	0.616993	0.543267	0.511696
					34.2457	0.616696	0.54284	0.511388
					34.3701	0.616399	0.542413	0.51108
					34.4946	0.616102	0.541986	0.510772
					34.619	0.616029	0.541641	0.510396
					34.7434	0.615966	0.541301	0.510017
					34.8678	0.615902	0.54096	0.509638
					34.9922	0.615839	0.54062	0.509259
					35.1166	0.615754	0.540505	0.509118
					35.2411	0.615668	0.540406	0.508993
					35.3655	0.615582	0.540307	0.508868
					35.4899	0.615496	0.540207	0.508743
					35.6143	0.61543	0.540006	0.508885
					35.7387	0.615367	0.539794	0.509051
					35.8631	0.615303	0.539583	0.509217
					35.9876	0.61524	0.539372	0.509383
					36.112	0.615548	0.539167	0.509436
					36.2364	0.615898	0.538963	0.509476
					36.3608	0.616248	0.538759	0.509515
					36.4852	0.616598	0.538554	0.509555
					36.6096	0.616772	0.538164	0.509431
					36.7341	0.616923	0.537748	0.509286
					36.8585	0.617073	0.537332	0.50914
					36.9829	0.617223	0.536917	0.508994
					37.1073	0.617279	0.53647	0.508857
					37.2317	0.617321	0.536019	0.508722
					37.3561	0.617362	0.535569	0.508587
					37.4806	0.617403	0.535118	0.508451
					37.605	0.617402	0.53467	0.508532
					37.7294	0.617393	0.534223	0.508653
					37.8538	0.617383	0.533776	0.508774
					37.9782	0.617374	0.533328	0.508895
					38.1026	0.617258	0.532873	0.509052
					38.2271	0.617119	0.532416	0.509217
					38.3515	0.61698	0.531958	0.509383
					38.4759	0.616841	0.531501	0.509548
					38.6003	0.616632	0.531309	0.509466
					38.7247	0.616406	0.531181	0.509325
					38.8491	0.61618	0.531052	0.509183
					38.9736	0.615954	0.530924	0.509042
					39.098	0.61577	0.530532	0.509081
					39.2224	0.615598	0.530068	0.50917
					39.3468	0.615425	0.529604	0.509259
					39.4712	0.615252	0.529141	0.509347
					39.5956	0.614952	0.528824	0.509689
					39.7201	0.614612	0.528551	0.510108
					39.8445	0.614272	0.528279	0.510526
					39.9689	0.613932	0.528006	0.510945
					40.0933	0.613644	0.527722	0.511107
					40.2177	0.613372	0.527434	0.511182
					40.3421	0.613101	0.527146	0.511258
					40.4666	0.61283	0.526859	0.511333
					40.591	0.612814	0.526667	0.511355
					40.7154	0.612892	0.52651	0.511356
					40.8398	0.61297	0.526354	0.511358
					40.9642	0.613048	0.526198	0.511359
					41.0887	0.61348	0.526061	0.511333
					41.2131	0.614056	0.525932	0.511295
					41.3375	0.614631	0.525803	0.511257
					41.4619	0.615206	0.525675	0.511219
					41.5863	0.615456	0.525459	0.511333
					41.7107	0.615562	0.525203	0.511513
					41.8351	0.615667	0.524948	0.511694
					41.9596	0.615772	0.524693	0.511874
					42.084	0.615738	0.524378	0.51183
					42.2084	0.615636	0.524035	0.511676
					42.3328	0.615533	0.523691	0.511522
					42.4572	0.615431	0.523347	0.511368
					42.5817	0.61539	0.523432	0.511453
					42.7061	0.615381	0.523743	0.511664
					42.8305	0.615372	0.524053	0.511874
					42.9549	0.615364	0.524364	0.512084
					43.0793	0.61526	0.524465	0.512184
					43.2037	0.615101	0.524447	0.51222
					43.3282	0.614943	0.524429	0.512257
					43.4526	0.614784	0.52441	0.512293
					43.577	0.614613	0.52447	0.512354
					43.7014	0.614433	0.524579	0.51243
					43.8258	0.614254	0.524688	0.512505
					43.9502	0.614075	0.524797	0.512581
					44.0746	0.614013	0.524861	0.512642
					44.1991	0.614031	0.524894	0.512693
					44.3235	0.614048	0.524926	0.512745
					44.4479	0.614066	0.524959	0.512796
					44.5723	0.614123	0.524977	0.512779
					44.6967	0.614207	0.524984	0.512713
					44.8212	0.614292	0.524991	0.512647
					44.9456	0.614376	0.524998	0.51258
					45.07	0.614578	0.524746	0.512446
					45.1944	0.614873	0.52429	0.512258
					45.3188	0.615167	0.523835	0.51207
					45.4432	0.615462	0.523379	0.511883
					45.5677	0.615625	0.522984	0.511635
					45.6921	0.615679	0.522641	0.511336
					45.8165	0.615732	0.522297	0.511037
					45.9409	0.615785	0.521954	0.510738
					46.0653	0.615805	0.521695	0.510761
					46.1897	0.615794	0.521513	0.511077
					46.3141	0.615784	0.52133	0.511393
					46.4386	0.615773	0.521148	0.511709
					46.563	0.615811	0.521011	0.511819
					46.6874	0.615896	0.520918	0.511726
					46.8118	0.615982	0.520824	0.511632
					46.9362	0.616067	0.520731	0.511539
					47.0607	0.616114	0.520514	0.511478
					47.1851	0.61612	0.520165	0.511452
					47.3095	0.616126	0.519817	0.511425
					47.4339	0.616131	0.519469	0.511399
					47.5583	0.616155	0.51923	0.51136
					47.6827	0.6162	0.519115	0.511308
					47.8072	0.616244	0.519001	0.511257
					47.9316	0.616288	0.518886	0.511205
					48.056	0.616361	0.518682	0.51116
					48.1804	0.61647	0.518366	0.511123
					48.3048	0.616578	0.51805	0.511087
					48.4292	0.616687	0.517734	0.51105
					48.5537	0.616865	0.517483	0.511175
					48.6781	0.617136	0.517319	0.511514
					48.8025	0.617407	0.517155	0.511854
					48.9269	0.617678	0.516991	0.512193
					49.0513	0.6179	0.516725	0.512427
					49.1757	0.618053	0.516312	0.512509
					49.3002	0.618206	0.5159	0.512591
					49.4246	0.618358	0.515487	0.512674
					49.549	0.6185	0.515197	0.512589
					49.6734	0.618626	0.515095	0.512246
					49.7978	0.618751	0.514993	0.511903
					49.9222	0.618877	0.514892	0.51156
					50.0467	0.619	0.514764	0.511375
					50.1711	0.619118	0.514592	0.511456
					50.2955	0.619236	0.51442	0.511536
					50.4199	0.619354	0.514248	0.511617
					50.5443	0.619495	0.514232	0.511701
					50.6687	0.619676	0.5145	0.511793
					50.7932	0.619857	0.514768	0.511885
					50.9176	0.620039	0.515036	0.511977
					51.042	0.620205	0.515223	0.512051
					51.1664	0.62034	0.515249	0.512092
					51.2908	0.620476	0.515276	0.512133
					51.4152	0.620611	0.515302	0.512174
					51.5397	0.620794	0.515376	0.512294
					51.6641	0.621077	0.515552	0.512584
					51.7885	0.621361	0.515729	0.512874
					51.9129	0.621645	0.515905	0.513164
					52.0373	0.621836	0.516096	0.513417
					52.1617	0.621812	0.516321	0.513584
					52.2862	0.621787	0.516547	0.513752
					52.4106	0.621763	0.516772	0.513919
					52.535	0.621658	0.517079	0.513961
					52.6594	0.621346	0.517594	0.513682
					52.7838	0.621034	0.518109	0.513402
					52.9083	0.620722	0.518624	0.513123
					53.0327	0.620416	0.519078	0.512949
					53.1571	0.620128	0.519361	0.513073
					53.2815	0.61984	0.519643	0.513198
					53.4059	0.619552	0.519925	0.513322
					53.5303	0.619237	0.520198	0.513388
					53.6547	0.618841	0.520444	0.51327
					53.7792	0.618444	0.52069	0.513153
					53.9036	0.618047	0.520936	0.513035
					54.028	0.617776	0.521238	0.512924
					54.1524	0.617939	0.521737	0.512838
					54.2768	0.618103	0.522236	0.512751
					54.4012	0.618266	0.522735	0.512664
					54.5257	0.618309	0.523215	0.512584
					54.6501	0.61788	0.523624	0.512528
					54.7745	0.617452	0.524032	0.512472
					54.8989	0.617023	0.52444	0.512415
					55.0233	0.616609	0.524843	0.512368
					55.1478	0.616258	0.525219	0.512358
					55.2722	0.615907	0.525595	0.512348
					55.3966	0.615556	0.525971	0.512338
					55.521	0.615245	0.52628	0.512346
					55.6454	0.615127	0.526258	0.512439
					55.7698	0.615009	0.526236	0.512532
					55.8942	0.614891	0.526214	0.512624
					56.0187	0.614734	0.526256	0.512721
					56.1431	0.614351	0.526665	0.512838
					56.2675	0.613968	0.527074	0.512956
					56.3919	0.613585	0.527482	0.513073
					56.5163	0.613225	0.527904	0.51324
					56.6407	0.613021	0.528414	0.51374
					56.7652	0.612816	0.528924	0.51424
					56.8896	0.612612	0.529434	0.51474
					57.014	0.612411	0.529924	0.515213
					57.1384	0.612229	0.530253	0.515468
					57.2628	0.612047	0.530581	0.515722
					57.3873	0.611865	0.53091	0.515977
					57.5117	0.611666	0.531229	0.51623
					57.6361	0.611305	0.531455	0.516466
					57.7605	0.610945	0.531682	0.516703
					57.8849	0.610584	0.531908	0.516939
					58.0093	0.610251	0.532149	0.517202
					58.1337	0.610283	0.532576	0.517796
					58.2582	0.610315	0.533004	0.518389
					58.3826	0.610347	0.533431	0.518983
					58.507	0.610318	0.533834	0.519592
					58.6314	0.609236	0.533809	0.520456
					58.7558	0.608153	0.533784	0.521321
					58.8802	0.607071	0.533758	0.522185
					59.0047	0.606042	0.533757	0.523035
					59.1291	0.606442	0.534392	0.523485
					59.2535	0.606843	0.535026	0.523936
					59.3779	0.607244	0.535661	0.524387
					59.5023	0.607648	0.536293	0.524836
					59.6268	0.608241	0.5368	0.525208
					59.7512	0.608834	0.537306	0.52558
					59.8756	0.609427	0.537813	0.525952
					60	0.61002	0.538319	0.526324

## Sheet: H Statistics
Figure 4H - Statistical analysis
Kolmogorov-Smirnov Tests at 40 mins
S2/3B vs. +1				PSB	+1	-1
p	0.011		N	399	397	426
D	0.1143
S2/3B vs. -1
p	0.0009
D	0.1365
+1 vs. -1
p	0.5784
D	0.05435

## Sheet: I
Figure 4I	Interface orientations at 40mins for S1/2B, +1 and -1 interfaces
S1/2B	+1	-1
85.4581	51.3465	69.7622
67.4932	78.8788	87.3057
73.2695	49.8554	84.5641
61.7458	19.317	47.0694
75.4528	66.4847	63.6396
76.749	59.6385	54.4041
73.0898	57.5607	62.3772
34.9532	85.5158	30.7667
47.6946	22.5067	66.2682
88.2956	64.8928	56.8567
49.0155	30.7136	68.0464
61.7305	24.0647	51.9835
68.8708	9.03067	50.4356
79.8741	80.5396	38.4917
89.0422	76.8286	64.1986
51.7802	77.4399	32.4395
82.4618	43.6077	60.7407
57.0493	21.1278	42.3058
78.3449	42.3051	59.7891
87.3057	61.7303	66.8254
23.8707	60.2232	54.8194
61.7305	41.3179	59.583
55.9915	47.6944	63.5562
47.1497	78.5596	59.0043
48.0164	87.3055	10.6043
80.9653	54.4833	73.8099
53.6162	46.5949	56.3468
67.8656	35.3135	27.4792
74.777	45.4918	45.7194
55.4595	87.3057	87.3056
75.7135	34.711	73.1577
38.4916	51.7681	51.5518
80.6733	75.9441	20.2198
77.0521	70.8928	17.6288
72.7111	70.0745	67.8656
38.7216	54.6863	13.6484
69.8606	44.968	88.8803
36.3842	62.9496	49.2854
56.5701	83.5321	64.472
50.4205	60.7407	40.3967
12.0492	39.92	61.7305
78.1435	82.4066	74.2593
50.4358	55.8243	61.1588
64.0838	73.2082	60.7409
86.6854	60.9336	32.1302
85.9418	71.1164	58.2511
68.8719	71.012	87.3057
85.4969	43.8969	87.3057
78.5597	57.4009	84.2673
85.0151	38.9393	89.9083
51.7798	58.8073	42.3051
47.5002	65.9353	72.9475
89.118	61.2762	60.7408
61.7308	56.2252	29.5014
85.1619	52.7134	75.4171
52.8066	42.4386	2.6955
85.6271	8.79962	47.6943
76.6283	84.0681	76.7447
50.4096	24.6959	15.7407
79.4013	35.2713	77.5703
76.1648	86.5808	15.7408
38.0626	40.6259	85.5662
73.817	40.627	43.2296
62.6384	88.538	30.9381
81.6017	75.938	75.2795
56.8044	81.3592	51.9371
60.1638	25.4104	60.3942
71.0381	56.1513	64.8968
53.7717	83.2898	60.6833
72.5712	85.2826	86.5197
70.103	34.9165	54.0581
73.0933	59.0618	29.4692
58.5549	57.1382	68.9095
69.929	52.782	34.1777
76.4647	4.37293	29.3171
73.1224	66.4756	88.1719
86.8459	39.6393	29.3897
59.062	74.0497	4.37293
46.7426	81.6819	51.937
17.4284	85.627	84.5394
75.938	49.3732	52.5527
71.2571	85.6271	80.1632
83.0628	52.8918	64.1697
68.8445	66.3637	58.1018
52.8066	63.8257	36.1132
35.3362	63.409	24.929
71.5907	42.0206	69.1228
37.2607	87.6068	54.9004
50.7051	61.4677	40.6267
74.317	38.063	63.9074
55.8927	69.6817	38.8372
72.3286	63.6974	85.6271
23.6995	49.6666	41.7061
40.6271	86.7782	29.3172
56.8043	37.3424	48.292
75.9379	4.95065	61.1831
83.1375	38.063	88.0466
38.0625	73.4828	44.6091
65.6441	75.938	54.2985
30.9377	49.3729	21.4934
68.4511	59.8104	32.1744
75.938	71.0062	60.6832
69.9292	75.9377	69.9288
57.503	28.3354	49.3732
52.5528	70.3719	9.25406
77.9834	40.6268	85.6271
57.8256	51.9371	62.6134
71.1743	48.071	44.5276
48.0131	42.602	75.8447
57.5031	65.6329	83.2691
72.2346	20.644	53.8575
80.8635	51.3479	74.8761
45.8215	21.4757	80.8025
75.5039	72.5716	63.4091
67.1924	60.8521	77.497
75.938	81.498	85.6271
52.1656	74.3176	50.5533
60.1637	56.759	17.8686
49.3729	40.6271	30.1357
44.9162	86.5364	24.2375
31.881	6.41144	89.8635
87.9177	66.727	71.0289
72.1213	85.6271	81.813
82.9482	62.0973	78.2747
40.0688	44.4677	54.5673
76.496	68.8797	48.7572
85.069	25.5346	57.5029
68.512	60.6251	54.5673
48.1992	58.402	24.8533
82.7867	30.061	53.4586
86.0503	28.7591	7.79864
51.379	51.7209	75.0455
40.0687	69.4763	72.8686
83.2416	89.0142	49.931
63.7512	49.5311	85.069
76.4959	61.2409	85.8731
54.1053	27.2649	44.9681
79.2888	85.069	31.496
77.4183	81.4352	41.9167
75.4909	55.3713	77.1864
23.3664	82.0372	65.1862
69.0245	40.0691	25.2723
28.4294	35.6705	59.6197
47.8343	78.1483	66.3204
86.5041	75.2866	8.37836
14.0933	87.8731	21.1829
70.8532	85.0686	11.0035
81.9364	61.2408	86.1848
49.931	52.9437	65.1862
64.844	71.5733	31.4959
68.366	72.551	59.0947
72.8043	88.5908	82.2066
69.7298	41.0921	46.4094
59.0933	41.504	57.8382
60.7645	70.4869	80.8947
25.4236	13.7377	55.324
48.1992	89.4033	76.496
84.246	71.5733	8.02508
34.3585	13.504	81.6903
87.6778	61.4447	69.1235
43.8156	83.2716	88.7604
45.5322	76.9388	64.513
82.4022	59.6875	75.8374
78.5492	55.8306	51.7584
87.4994	75.7338	10.3243
88.0891	76.5136	11.5734
50.0694	50.9845	85.069
80.9496	81.8192	80.8948
76.7392	25.2799	71.5734
76.4155	82.9393	19.1152
57.9411	85.3483	74.5546
64.7202	89.0797	27.7645
88.2839	81.5491	33.1021
86.5217	52.5643	79.9167
30.636	52.5919	41.047
89.3143	67.2565	84.7323
55.5579	52.141	23.9292
79.4423	75.0437	86.5217
75.2117	42.7677	57.7108
87.1382	40.3525	77.5488
41.5217	58.3442	25.6447
89.8881	48.4766	49.8473
43.9045	63.41	80.9495
74.6329	34.2466	28.0456
55.3602	75.0435	46.2851
71.267	55.5579	72.1402
44.8881	64.6986	57.9405
82.4977	63.558	41.5219
56.7767	67.3032	83.7953
32.5491	57.467	74.4527
41.5216	30.9528	49.6517
79.2159	54.5162	3.47841
54.4875	69.1739	47.2849
80.994	80.1815	82.4933
59.7888	51.8264	0.112
70.4893	75.0436	80.5126
34.9826	3.47841	19.001
39.0158	70.0447	48.4784
86.126	69.9262	6.38736
79.5405	7.71469	76.688
48.4784	80.9495	73.9417
50.0523	18.3227	86.5216
86.3534	45.8107	27.9223
37.4361	48.4784	65.4693
57.6124	88.2839	55.558
77.5488	52.2604	24.1676
62.0781	77.5331	51.2048
62.5146	74.8323	30.4743
80.0018	42.3629	75.6814
21.7227	48.9077	4.65183
45.9203	86.5216	78.3914
64.7203	54.7621	67.4488
20.9651	62.8923	18.9006
73.6377	35.3182	87.4694
17.8922	68.8882	27.8503
73.6467	69.9262	50.2681
41.5216	63.9017	77.1614
74.7532	72.9225	60.4077
69.4189	48.2314	0.465576
45.9203	54.0504	20.9651
74.7281	87.6448	66.1984
83.1735	42.1382	34.4419
69.516	66.1942	78.7348
69.4188	43.1819	60.4921
80.9495	86.5216	81.9437
54.8187	45.1119	71.677
54.5162	72.6239	70.6447
80.3514	59.1717	74.0384
83.3978	48.4779	88.1638
52.0547	76.9164	38.696
81.6225	63.222	89.957
86.5216	65.677	47.1765
56.6084	42.1382	77.3593
37.1682	70.983	55.5579
59.7885	72.4126	47.0491
78.3914	86.3126	89.1846
45.3357	60.761	3.47881
35.1813	72.202	56.7767
28.1291	65.0768	67.709
87.457	65.6332	12.2246
64.3358	7.86102	62.5591
70.8594	80.0286	32.0889
21.6536	47.149	34.0902
51.488	87.5712	72.1078
44.0567	87.326	37.7902
84.5995	67.3227	78.7351
38.5113	47.9118	68.0867
81.6797	51.4875	34.3966
55.2112	64.9837	55.2285
25.7876	65.0769	86.5216
83.5095	70.5137	79.2411
38.5107	6.49054	75.3268
87.3978	60.5276	83.5119
40.1783	35.1454	86.7824
76.3869	55.5735	12.4971
40.3018	71.2471	69.4756
83.9596	49.5132	69.2841
79.3854	60.3139	38.512
75.3817	66.6905	83.5118
83.5119	87.457	71.713
30.9326	5.15585	83.4937
54.0907	72.0442	78.0531
79.9357	47.5514	83.5095
59.4578	41.3634	75.1174
83.5122	78.0532	78.0539
54.4572	60.9503	53.0861
59.6182	8.60925	72.8587
72.4126	56.1244	20.0769
51.488	1.64218	47.9742
81.8272	42.5155	34.6298
82.8611	48.2942	37.0798
31.2633	83.5119	73.7372
82.4517	72.2949	83.5119
59.6186	41.1145	9.95642
80.964	55.1327	84.0622
78.3174	44.3632	87.8725
63.8273	87.7798	51.4881
72.5312	56.6826	38.4935
38.512	53.4631	38.5119
80.5427	79.6979	76.8021
51.4893	69.4756	8.25571
63.1354	52.852	68.4789
81.8462	27.2027	88.9238
83.5119	75.8877	59.5493
57.8282	18.6596	54.6027
67.5665	58.9447	5.77649
61.793	41.0804	63.5288
80.2991	78.0532	79.3853
41.6917	83.5119	85.7039
72.5578	71.2471	48.6874
44.6274	51.4881	57.3655
60.313	16.7104	75.3816
67.8776	79.0854	43.3578
43.5544	43.2755	83.5119
72.7275	29.2658	49.8034
44.3679	68.7297	78.0532
42.0258	63.1355	61.1768
44.3632	64.4827	53.4431
83.9594	38.5118	38.511
38.5119	68.1874	34.7805
84.4374	53.7668	6.48834
51.4881	68.3879	76.8959
54.4572	28.2896	60.4607
42.4487	65.5243	33.7482
38.5117	45.8642	78.3174
51.488	42.0258	75.3817
86.1123	59.0679	76.505
89.9684	59.4364	9.9563
89.3881	68.4156	70.6218
49.8117	64.6706	2.48456
39.1106	68.4846	89.5209
85.1429	81.7733	36.634
54.5612	20.2933	60.2343
74.0209	59.3572	65.0772
75.7744	70.6795	66.8214
36.7729	85.3979	27.202
88.7644	34.9249	40.8025
55.6977	63.4342	19.2593
44.3265	8.94006	34.9355
82.4893	73.833	40.1783
75.6725	76.7459	76.3869
61.4907	79.9256	69.923
58.508	63.936	82.1654
86.9167	29.23	16.7107
69.4342	84.2798	58.4411
84.7768	34.9257	67.5664
43.2228	60.2719	40.1782
88.7644	43.764	66.4091
46.2364	26.064	14.8825
72.819	46.2355	86.1852
39.6788	19.0876	76.7832
43.7638	88.6718	67.7267
46.2356	52.5758	80.9307
47.5786	86.6434	43.633
83.5699	32.4545	88.7643
64.6705	75.7697	69.4342
61.0059	65.329	16.3367
54.65	58.5079	52.5758
62.1995	60.2718	34.9226
86.0413	47.5785	2.87192
70.198	28.3689	79.6435
85.2266	68.037	51.4299
73.3689	64.6705	80.9111
55.0742	37.4896	39.0008
62.1991	51.8945	19.6705
66.4603	83.9205	53.0783
88.7644	44.2261	88.7644
88.7644	72.8018	35.9309
68.7813	63.0545	56.6718
88.4428	65.8893	71.9455
70.33	80.4513	43.7644
60.2719	69.4744	1.2356
38.8042	87.4221	41.4271
42.4914	83.1053	50.3212
88.6331	64.6707	43.7643
70.3811	65.9308	68.6157
66.7917	46.2359	43.765
56.5687	72.819	74.1436
36.9754	75.0466	35.9307
75.5933	53.2166	74.5364
64.6705	19.1143	46.4905
50.3212	21.1446	56.8554
59.7098	81.1698	88.5093
68.0372	46.2356	38.1054
86.9171	83.3242	72.8006
88.7644	37.4244	85.8731
46.2368	40.8536	53.5879
67.91	20.7722	25.4147
49.6019	41.8369	53.8889
71.0197	61.1184	68.5417
72.8007	73.3569	83.6408
70.3309	34.9253	78.8986
46.2355	60.1539	59.0195
84.5258	80.255	46.2351
65.1217	65.3692	62.625
50.7496	17.1994	12.0199
57.5457	70.3295	61.4907
66.7899	73.4167	70.9124
45.0898	66.3071	34.9255
88.7644	52.1302	70.3302
60.4637	66.5981	84.7363
27.8008	50.6343	78.3605
77.9111	39.6786	60.4635
43.7645	75.9802	14.628
78.241	43.7647	14.628
46.2344	70.3378	9.71844
73.9541	10.0744	87.9651
85.4752	30.1448	85.5845
50.9993	55.6979	19.6705
78.9308	67.737	54.2559
32.1994	63.7475	3.21054
81.5756	1.23563	71.6617
48.3998	27.8008	19.2554
43.7639	55.8731	69.4341
49.3021	35.6341	81.2277
75.9802	34.9255	66.9631
82.2651	88.0907	58.7644
71.0106	50.6344	15.6229
50.0496	88.7644	47.117
67.6832	88.7668	14.2256
63.0544	43.7644	74.1435
44.2261	17.199	35.6159
	19.6698	34.3016
	43.2228	81.3331
	82.4895	40.2711
	46.055	57.5456
	36.111	68.7813
	52.1304	52.5759
	24.0692	0.40094
	26.5818	48.6916
	76.2357	46.2357
	78.5204	47.2326
	45.1547	3.00082
	71.6617	46.2356
	37.263	57.8006
	46.2356	34.9256
	52.9268	64.1973
	72.8005	24.5337
	85.8288	62.7399
		72.08
		46.9443
		60.9792
		79.5533
		50.6342
		85.8537
		55.0742
		55.0743
		51.9462

## Sheet: J
Figure 4J	Interface orientations at 40mins for S2/3B, +1 and -1 interfaces
S2/3B	+1	-1
89.2261	71.3604	51.3466
43.4073	83.3052	60.7407
66.4847	72.4194	60.7409
50.8366	72.3177	76.7493
87.8218	76.7489	41.5788
49.1631	70.3783	87.3796
47.6942	89.803	80.0525
85.5158	56.8566	76.4341
87.3069	76.7488	64.3934
61.3447	63.0012	74.2588
62.8616	19.1066	60.7407
40.57	82.3895	64.8928
65.5043	60.7406	29.2594
21.1278	44.968	77.4399
79.2291	26.0455	46.7044
42.3051	86.5804	67.1342
70.8929	47.6943	89.042
61.7303	70.203	43.6077
56.1051	32.8433	75.4529
68.8703	47.6943	21.5801
47.6942	84.9684	78.5596
87.3055	40.1985	54.4833
37.5421	69.427	50.4206
77.7629	47.6937	44.8505
87.3057	85.0997	87.3057
51.7681	47.6931	66.1292
68.1267	84.2929	46.5949
75.9441	84.1005	81.6379
21.1294	49.9725	74.7768
70.8928	17.6288	66.9292
70.0745	64.4721	72.7112
54.6863	69.142	12.049
30.9954	85.7782	24.9516
88.458	42.4999	79.1753
79.3164	25.4453	78.3449
66.1658	77.9166	56.8799
39.92	58.3138	62.9495
82.4066	53.8099	1.29669
73.2082	68.8708	68.7318
60.9336	0.241394	51.768
67.6774	33.224	79.7111
80.0997	67.8824	50.4358
39.3972	86.7785	78.2154
79.1985	85.6271	55.8244
87.3054	85.2104	72.3743
69.2223	88.772	64.0838
89.9483	50.1268	71.3764
50.8745	50.0895	38.9393
80.8728	89.3093	2.50012
21.1298	75.938	57.4009
86.7062	85.4002	67.3224
84.0681	72.5715	58.8073
56.4979	55.6221	61.2762
74.3172	64.5135	56.2251
86.5808	77.9834	36.3843
40.6259	85.6271	42.4385
88.538	22.1924	56.5724
75.938	78.7843	79.9676
81.3592	40.6271	38.063
84.9106	85.6271	73.8168
54.2983	60.6827	88.1165
83.3365	43.6399	76.986
80.0995	89.8352	43.2574
74.1034	70.5341	50.0895
37.4473	62.6634	81.6017
67.1922	85.6998	62.6384
45.2874	69.6817	56.759
74.0497	54.7288	71.0381
81.8441	62.3674	53.9468
22.8067	38.063	69.929
39.1196	81.7391	81.498
81.6819	61.1833	40.6265
14.0627	10.3706	85.2827
85.627	23.552	63.8257
51.9369	72.7285	6.60785
49.3732	85.6271	75.573
85.6271	60.2585	56.1513
42.0206	38.0629	83.8913
87.6068	77.497	57.1381
61.4677	73.3353	29.3172
38.063	33.5021	64.6283
69.6817	73.6978	59.062
63.6974	52.2192	69.6818
49.6666	60.0578	20.0708
49.3729	56.2693	75.4483
55.8559	80.0278	50.6748
86.7782	79.4414	69.6818
38.063	53.187	55.7131
73.4828	72.8228	72.3285
75.938	79.1179	21.4481
65.571	78.2747	40.6271
75.9377	68.1976	75.938
75.938	4.37174	79.5545
67.1919	23.5244	49.3727
49.3729	65.4329	49.3728
37.6835	89.4412	85.6271
75.9379	4.3728	58.5839
48.3231	6.11841	83.1377
55.7132	55.7131	62.2989
89.515	21.0722	70.1659
49.3728	75.938	40.6268
75.5198	44.0607	20.8282
50.0895	65.8282	69.6816
69.9287	73.4751	33.502
47.0823	85.069	76.8472
86.5364	1.70154	52.6032
84.9368	53.4615	46.8281
87.4805	5.37415	45.7966
26.5905	60.5506	37.0508
70.1658	88.1631	51.3825
89.8352	49.931	0.025879
34.287	76.1191	28.5323
4.37293	65.1039	78.0324
73.3354	63.2675	51.1186
66.7136	51.7209	66.727
46.4091	73.4769	78.7843
83.1627	24.814	60.6104
79.1045	70.7853	61.3491
58.8458	55.6419	58.119
41.5011	72.0973	85.6271
71.033	72.075	72.5713
50.6887	85.7687	71.5908
34.3583	20.1435	49.3729
64.513	3.56766	75.938
71.3016	31.0497	44.9163
49.5311	26.0328	71.5733
4.93115	73.4097	46.6509
58.9034	55.9121	85.0687
59.9243	4.93097	13.5026
61.2407	70.1376	45.5323
80.6704	70.9685	44.4678
75.2866	76.3231	89.0142
73.1296	31.9389	69.1237
78.9857	57.056	40.0689
52.9437	38.0888	85.4685
71.5733	49.9313	30.606
3.59882	52.2216	70.3638
72.551	88.0819	85.9584
46.7509	57.9403	67.8589
74.9478	77.906	12.245
88.5908	43.1639	62.2354
67.3687	86.5216	68.366
72.5508	29.5538	59.3934
76.496	88.3693	73.4097
78.3593	69.3458	85.0687
88.0882	50.2678	55.1253
83.2716	59.0176	76.4959
58.504	53.5805	81.224
76.9388	69.2401	16.4396
54.3297	57.7718	79.807
59.6875	86.5216	74.5545
55.8306	59.7882	78.1577
68.0867	47.8618	25.1016
63.7333	89.0797	85.069
82.9393	23.9291	68.88
83.4275	78.3544	62.0258
82.7078	34.1356	4.93097
83.3328	65.5812	49.931
80.7858	32.7755	40.069
52.141	63.2751	77.5769
79.9397	45.098	23.3662
75.0437	45.0101	47.0502
42.7677	79.812	61.4656
62.5591	39.2323	49.931
78.3921	59.7888	81.4352
77.8361	84.3162	41.8008
63.41	6.30396	4.93213
19.7202	72.8947	64.0422
79.4423	39.231	75.0435
62.0488	74.8622	88.8116
48.6466	48.4768	30.6361
74.4528	63.7336	50.1148
63.558	89.9897	49.7975
67.3032	73.5933	80.18
20.9651	32.0588	3.47827
79.6104	72.2843	82.5243
68.7034	57.9408	89.3142
54.5162	36.1657	41.5216
69.1739	64.7203	27.9225
0.92038	81.3271	85.3483
86.5216	48.4784	52.5918
80.1815	30.5181	20.2711
34.8118	51.5723	64.9697
49.9859	74.6253	89.9899
82.6941	37.9453	68.0862
66.1985	76.7391	36.758
68.087	31.7792	67.6121
49.1163	82.6939	55.558
88.2839	67.3316	77.5329
37.1686	68.0867	64.4238
71.5901	80.6656	23.0866
14.9568	83.6959	58.026
64.0422	73.3707	57.2728
64.7198	16.5046	44.0795
41.5216	58.6243	71.2662
66.9134	72.4409	39.8627
39.0161	33.8548	71.5902
65.4841	50.524	39.0152
69.3458	77.8856	79.5405
62.8923	52.8316	78.927
82.5243	51.6582	70.5762
45.4941	65.7961	48.4778
72.9225	44.9021	70.6448
57.2727	48.7748	48.9076
80.6155	63.222	7.71469
85.8836	79.2973	58.8031
48.4781	41.521	44.3929
76.6558	58.9687	10.1884
37.4749	85.48	75.0434
87.6448	76.9741	46.9618
37.7075	14.0472	66.9134
55.8308	14.9564	22.496
86.5216	72.2021	79.2973
62.9487	65.0769	85.3484
76.6174	39.9439	54.7621
88.9044	87.9575	74.8322
44.9021	78.0532	39.9476
81.6777	69.923	75.0434
48.4779	55.4395	42.3631
76.9164	85.9489	35.3181
85.1244	25.6671	70.6448
58.4951	62.631	41.6894
70.983	45.637	83.3537
60.761	82.9863	24.6396
72.202	38.5119	66.4278
70.9279	85.1485	3.47841
65.0768	45.7774	80.9496
65.6332	79.1131	36.207
52.5481	31.9919	43.3115
83.5119	42.5156	72.624
87.326	85.3596	83.6126
51.488	63.9196	44.7015
85.7039	27.2017	54.0504
75.3483	29.9811	63.6024
67.3227	56.2518	59.1718
64.9837	46.642	66.0708
65.0769	65.0769	86.5216
70.5137	80.543	51.9105
57.1057	72.2017	50.3876
55.5735	79.5607	21.0887
71.2471	43.5186	35.9496
47.9751	30.5422	68.4615
49.5132	27.5255	85.1783
60.3139	67.5666	88.3558
66.6905	34.1132	86.1833
51.4887	70.983	40.3595
69.9233	70.7782	86.3126
80.4178	83.5118	29.3231
34.1134	35.3322	51.4879
52.5482	7.82037	51.4875
83.5119	70.5173	24.9235
81.3909	88.844	45.8574
78.0532	25.7875	86.7445
82.9556	41.6917	60.7343
72.5257	83.9593	38.5119
45.1478	51.4881	65.0769
63.8998	57.2532	78.9279
24.9235	78.0532	28.2896
76.1118	56.0021	38.5131
83.5119	68.7681	88.3578
83.5118	78.0532	54.0907
82.9924	83.5119	80.0286
77.3652	89.1111	42.5155
48.5198	42.5974	41.1145
84.512	72.9895	79.9356
59.8825	56.9468	60.2343
40.4179	85.1782	57.3118
55.3022	66.4832	72.0441
78.0532	45.148	35.1455
52.0477	82.0431	86.4227
83.5119	46.386	60.9503
51.4883	40.1776	47.5513
24.9234	49.8215	39.5169
86.3126	75.9173	41.2841
87.0259	54.0906	52.5482
71.8646	56.9468	55.8659
24.9233	78.0544	68.4156
65.0768	42.326	83.5119
55.3666	71.6233	47.7229
84.7987	57.1987	79.1135
49.822	53.2554	86.9801
55.8868	59.2534	56.9284
56.9464	69.1624	69.4756
64.8806	73.5038	65.9585
66.0226	45.7775	79.5666
88.723	88.8264	29.0497
43.7063	85.3294	76.275
53.3087	38.4704	44.3632
77.3964	43.7644	11.9285
33.7482	69.8648	55.3021
75.3817	50.0497	58.5834
80.6342	71.8766	23.257
60.2717	88.7644	52.8521
66.2187	20.5659	43.2755
69.4339	77.4545	39.9743
88.7644	69.6088	47.9742
89.4268	72.3751	72.8923
83.1053	1.2356	19.4828
44.2606	40.7516	70.9831
52.5106	69.4342	19.7286
73.833	11.5402	68.1874
76.7459	36.6395	63.1356
46.2344	63.4182	51.488
66.9629	73.8815	60.0189
79.9256	45.4009	47.9742
60.2719	75.8855	66.4199
67.6834	80.6345	59.0679
83.0971	75.2033	6.48932
60.2719	67.1601	30.9321
72.8006	6.89462	50.6834
72.8007	53.5468	45.3726
13.7641	54.9814	83.512
63.9351	42.257	29.9811
12.8009	53.0017	64.4828
43.764	1.2356	53.7671
81.963	79.0641	36.233
72.8006	35.4386	66.743
72.8006	60.2719	60.0133
68.4017	52.5758	68.4156
34.3024	81.9422	81.7733
58.5079	84.9503	53.2269
79.5534	40.5252	63.163
60.2688	79.4711	59.0195
68.037	64.6701	12.5455
47.8503	83.3087	83.1054
83.9205	41.472	69.4343
44.2261	88.6092	37.8697
75.0464	43.7644	84.5258
66.0136	46.2348	52.5105
72.8018	61.7685	47.8723
63.0545	14.1866	84.8765
65.8893	80.8209	38.5701
50.1045	49.602	75.6725
69.4744	9.36583	63.4342
60.5583	63.1909	79.7917
87.4221	73.6633	72.8186
67.9922	73.833	61.4907
57.3058	37.9384	88.7644
71.6617	79.0351	60.2733
51.9463	60.5002	61.006
83.1053	46.2356	64.6705
50.4741	50.8895	87.7674
69.3244	84.3656	51.3378
46.2359	66.4604	76.8756
88.7645	43.7644	52.5758
72.819	87.7673	88.7644
79.5763	61.6119	52.6644
65.8006	53.9684	27.3748
69.6641	70.7734	38.1056
54.3657	74.5363	81.9982
87.4324	34.9258	76.1116
89.9832	76.2994	37.4896
75.0466	17.1998	58.623
87.4214	72.8011	47.8268
40.7514	66.9611	71.6619
76.1345	39.8955	2.70956
54.3657	80.3375	68.0369
56.2931	88.7644	43.6332
73.4167	62.7399	81.4121
88.7644	22.9576	37.6488
41.8552	81.2276	88.7644
88.7644	63.7475	81.9894
89.1902	24.5338	83.324
53.0246	76.4998	8.84497
75.9802	1.2355	85.2266
43.7647	59.5602	73.3688
87.2213	87.7935	79.4673
10.0744	32.4545	81.1698
30.1448	63.0939	40.5248
55.6979	59.2885	63.7476
54.65	70.3565	46.2355
35.6342	51.43	88.7647
39.1106	78.8965	17.79
81.1698	65.9307	71.065
67.737	32.4547	61.1183
63.7475	69.3244	66.6685
66.0706	43.8497	52.9754
43.7644	69.2243	39.4466
39.1109	75.527	17.1994
72.8005	0.016754	73.3568
62.6504	86.472	6.89447
50.6344	54.3843	52.3822
73.2403	29.8461	52.1303
79.1045	56.955	70.3378
83.1067	76.8758	36.7735
88.7644	76.6147	70.3302
75.2902	73.3852	88.7644
21.2186	48.0323	46.2355
22.8069	86.9167	84.5256
78.5204	45.8098	49.098
56.5687	7.2446	39.679
38.1055	34.9256	85.1429
35.616	66.4605	70.3307
73.5855	41.472	64.6711
64.9258	22.6062	88.7461
36.7734	53.1885	88.7644
6.76315	44.7521	26.5818
72.8005		67.3166
88.7649		76.1671
		31.2357
		76.835
		7.29517
		43.1415
		59.1616
		47.8503
		84.8953
		23.2085
		12.0759
		22.0078
		43.7644
		49.3021
		76.2356
		46.2355
		88.746
		24.0692
		63.7611
		69.6644
		69.4341
		43.7639
		48.5281
		73.357
		69.4343
		52.9268
		16.5091
		70.3295
		71.1421
