# Supplementary material for: Unipolar distributions of junctional Myosin II identify cell stripe boundaries that drive cell intercalation throughout Drosophila axis extension
Source: eLife journal article supplement (doi:10.7554/elife.12094), 2016-05-16
Supplement: supp [file elife-12094-supp-v1.zip › elife_poa_e12094_Figure_5_source_data_1.xlsx]

## Sheet: A
Figure 5A	Interface Myosin II f.i. vs Interface orientation
	0-25 mins of GBE									25-50 mins of GBE
	Boundary interfaces				Non-boundary interfaces				Boundary vs non-boundary comparison	Boundary interfaces				Non-boundary interfaces				Boundary vs non-boundary comparison
Interface orientation relative to AP axis (center of bin, deg.)	lower CI	Mean	upper CI	N	lower CI	Mean	upper CI	N	P-value	lower CI	Mean	upper CI	N	lower CI	Mean	upper CI	N	P-value
0.899118	14.6693	21.0947	27.5201	526	16.0431	21.7639	27.4848	7044	0.240697	25.7065	36.5064	47.3063	508	24.2352	32.3227	40.4102	14411	0.456728
2.69915	14.7568	21.0263	27.2957	681	15.9125	21.6063	27.3	8791	0.766351	25.9624	36.4936	47.0249	650	24.1752	32.2209	40.2666	18084	0.217305
4.49919	14.6393	20.8767	27.1142	858	15.977	21.6695	27.3619	10587	0.182304	26.4518	36.8471	47.2423	829	24.1366	32.1385	40.1405	21606	0.836735
6.29923	14.677	20.8358	26.9945	1018	15.9227	21.5235	27.1242	12126	0.540093	26.8611	37.2753	47.6894	942	23.958	31.8391	39.7203	24933	0.00214084
8.09926	14.5814	20.974	27.3667	1132	15.9683	21.601	27.2337	12512	0.799074	27.5554	37.9633	48.3712	1056	23.7804	31.8142	39.8479	26095	0.123689
9.8993	14.5354	20.817	27.0986	1222	15.8914	21.5089	27.1263	12397	0.0119207	28.0789	38.5146	48.9503	1117	23.7279	31.6149	39.5019	25933	0.00147887
11.6993	14.7295	20.9673	27.2051	1329	15.636	21.1852	26.7345	12620	0.69747	29.7932	40.2946	50.796	1253	23.4262	31.2971	39.1681	26529	4.16712e-07
13.4994	14.9666	21.0418	27.1169	1431	15.591	21.0009	26.4108	12568	0.994114	29.7542	40.0347	50.3152	1393	23.1455	30.8882	38.6308	26682	4.81793e-10
15.2994	15.487	21.7855	28.084	1636	15.6789	21.0866	26.4943	12878	0.545177	30.2768	40.4315	50.5861	1590	22.9852	30.7162	38.4471	27023	2.74599e-08
17.0994	15.4267	22.0493	28.6719	1833	15.4989	20.8273	26.1557	13125	0.00237336	29.5991	39.657	49.715	1757	22.6854	30.4199	38.1543	27822	4.23381e-26
18.8995	15.8425	22.4901	29.1377	2098	15.4878	20.8707	26.2536	13633	0.477078	30.0653	40.0557	50.0461	2125	22.6778	30.474	38.2701	28729	7.1845e-07
20.6995	16.5771	23.1285	29.6798	2488	15.303	20.6291	25.9553	13842	0.00767603	30.3472	40.4866	50.626	2547	22.5309	30.2221	37.9132	28883	1.36377e-18
22.4995	16.9175	23.5517	30.1859	2894	15.1969	20.5958	25.9946	14324	0.00216161	30.5535	40.5879	50.6223	3046	22.3804	30.1316	37.8828	29855	2.45108e-10
24.2996	17.1581	23.7192	30.2803	3414	15.0389	20.4457	25.8524	14792	0.000578914	30.4527	40.2881	50.1235	3522	22.0715	29.7821	37.4926	30110	2.15171e-31
26.0996	17.1223	23.7038	30.2854	4149	14.9114	20.3764	25.8415	15528	5.2716e-17	30.6329	40.8511	51.0694	4398	22.0287	29.7644	37.5001	30950	1.39831e-53
27.8997	16.7858	23.2647	29.7436	4669	14.7459	20.198	25.6502	15940	6.87049e-06	30.4799	40.8021	51.1242	4984	21.7315	29.4189	37.1063	31314	1.20073e-42
29.6997	16.7059	23.0225	29.3391	5266	14.6317	20.0636	25.4956	16354	1.16037e-12	30.5627	40.8278	51.0929	5651	21.6352	29.2071	36.779	31500	3.96977e-61
31.4997	16.9077	23.2799	29.6521	6113	14.5947	20.0003	25.406	16969	1.28577e-07	30.4444	40.7862	51.1281	6574	21.4118	28.9781	36.5444	32337	9.81579e-74
33.2998	16.9151	23.5833	30.2514	6776	14.7157	20.2529	25.7901	17426	0.0251623	30.361	40.8633	51.3656	7552	21.2345	28.7927	36.3509	32896	4.85015e-64
35.0998	16.9462	23.5251	30.1041	7595	14.714	20.149	25.584	17866	0.000961482	30.2919	40.6308	50.9697	8297	21.0397	28.4902	35.9406	32973	2.03805e-66
36.8998	17.1243	24.0137	30.9031	8408	14.865	20.3391	25.8131	18289	3.20417e-16	30.6975	41.3415	51.9855	9619	21.0044	28.5421	36.0799	33693	1.2777e-97
38.6999	17.4117	24.5006	31.5896	9265	14.9604	20.3794	25.7984	18573	4.52994e-11	31.092	41.6309	52.1698	10439	20.9575	28.4224	35.8872	33915	3.25802e-116
40.4999	17.7912	24.9509	32.1106	10481	14.9427	20.3523	25.7619	18968	4.17469e-14	31.2617	41.7038	52.1459	11686	21.0001	28.4256	35.8511	34655	4.28243e-75
42.2999	18.1819	25.4116	32.6414	11686	14.9529	20.4771	26.0014	19488	6.15796e-27	31.5883	42.1757	52.7632	13170	20.8963	28.4261	35.9559	35400	3.02574e-164
44.1	18.249	25.5198	32.7906	12747	14.806	20.3655	25.9251	19739	1.05676e-31	31.9001	42.4473	52.9945	14180	20.7408	28.1854	35.6301	35528	3.91286e-138
45.9	18.3725	25.7041	33.0357	14269	14.6929	20.2018	25.7107	19959	9.80843e-35	31.967	42.3822	52.7973	15337	20.7188	28.1597	35.6006	35647	9.1787e-144
47.7001	18.5571	25.9832	33.4092	15711	14.5803	20.151	25.7216	20057	4.30353e-33	32.196	42.6891	53.1821	16846	20.7647	28.2086	35.6524	35734	3.10403e-210
49.5001	18.7133	25.9897	33.2661	17009	14.5004	20.0215	25.5426	19912	1.17977e-39	32.0453	42.3041	52.5629	17404	20.8061	28.1096	35.413	35456	1.15321e-217
51.3001	18.702	25.9167	33.1314	18238	14.3264	19.8531	25.3798	19625	2.29545e-47	31.776	41.9972	52.2185	18245	20.5211	27.7609	35.0008	35169	1.27225e-195
53.1002	18.8682	26.2078	33.5474	19529	14.3364	19.9174	25.4984	19350	7.59802e-57	32.2034	42.5375	52.8717	19720	20.549	27.8691	35.1892	34855	1.18737e-219
54.9002	19.0156	26.3134	33.6113	20755	14.2626	19.768	25.2734	18861	4.61525e-50	32.2507	42.4947	52.7386	20350	20.6225	27.8722	35.1219	33871	2.10212e-176
56.7002	19.3373	26.6635	33.9897	22314	14.3505	19.859	25.3675	18392	5.26664e-55	32.39	42.5581	52.7263	21801	20.7646	28.048	35.3314	33079	1.76618e-228
58.5003	19.6875	27.0571	34.4267	23266	14.407	19.8759	25.3447	17773	2.16744e-63	32.5172	42.6346	52.752	22655	20.9067	28.1651	35.4235	32107	1.91194e-259
60.3003	20.1148	27.472	34.8292	24170	14.5752	20.0323	25.4895	17031	1.46846e-59	32.3993	42.4083	52.4173	23508	21.0266	28.2816	35.5366	31037	5.77777e-197
62.1003	20.4355	27.937	35.4385	25011	14.6484	20.1618	25.6753	16259	2.59185e-74	32.3262	42.3485	52.3708	24478	21.074	28.3749	35.6759	30170	6.20869e-249
63.9004	21.0147	28.5809	36.1471	25838	15.0471	20.6691	26.2912	15609	2.00233e-79	32.5048	42.48	52.4551	25611	21.4793	28.8544	36.2296	29467	3.19541e-186
65.7004	21.4094	28.9844	36.5593	26411	15.2679	20.9166	26.5652	14794	6.90504e-79	32.2467	42.0616	51.8765	25818	21.6552	28.9892	36.3233	28410	5.14242e-162
67.5005	21.8196	29.4375	37.0554	27269	15.7526	21.5081	27.2637	14198	1.54043e-82	32.3432	42.0937	51.8443	26852	21.7599	29.1314	36.5029	27925	2.70988e-173
69.3005	22.1426	29.8017	37.4607	27527	16.2558	22.0787	27.9016	13346	6.93369e-53	32.2027	41.8704	51.5381	27020	21.9171	29.3654	36.8138	26959	6.71117e-179
71.1005	22.4633	30.1484	37.8336	28731	16.8835	22.8413	28.7991	12736	3.80842e-63	32.4436	42.1257	51.8078	28151	22.1609	29.7015	37.2421	26496	1.45289e-156
72.9006	22.3997	30.072	37.7443	28855	17.442	23.518	29.594	12039	7.67273e-41	32.6143	42.302	51.9896	28401	22.2018	29.7902	37.3787	25511	4.98279e-187
74.7006	22.4871	30.0789	37.6707	29613	18.1547	24.3626	30.5706	11627	2.35747e-38	32.7673	42.4507	52.1341	29091	22.4878	30.1551	37.8223	24972	1.84685e-147
76.5006	22.5839	30.1659	37.7479	30265	18.7367	25.0555	31.3742	11205	5.47165e-29	33.0915	42.6904	52.2892	29768	22.7475	30.4713	38.1952	24131	9.8638e-165
78.3007	22.6801	30.3617	38.0434	30885	19.3339	25.816	32.2981	10823	3.07402e-12	33.3426	43.0666	52.7907	30878	22.8925	30.8176	38.7427	23417	2.71996e-150
80.1007	22.7442	30.4251	38.106	31007	19.9978	26.6653	33.3328	10394	5.84525e-09	33.385	42.9896	52.5943	31459	23.2753	31.2318	39.1882	22577	4.12378e-119
81.9007	22.7303	30.4298	38.1292	31735	20.4407	27.2696	34.0986	10268	3.94776e-08	33.3939	43.1039	52.814	32797	23.6018	31.6552	39.7087	22257	9.53684e-143
83.7008	22.7529	30.3932	38.0335	30638	20.7751	27.6976	34.6202	9898	9.74182e-12	33.2663	42.8963	52.5262	32553	23.8037	31.8261	39.8486	21240	1.50825e-125
85.5008	22.9445	30.6451	38.3457	26700	21.0687	28.0743	35.0799	8492	0.0295376	33.3319	42.9585	52.5852	28486	24.0356	32.1276	40.2196	18291	1.0052e-97
87.3008	23.0274	30.8046	38.5819	22230	21.2369	28.3182	35.3995	7019	1.71261e-05	33.4652	43.0689	52.6726	24197	24.2343	32.3614	40.4884	14967	1.17408e-106
89.1009	22.9188	30.743	38.5671	17695	21.3823	28.5264	35.6705	5564	0.00318612	33.1475	42.8394	52.5313	19591	24.2379	32.4507	40.6635	11797	4.2637e-93

## Sheet: C
Figure 5C	Interface length and Interface Myosin II prior to and after T1 transition
	Interface length (µm)				interface Myosin II (f.i.)
Time relative to T1 transition (mins)	lower CI	Mean	upper CI	N	lower CI	Mean	upper CI	N
-30	4.65236	5.69217	6.73199	939	16.7547	23.6432	30.5317	920
-29.5	4.63476	5.67783	6.72089	1205	16.7877	23.7146	30.6416	1177
-29	4.64405	5.68691	6.72978	1476	16.8013	23.7424	30.6836	1445
-28.5	4.66715	5.71633	6.76551	1767	16.7548	23.6472	30.5396	1728
-28	4.70116	5.74852	6.79588	1846	16.8422	23.6416	30.4409	1808
-27.5	4.75083	5.79329	6.83576	1926	16.7927	23.4946	30.1965	1894
-27	4.77322	5.81659	6.85995	2012	16.953	23.6316	30.3101	1981
-26.5	4.76944	5.80541	6.84138	2094	17.2421	23.8852	30.5284	2066
-26	4.79674	5.83095	6.86515	2169	17.4632	24.0275	30.5917	2144
-25.5	4.79285	5.8228	6.85275	2253	17.7899	24.4174	31.0449	2226
-25	4.78868	5.80635	6.82402	2320	18.2911	24.932	31.5729	2294
-24.5	4.76966	5.78403	6.7984	2392	18.5856	25.3259	32.0662	2369
-24	4.73386	5.74462	6.75538	2478	18.9529	25.7942	32.6354	2456
-23.5	4.70888	5.71415	6.71942	2563	19.4151	26.3646	33.3142	2541
-23	4.70167	5.70346	6.70525	2660	19.638	26.7009	33.7638	2640
-22.5	4.64985	5.6503	6.65074	2767	19.8469	26.9673	34.0877	2746
-22	4.61965	5.61652	6.61339	2877	19.9092	27.0388	34.1684	2857
-21.5	4.58614	5.57948	6.57281	2999	19.9835	27.2119	34.4402	2981
-21	4.54004	5.53508	6.53012	3130	20.214	27.5625	34.911	3105
-20.5	4.50426	5.49822	6.49219	3260	20.3906	27.7741	35.1576	3227
-20	4.46358	5.45258	6.44159	3394	20.4722	27.9464	35.4205	3353
-19.5	4.41728	5.40575	6.39423	3537	20.7389	28.29	35.841	3489
-19	4.37289	5.35713	6.34138	3677	21.0374	28.6269	36.2164	3625
-18.5	4.32588	5.30836	6.29083	3830	21.4096	29.1091	36.8086	3775
-18	4.27118	5.25598	6.24077	3986	21.5987	29.3262	37.0538	3921
-17.5	4.21358	5.19684	6.1801	4152	21.8021	29.5673	37.3325	4078
-17	4.15667	5.13539	6.11411	4321	22.0645	29.9546	37.8448	4244
-16.5	4.11027	5.08692	6.06358	4493	22.3005	30.2514	38.2022	4412
-16	4.04235	5.01225	5.98215	4664	22.6148	30.5566	38.4984	4584
-15.5	3.97317	4.93558	5.89799	4848	22.9158	30.9288	38.9417	4757
-15	3.90497	4.8561	5.80723	5025	23.2415	31.2778	39.3141	4934
-14.5	3.83147	4.77003	5.7086	5212	23.6425	31.7208	39.7991	5121
-14	3.74376	4.6721	5.60044	5398	24.0916	32.2321	40.3725	5308
-13.5	3.65323	4.57264	5.49205	5586	24.5738	32.7473	40.9208	5487
-13	3.53531	4.44371	5.35211	5782	25.2461	33.5485	41.851	5681
-12.5	3.43415	4.32974	5.22534	5966	25.8432	34.2694	42.6957	5856
-12	3.33504	4.21605	5.09706	6154	26.4038	34.9083	43.4128	6047
-11.5	3.23199	4.09821	4.96444	6344	27.0375	35.5997	44.1619	6229
-11	3.11919	3.96924	4.81929	6536	27.7758	36.4228	45.0699	6406
-10.5	3.02463	3.85314	4.68164	6721	28.4437	37.1254	45.8071	6571
-10	2.93128	3.73843	4.54558	6886	29.1133	37.8534	46.5936	6722
-9.5	2.83975	3.62351	4.40727	7060	29.7442	38.4531	47.162	6886
-9	2.73635	3.49791	4.25946	7245	30.3793	39.0675	47.7557	7055
-8.5	2.62878	3.37182	4.11486	7417	31.0673	39.7279	48.3885	7199
-8	2.48805	3.21201	3.93596	7610	31.8578	40.5593	49.2609	7360
-7.5	2.35272	3.05595	3.75919	7797	32.6341	41.4219	50.2096	7526
-7	2.21076	2.8981	3.58544	7989	33.3098	42.2181	51.1263	7676
-6.5	2.06114	2.7254	3.38965	8207	34.0454	43.0756	52.1059	7855
-6	1.90393	2.54765	3.19137	8411	34.7556	43.8856	53.0156	7992
-5.5	1.75365	2.37399	2.99432	8580	35.5888	44.8593	54.1299	8091
-5	1.59852	2.19329	2.78807	8748	36.5267	45.9751	55.4234	8177
-4.5	1.45417	2.02654	2.59891	8871	37.231	46.8055	56.38	8187
-4	1.31624	1.86405	2.41186	8976	37.8139	47.5438	57.2737	8177
-3.5	1.17828	1.69499	2.2117	9048	38.6248	48.4606	58.2963	8111
-3	1.04408	1.53403	2.02397	9087	39.2716	49.269	59.2665	7966
-2.5	0.911649	1.37542	1.83918	9090	39.8225	50.0112	60.2	7735
-2	0.777029	1.2204	1.66377	9089	40.2992	50.6707	61.0421	7411
-1.5	0.641534	1.05671	1.47188	9241	40.5418	51.0496	61.5573	7051
-1	0.586755	0.984284	1.38181	7940	40.7699	51.4021	62.0343	5910
-0.5	0.526137	0.908931	1.29172	6633	41.0797	51.7832	62.4867	4769
0	0.468753	0.834757	1.20076	5331	41.1014	51.949	62.7967	3682
0	0.508516	0.860309	1.2121	5621	39.0787	50.1847	61.2907	4353
0.5	0.57441	0.943285	1.31216	6802	38.7282	49.754	60.7798	5433
1	0.635278	1.02627	1.41727	7992	38.3512	49.3201	60.289	6528
1.5	0.690433	1.10013	1.50983	9165	37.8054	48.7105	59.6156	7601
2	0.869151	1.30597	1.74279	8470	36.7809	47.5384	58.2959	7460
2.5	1.00366	1.45908	1.91449	8277	36.2282	46.8551	57.4819	7480
3	1.12251	1.59531	2.0681	8171	35.5937	46.0767	56.5596	7512
3.5	1.24766	1.73641	2.22516	8018	34.8456	45.2131	55.5807	7475
4	1.35801	1.86597	2.37394	7879	34.1296	44.4164	54.7031	7404
4.5	1.47015	1.99517	2.5202	7719	33.43	43.5774	53.7247	7302
5	1.58564	2.12601	2.66638	7541	32.9637	43.0163	53.0688	7192
5.5	1.6992	2.2574	2.81559	7355	32.3997	42.2619	52.1242	7055
6	1.80179	2.37556	2.94933	7174	31.9021	41.598	51.2939	6901
6.5	1.90277	2.49284	3.08291	7015	31.3614	40.9718	50.5822	6772
7	2.01114	2.61762	3.2241	6849	30.9267	40.4606	49.9945	6648
7.5	2.11053	2.7337	3.35687	6709	30.5044	39.9476	49.3907	6521
8	2.20996	2.84805	3.48614	6559	30.1212	39.5074	48.8935	6395
8.5	2.29983	2.96001	3.62019	6427	29.856	39.1264	48.3968	6282
9	2.3868	3.06881	3.75083	6281	29.5932	38.8297	48.0662	6146
9.5	2.4787	3.18855	3.89839	6133	29.3215	38.5893	47.8571	6011
10	2.57536	3.30915	4.04295	5976	29.2158	38.4103	47.6047	5872
10.5	2.65218	3.41032	4.16846	5839	29.0247	38.1765	47.3282	5741
11	2.73165	3.50805	4.28446	5679	28.9555	38.0227	47.09	5591
11.5	2.78464	3.58195	4.37926	5515	28.9661	38.0162	47.0662	5426
12	2.85311	3.66868	4.48426	5351	28.8592	37.9468	47.0344	5266
12.5	2.91347	3.742	4.57054	5207	28.7307	37.8225	46.9144	5129
13	2.97191	3.80927	4.64664	5056	28.6235	37.6985	46.7736	4985
13.5	3.03709	3.88332	4.72956	4897	28.5139	37.6294	46.745	4828
14	3.10452	3.95978	4.81504	4735	28.4247	37.5408	46.657	4666
14.5	3.17454	4.04309	4.91164	4585	28.2589	37.4691	46.6794	4520
15	3.25567	4.14142	5.02717	4445	28.0668	37.3018	46.5368	4388
15.5	3.32882	4.22398	5.11914	4305	27.8778	37.0765	46.2752	4249
16	3.40778	4.31553	5.22328	4160	27.8476	37.0786	46.3096	4108
16.5	3.48767	4.40478	5.32189	4022	27.738	36.9543	46.1706	3970
17	3.5505	4.48614	5.42178	3899	27.5463	36.8029	46.0595	3847
17.5	3.61809	4.56893	5.51976	3777	27.3917	36.6706	45.9494	3729
18	3.68182	4.65065	5.61948	3659	27.3164	36.5055	45.6946	3615
18.5	3.75397	4.73031	5.70666	3540	27.114	36.3	45.486	3496
19	3.81426	4.80577	5.79728	3423	26.8729	36.1019	45.3309	3379
19.5	3.8716	4.875	5.8784	3316	26.589	35.8324	45.0758	3272
20	3.92304	4.94726	5.97147	3203	26.4864	35.7586	45.0309	3163
20.5	3.9757	5.00296	6.03021	3093	26.4437	35.6811	44.9184	3057
21	4.02095	5.05415	6.08736	2984	26.4293	35.6757	44.9221	2948
21.5	4.06322	5.09782	6.13243	2865	26.4861	35.7221	44.958	2828
22	4.10733	5.14477	6.18222	2748	26.5675	35.7466	44.9257	2711
22.5	4.16052	5.19466	6.2288	2627	26.7887	35.989	45.1894	2598
23	4.20627	5.24384	6.28141	2509	27.0045	36.1703	45.3362	2484
23.5	4.25004	5.28287	6.3157	2406	27.2591	36.4016	45.5441	2383
24	4.30234	5.34403	6.38571	2300	27.3925	36.5184	45.6444	2278
24.5	4.35865	5.40128	6.44391	2200	27.4	36.3734	45.3468	2182
25	4.41845	5.46647	6.5145	2108	27.2401	36.0679	44.8957	2091
25.5	4.46543	5.51764	6.56985	2016	27.2239	35.9128	44.6017	2004
26	4.52126	5.58196	6.64266	1927	27.0531	35.5693	44.0854	1915
26.5	4.58	5.63985	6.6997	1832	27.0713	35.4264	43.7815	1821
27	4.61047	5.67797	6.74546	1734	26.994	35.2348	43.4757	1725
27.5	4.6258	5.70004	6.77428	1646	26.9994	35.1255	43.2516	1640
28	4.64501	5.73979	6.83457	1557	26.9645	35.1005	43.2365	1551
28.5	4.67418	5.77708	6.87998	1470	26.9633	35.1152	43.267	1466
29	4.69963	5.80893	6.91824	1222	27.0401	35.2293	43.4185	1219
29.5	4.68588	5.80292	6.91995	990	27.3169	35.5571	43.7974	987
30	4.67249	5.80891	6.94533	774	27.2157	35.5334	43.8511	772

## Sheet: E
Figure 5E	Boundary vs non-Boundary interface length deviation (µm)
	All interfaces				Boundary interfaces				Non-boundary interfaces				Boundary vs non-boundary comparison
Time after GBE onset (mins)	lower CI	Mean	upper CI	N	lower CI	Mean	upper CI	N	lower CI	Mean	upper CI	N	P-value
-20	0.745539	0.358977	-0.0275854	2074	0.711185	0.330939	-0.0493065	1292	0.817809	0.420373	0.0229358	782	0.439353
-19	0.748666	0.357788	-0.0330889	2631	0.712962	0.326408	-0.0601462	1639	0.814091	0.416088	0.0180853	992	0.197414
-18	0.759226	0.408848	0.0584698	3219	0.726335	0.377114	0.0278928	2014	0.823322	0.471118	0.118914	1205	0.606111
-17	0.739194	0.390033	0.0408719	3829	0.703356	0.355362	0.00736895	2401	0.811323	0.460418	0.109512	1428	0.529001
-16	0.721131	0.397026	0.0729219	4288	0.683864	0.359385	0.0349064	2708	0.795508	0.472317	0.149126	1580	0.0554758
-15	0.711247	0.383816	0.056385	4730	0.674034	0.345889	0.0177447	3014	0.785838	0.460341	0.134843	1716	0.0586806
-14	0.71072	0.379806	0.0488923	5157	0.672136	0.337805	0.00347299	3306	0.78997	0.466665	0.14336	1851	0.272404
-13	0.709395	0.377516	0.0456371	5615	0.666869	0.327609	-0.0116523	3616	0.794655	0.479209	0.163764	1999	0.124652
-12	0.710712	0.378249	0.0457865	6073	0.66463	0.323009	-0.0186125	3926	0.799781	0.488316	0.176851	2147	0.011314
-11	0.720313	0.38445	0.0485862	6506	0.666502	0.321097	-0.0243076	4206	0.822252	0.509472	0.196691	2300	0.00308869
-10	0.740043	0.398434	0.0568255	6931	0.678918	0.324756	-0.029406	4479	0.84929	0.538582	0.227874	2452	6.15551e-05
-9	0.758796	0.41204	0.0652844	7037	0.685285	0.326238	-0.0328095	4541	0.885054	0.570903	0.256752	2496	2.25114e-05
-8	0.78484	0.429474	0.0741075	7138	0.700748	0.331761	-0.0372265	4596	0.923332	0.605487	0.287641	2542	4.79785e-07
-7	0.818319	0.450575	0.0828311	7223	0.720774	0.337604	-0.0455655	4636	0.973913	0.649801	0.325689	2587	3.66658e-07
-6	0.858293	0.475342	0.0923915	7235	0.748602	0.347786	-0.05303	4628	1.02912	0.697563	0.366007	2607	3.60298e-08
-5	0.917293	0.510493	0.103692	7236	0.79374	0.367112	-0.0595156	4609	1.11038	0.761068	0.411761	2627	2.06301e-09
-4	0.974857	0.54106	0.107263	7262	0.831221	0.376525	-0.0781701	4603	1.19976	0.828304	0.456847	2659	3.10238e-10
-3	1.04603	0.576577	0.107126	7336	0.87407	0.383759	-0.106551	4624	1.31993	0.917311	0.514687	2712	4.54363e-12
-2	1.1246	0.612817	0.101032	7522	0.925107	0.39104	-0.143028	4708	1.43301	0.996146	0.559285	2814	5.76943e-10
-1	1.21642	0.657946	0.0994699	7744	0.985752	0.405459	-0.174834	4805	1.56178	1.08235	0.602925	2939	6.44149e-13
0	1.30122	0.699206	0.097197	8028	1.03823	0.415948	-0.206335	4947	1.68411	1.16432	0.644528	3081	9.10856e-17
1	1.37776	0.732461	0.0871648	8415	1.08264	0.416137	-0.250367	5158	1.79902	1.24556	0.692094	3257	1.09714e-18
2	1.44795	0.76514	0.0823294	8911	1.11501	0.412158	-0.29069	5433	1.91463	1.33131	0.747993	3478	3.15169e-20
3	1.51773	0.803352	0.0889779	9436	1.15233	0.41859	-0.315145	5728	2.02409	1.41664	0.809187	3708	1.36059e-23
4	1.57232	0.834273	0.0962255	10011	1.18035	0.421822	-0.336706	6048	2.10635	1.48413	0.861918	3963	9.28374e-30
5	1.61411	0.856325	0.0985371	10625	1.19799	0.416216	-0.36556	6417	2.17734	1.55072	0.924102	4208	1.47716e-35
6	1.64033	0.872471	0.104607	11280	1.19974	0.406148	-0.387439	6801	2.22863	1.60425	0.979873	4479	1.55926e-37
7	1.64936	0.874764	0.10017	12005	1.19501	0.390129	-0.414755	7212	2.24192	1.62576	1.00961	4793	1.69182e-40
8	1.64814	0.874801	0.101464	12731	1.1908	0.382811	-0.425176	7605	2.22757	1.6224	1.01722	5126	1.00682e-47
9	1.62891	0.859921	0.0909281	13425	1.17667	0.36859	-0.439492	7981	2.18808	1.59448	1.00088	5444	2.30838e-56
10	1.60753	0.845135	0.0827397	14146	1.15653	0.3533	-0.449935	8352	2.1502	1.56391	0.977626	5794	6.90949e-58
11	1.58436	0.830612	0.0768678	14832	1.1339	0.337514	-0.458872	8693	2.11335	1.53659	0.959836	6139	1.42663e-57
12	1.56765	0.823379	0.0791098	15489	1.11485	0.327741	-0.459367	8975	2.08232	1.51158	0.940846	6514	5.69081e-55
13	1.54792	0.811506	0.0750909	16154	1.09231	0.311945	-0.468417	9267	2.05069	1.4879	0.925107	6887	3.97074e-57
14	1.53333	0.803769	0.0742129	16808	1.06708	0.294911	-0.47726	9534	2.03485	1.47589	0.91693	7274	1.8378e-61
15	1.52171	0.796681	0.0716475	17433	1.03998	0.275218	-0.489548	9768	2.02788	1.46791	0.907947	7665	1.8452e-69
16	1.51384	0.789544	0.0652517	18061	1.00981	0.246915	-0.515982	9982	2.0291	1.46975	0.9104	8079	9.74648e-83
17	1.50728	0.782069	0.0568613	18703	0.986429	0.219991	-0.546446	10181	2.02205	1.46558	0.909122	8522	1.96226e-92
18	1.5079	0.779269	0.0506337	19428	0.975301	0.203284	-0.568732	10412	2.01787	1.45746	0.897048	9016	1.47511e-91
19	1.51668	0.78427	0.0518578	20112	0.981909	0.201713	-0.578484	10590	2.01031	1.44494	0.879568	9522	4.26989e-101
20	1.52912	0.792449	0.0557753	20777	0.99662	0.207859	-0.580903	10730	2.00315	1.42946	0.855769	10047	1.4165e-93
21	1.5509	0.809582	0.0682676	21364	1.03004	0.230087	-0.569867	10803	1.99663	1.41449	0.832347	10561	7.11443e-84
22	1.56942	0.824949	0.0804734	21932	1.06104	0.250203	-0.560639	10854	1.98539	1.39865	0.8119	11078	1.88419e-72
23	1.59264	0.845924	0.0992118	22492	1.10007	0.281274	-0.537527	10896	1.97953	1.38556	0.791594	11596	4.4717e-71
24	1.61293	0.865005	0.11708	23009	1.13733	0.311754	-0.513824	10918	1.97174	1.37215	0.772563	12091	2.54437e-61
25	1.63538	0.885637	0.135893	23441	1.17458	0.34157	-0.491441	10871	1.96814	1.36263	0.757128	12570	9.44616e-63
26	1.64958	0.897561	0.145539	23827	1.20139	0.36256	-0.476268	10822	1.96263	1.34929	0.735959	13005	5.43994e-64
27	1.6601	0.90694	0.153783	24176	1.22879	0.384662	-0.459471	10730	1.94941	1.32934	0.709269	13446	7.74955e-60
28	1.65928	0.906394	0.15351	24489	1.23423	0.390242	-0.453742	10650	1.93572	1.30897	0.682233	13839	6.2292e-54
29	1.65946	0.903235	0.147008	24727	1.23608	0.389824	-0.456433	10554	1.92862	1.29128	0.653938	14173	9.06577e-46
30	1.65938	0.902731	0.146078	24922	1.24539	0.399258	-0.446871	10418	1.9157	1.27021	0.624714	14504	4.98502e-40
31	1.65488	0.897676	0.140469	25056	1.25012	0.404955	-0.440205	10272	1.8997	1.24598	0.592265	14784	1.7903e-44
32	1.64332	0.887114	0.13091	25086	1.24845	0.407274	-0.433899	10108	1.87742	1.21656	0.555698	14978	1.37358e-44
33	1.63111	0.879119	0.127129	25108	1.24674	0.412543	-0.421652	9937	1.85387	1.18985	0.525824	15171	3.08105e-37
34	1.62496	0.871602	0.118248	25130	1.24613	0.412418	-0.42129	9800	1.84139	1.17084	0.500301	15330	6.68374e-35
35	1.62752	0.871542	0.115568	25221	1.26408	0.427417	-0.409246	9701	1.83097	1.15393	0.476893	15520	1.50495e-29
36	1.62723	0.869035	0.110844	25297	1.28503	0.442822	-0.39939	9609	1.81422	1.13377	0.453315	15688	6.27926e-25
37	1.62196	0.861202	0.100444	25417	1.28969	0.44368	-0.402332	9563	1.79942	1.1152	0.430987	15854	7.98121e-25
38	1.62531	0.860073	0.0948382	25373	1.30037	0.448614	-0.403137	9448	1.79493	1.10518	0.41542	15925	1.10068e-22
39	1.62773	0.860198	0.0926655	25265	1.31047	0.455789	-0.398895	9309	1.78999	1.09637	0.402751	15956	1.81628e-23
40	1.63365	0.85809	0.0825259	25009	1.31229	0.450658	-0.41097	9126	1.79527	1.09164	0.38801	15883	2.74445e-27
41	1.63332	0.854138	0.074955	24713	1.30461	0.443721	-0.417164	8960	1.79791	1.08692	0.375937	15753	1.65557e-25
42	1.62916	0.845918	0.0626796	24321	1.287	0.425701	-0.435593	8754	1.80006	1.08215	0.364235	15567	2.01756e-20
43	1.63776	0.849295	0.060825	23886	1.28765	0.426793	-0.434061	8533	1.81252	1.08454	0.356566	15353	1.73731e-20
44	1.6506	0.855125	0.0596461	23293	1.30072	0.434955	-0.430806	8274	1.82549	1.08777	0.350043	15019	6.33588e-22
45	1.66431	0.862016	0.0597185	22822	1.31048	0.441649	-0.427186	8097	1.84297	1.0954	0.347825	14725	6.13509e-22
46	1.6836	0.870929	0.0582633	22395	1.31701	0.441555	-0.433904	7956	1.87018	1.11028	0.35038	14439	3.1344e-17
47	1.69873	0.880941	0.0631578	21974	1.32968	0.450932	-0.427813	7817	1.88735	1.12109	0.35483	14157	1.06416e-15
48	1.72272	0.897745	0.0727681	21619	1.35436	0.465178	-0.424009	7693	1.9097	1.13835	0.367008	13926	7.19525e-18
49	1.74527	0.914236	0.0832053	21192	1.37219	0.475698	-0.42079	7541	1.93366	1.15741	0.381164	13651	1.60015e-19
50	1.75495	0.924929	0.0949097	20820	1.37331	0.47897	-0.415366	7414	1.94786	1.17265	0.397443	13406	1.85097e-16
51	1.76566	0.935591	0.105521	20557	1.36697	0.473183	-0.420606	7319	1.96725	1.19294	0.418625	13238	1.03281e-19
52	1.77269	0.945527	0.11836	20285	1.3658	0.473828	-0.418141	7202	1.97786	1.20772	0.437578	13083	5.28842e-22
53	1.78272	0.956429	0.130138	19859	1.37083	0.474087	-0.422653	7010	1.98835	1.22292	0.457495	12849	2.59512e-20
54	1.78914	0.962847	0.136556	19382	1.36389	0.459787	-0.444313	6825	2.00054	1.24126	0.481993	12557	3.7199e-24
55	1.78622	0.962931	0.139645	18666	1.35513	0.449541	-0.456045	6546	1.9999	1.24688	0.493865	12120	4.12369e-22
56	1.78217	0.960452	0.138738	18015	1.35521	0.448236	-0.458737	6291	1.99358	1.24348	0.493384	11724	8.23755e-22
57	1.78215	0.958004	0.133858	16283	1.35817	0.443254	-0.47166	5667	1.98989	1.24081	0.491722	10616	5.72973e-24
58	1.783	0.95823	0.13346	13430	1.36284	0.443026	-0.47679	4658	1.98688	1.23942	0.491961	8772	1.04518e-18
59	1.78082	0.952275	0.123729	10631	1.36135	0.432684	-0.495982	3677	1.98012	1.23209	0.484059	6954	7.39085e-16
60	1.76734	0.939744	0.112151	8035	1.35713	0.427817	-0.501494	2787	1.96102	1.21503	0.469029	5248	3.13811e-08

## Sheet: F
Figure 5F	Interface length deviation pre- and post neighbour exchange
Boundary interfaces prior to T1					Non-boundary interfaces after T1
Time relative to T1 transition (mins)	lower CI	Mean	upper CI	N	Time relative to T1 transition (mins)	lower CI	Mean	upper CI	N
-30	1.55704	0.952526	0.348012	854	0	2.42562	1.52082	0.616014	5422
-29.5	1.5494	0.949344	0.349288	1090	0.5	2.43317	1.53345	0.633734	6551
-29	1.53741	0.938191	0.338969	1328	1	2.43176	1.53728	0.642792	7692
-28.5	1.54645	0.945296	0.344139	1587	1.5	2.43019	1.54116	0.65213	8815
-28	1.56575	0.967169	0.368592	1649	2	2.44639	1.57288	0.699375	8133
-27.5	1.57631	0.979919	0.383528	1721	2.5	2.41782	1.55485	0.691888	7934
-27	1.58337	0.986753	0.390139	1798	3	2.40576	1.55314	0.700518	7812
-26.5	1.56628	0.976851	0.387418	1871	3.5	2.3856	1.543	0.700396	7640
-26	1.55526	0.966121	0.376983	1945	4	2.35943	1.52795	0.696474	7494
-25.5	1.53382	0.946399	0.358977	2031	4.5	2.34095	1.51988	0.698817	7331
-25	1.48361	0.901844	0.320082	2103	5	2.3166	1.50467	0.692744	7166
-24.5	1.44425	0.862169	0.280092	2178	5.5	2.29697	1.49262	0.688267	7005
-24	1.39926	0.816832	0.234399	2253	6	2.2834	1.48522	0.687038	6833
-23.5	1.35289	0.77212	0.191353	2322	6.5	2.26514	1.47574	0.686335	6689
-23	1.32091	0.740068	0.159229	2399	7	2.2532	1.47141	0.689626	6538
-22.5	1.26543	0.680463	0.095497	2482	7.5	2.24109	1.46357	0.686045	6407
-22	1.22958	0.640165	0.0507453	2571	8	2.22183	1.4497	0.677566	6256
-21.5	1.20674	0.61157	0.0164048	2663	8.5	2.20555	1.4369	0.668244	6106
-21	1.15826	0.560857	-0.0365434	2770	9	2.18473	1.42331	0.661899	5950
-20.5	1.12447	0.527265	-0.0699416	2883	9.5	2.16322	1.41002	0.656825	5795
-20	1.08122	0.483523	-0.114177	2999	10	2.1442	1.39793	0.651655	5628
-19.5	1.04687	0.444635	-0.1576	3122	10.5	2.11449	1.36915	0.62381	5489
-19	1.02078	0.420226	-0.180329	3252	11	2.0779	1.33848	0.599054	5327
-18.5	0.989079	0.389321	-0.210437	3376	11.5	2.04544	1.30996	0.574484	5168
-18	0.95349	0.348666	-0.256157	3512	12	2.01492	1.28462	0.55433	5013
-17.5	0.920996	0.309166	-0.302665	3645	12.5	1.9782	1.24724	0.516285	4873
-17	0.883883	0.263801	-0.35628	3782	13	1.94264	1.21208	0.481509	4723
-16.5	0.854752	0.227905	-0.398941	3935	13.5	1.90269	1.17242	0.442153	4575
-16	0.808802	0.177976	-0.452849	4092	14	1.8678	1.14018	0.41257	4422
-15.5	0.76002	0.120996	-0.518028	4251	14.5	1.85398	1.12527	0.396559	4284
-15	0.705052	0.0601818	-0.584688	4418	15	1.83598	1.10848	0.380984	4155
-14.5	0.653672	0.00575867	-0.642155	4598	15.5	1.81593	1.08946	0.362982	4026
-14	0.59609	-0.0550503	-0.70619	4788	16	1.81219	1.0915	0.370816	3892
-13.5	0.52394	-0.127169	-0.778277	4976	16.5	1.81296	1.09219	0.371417	3768
-13	0.44456	-0.209254	-0.863068	5162	17	1.81001	1.09287	0.375727	3654
-12.5	0.360378	-0.295825	-0.952027	5336	17.5	1.81521	1.10075	0.386282	3547
-12	0.279379	-0.377864	-1.03511	5519	18	1.80776	1.09781	0.387855	3444
-11.5	0.191518	-0.46541	-1.12234	5701	18.5	1.80483	1.09511	0.385395	3337
-11	0.0988755	-0.55638	-1.21164	5879	19	1.79796	1.08918	0.380405	3223
-10.5	0.0105582	-0.640634	-1.29183	6052	19.5	1.78059	1.06973	0.358874	3119
-10	-0.077215	-0.726253	-1.37529	6209	20	1.76559	1.05644	0.347289	3010
-9.5	-0.159266	-0.80717	-1.45507	6372	20.5	1.75215	1.03638	0.320616	2901
-9	-0.240756	-0.885684	-1.53061	6546	21	1.7325	1.0149	0.297291	2791
-8.5	-0.317742	-0.960403	-1.60306	6703	21.5	1.72519	1.00425	0.283299	2671
-8	-0.39537	-1.04136	-1.68735	6890	22	1.70172	0.983738	0.265762	2550
-7.5	-0.472076	-1.12231	-1.77254	7082	22.5	1.68902	0.973146	0.257276	2436
-7	-0.539556	-1.1969	-1.85425	7283	23	1.6891	0.970719	0.252342	2327
-6.5	-0.605101	-1.27022	-1.93534	7501	23.5	1.67368	0.95735	0.24102	2225
-6	-0.670262	-1.34208	-2.01389	7709	24	1.6638	0.953405	0.243008	2120
-5.5	-0.727763	-1.40912	-2.09048	7899	24.5	1.64282	0.935209	0.227594	2019
-5	-0.782053	-1.47558	-2.16911	8089	25	1.62821	0.920586	0.212961	1931
-4.5	-0.827429	-1.53264	-2.23785	8246	25.5	1.63468	0.919772	0.204867	1847
-4	-0.867516	-1.58442	-2.30133	8371	26	1.6521	0.937733	0.223365	1767
-3.5	-0.912355	-1.63978	-2.3672	8465	26.5	1.66681	0.949591	0.23237	1682
-3	-0.942132	-1.68129	-2.42045	8529	27	1.67714	0.948936	0.220735	1595
-2.5	-0.957877	-1.7095	-2.46111	8575	27.5	1.68804	0.950232	0.212423	1514
-2	-0.957074	-1.72265	-2.48822	8613	28	1.71157	0.963444	0.215319	1438
-1.5	-0.938901	-1.72306	-2.50721	8815	28.5	1.73184	0.976197	0.220556	1362
-1	-0.937018	-1.72749	-2.51797	7585	29	1.74388	0.985647	0.227412	1135
-0.5	-0.92946	-1.72725	-2.52504	6351	29.5	1.73327	0.961813	0.19036	919
0	-0.909501	-1.71574	-2.52198	5114	30	1.7193	0.941454	0.163609	715

## Sheet: G
Figure 5G	Proportion of interfaces (from S1 & S2 only)
Time after GBE onset (mins)	nonB	nonB-nonB	up to B-nonB	B-nonB	up to superB-nonB	superB-nonB	up to B-B	B-B	up to B	B
0	0.397948	0.397948	0.43723	0.437237	0.6123	0.6123	0.630233	0.630233	0.740395	1
0.5	0.397948	0.397948	0.43723	0.437237	0.6123	0.6123	0.630233	0.630233	0.740395	1
1	0.397948	0.397948	0.43723	0.437237	0.6123	0.6123	0.630233	0.630233	0.740395	1
1.5	0.397948	0.397948	0.43723	0.437237	0.6123	0.6123	0.630233	0.630233	0.740395	1
2	0.397948	0.397948	0.43723	0.437237	0.6123	0.6123	0.630233	0.630233	0.740395	1
2.5	0.397948	0.397948	0.43723	0.437237	0.6123	0.6123	0.630233	0.631742	0.740395	1
3	0.397948	0.397948	0.43723	0.437237	0.6123	0.6123	0.630233	0.631742	0.740395	1
3.5	0.397948	0.397948	0.43723	0.437237	0.6123	0.6123	0.630233	0.632748	0.740395	1
4	0.397948	0.397948	0.43723	0.437237	0.6123	0.6123	0.630233	0.633251	0.740395	1
4.5	0.397948	0.397948	0.43723	0.437237	0.6123	0.6123	0.630233	0.633754	0.740395	1
5	0.397948	0.397948	0.43723	0.439533	0.6123	0.6123	0.630233	0.633754	0.740395	1
5.5	0.397948	0.397948	0.43723	0.440107	0.6123	0.6123	0.630233	0.634257	0.740395	1
6	0.397948	0.397948	0.43723	0.441255	0.6123	0.6123	0.630233	0.634257	0.740395	1
6.5	0.397948	0.397948	0.43723	0.441829	0.6123	0.613355	0.630233	0.634257	0.740395	1
7	0.397948	0.397948	0.43723	0.442977	0.6123	0.61441	0.630233	0.634257	0.740395	1
7.5	0.397948	0.397948	0.43723	0.442977	0.6123	0.61441	0.630233	0.63476	0.740395	1
8	0.397948	0.397948	0.43723	0.443551	0.6123	0.61441	0.630233	0.635263	0.740395	1
8.5	0.397948	0.397948	0.43723	0.444125	0.6123	0.61441	0.630233	0.635263	0.740395	1
9	0.397948	0.398955	0.43723	0.444699	0.6123	0.61441	0.630233	0.635263	0.740395	1
9.5	0.397948	0.398955	0.43723	0.445273	0.6123	0.61441	0.630233	0.635766	0.740395	1
10	0.397948	0.398955	0.43723	0.446421	0.6123	0.61441	0.630233	0.635766	0.740395	1
10.5	0.397948	0.398955	0.43723	0.448143	0.6123	0.61441	0.630233	0.637275	0.740395	1
11	0.397948	0.398955	0.43723	0.448717	0.6123	0.61441	0.630233	0.637778	0.740395	1
11.5	0.397948	0.398955	0.43723	0.449864	0.6123	0.61441	0.630233	0.638784	0.740395	1
12	0.397948	0.398955	0.43723	0.451586	0.6123	0.615465	0.630233	0.639287	0.740395	1
12.5	0.397948	0.398955	0.43723	0.453882	0.6123	0.618629	0.630233	0.641803	0.740395	1
13	0.397948	0.398955	0.43723	0.4579	0.6123	0.620739	0.630233	0.642809	0.740395	1
13.5	0.397948	0.398955	0.43723	0.461344	0.6123	0.620739	0.630233	0.642809	0.740395	1
14	0.397948	0.399962	0.43723	0.464214	0.6123	0.620739	0.630233	0.645324	0.740395	1
14.5	0.397948	0.399962	0.43723	0.468232	0.6123	0.621794	0.630233	0.645324	0.740395	1
15	0.397948	0.399962	0.43723	0.47225	0.6123	0.624959	0.630233	0.645827	0.740395	1
15.5	0.397948	0.399962	0.43723	0.475119	0.6123	0.626014	0.630233	0.646833	0.740395	1
16	0.397948	0.399962	0.43723	0.476841	0.6123	0.626014	0.630233	0.647839	0.740395	1
16.5	0.397948	0.399962	0.43723	0.479711	0.6123	0.627068	0.630233	0.649348	0.740395	1
17	0.397948	0.400969	0.43723	0.483155	0.6123	0.627068	0.630233	0.649851	0.740395	1
17.5	0.397948	0.400969	0.43723	0.484303	0.6123	0.627068	0.630233	0.650857	0.740395	1
18	0.397948	0.400969	0.43723	0.490043	0.6123	0.627068	0.630233	0.653875	0.740395	1
18.5	0.397948	0.400969	0.43723	0.493487	0.6123	0.627068	0.630233	0.655887	0.740395	1
19	0.397948	0.400969	0.43723	0.498078	0.6123	0.627068	0.630233	0.656893	0.740395	1
19.5	0.397948	0.400969	0.43723	0.502096	0.6123	0.627068	0.630233	0.659911	0.740395	1
20	0.397948	0.403991	0.43723	0.50554	0.6123	0.627068	0.630233	0.662929	0.740395	1
20.5	0.397948	0.403991	0.43723	0.507836	0.6123	0.627068	0.630233	0.664942	0.740395	1
21	0.397948	0.403991	0.43723	0.509558	0.6123	0.627068	0.630233	0.667457	0.740395	1
21.5	0.397948	0.404998	0.43723	0.512428	0.6123	0.627068	0.630233	0.669469	0.740395	1
22	0.397948	0.404998	0.43723	0.516446	0.6123	0.627068	0.630233	0.670978	0.740395	1
22.5	0.397948	0.404998	0.43723	0.521038	0.6123	0.628123	0.630233	0.672487	0.740395	1
23	0.397948	0.404998	0.43723	0.522759	0.6123	0.628123	0.630233	0.674499	0.740395	1
23.5	0.397948	0.404998	0.43723	0.525055	0.6123	0.628123	0.630233	0.675002	0.740395	1
24	0.397948	0.406006	0.43723	0.527351	0.6123	0.629178	0.630233	0.677014	0.740395	1
24.5	0.397948	0.406006	0.43723	0.529073	0.6123	0.629178	0.630233	0.679026	0.740395	1
25	0.397948	0.406006	0.43723	0.531943	0.6123	0.629178	0.630233	0.680032	0.740395	1
25.5	0.397948	0.406006	0.43723	0.533665	0.6123	0.629178	0.630233	0.682044	0.740395	1
26	0.397948	0.407013	0.43723	0.536535	0.6123	0.629178	0.630233	0.684559	0.740395	1
26.5	0.397948	0.409027	0.43723	0.538831	0.6123	0.629178	0.630233	0.686571	0.740395	1
27	0.397948	0.409027	0.43723	0.544571	0.6123	0.629178	0.630233	0.687074	0.740395	1
27.5	0.397948	0.410035	0.43723	0.546293	0.6123	0.630233	0.630233	0.689087	0.740395	1
28	0.397948	0.411042	0.43723	0.54744	0.6123	0.630233	0.630233	0.68959	0.740395	1
28.5	0.397948	0.411042	0.43723	0.548588	0.6123	0.630233	0.630233	0.691602	0.740395	1
29	0.397948	0.411042	0.43723	0.549736	0.6123	0.630233	0.630233	0.691602	0.740395	1
29.5	0.397948	0.411042	0.43723	0.551458	0.6123	0.630233	0.630233	0.693111	0.740395	1
30	0.397948	0.411042	0.43723	0.55318	0.6123	0.630233	0.630233	0.694117	0.740395	1
30.5	0.397948	0.412049	0.43723	0.556624	0.6123	0.630233	0.630233	0.698141	0.740395	1
31	0.397948	0.413056	0.43723	0.558346	0.6123	0.630233	0.630233	0.699147	0.740395	1
31.5	0.397948	0.413056	0.43723	0.560068	0.6123	0.630233	0.630233	0.701662	0.740395	1
32	0.397948	0.413056	0.43723	0.562364	0.6123	0.630233	0.630233	0.702668	0.740395	1
32.5	0.397948	0.413056	0.43723	0.563512	0.6123	0.630233	0.630233	0.705686	0.740395	1
33	0.397948	0.414064	0.43723	0.565808	0.6123	0.630233	0.630233	0.706189	0.740395	1
33.5	0.397948	0.414064	0.43723	0.565808	0.6123	0.630233	0.630233	0.707195	0.740395	1
34	0.397948	0.414064	0.43723	0.56753	0.6123	0.630233	0.630233	0.707698	0.740395	1
34.5	0.397948	0.414064	0.43723	0.569252	0.6123	0.630233	0.630233	0.708201	0.740395	1
35	0.397948	0.414064	0.43723	0.5704	0.6123	0.630233	0.630233	0.712728	0.740395	1
35.5	0.397948	0.414064	0.43723	0.570974	0.6123	0.630233	0.630233	0.714238	0.740395	1
36	0.397948	0.414064	0.43723	0.572695	0.6123	0.630233	0.630233	0.715244	0.740395	1
36.5	0.397948	0.414064	0.43723	0.573843	0.6123	0.630233	0.630233	0.717256	0.740395	1
37	0.397948	0.414064	0.43723	0.576139	0.6123	0.630233	0.630233	0.718262	0.740395	1
37.5	0.397948	0.416078	0.43723	0.577287	0.6123	0.630233	0.630233	0.720274	0.740395	1
38	0.397948	0.416078	0.43723	0.578435	0.6123	0.630233	0.630233	0.722789	0.740395	1
38.5	0.397948	0.4191	0.43723	0.578435	0.6123	0.630233	0.630233	0.722789	0.740395	1
39	0.397948	0.420107	0.43723	0.579009	0.6123	0.630233	0.630233	0.723795	0.740395	1
39.5	0.397948	0.420107	0.43723	0.583027	0.6123	0.630233	0.630233	0.724801	0.740395	1
40	0.397948	0.420107	0.43723	0.583601	0.6123	0.630233	0.630233	0.725807	0.740395	1
40.5	0.397948	0.420107	0.43723	0.585323	0.6123	0.630233	0.630233	0.726813	0.740395	1
41	0.397948	0.421114	0.43723	0.586471	0.6123	0.630233	0.630233	0.726813	0.740395	1
41.5	0.397948	0.422122	0.43723	0.587045	0.6123	0.630233	0.630233	0.727819	0.740395	1
42	0.397948	0.423129	0.43723	0.589341	0.6123	0.630233	0.630233	0.728322	0.740395	1
42.5	0.397948	0.423129	0.43723	0.591063	0.6123	0.630233	0.630233	0.729328	0.740395	1
43	0.397948	0.423129	0.43723	0.592785	0.6123	0.630233	0.630233	0.73134	0.740395	1
43.5	0.397948	0.424136	0.43723	0.593359	0.6123	0.630233	0.630233	0.732346	0.740395	1
44	0.397948	0.42615	0.43723	0.596228	0.6123	0.630233	0.630233	0.732346	0.740395	1
44.5	0.397948	0.427158	0.43723	0.597376	0.6123	0.630233	0.630233	0.732346	0.740395	1
45	0.397948	0.428165	0.43723	0.599098	0.6123	0.630233	0.630233	0.732346	0.740395	1
45.5	0.397948	0.428165	0.43723	0.601968	0.6123	0.630233	0.630233	0.732849	0.740395	1
46	0.397948	0.429172	0.43723	0.603116	0.6123	0.630233	0.630233	0.734358	0.740395	1
46.5	0.397948	0.431187	0.43723	0.603116	0.6123	0.630233	0.630233	0.734358	0.740395	1
47	0.397948	0.432194	0.43723	0.60369	0.6123	0.630233	0.630233	0.734358	0.740395	1
47.5	0.397948	0.432194	0.43723	0.604838	0.6123	0.630233	0.630233	0.735364	0.740395	1
48	0.397948	0.432194	0.43723	0.605986	0.6123	0.630233	0.630233	0.736873	0.740395	1
48.5	0.397948	0.433201	0.43723	0.607708	0.6123	0.630233	0.630233	0.737879	0.740395	1
49	0.397948	0.434208	0.43723	0.608282	0.6123	0.630233	0.630233	0.737879	0.740395	1
49.5	0.397948	0.434208	0.43723	0.610004	0.6123	0.630233	0.630233	0.737879	0.740395	1
50	0.397948	0.434208	0.43723	0.610578	0.6123	0.630233	0.630233	0.738383	0.740395	1

## Sheet: 5G' Statistics 
Figure 5G' - Statistical analysis
Two-sample Kolmogorov-Smirnov Tests: Events vs. Orientation @-2.5 to T1 transition
B-nonB vs. nonB-nonB				B-nonB	nonB-nonB	B-B	superB-nonB	Total
p	0.171		N	580	39	219	17	580
D	0.184
Point of max. difference (˚)	72.5
B-nonB vs. B-B
p	1e-06
D	0.237
Point of max. difference (˚)	67.5
B-nonB vs. superB-nonB
p	0.173
D	0.266
Point of max. difference (˚)	62.5

## Sheet: 5G'' Statistics
Figure 5G" - Statistical analysis
Two-sample Kolmogorov-Smirnov Tests: Exchange events vs. Time
B-nonB vs. nonB-nonB				B-nonB	nonB-nonB	B-B	superB-nonB	Total
p	0.000367		N	302	36	215	17	570
D	0.357
Time of max. difference (mins)	37
B-nonB vs. B-B
p	0.121
D	0.104
Time of max. difference (mins)	19
B-nonB vs. superB-nonB
p	0.00019
D	0.578
Time of max. difference (mins)	16.5

## Sheet: I
Figure 5I	Freqency of the different types of interface vs AP within-stripe coordinates (from S1 & S2 only)
Within-stripe AP coordinate (normalised, 0-1)	nonB	B-nonB	BB	B
0.05	343.672	892.507	3585.74	8168.1
0.15	1549.37	2811.04	907.24	2752.14
0.25	3430.63	2631.39	233.679	622.5
0.35	4981.96	1462.97	48.0896	123.716
0.45	7330.58	457.525	4.90085	22.5746
0.55	7121.4	415.317	14.7332	22.5746
0.65	6024.71	1284.3	92.3198	145.31
0.75	4151.27	2205.26	199.312	542.953
0.85	1579.82	3213.64	1416.84	2991.73
0.95	242.531	1747.68	3620.11	8168.1

## Sheet: J
Figure 5J	Evolution of mean interface orientation vs interface length for different interface types
B		B-B				B-nonB				nonB
		Before T1		After T1		Before T1		After T1
Length (µm)	Orientation (deg.)	Length (µm)	Orientation (deg.)	Length (µm)	Orientation (deg.)	Length (µm)	Orientation (deg.)	Length (µm)	Orientation (deg.)	Length (µm)	Orientation (deg.)
5.44801	52.817	5.7906	59.7637	0.924085	35.5334	6.01605	65.4466	0.823695	23.6506	5.06861	36.8455
5.68394	54.1546	5.91341	62.109	1.44403	38.9175	6.03182	66.3913	1.31844	25.8188	5.11017	37.6274
5.98479	56.833	6.0493	64.7927	1.95714	40.3231	5.9713	66.6423	1.72442	27.3386	5.19651	38.9731
6.13216	58.0935	5.88496	65.0428	2.36592	41.1801	6.00422	67.1345	2.11229	27.2253	5.42167	40.3565
6.14032	58.3794	6.00317	65.7443	2.68697	43.2631	5.87006	66.9429	2.45818	27.4049	5.55499	41.0016
6.16037	58.6441	5.86479	65.8343	3.09584	45.3924	5.73701	68.0501	2.76772	28.9111	5.61856	41.0262
6.15425	59.6453	5.80845	66.2236	3.50885	45.597	5.79993	69.9478	3.06046	29.3359	5.83429	41.3511
6.29184	59.9204	5.54097	66.0817	3.77352	47.2544	5.85162	70.7852	3.39546	30.5325	6.04262	41.8482
6.18212	60.8119	5.38055	67.0087	4.00562	48.2815	5.55344	69.8599	3.54786	31.4667	6.21721	42.0394
6.12174	62.3701	5.03963	66.8535	4.26323	49.3831	5.33711	71.1417	3.88787	31.5524	6.34824	42.2406
6.14702	63.5895	4.73337	66.482	4.84956	51.3117	5.06849	71.6557	4.09793	30.5503	6.46631	43.0095
6.23012	64.8226	4.35935	67.4474	4.98253	53.2735	4.72556	72.13	4.39357	32.132	6.51437	43.8302
6.18223	65.5328	3.93499	67.6782	5.29538	55.2866	4.35561	73.1667	4.61785	33.043	6.51615	44.1395
6.20044	66.2556	3.60461	66.67	5.32544	57.4078	4.01879	73.2519	4.62042	33.5238	6.5629	44.9776
6.3399	67.4986	3.25805	67.5014	5.40396	59.1263	3.58515	73.3714	4.92347	35.6983	6.59518	45.3331
6.25216	68.3388	2.80337	66.9945	5.34581	59.9808	3.16301	73.9622	4.75397	35.9225	6.57636	45.8526
6.07974	69.3938	2.4014	66.4794	5.62225	61.6501	2.5979	73.6335	4.97641	35.5411	6.51858	46.0469
6.17114	69.9612	1.87858	65.3607	N/A	N/A	1.97575	73.0862	5.26409	34.5221	6.52546	46.4234
6.01631	70.5188	1.37499	65.3886	N/A	N/A	1.49777	72.7575	5.4354	34.0011	6.52198	46.8452
5.80543	70.4949	1.0785	65.8356	N/A	N/A	1.00112	71.7956	5.34153	33.5152	6.48174	47.4371
