# Supplementary material for: Unipolar distributions of junctional Myosin II identify cell stripe boundaries that drive cell intercalation throughout Drosophila axis extension
Source: eLife journal article supplement (doi:10.7554/elife.12094), 2016-05-16
Supplement: supp [file elife-12094-supp-v1.zip › elife_poa_e12094_Figure_5_source_data_2.xlsx]

## Sheet: C
Figure 5-figure supplement 1C: Interface Myosin II f.i. vs Time (stripe boundary interfaces)
	0-30 deg (AP-oriented)				30-60 deg				0-30 vs 30-60	60-90 deg (DV-oriented)				60-90 vs 30-60
Time after GBE onset (mins)	lower CI	Mean	upper CI	N	lower CI	Mean	upper CI	N	P-value	lower CI	Mean	upper CI	N	P-value
-20	0.964919	3.05836	5.15181	693	1.02805	3.00892	4.9898	2089	0.0152487	0.882027	2.76858	4.65514	2089	0.914945
-19	1.05844	3.15768	5.25693	884	1.09867	3.0867	5.07472	2595	0.334292	0.961118	2.83984	4.71856	2643	0.426311
-18	0.814828	2.73343	4.65203	1105	0.861007	2.64549	4.42998	3104	0.388738	0.735861	2.41608	4.09631	3282	0.341179
-17	0.897599	2.82044	4.74327	1322	0.917201	2.71606	4.51491	3634	0.765383	0.814152	2.50249	4.19082	3917	0.00629523
-16	2.38593	4.25271	6.11949	1438	2.02335	3.7859	5.54845	3938	0.395227	1.89263	3.55513	5.21764	4346	0.102635
-15	2.44152	4.37622	6.31091	1519	2.08452	3.9128	5.74109	4241	0.071029	2.00478	3.75265	5.50051	4785	0.152974
-14	2.61564	4.67756	6.73948	1602	2.32551	4.22487	6.12423	4541	0.078206	2.20044	4.04601	5.89157	5207	0.364347
-13	2.8542	5.02673	7.19927	1683	2.54926	4.5186	6.48794	4862	0.0050404	2.39895	4.32999	6.26103	5639	0.543083
-12	3.07461	5.3173	7.56	1748	2.77487	4.8124	6.84993	5202	0.0305018	2.62844	4.63336	6.63828	6089	0.538334
-11	3.34942	5.65592	7.96242	1773	3.04447	5.16277	7.28106	5517	0.000739817	2.92486	5.02595	7.12704	6478	0.243614
-10	3.55214	5.89221	8.23227	1795	3.25934	5.4207	7.58206	5826	0.00030553	3.1995	5.3459	7.49229	6895	0.20091
-9	3.89824	6.26487	8.63151	1769	3.51066	5.72454	7.93843	5857	0.0374306	3.51114	5.71425	7.91736	7044	0.232737
-8	4.21941	6.6608	9.10218	1766	3.8389	6.107	8.3751	5909	0.0725658	3.84895	6.11059	8.37222	7188	0.469809
-7	4.39933	6.83268	9.26603	1746	4.02986	6.35441	8.67897	5911	0.0772753	4.18875	6.51356	8.83836	7391	0.405236
-6	4.5937	7.06883	9.54397	1728	4.27166	6.67744	9.08323	5865	0.00891924	4.5743	6.94957	9.32485	7610	0.103201
-5	4.83391	7.39971	9.96552	1688	4.52994	7.03001	9.53008	5858	0.0166512	4.95729	7.42982	9.90235	7828	0.532194
-4	5.11245	7.72681	10.3412	1676	4.8104	7.38942	9.96844	5847	0.601061	5.37065	7.96294	10.5552	8139	0.0203032
-3	5.63987	8.42885	11.2178	1650	5.31568	8.03164	10.7476	5836	0.579369	6.13716	8.98872	11.8403	8579	0.158837
-2	6.13689	9.14857	12.1603	1602	5.93955	8.79128	11.643	5894	0.207739	7.04907	10.1127	13.1764	9133	0.115668
-1	6.85762	9.98559	13.1136	1557	6.62058	9.69036	12.7601	5933	0.740012	8.10049	11.4459	14.7913	9810	0.0415955
0	7.6395	10.9377	14.2359	1503	7.36186	10.6001	13.8384	6039	0.154356	9.2019	12.9118	16.6218	10590	1.34e-06
1	8.38036	11.7255	15.0707	1429	8.13433	11.5688	15.0033	6212	0.000773533	10.3775	14.4264	18.4753	11472	4.02e-11
2	9.31026	12.7584	16.2065	1394	9.19559	12.8504	16.5052	6382	0.143771	11.7763	16.199	20.6218	12501	1.78e-14
3	10.5644	14.1904	17.8164	1313	10.197	14.0738	17.9506	6583	0.422986	13.2313	17.9463	22.6614	13550	1.05e-22
4	11.5764	15.3047	19.033	1243	11.2151	15.3833	19.5514	6825	0.192918	14.6552	19.6842	24.7132	14573	1.56e-25
5	12.4515	16.3768	20.3021	1200	12.2447	16.6865	21.1283	7088	0.801118	16.0755	21.405	26.7345	15602	1.81e-28
6	13.3321	17.386	21.4399	1126	13.3205	18.0555	22.7905	7423	0.139433	17.4235	23.057	28.6904	16554	7.65e-31
7	14.3038	18.325	22.3462	1085	14.3433	19.3008	24.2584	7749	0.843864	18.7237	24.5548	30.3858	17468	7.13e-27
8	15.5472	19.7628	23.9783	1056	15.4945	20.8652	26.2359	8087	0.871609	20.052	26.1378	32.2236	18266	4.55e-36
9	16.6201	21.0799	25.5398	1045	16.3637	22.0805	27.7973	8476	0.08972	21.0515	27.3253	33.5991	18888	1.39e-32
10	17.0715	21.8281	26.5847	1082	17.2061	23.173	29.1399	8854	0.013035	22.0268	28.5121	34.9975	19430	1.61e-35
11	17.3454	22.5736	27.8017	1159	17.8788	24.0256	30.1724	9201	0.043008	22.8041	29.4765	36.1489	19871	1.1e-23
12	17.3147	22.9999	28.6851	1230	18.6373	25.0948	31.5524	9449	0.456451	23.4899	30.289	37.0881	20296	9.68e-25
13	17.5377	23.584	29.6302	1290	19.2697	25.8837	32.4977	9731	0.0884959	24.1593	31.1315	38.1036	20634	2.41e-29
14	17.7279	23.9395	30.1512	1336	19.8988	26.7076	33.5164	10054	0.0431479	24.7625	31.8914	39.0202	20910	2.76e-28
15	17.7108	24.1659	30.621	1388	20.4978	27.5171	34.5364	10313	0.00343841	25.2388	32.554	39.8692	21111	1.05e-14
16	17.6814	24.2143	30.7472	1425	21.1733	28.3306	35.4879	10443	0.0204728	25.7818	33.301	40.8202	21378	5.61e-32
17	18.2232	24.9606	31.698	1432	21.8555	29.1447	36.4339	10678	1.58e-05	26.2749	33.9855	41.6961	21583	4.45e-25
18	18.8446	25.7695	32.6944	1428	22.413	29.8466	37.2803	10845	4.49e-05	26.7696	34.7452	42.7209	21897	1.14e-15
19	19.741	26.7295	33.7181	1429	22.9653	30.4934	38.0215	11066	4.65e-08	27.192	35.3603	43.5286	22078	8.7e-17
20	20.6089	27.8166	35.0243	1474	23.6425	31.3305	39.0184	11153	0.00144793	27.5604	35.8915	44.2226	22319	5.78e-18
21	21.8332	29.4689	37.1045	1515	24.5704	32.4915	40.4126	11164	0.168188	27.9963	36.4851	44.974	22448	5.11e-21
22	22.8704	30.7231	38.5757	1553	25.1005	33.1472	41.1939	11167	0.0747517	28.2481	36.8149	45.3817	22584	2.29e-09
23	24.3229	32.5053	40.6877	1579	25.6753	33.9567	42.2381	11220	0.117636	28.531	37.223	45.9149	22704	1.96e-09
24	25.4538	33.9983	42.5429	1593	26.1622	34.7374	43.3126	11301	0.169968	28.7299	37.4716	46.2133	22726	0.0117366
25	26.0706	34.6434	43.2161	1576	26.6592	35.5046	44.35	11319	0.378112	28.944	37.7258	46.5077	22712	0.000357744
26	26.708	35.3703	44.0326	1555	27.2922	36.3815	45.4707	11315	0.882734	29.3899	38.2875	47.1851	22632	0.00268332
27	27.1727	36.0252	44.8777	1522	27.7846	37.1234	46.4621	11359	0.157432	29.8103	38.7834	47.7566	22398	0.0137916
28	27.396	36.2224	45.0488	1471	28.0401	37.5189	46.9976	11352	0.0373335	30.1908	39.2772	48.3636	22174	0.00151219
29	27.6439	36.6864	45.729	1432	28.4944	38.1791	47.8639	11270	0.0447706	30.7008	39.9005	49.1002	22014	0.0247482
30	27.66	36.8038	45.9477	1400	28.9988	38.7627	48.5266	11171	0.469031	31.2298	40.4906	49.7514	21745	0.00647404
31	27.7396	36.7604	45.7812	1416	29.7296	39.5779	49.4262	10947	0.138366	31.7381	41.1098	50.4816	21518	0.0103268
32	28.4434	37.6062	46.769	1412	30.4261	40.3243	50.2224	10827	0.33405	32.3094	41.7381	51.1667	21168	0.013565
33	29.1393	38.7992	48.459	1391	30.8509	40.8117	50.7725	10655	0.0426417	32.6988	42.171	51.6431	20910	0.0770544
34	30.2456	40.1584	50.0712	1391	31.5887	41.6985	51.8082	10365	0.003361	33.2139	42.7827	52.3514	20715	0.576861
35	31.002	41.2254	51.4488	1399	32.2695	42.5822	52.895	10174	0.180348	33.8075	43.4228	53.038	20583	0.0353986
36	31.4321	41.8638	52.2955	1419	32.9502	43.263	53.5758	10010	0.225516	34.2286	43.8738	53.519	20404	0.0746448
37	31.9633	42.2878	52.6123	1427	33.2937	43.6789	54.064	9909	0.820628	34.3878	44.0756	53.7634	20214	0.97799
38	31.9734	42.3857	52.798	1381	33.7359	44.2002	54.6645	9745	0.283644	34.6735	44.4454	54.2172	19982	0.620536
39	31.8226	42.3848	52.9469	1366	34.2056	44.7982	55.3908	9560	0.39385	34.8608	44.6903	54.5198	19648	0.435933
40	31.2179	41.5246	51.8313	1360	34.8216	45.535	56.2484	9341	0.0558833	35.1274	45.0286	54.9298	19286	0.45821
41	30.3772	40.5315	50.6859	1343	34.7467	45.5474	56.3482	9175	7.81e-06	34.9443	44.8734	54.8024	18948	0.984172
42	29.556	39.7184	49.8809	1355	34.7453	45.5762	56.407	8982	0.00606038	34.7405	44.7395	54.7384	18499	0.455396
43	29.279	39.2819	49.2849	1332	34.6327	45.6203	56.608	8799	0.000161093	34.4202	44.4852	54.5503	18012	0.210261
44	29.2093	39.811	50.4127	1317	34.7507	45.8078	56.865	8568	0.00155784	34.3834	44.4847	54.586	17636	0.450333
45	29.8917	40.6397	51.3877	1343	34.3502	45.4372	56.5242	8385	1.2e-05	34.1721	44.2186	54.2651	17282	0.42317
46	30.2573	41.319	52.3808	1339	34.1561	45.2441	56.3322	8208	0.00265728	33.8496	43.9165	53.9834	17027	0.081782
47	29.7358	40.9025	52.0691	1295	33.8621	44.8792	55.8963	8069	0.435676	33.4449	43.4945	53.5442	16723	0.323681
48	29.8011	40.9946	52.1881	1243	34.1322	45.0381	55.9441	7973	0.386015	33.275	43.3786	53.4823	16393	0.763216
49	30.4217	41.511	52.6004	1195	33.885	44.6648	55.4447	7764	0.54597	33.0019	43.1258	53.2497	16093	0.0681672
50	30.0462	41.2357	52.4252	1146	33.6576	44.3479	55.0382	7623	7.47e-05	32.7406	42.8607	52.9808	15774	0.0296795
51	29.8436	40.606	51.3684	1101	33.6779	44.4084	55.1388	7448	0.000176779	32.5014	42.7046	52.9077	15425	0.00578635
52	30.1983	41.0005	51.8028	1036	33.5285	44.1976	54.8668	7248	0.204363	32.3115	42.6692	53.0269	15081	0.703823
53	29.6514	40.2698	50.8882	1019	33.4339	44.1291	54.8243	7015	0.164124	32.3255	42.7781	53.2308	14584	0.324823
54	30.0248	40.6646	51.3044	1012	33.1682	43.9034	54.6385	6774	0.00748122	32.3096	42.868	53.4263	14057	0.0110794
55	30.1318	40.8066	51.4815	1013	32.8636	43.6303	54.3971	6416	0.0180526	32.2466	42.8425	53.4384	13500	0.0844193
56	29.613	40.0654	50.5178	999	32.9763	43.9175	54.8587	6167	0.49706	32.1937	42.8502	53.5068	12957	0.612322
57	29.4773	39.8636	50.2499	933	33.2842	44.2363	55.1884	5485	0.186355	32.5045	43.2927	54.0809	11692	0.682674
58	29.2088	39.6487	50.0885	784	33.0196	43.9599	54.9003	4510	0.0027906	32.5758	43.3954	54.215	9616	0.0981412
59	28.2602	38.6036	48.947	642	33.4558	44.5443	55.6327	3573	5.35e-06	32.6677	43.4693	54.2709	7616	0.0130264
60	27.8259	37.7637	47.7015	483	33.4121	44.4499	55.4877	2686	0.0062758	32.6098	43.3983	54.1869	5796	0.415224

## Sheet: C dash
Figure 5-figure supplement 1C': Interface Myosin II f.i. vs Time (stripe non-boundary interfaces)
	0-30 deg (AP-oriented)				30-60 deg				0-30 vs 30-60	60-90 deg (DV-oriented)				60-90 vs 30-60
Time after GBE onset (mins)	lower CI	Mean	upper CI	N	lower CI	Mean	upper CI	N	P-value	lower CI	Mean	upper CI	N	P-value
-20	1.17392	3.25007	5.32622	1504	1.04738	3.12689	5.20641	1481	0.571138	1.33162	3.47772	5.62382	581	0.0493393
-19	1.23894	3.31628	5.39363	1898	1.12249	3.17372	5.22495	1845	0.778969	1.40405	3.54623	5.68841	739	0.128402
-18	1.0214	2.89302	4.76464	2314	0.944586	2.77462	4.60465	2242	0.0831393	1.20611	3.11918	5.03225	906	0.0363735
-17	1.09109	2.99521	4.89932	2738	0.98355	2.83015	4.67675	2655	0.231577	1.39511	3.33811	5.28111	1067	0.0106402
-16	2.21041	4.0352	5.85999	3032	2.09337	3.8609	5.62844	2869	0.227525	2.19814	3.98297	5.7678	1147	0.00816844
-15	2.34477	4.22223	6.09968	3273	2.18918	4.01672	5.84426	3116	0.0403191	2.26542	4.05729	5.84916	1234	0.0362682
-14	2.54226	4.49725	6.45224	3514	2.36717	4.249	6.13082	3349	0.172529	2.50187	4.37065	6.23942	1332	0.0873157
-13	2.78066	4.77147	6.76228	3772	2.56808	4.5493	6.53052	3579	0.562744	2.77647	4.67373	6.571	1426	0.413505
-12	3.04206	5.09915	7.15624	4034	2.74734	4.79596	6.84458	3814	0.337714	3.06271	5.01209	6.96147	1514	0.605347
-11	3.2883	5.3973	7.50629	4269	3.02363	5.14569	7.26775	4004	0.0281353	3.40276	5.39607	7.38938	1629	0.0961218
-10	3.5032	5.61889	7.73457	4513	3.2744	5.44382	7.61325	4177	0.19384	3.62195	5.62903	7.6361	1748	0.582423
-9	3.75918	5.92865	8.09811	4536	3.573	5.78758	8.00217	4176	0.192015	3.95098	6.02333	8.09569	1828	0.192139
-8	3.95657	6.19576	8.43494	4585	3.92129	6.17735	8.43341	4167	0.23939	4.23714	6.35977	8.48241	1901	0.951793
-7	4.10369	6.38835	8.67301	4569	4.18779	6.49777	8.80774	4217	0.00317097	4.43454	6.57388	8.71321	1969	0.16806
-6	4.25544	6.61182	8.9682	4540	4.40304	6.77376	9.14448	4236	0.13245	4.68354	6.82877	8.97401	2045	0.894888
-5	4.43994	6.86822	9.2965	4478	4.698	7.13345	9.5689	4284	0.148505	5.03141	7.2322	9.433	2158	0.719137
-4	4.61289	7.13023	9.64757	4429	5.00882	7.50566	10.0025	4374	0.116338	5.41031	7.69352	9.97673	2254	0.497652
-3	5.03373	7.63947	10.2452	4421	5.46109	8.06782	10.6746	4511	0.0397179	6.04661	8.52903	11.0115	2375	0.340837
-2	5.53915	8.22556	10.912	4451	5.94709	8.71233	11.4776	4699	0.0594153	6.73213	9.38017	12.0282	2548	0.29291
-1	6.07185	8.84335	11.6148	4497	6.43094	9.34367	12.2564	4943	0.0219879	7.48599	10.2593	13.0326	2750	0.5094
0	6.6552	9.54057	12.4259	4615	6.96714	10.02	13.0729	5158	0.00559219	8.32622	11.3516	14.377	3046	0.00204021
1	7.18819	10.1355	13.0828	4715	7.54212	10.7215	13.9009	5501	0.0409408	9.12894	12.3288	15.5288	3383	0.0135817
2	7.85899	10.8959	13.9328	4887	8.29656	11.6013	14.9061	5896	0.222805	10.0971	13.492	16.8869	3709	0.000539072
3	8.59008	11.7231	14.856	5082	8.93991	12.4182	15.8965	6355	0.72891	11.1202	14.8068	18.4933	4040	1.42e-07
4	9.43294	12.752	16.071	5263	9.64644	13.2549	16.8634	6848	0.0259072	12.1905	16.1433	20.0962	4442	1.7e-06
5	10.3197	13.8278	17.3358	5477	10.2173	14.0258	17.8344	7412	0.0321953	13.1538	17.363	21.5721	4799	6.61e-11
6	11.2677	14.9445	18.6214	5710	10.9339	14.9298	18.9257	8013	0.630393	14.1442	18.552	22.9597	5181	1.05e-19
7	12.1551	15.9987	19.8423	5964	11.5792	15.7152	19.8512	8695	0.0837795	15.0471	19.6918	24.3365	5546	2.12e-24
8	13.2051	17.3047	21.4043	6321	12.2589	16.5331	20.8073	9367	0.0515959	16.0025	20.8613	25.72	5901	4.71e-21
9	13.9271	18.2411	22.5551	6643	12.769	17.1861	21.6032	10097	0.0539528	16.6865	21.8081	26.9296	6270	1.66e-20
10	14.7274	19.2705	23.8136	7007	13.4126	18.0456	22.6785	10801	0.000348353	17.3568	22.7301	28.1035	6677	9.05e-27
11	15.2713	20.0161	24.7608	7433	13.9027	18.7514	23.6001	11400	3.66e-07	17.7544	23.3271	28.8998	7063	2.23e-25
12	15.7767	20.6943	25.612	7812	14.3321	19.2812	24.2303	12050	0.00222696	18.279	24.021	29.7629	7523	1.82e-29
13	16.321	21.3342	26.3474	8288	14.7366	19.8584	24.9801	12719	0.0112365	18.7932	24.7255	30.6578	7933	6.87e-23
14	16.6574	21.7507	26.8441	8804	15.169	20.3945	25.62	13405	0.0806272	19.1219	25.2217	31.3214	8350	8.02e-15
15	16.9081	22.1727	27.4373	9331	15.6255	20.967	26.3084	14035	0.000163774	19.3663	25.639	31.9116	8847	2.63e-30
16	17.384	22.7251	28.0663	9914	16.0393	21.5319	27.0244	14682	0.000861791	19.6802	26.1257	32.5711	9311	1.47e-28
17	17.6318	23.0861	28.5404	10545	16.3736	21.9699	27.5662	15381	0.0524925	19.7906	26.3312	32.8718	9780	4.2e-24
18	17.9581	23.489	29.0198	11144	16.5801	22.2351	27.8901	16226	0.0168293	19.9751	26.6073	33.2395	10302	3.56e-17
19	18.2491	23.8691	29.4891	11830	16.7771	22.5151	28.253	17026	0.00222881	19.9691	26.6624	33.3557	10836	1.66e-23
20	18.3987	24.1939	29.9891	12492	17.0781	22.9052	28.7323	17701	0.0434848	19.8665	26.6202	33.3739	11456	9.91e-14
21	18.7856	24.7403	30.695	13130	17.3078	23.2201	29.1325	18313	5.49e-05	19.9682	26.8093	33.6503	12043	7.12e-19
22	19.036	25.0148	30.9937	13722	17.4979	23.5037	29.5095	18977	5.73e-06	19.9373	26.8858	33.8342	12515	6.86e-14
23	19.2139	25.2569	31.2999	14368	17.7117	23.7316	29.7514	19641	0.0197083	19.898	26.8304	33.7629	13009	7.83e-06
24	19.4194	25.6089	31.7985	14977	17.8251	23.8978	29.9706	20245	1.69e-07	19.9175	26.8181	33.7188	13536	1.91e-12
25	19.5076	25.9122	32.3167	15613	18.0324	24.2379	30.4434	20773	0.0134966	19.9052	26.8102	33.7152	14007	1.41e-07
26	19.8816	26.477	33.0723	16210	18.413	24.7156	31.0182	21224	5.63e-05	20.0534	27.0476	34.0418	14380	1.31e-09
27	20.2607	26.984	33.7073	16736	18.6026	24.9778	31.3531	21771	3.38e-07	20.2007	27.2295	34.2583	14741	1.91e-07
28	20.5742	27.4372	34.3003	17267	18.9042	25.3614	31.8185	22182	0.000183542	20.3324	27.3722	34.4121	15092	0.00108366
29	20.9036	27.9199	34.9361	17776	19.125	25.692	32.259	22531	3.96e-09	20.6493	27.6598	34.6704	15426	0.000104113
30	21.3714	28.5433	35.7152	18168	19.4016	26.1252	32.8488	22840	1.66e-10	20.9136	27.9995	35.0854	15707	9.6e-05
31	21.797	29.0633	36.3296	18474	19.8412	26.661	33.4809	23094	2.58e-10	21.3033	28.5069	35.7105	16031	0.000181795
32	22.3415	29.6566	36.9716	18754	20.2827	27.2142	34.1458	23306	7.77e-07	21.7187	29.0419	36.3651	16232	0.000126435
33	22.599	30.0103	37.4215	18966	20.5214	27.5519	34.5824	23510	3.12e-12	22.0825	29.4815	36.8805	16465	5.66e-06
34	23.0197	30.5623	38.105	19169	21.008	28.1419	35.2757	23576	4.16e-06	22.5844	30.0576	37.5308	16710	6.14e-06
35	23.4713	31.1216	38.772	19408	21.3889	28.6197	35.8505	23768	4.24e-06	23.1187	30.6702	38.2217	16922	0.00166778
36	23.9141	31.6182	39.3222	19575	21.7604	29.09	36.4196	23992	2.65e-10	23.5919	31.2543	38.9166	17168	2.43e-08
37	24.1928	31.9835	39.7742	19720	21.9597	29.3478	36.7359	24084	2.31e-09	23.8706	31.5984	39.3261	17478	0.000312215
38	24.5625	32.3761	40.1896	19805	21.984	29.453	36.922	24035	1.32e-13	24.1403	31.9503	39.7602	17558	5.18e-08
39	24.7573	32.6862	40.6151	19751	21.9714	29.4694	36.9673	23981	3.95e-08	24.2034	32.0776	39.9518	17649	3.44e-08
40	24.979	32.9432	40.9073	19637	22.0285	29.5411	37.0537	23832	1.39e-15	24.3172	32.2266	40.136	17670	1.88e-08
41	24.8165	32.8444	40.8724	19502	21.8141	29.4027	36.9912	23669	2.88e-18	24.1749	32.1917	40.2085	17589	5.04e-16
42	24.6376	32.7483	40.859	19208	21.6834	29.4253	37.1672	23399	2.16e-14	23.9536	32.048	40.1424	17502	1.44e-06
43	24.362	32.6172	40.8724	18857	21.476	29.2437	37.0114	23078	2.94e-16	23.5159	31.636	39.7561	17269	2.95e-12
44	24.1105	32.4042	40.698	18454	21.5351	29.3708	37.2065	22760	3.11e-08	23.4049	31.4901	39.5753	17011	6.88e-06
45	23.797	32.2196	40.6423	18109	21.5153	29.4348	37.3543	22462	2.33e-05	23.0317	31.1338	39.2358	16901	0.0225943
46	23.611	32.0876	40.5642	17824	21.5566	29.5872	37.6178	22091	3.02e-08	22.8074	30.9076	39.0078	16794	0.00681932
47	23.512	32.1038	40.6957	17520	21.5915	29.7743	37.9571	21714	0.0241345	22.6634	30.7306	38.7978	16615	0.269144
48	23.7435	32.4847	41.226	17149	21.707	29.9613	38.2155	21362	4.08e-06	22.6338	30.7007	38.7675	16434	0.0223494
49	23.72	32.5026	41.2853	16767	21.6056	29.844	38.0825	21006	0.00591053	22.4626	30.4163	38.37	16212	0.514157
50	23.8162	32.5883	41.3603	16390	21.5648	29.8208	38.0768	20603	5e-06	22.4697	30.3836	38.2975	16037	0.0900407
51	23.9818	32.8668	41.7518	16040	21.4603	29.7662	38.0722	20164	1.93e-10	22.3895	30.3301	38.2707	15867	0.102686
52	24.108	33.151	42.194	15680	21.4506	29.7532	38.0559	19716	6.4e-08	22.3814	30.3654	38.3494	15580	0.904678
53	24.2952	33.3788	42.4625	15195	21.394	29.647	37.9	19150	5.55e-09	22.478	30.4744	38.4709	15230	0.0210385
54	24.3434	33.3989	42.4543	14635	21.3867	29.5547	37.7227	18482	2.9e-08	22.3012	30.3239	38.3467	14792	0.385708
55	24.3608	33.316	42.2713	14036	21.4251	29.5404	37.6557	17710	1.68e-14	22.3416	30.3054	38.2692	14286	0.00603109
56	24.5866	33.5322	42.4779	13492	21.5019	29.4934	37.4849	16920	4.39e-10	22.4846	30.5228	38.5611	13802	0.215436
57	24.8412	33.8072	42.7732	12129	21.6955	29.6735	37.6514	15163	2.53e-09	22.5726	30.6357	38.6988	12519	0.626241
58	24.9424	33.8944	42.8464	10028	21.7495	29.6381	37.5268	12436	1.95e-06	22.5422	30.6625	38.7828	10344	0.806202
59	24.9706	33.6994	42.4282	7941	21.9529	29.7766	37.6003	9834	2.51e-11	22.6613	30.6806	38.6999	8225	0.0543518
60	25.0685	33.6959	42.3233	5983	22.1236	29.8687	37.6138	7425	0.000252424	22.6931	30.6243	38.5555	6208	0.929843

## Sheet: F
Figure 5-figure supplement 1F: Number of T1 transitions vs within-stripe AP coordinate
	Number of T1 transitions
Wtihin-stripe AP coordinate (bin centres, normalised 0-1)	S1	S2	S3
0.05	60	52	74
0.15	44	39	40
0.25	22	21	22
0.35	7	12	31
0.45	13	17	38
0.55	4	13	49
0.65	6	19	41
0.75	17	22	29
0.85	60	51	46
0.95	68	61	91

## Sheet: F' Statistics
Figure 5-figure supplement 1 - Statistical analysis
Two-sample Kolmogorov-Smirnov Tests: Exchange events vs. stripe coordinate
S1 vs. S2				S1	S2	S3
p	0.0483		N	301	307	461
D	0.11
Coordinate of max. difference	0.15
S1 vs. S3
p	<0.00001
D	0.245
Coordinate of max. difference	0.25
S2 vs. S3
p	0.000653
D	0.146
Coordinate of max. difference	0.25

## Sheet: G
Figure 5-figure supplement 1G: Interface Myosin II f.i. vs within-stripe AP coordinate
	Interface Myosin II f.i.
	S1			S2			S3
Wtihin-stripe AP coordinate (bin centres, normalised 0-1)	Mean	Mean+CI	Mean-CI	Mean	Mean+CI	Mean-CI	Mean	Mean+CI	Mean-CI
0.05	41.0722	41.4007	40.7436	32.6378	32.9162	32.3595	34.7037	34.9588	34.4487
0.15	36.0268	36.4229	35.6308	32.8331	33.1666	32.4997	30.5112	30.798	30.2245
0.25	27.2696	27.5712	26.968	27.5848	27.9132	27.2564	26.1667	26.4099	25.9235
0.35	24.221	24.5167	23.9253	26.5424	26.8265	26.2582	27.5262	27.7821	27.2702
0.45	22.6881	22.9444	22.4318	25.1028	25.3491	24.8565	30.2183	30.4753	29.9613
0.55	23.0228	23.2685	22.777	24.4907	24.7333	24.248	31.4308	31.7093	31.1522
0.65	23.408	23.6836	23.1324	26.2612	26.541	25.9814	30.6299	30.923	30.3367
0.75	26.5213	26.8472	26.1953	28.0125	28.3027	27.7224	29.4253	29.6895	29.1612
0.85	34.0347	34.3908	33.6786	33.0205	33.3536	32.6874	35.1127	35.4339	34.7915
0.95	33.5135	33.7899	33.2372	34.4158	34.6978	34.1337	43.0837	43.3732	42.7941

## Sheet: H
Figure 5-figure supplement 1H: Intercalation convergence rate in DV vs within-PS AP coordinate
	Intercalation DV convergence rate (pp / hr)
Wtihin-PS AP coordinate (bin centres, normalised 0-1)	Mean	Mean+CI	Mean-CI	N
0.0625	0.894264	0.91422	0.874314	3761
0.1875	0.891096	0.9105	0.871692	3905
0.3125	0.87549	0.895512	0.855468	3503
0.4375	0.931014	0.95025	0.911778	3901
0.5625	0.934122	0.95331	0.914928	3800
0.6875	1.02264	1.04165	1.00363	3762
0.8125	1.01046	1.03042	0.990498	3723
0.9375	0.987906	1.00659	0.969228	3717
