# Supplementary material for: Unipolar distributions of junctional Myosin II identify cell stripe boundaries that drive cell intercalation throughout Drosophila axis extension
Source: eLife journal article supplement (doi:10.7554/elife.12094), 2016-05-16
Supplement: supp [file elife-12094-supp-v1.zip › elife_poa_e12094_Figure_6_source_data_1.xlsx]

## Sheet: A
Figure 6-figure supplement 1A: Histogram of robustness score for 3 receptors
Robustness score	N
0	0
1	0
2	103
3	0
4	1038
5	6874
6	13122
7	28904
8	95620
9	115878
10	179893
11	164732
12	188436
13	97559
14	66315
15	23041
16	12576
17	5622
18	0
19	0
20	287
21	0
22	0
23	0
24	0

## Sheet: B
Figure 6-figure supplement 1C: Histogram of robustness score for 4 receptors
Robustness score	N
0	0
1	0
2	2
3	0
4	85
5	708
6	4351
7	13452
8	59889
9	105775
10	179846
11	209703
12	198981
13	118445
14	69337
15	21328
16	12252
17	4672
18	641
19	257
20	266
21	0
22	0
23	0
24	10
