# Supplementary material for: Unipolar distributions of junctional Myosin II identify cell stripe boundaries that drive cell intercalation throughout Drosophila axis extension
Source: eLife journal article supplement (doi:10.7554/elife.12094), 2016-05-16
Supplement: supp [file elife-12094-supp-v1.zip › elife_poa_e12094_Figure_7_source_data_1.xlsx]

## Sheet: C
Figure 7-figure supplement 1C: Freqency of the different types of interface vs AP within-stripe coordinates
Within-stripe AP coordinate (normalised, 0-1)	nonB	B-nonB	BB	B	superB-nonB
0.05	0	335	1222	15859	0
0.15	68	2536	45	2676	121
0.25	991	10436	179	675	678
0.35	3244	726	69	19	934
0.45	11806	423	22	0	494
0.55	10514	292	0	0	357
0.65	2525	1188	0	0	1151
0.75	1368	10486	0	580	846
0.85	2	2935	191	1350	207
0.95	0	298	1815	14528	0
