# Supplementary figures and images for: Unipolar distributions of junctional Myosin II identify cell stripe boundaries that drive cell intercalation throughout Drosophila axis extension
Source: eLife journal article supplement (doi:10.7554/elife.12094), 2016-05-16

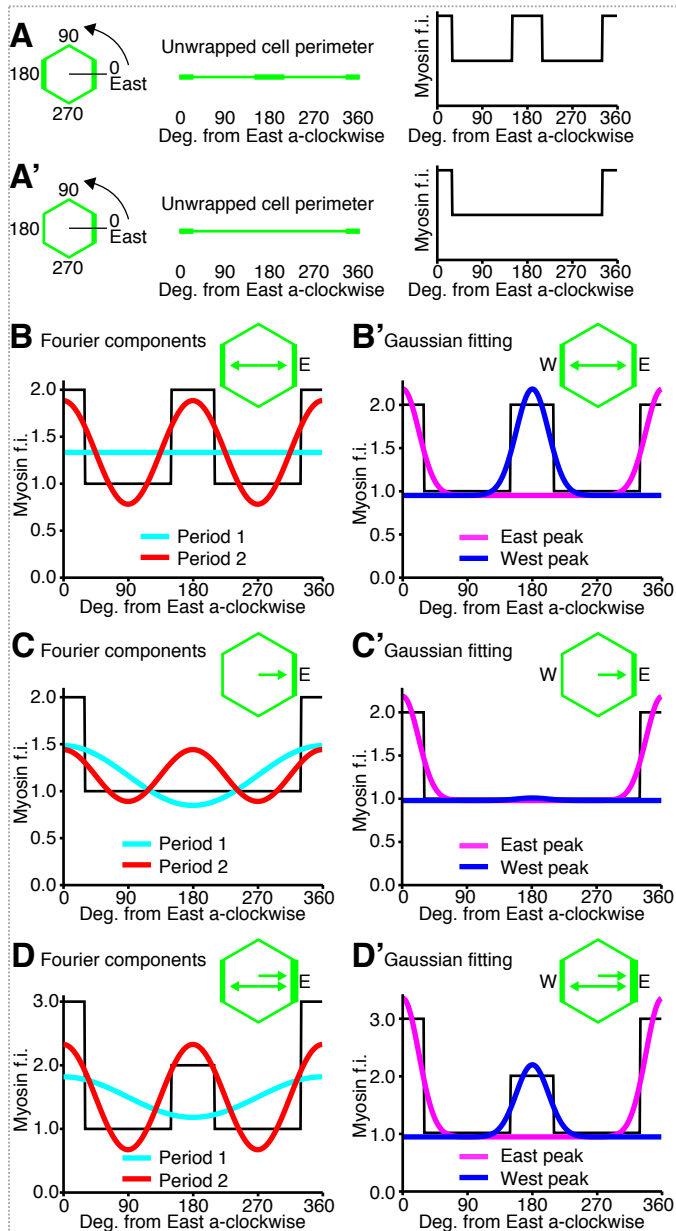

Tetley et al., Figure 1 - figure supplement 2

Supplement: supp [file elife-12094-supp-v1.zip]

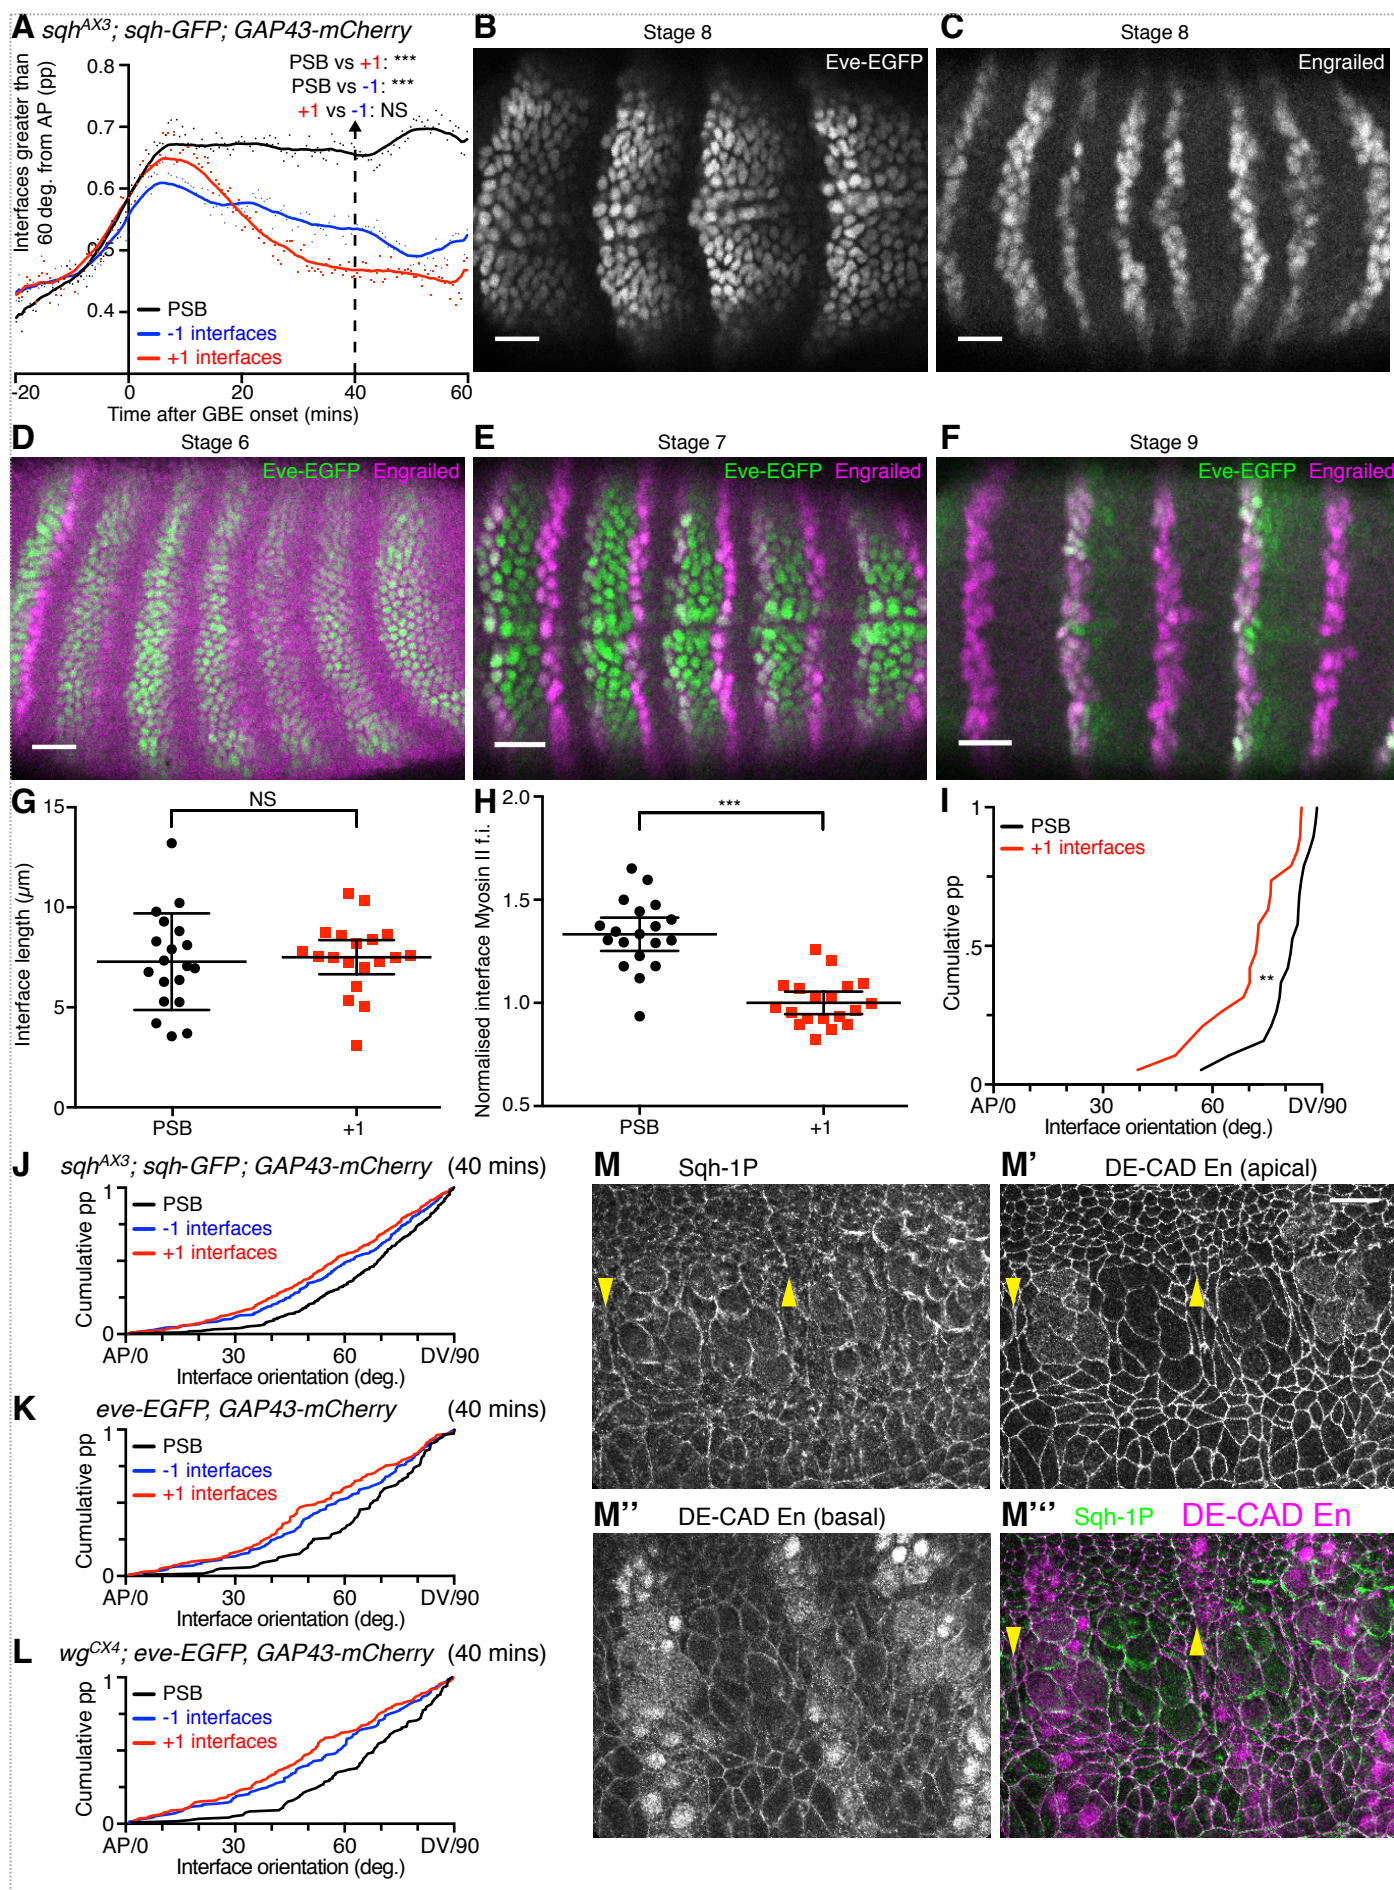

Tetley et al., Figure 2 - figure supplement 1

Supplement: supp [file elife-12094-supp-v1.zip]

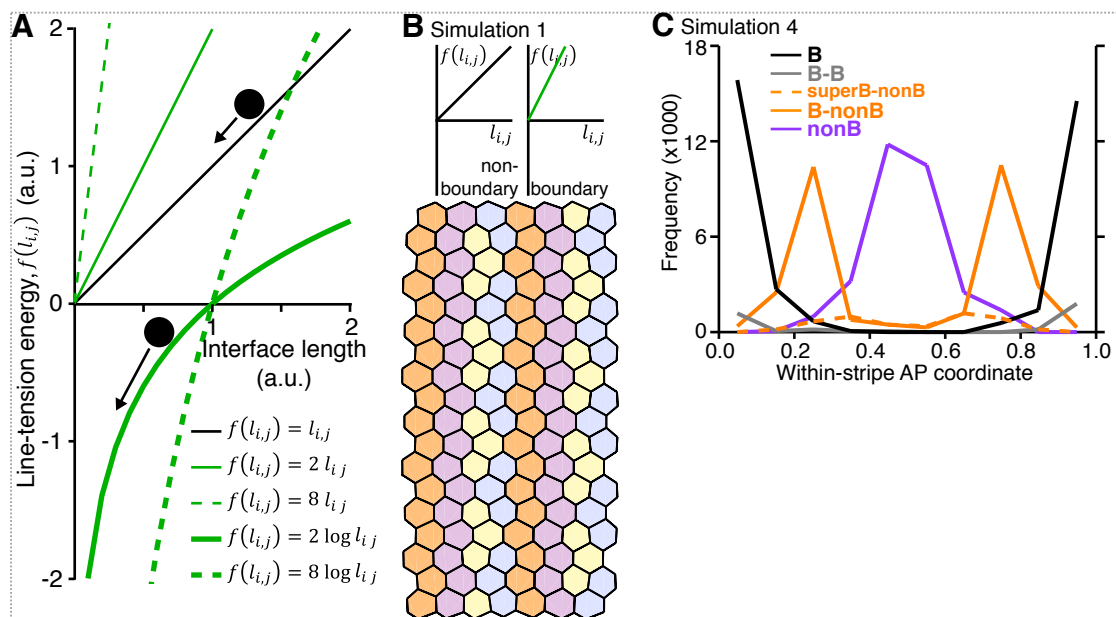

Tetley et al., Figure 7 - figure supplement 1

Supplement: supp [file elife-12094-supp-v1.zip]

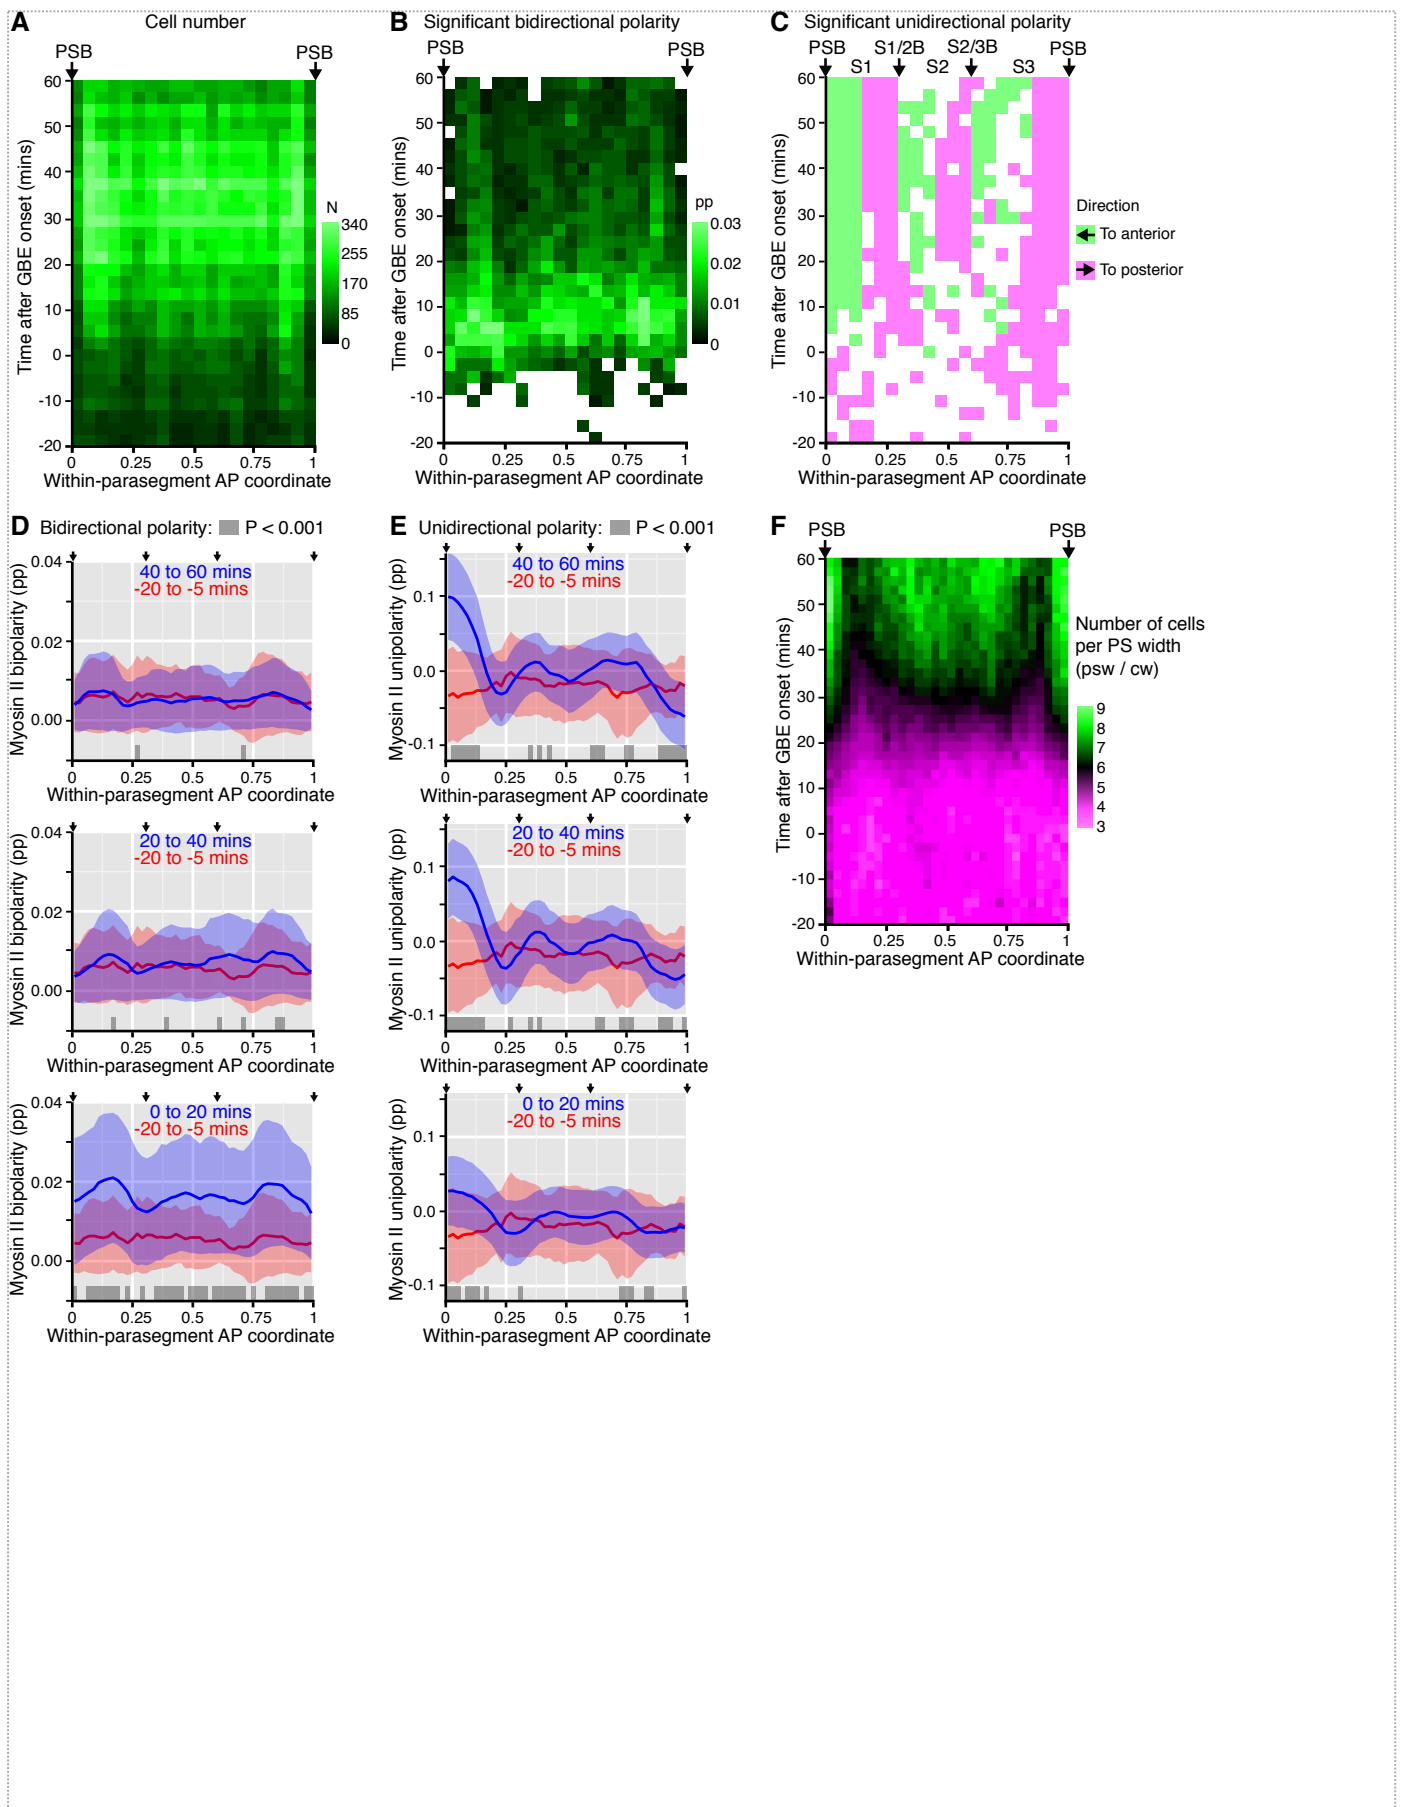

Tetley et al., Figure 3 - figure supplement 1

Supplement: supp [file elife-12094-supp-v1.zip]

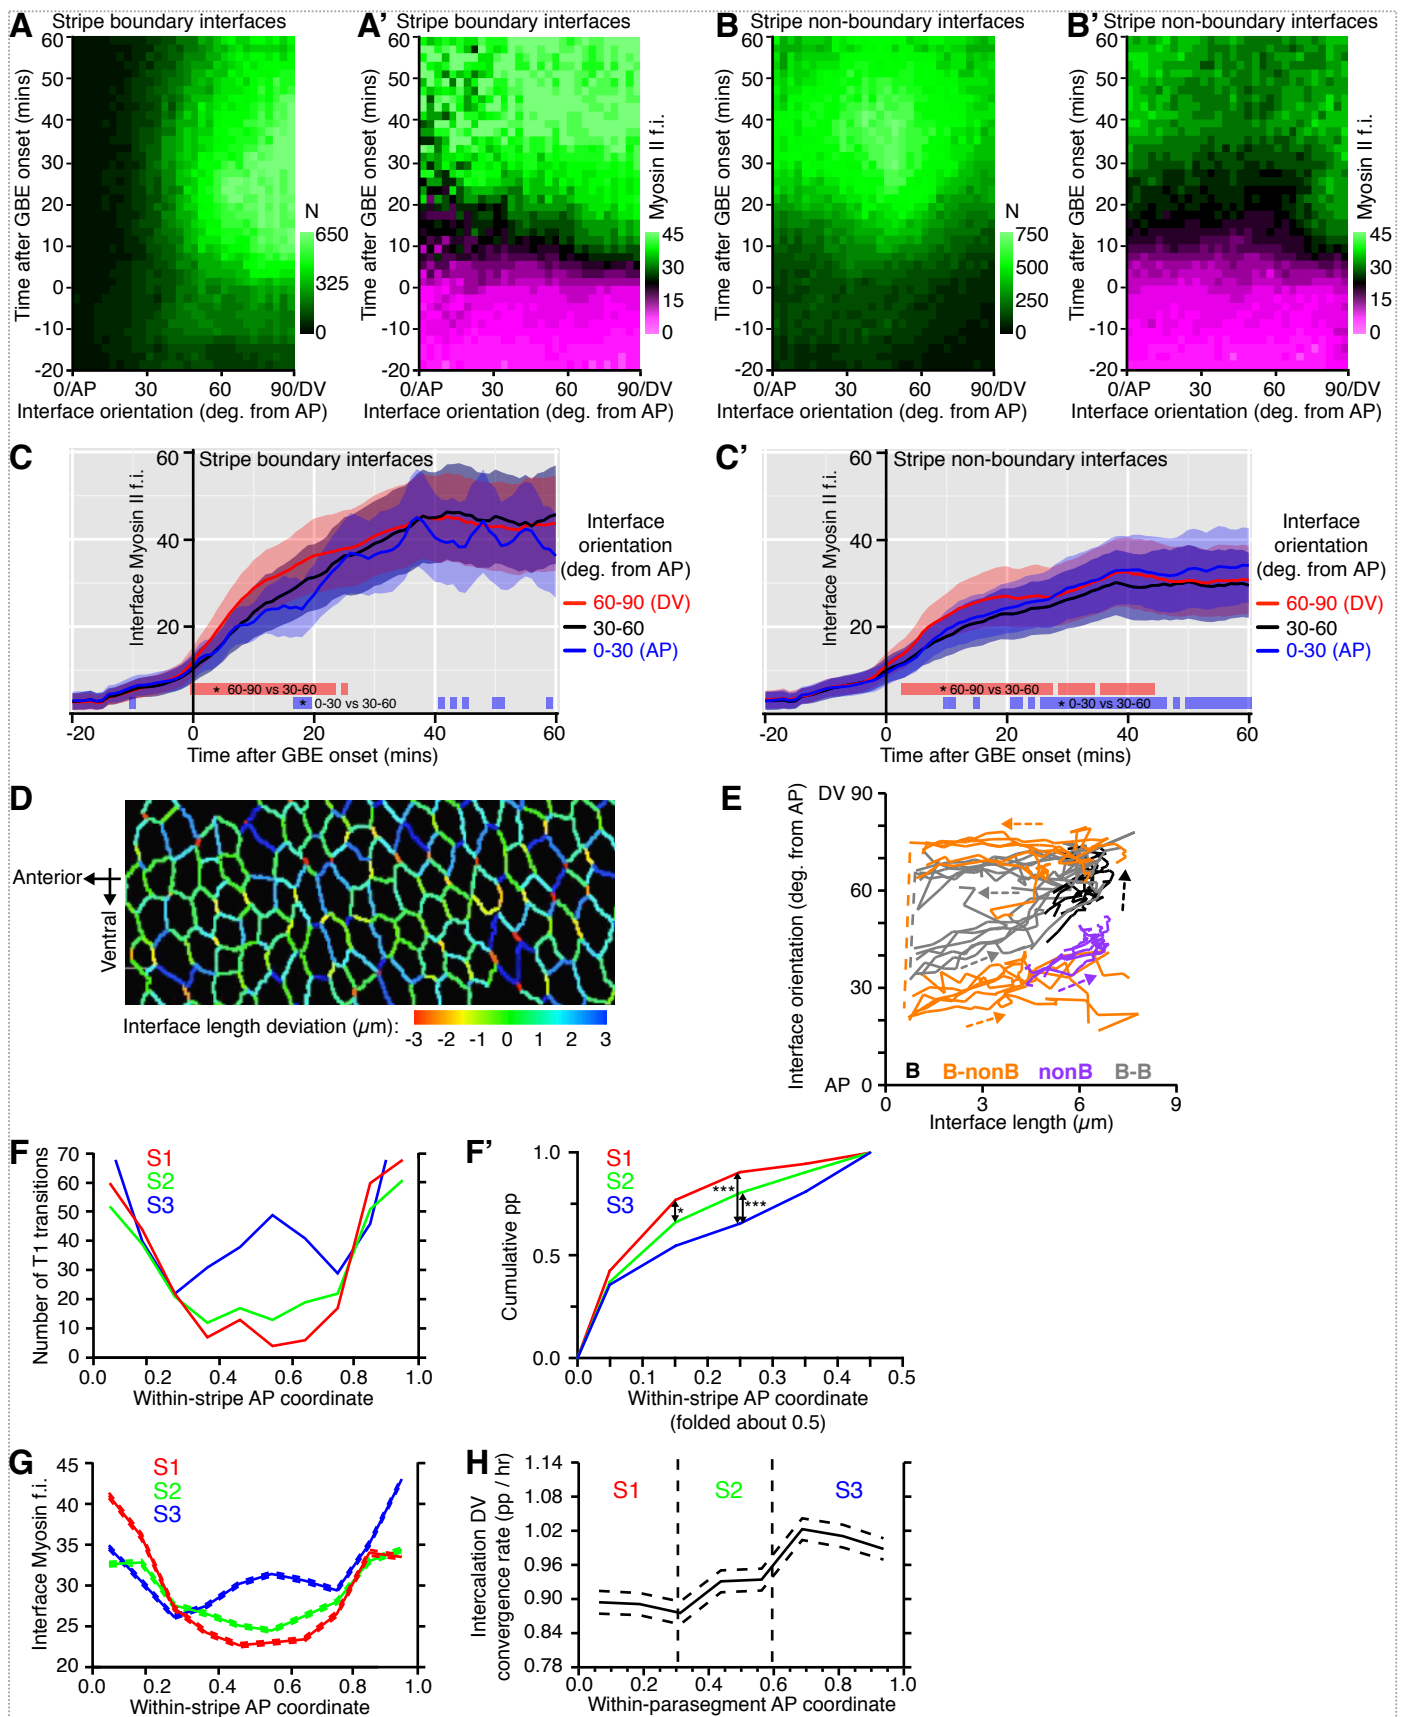

Tetley et al., Figure 5 - figure supplement 1

Supplement: supp [file elife-12094-supp-v1.zip]

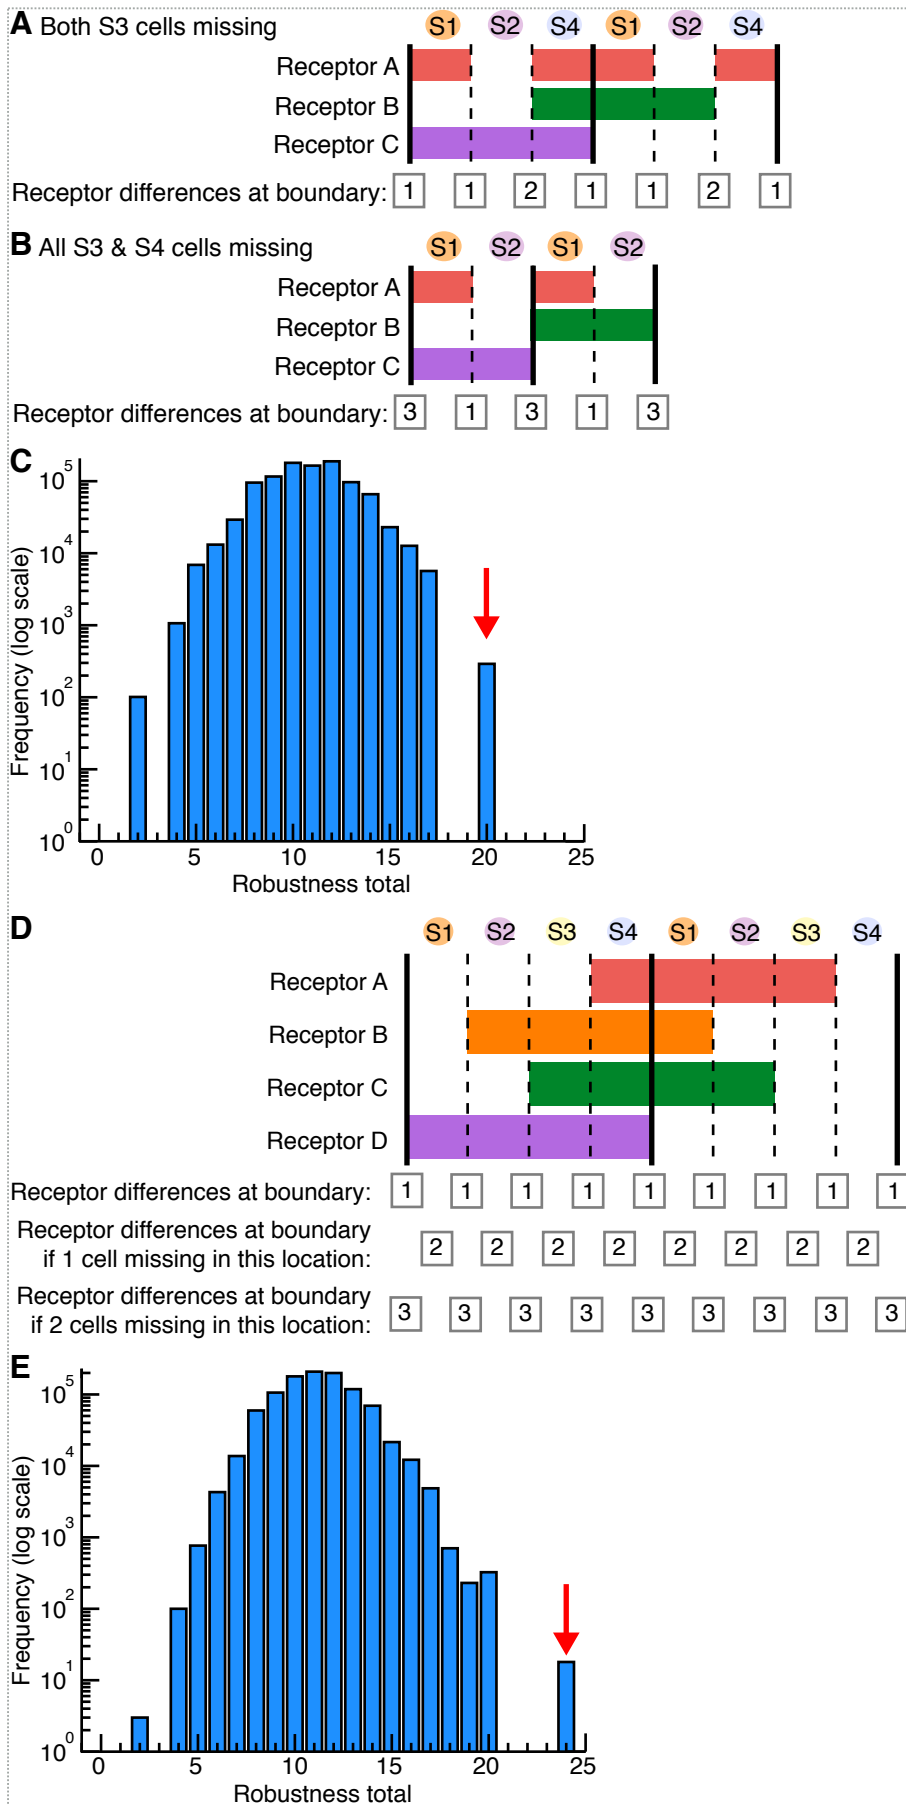

Tetley et al., Figure 6 - figure supplement 1

Supplement: supp [file elife-12094-supp-v1.zip]

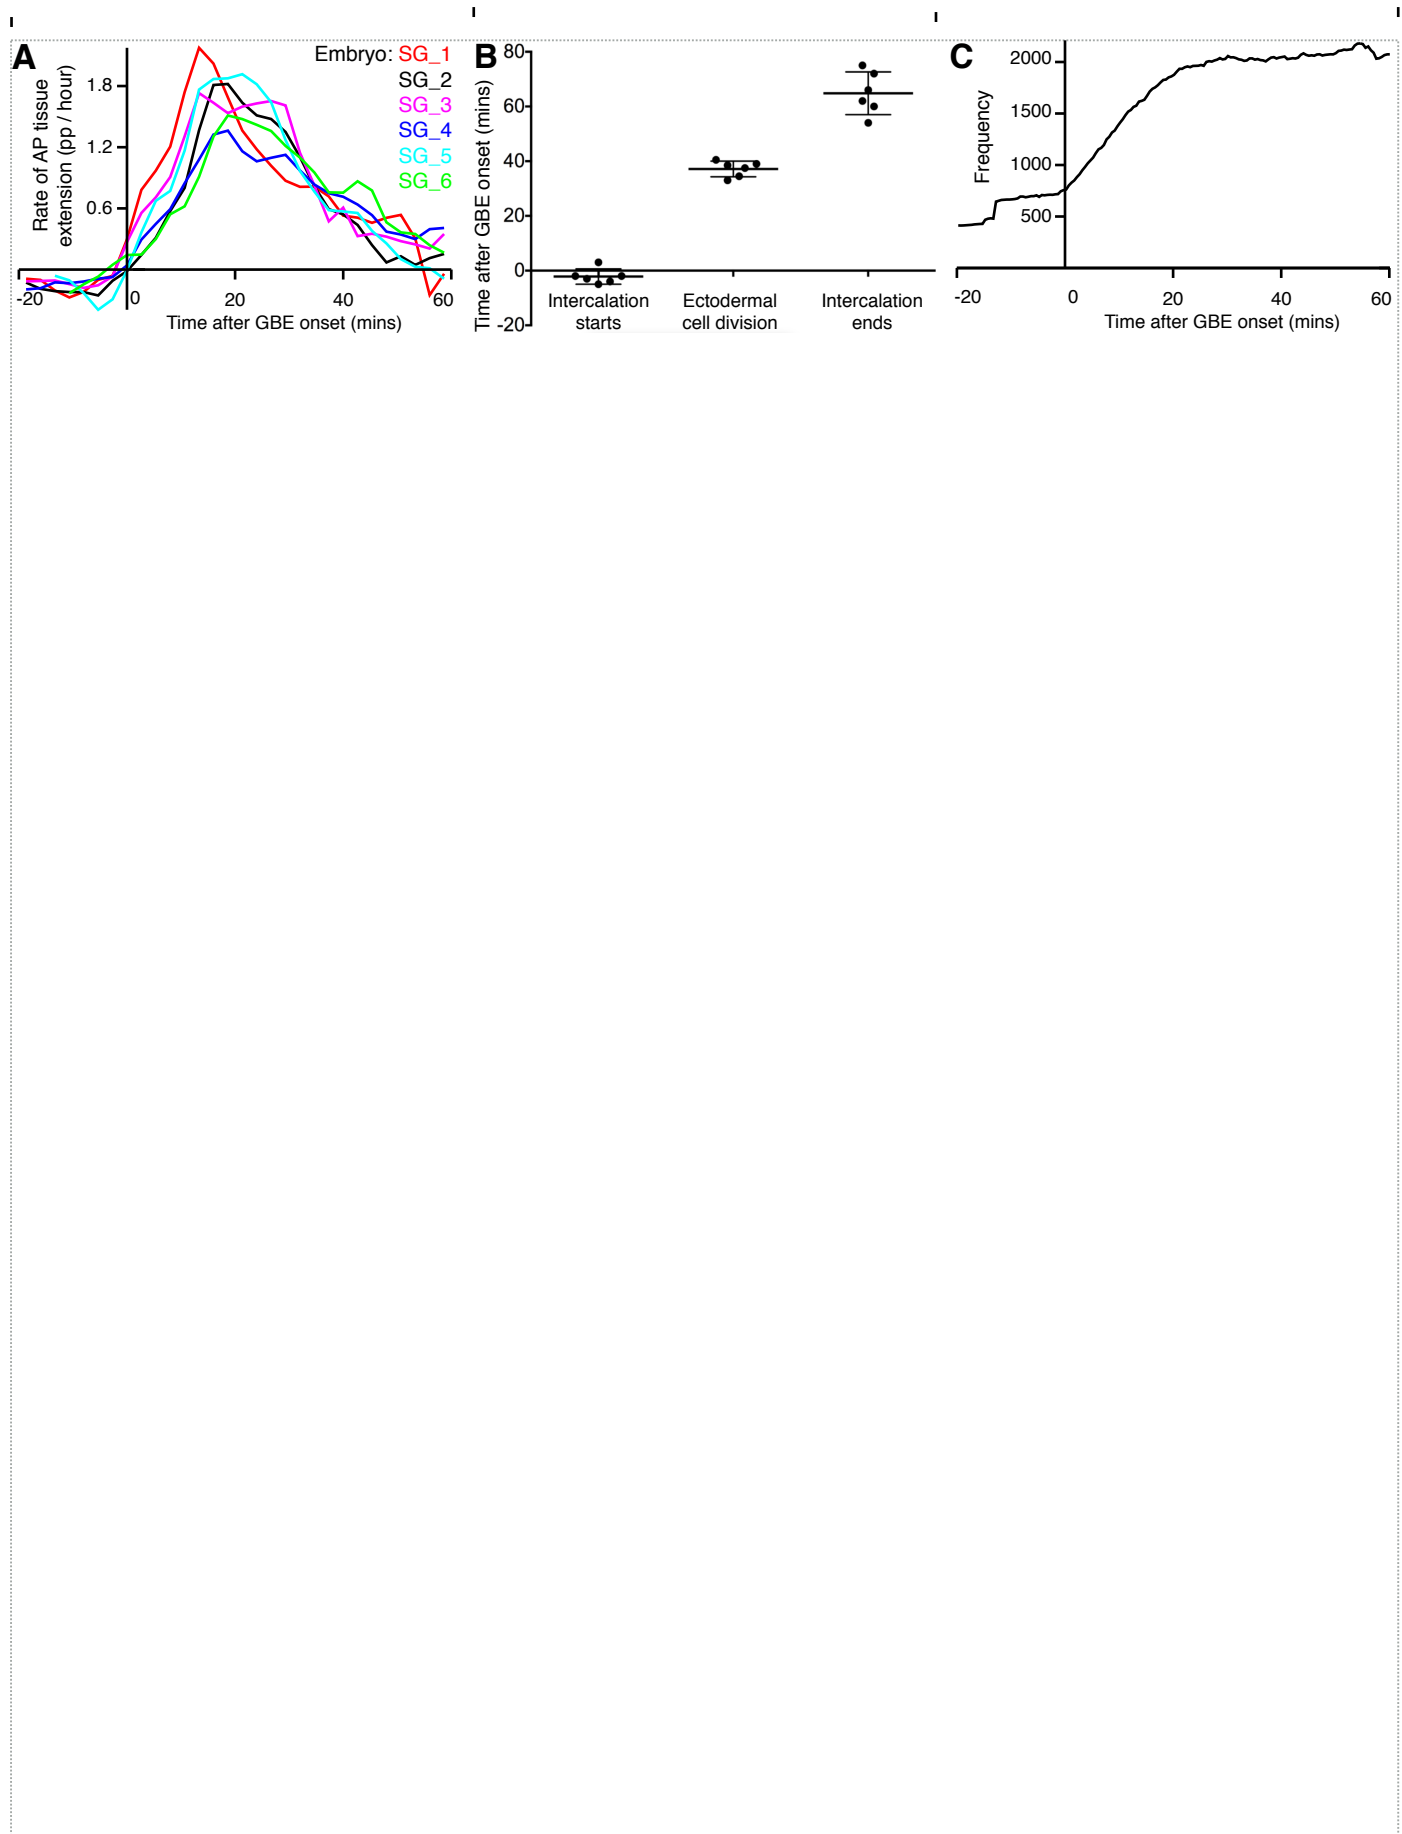

Tetley et al., Figure 1 - figure supplement 1

Supplement: supp [file elife-12094-supp-v1.zip › elife_poa_e12094_Figure_1_figure_supplement_1.pdf]

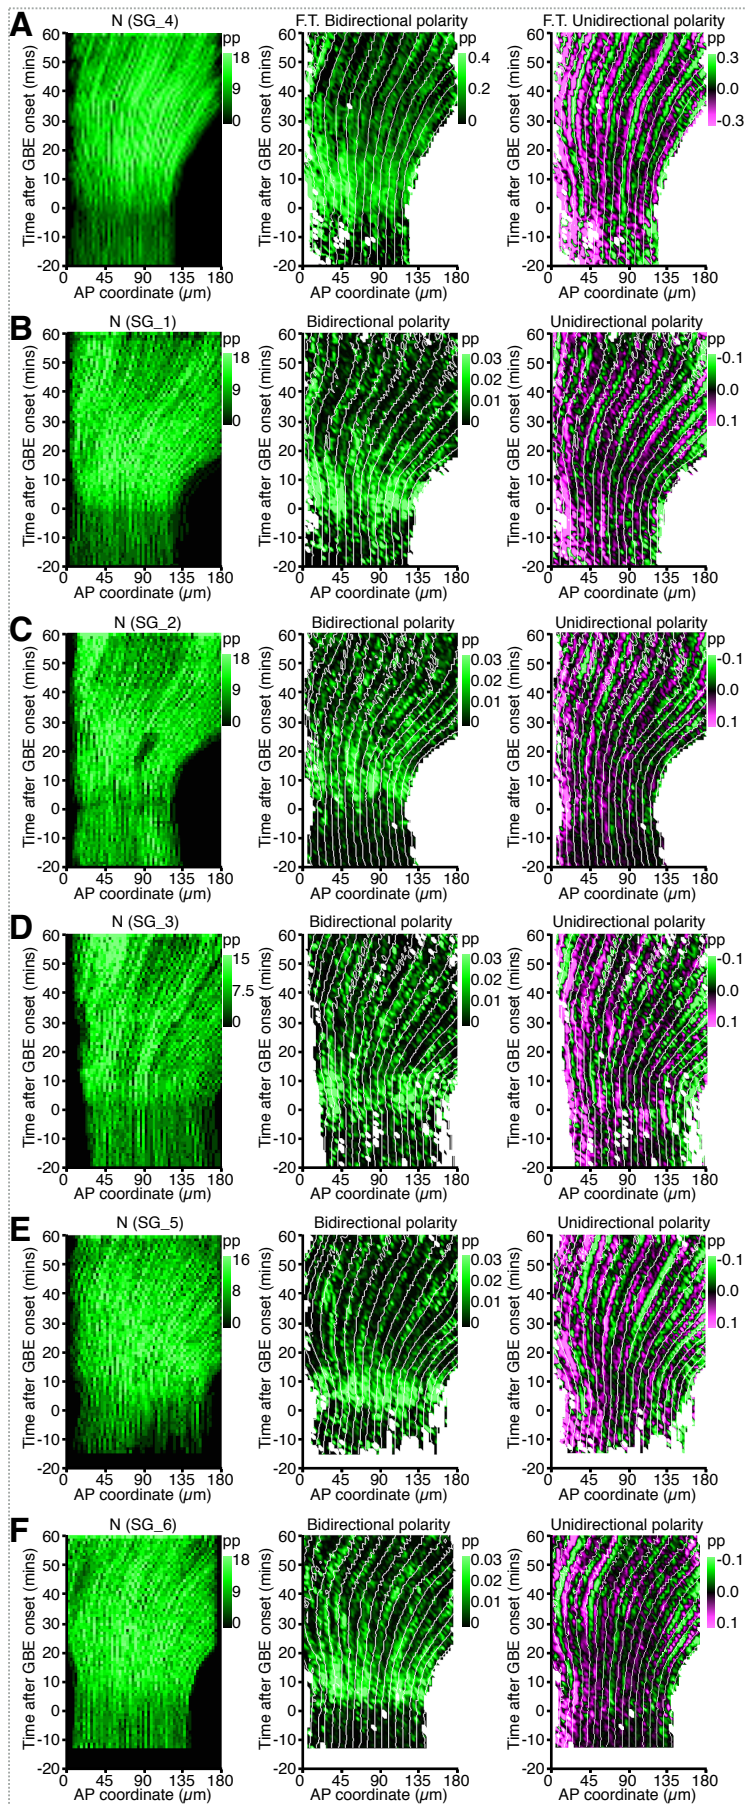

Tetley et al., Figure 1 - figure supplement 3

Supplement: supp [file elife-12094-supp-v1.zip › elife_poa_e12094_Figure_1_figure_supplement_3.pdf]
